# Supplementary material for: Stress-mediated exit to quiescence restricted by increasing persistence in CDK4/6 activation
Source: eLife journal article supplement (doi:10.7554/elife.44571), 2020-04-07

Figure 1 - supplementary figure 1

A

SAGGSAGGKRSAGLNEDESPSKLPSTVSSRLRLTLQRRILSTDSGSKHLPGESKFQQKLAEMTSTRTRMQKQKMNDSDMTSNKEEK

Linker                      NLS                      NES                      CDK4 docking site (Rb Cterm a.a.)

B

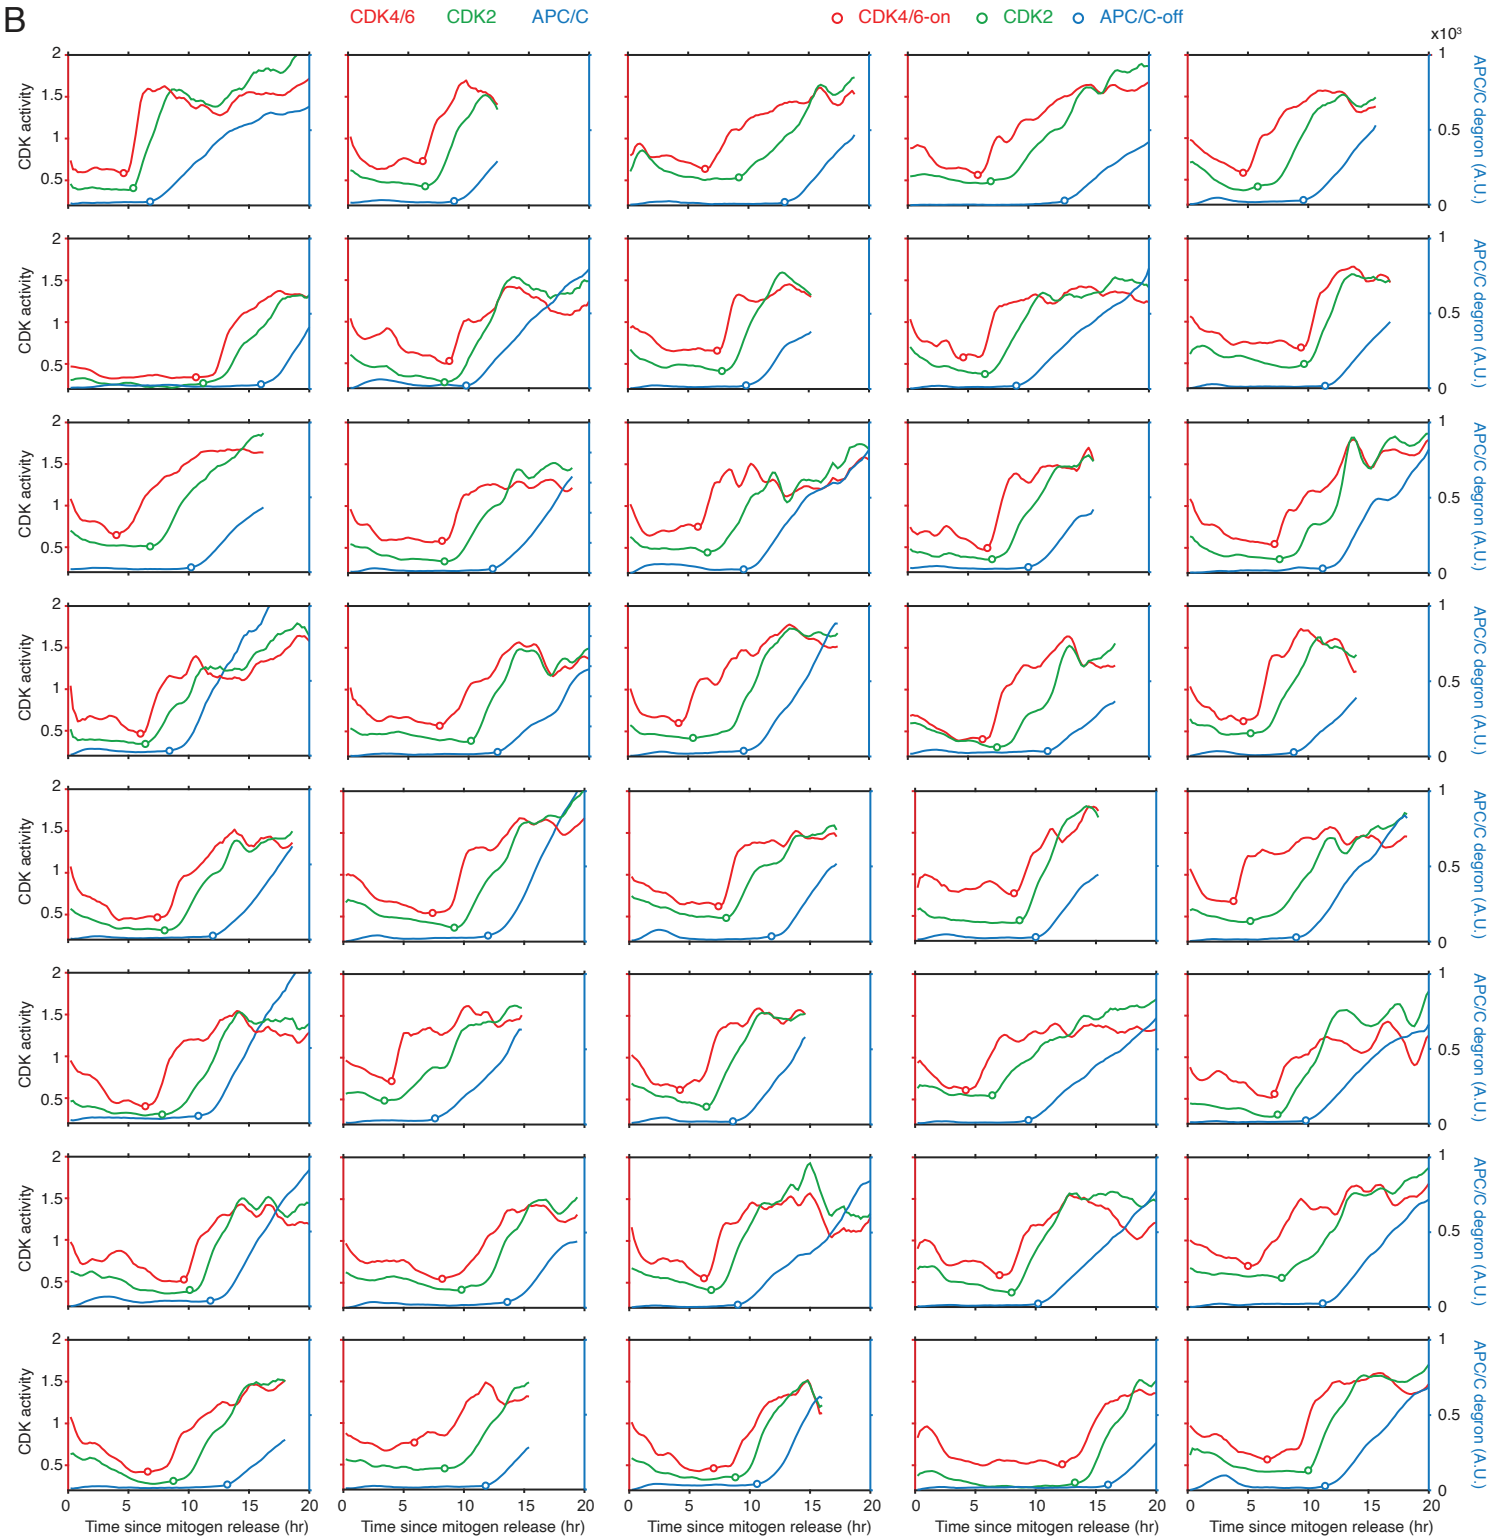

Supplement: supp [file elife_poa_e44571_Figure_1_figure_supplement_1.pdf › elife_poa_e44571_Figure_1_figure_supplement_1.pdf]
