# Supplementary material for: Stress-mediated exit to quiescence restricted by increasing persistence in CDK4/6 activation
Source: eLife journal article supplement (doi:10.7554/elife.44571), 2020-04-07
Supplement: supp [file elife_poa_e44571_Figure_1_figure_supplement_2_source_data_1.xlsx]

## Sheet: CDK2
CDK4/6	0.792173	0.770673	0.817467	0.797291	0.770793	0.810906	0.809086	0.814923
	0.853527	0.826962	0.852534	0.774198	0.840761	0.797615	0.812142	0.796115
CDK2i	0.783066	0.844257	0.910593	0.860148	0.836629	0.783752	0.645046	0.556288
	0.821788	0.880767	0.894366	0.865622	0.841698	0.800423	0.713309	0.636562
CDK1i	0.788372	0.830296	0.879144	0.872445	0.88277	0.8438	0.858202	0.875399
	0.881333	0.883679	0.883418	0.877123	0.884372	0.860761	0.802234	0.752557
MEKi	0.790022	0.868324	0.886859	0.904674	0.868726	0.862925	0.854704	0.825563
	0.863264	0.842317	0.852323	0.855115	0.85895	0.859173	0.84378	0.85349
PI3Ki	0.7693	0.807891	0.872719	0.833832	0.866103	0.852794	0.830077	0.803724
	0.852613	0.828351	0.826739	0.820935	0.807589	0.796035	0.772965	0.74704
EGFRi	0.768332	0.784566	0.847595	0.861223	0.86624	0.834159	0.888633	0.817883
	0.844495	0.822655	0.821541	0.811123	0.81184	0.819034	0.80586	0.808014

## Sheet: CDK4
CDK4/6	0.892498	0.752982	0.698945	0.639089	0.600554	0.590499	0.571115	0.538042
	0.87266	0.785988	0.757293	0.649695	0.689022	0.613326	0.60273	0.560044
CDK2i	0.884988	0.91299	0.966719	0.928186	0.902214	0.856531	0.785261	0.740214
	0.847358	0.9024	0.913409	0.892025	0.861637	0.804308	0.745556	0.689827
CDK1i	0.875788	0.911865	0.945146	0.946792	0.944891	0.933622	0.93868	0.946098
	0.893229	0.907644	0.90926	0.907391	0.914689	0.893856	0.832074	0.770422
MEKi	0.881517	0.946287	0.957645	0.970155	0.945717	0.948146	0.930995	0.893242
	0.869475	0.863165	0.871051	0.876728	0.87441	0.878256	0.857448	0.850495
PI3Ki	0.878467	0.894289	0.94386	0.912981	0.940755	0.928497	0.882341	0.796872
	0.852601	0.84639	0.844204	0.835959	0.80816	0.774406	0.718344	0.650035
EGFRi	0.867252	0.886706	0.928269	0.939935	0.951546	0.92361	0.97559	0.878141
	0.848701	0.837406	0.834142	0.826219	0.827493	0.837017	0.818682	0.805985
