# Supplementary material for: Stress-mediated exit to quiescence restricted by increasing persistence in CDK4/6 activation
Source: eLife journal article supplement (doi:10.7554/elife.44571), 2020-04-07
Supplement: supp [file elife_poa_e44571_Figure_1_figure_supplement_4_source_data_1.xlsx]

## Sheet: Supplemental Fig 2B
Supplemental Figure 2B
	Time since drug added
	-6	-5.8	-5.6	-5.4	-5.2	-5	-4.8	-4.6	-4.4	-4.2	-4	-3.8	-3.6	-3.4	-3.2	-3	-2.8	-2.6	-2.4	-2.2	-2	-1.8	-1.6	-1.4	-1.2	-1	-0.8	-0.6	-0.4	-0.2	0	0.2	0.4	0.6	0.8	1	1.2	1.4	1.6	1.8	2	2.2	2.4	2.6	2.8	3	3.2	3.4	3.6
DMSO
Cell #
1	1.48124	1.48845	1.50947	1.54593	1.55689	1.56426	1.56191	1.54631	1.51839	1.53321	1.38863	1.24579	1.11006	0.985078	0.880697	0.950591	1.04219	1.13486	1.23077	1.26003	1.26955	1.26653	1.26334	1.2624	1.27767	1.29235	1.3099	1.32337	1.32023	1.29267	1.29119	1.27145	1.25892	1.2528	1.2717	1.27651	1.28201	1.2821	1.28926	1.28784	1.27066	1.24967	1.24086	1.22931	1.21119	1.22151	1.23904	1.24195	1.24886
2	1.41058	1.44396	1.4649	1.49978	1.56213	1.61154	1.66446	1.69682	1.72163	1.75298	1.74051	1.55442	1.33582	1.107	0.901704	0.75722	0.784252	0.862914	0.933455	0.983831	1.02553	1.07626	1.10643	1.13352	1.14183	1.11838	1.09839	1.10317	1.12435	1.13061	1.14866	1.16311	1.16907	1.15614	1.14922	1.16057	1.16629	1.17306	1.18186	1.19454	1.20548	1.21367	1.21644	1.23076	1.24451	1.24793	1.252	1.25549	1.26442
3	1.41058	1.44396	1.4649	1.49978	1.56213	1.61154	1.66446	1.69682	1.72163	1.75298	1.74051	1.55442	1.33582	1.15203	0.927603	0.816548	0.89091	0.977438	0.991967	1.02355	1.02058	1.00884	1.04298	1.1041	1.15469	1.16429	1.17143	1.17439	1.17371	1.18643	1.19562	1.21317	1.22546	1.23708	1.24975	1.25428	1.24162	1.22771	1.21107	1.18699	1.17092	1.1637	1.16132	1.16643	1.18305	1.20854	1.24613	1.28168	1.32648
4	1.40516	1.40895	1.44499	1.4895	1.50565	1.56905	1.61087	1.6242	1.61877	1.63961	1.64037	1.62677	1.54225	1.38763	1.21864	1.02157	0.881277	0.832838	0.852921	0.872912	0.92284	0.935434	0.925892	0.925421	0.918821	0.917732	0.927653	0.95301	0.976639	1.00005	1.0063	1.00681	1.00748	0.994999	0.975522	0.963651	0.969779	0.968624	0.972974	0.981665	1.0047	1.00644	1.00933	1.03532	1.05317	1.07793	1.10258	1.10955	1.0678
5	1.40516	1.40895	1.44499	1.4895	1.50565	1.56905	1.61087	1.6242	1.61877	1.63961	1.64037	1.62677	1.54225	1.38763	1.21864	1.07546	0.962533	0.950943	1.0107	1.04427	1.05648	1.06113	1.04211	1.01967	1.04061	1.05206	1.09538	1.14084	1.19506	1.2229	1.2688	1.27889	1.29141	1.29909	1.31462	1.30616	1.28253	1.23952	1.18862	1.12795	1.08803	1.0903	1.11148	1.15477	1.19741	1.22936	1.23131	1.22486	1.19294
6	1.43111	1.4602	1.47928	1.52143	1.57763	1.62884	1.63838	1.66086	1.66254	1.65144	1.61583	1.58815	1.55061	1.33321	1.13489	0.957335	0.82681	0.775031	0.905424	0.99641	1.08502	1.12455	1.08379	1.05554	1.01216	1.00497	0.993833	0.994117	0.971314	0.982823	0.97233	0.989323	0.995234	0.978327	0.97793	0.987017	1.00477	1.01537	1.06469	1.10118	1.1206	1.12787	1.16099	1.17421	1.19237	1.23654	1.26139	1.27194	1.2968
7	1.43111	1.4602	1.47928	1.52143	1.57763	1.62884	1.63838	1.66086	1.66254	1.65144	1.61583	1.58815	1.55061	1.33321	1.13489	0.974998	0.819254	0.725904	0.798539	0.847851	0.884886	0.935915	0.941818	0.957056	0.986992	1.00092	0.997131	0.963618	0.938312	0.890371	0.849698	0.829712	0.805583	0.7819	0.760398	0.750508	0.728169	0.714291	0.696577	0.696493	0.679011	0.64274	0.621162	0.624377	0.615413	0.629964	0.678645	0.718416	0.744851
8	1.23829	1.21152	1.19108	1.19853	1.21838	1.23311	1.28315	1.32023	1.33656	1.33047	1.33325	1.35543	1.41257	1.29394	1.19206	1.06823	0.934642	0.783398	0.81585	0.843314	0.892742	0.913571	0.922157	0.946441	0.964965	0.99667	1.04095	1.07675	1.09472	1.09793	1.09824	1.10935	1.15461	1.2038	1.26549	1.33301	1.38239	1.4009	1.40816	1.41742	1.40721	1.37461	1.33303	1.30183	1.26272	NaN	1.20245	1.15837	1.11943
9	1.51865	1.48714	1.45116	1.41796	1.39904	1.40027	1.40853	1.4184	1.4186	1.43436	1.44479	1.46977	1.45902	1.35123	1.221	1.10451	0.9977	0.925783	0.94433	0.964038	0.968522	0.958778	0.958327	0.981398	1.00118	1.01476	1.03364	1.05245	1.05089	1.05032	1.04775	1.05102	1.05386	1.06313	1.07491	1.09835	1.11452	1.12572	1.13923	1.154	1.15228	1.15584	1.16754	1.17961	1.19109	1.21222	1.22667	1.2396	1.23918
10	1.4073	1.44436	1.45521	1.44972	1.46007	1.45935	1.47429	1.48468	1.5121	1.55065	1.59167	1.64385	1.50313	1.33662	1.15377	0.985697	0.829656	0.920475	1.05067	1.15949	1.23285	1.25925	1.23141	1.17256	1.1335	1.11389	1.11246	1.11885	1.1295	1.13023	1.11716	1.10519	1.08151	1.06396	1.0457	1.05023	1.05163	1.05489	1.04719	1.073	1.08368	1.10434	1.12483	1.13628	1.13237	1.1404	1.13101	1.11839	1.12135
11	1.4073	1.44436	1.45521	1.44972	1.46007	1.45935	1.47429	1.48468	1.5121	1.55065	1.59167	1.64385	1.50313	1.33662	1.15377	0.977519	0.769497	0.766225	0.784255	0.835365	0.870152	0.911276	0.939606	0.97709	0.990328	1.00959	1.02364	1.03826	1.03393	1.00502	0.983162	0.991851	0.999904	1.00094	1.01424	1.02472	1.01299	1.0053	0.997116	0.991185	0.994903	1.00773	1.02225	1.04153	1.05995	1.06416	1.05986	1.04177	1.01662
12	1.42679	1.4627	1.49882	1.52786	1.54008	1.54305	1.54716	1.56737	1.5795	1.59514	1.61343	1.60454	1.56581	1.39454	1.22935	1.03497	0.867817	0.77619	0.862189	0.927572	1.00871	1.08134	1.10099	1.07102	1.06664	1.06886	1.07423	1.07628	1.07275	1.04808	1.02721	1.00943	0.998157	0.997288	1.00343	1.01982	1.03133	1.04896	1.07714	1.10014	1.10521	1.12694	1.14961	1.16241	1.1845	1.21665	1.23304	1.2314	1.22229
13	1.42679	1.4627	1.49882	1.52786	1.54008	1.54305	1.54716	1.56737	1.5795	1.59514	1.61343	1.60454	1.56581	1.39454	1.22935	1.02544	0.87794	0.773679	0.827023	0.885428	0.971783	1.02529	1.04535	1.03567	1.01676	1.00192	0.987664	0.98369	0.982162	0.965026	0.951237	0.93601	0.92747	0.923116	0.933714	0.948005	0.963647	0.977355	0.990267	1.007	1.02532	1.04506	1.0647	1.09495	1.12739	1.15959	1.18197	1.19554	1.17061
14	1.3588	1.37331	1.42206	1.46239	1.50079	1.52054	1.54519	1.55538	1.58788	1.61994	1.65297	1.67478	1.69385	1.51629	1.32272	1.14774	0.992865	0.905499	1.00607	1.09019	1.1361	1.17644	1.13662	1.0865	1.04873	1.02897	1.00669	0.990759	0.993432	0.995337	1.00407	1.03529	1.06162	1.07997	1.11857	1.15438	1.1568	1.16801	1.178	1.18745	1.20125	1.23102	1.25785	1.28168	1.29802	1.30917	1.31161	1.31363	1.31281
15	1.56922	1.61324	1.64394	1.65643	1.63543	1.61011	1.60632	1.59719	1.60785	1.61865	1.62022	1.46373	1.29043	1.122	0.964622	0.787701	0.784321	0.874385	0.982669	1.05508	1.15136	1.21256	1.15274	1.07882	1.04375	1.02815	1.03797	1.09437	1.12572	1.12688	1.10712	1.09416	1.08073	1.08767	1.10786	1.14549	1.17295	1.19305	1.19539	1.20843	1.2294	1.2467	1.26417	1.28599	1.29578	1.30631	1.32659	1.32746	1.32768
16	1.56922	1.61324	1.64394	1.65643	1.63543	1.61011	1.60632	1.59719	1.60785	1.61865	1.62022	1.46373	1.29043	1.122	0.964622	0.811844	0.826937	0.884807	0.956974	1.03981	1.11988	1.17747	1.18696	1.16075	1.09603	1.02352	0.963767	0.931977	0.909464	0.902882	0.918868	0.949357	0.98441	1.0299	1.07312	1.11313	1.13519	1.1528	1.15737	1.17694	1.20474	1.24003	1.26262	1.28765	1.3093	1.31519	1.32752	1.32935	1.34255
17	1.51865	1.48714	1.45116	1.41796	1.39904	1.40027	1.40853	1.4184	1.4186	1.43436	1.44479	1.46977	1.45902	1.35123	1.221	1.10598	0.990112	0.897501	0.892656	0.887857	0.859297	0.835491	0.833188	0.841795	0.852983	0.861301	0.866848	0.866126	0.868692	0.864977	0.875136	0.887223	0.907026	0.932489	0.967892	0.991975	1.00439	1.01555	1.00871	1.00134	1.00311	1.02104	1.05028	1.0893	1.12556	1.15175	1.16609	1.17133	1.18015
18	1.52764	1.5275	1.5594	1.58683	1.60815	1.64234	1.65294	1.66041	1.6878	1.73424	1.78876	1.81932	1.84489	1.63336	1.42323	1.18335	0.965697	0.797937	0.919825	1.04819	1.17387	1.27872	1.31909	1.28763	1.23203	1.21211	1.20846	1.21617	1.2311	1.24364	1.22339	1.21272	1.20881	1.20927	1.23395	1.28164	1.32309	1.34201	1.35382	1.36114	1.36637	1.36724	1.38037	1.39375	1.40288	1.40155	1.39106	1.38327	1.37376
19	1.46963	1.44676	1.42734	1.40605	1.38871	1.40444	1.422	1.42772	1.44391	1.47173	1.49488	1.50353	1.38501	1.266	1.12467	0.959646	0.822881	0.884089	0.961443	1.03143	1.09547	1.13594	1.09333	1.02946	0.994218	0.982989	0.987073	1.01941	1.08493	1.14424	1.19286	1.22493	1.22203	1.17597	1.13668	1.09663	1.06259	1.04526	1.04503	1.0388	1.04476	1.0564	1.07301	1.09757	1.1159	1.13815	1.16019	1.18905	1.21436
20	1.46963	1.44676	1.42734	1.40605	1.38871	1.40444	1.422	1.42772	1.44391	1.47173	1.49488	1.50353	1.38501	1.266	1.12467	0.959646	0.811465	0.843861	0.903888	0.994368	1.09094	1.16762	1.19778	1.18718	1.14929	1.1306	1.13133	1.12893	1.12273	1.12516	1.12758	1.13154	1.12335	1.1195	1.11812	1.10074	1.07609	1.06529	1.09759	1.1227	1.14857	1.1742	1.21428	1.20782	1.21179	1.21788	1.22895	1.22953	1.24576
21	1.3931	1.42585	1.47991	1.55703	1.63789	1.71069	1.78004	1.61218	1.4259	1.23301	1.074	0.922629	0.976663	1.01217	1.03655	1.00013	0.936075	0.886069	0.850793	0.837893	0.84988	0.874849	0.909449	0.957341	1.00845	1.06102	1.11378	1.15546	1.18113	1.18537	1.17186	1.15485	1.14293	1.13844	1.14685	1.16611	1.18192	1.19761	1.20343	1.19997	1.19027	1.18756	1.18483	1.18161	1.17994	1.18217	1.18181	1.18173	1.18331
22	1.51275	1.53859	1.56365	1.59262	1.62956	1.65123	1.66297	1.671	1.48634	1.31913	1.16443	1.03364	0.919659	1.01808	1.09634	1.16386	1.20474	1.19943	1.16621	1.13401	1.11045	1.09695	1.1161	1.14125	1.16995	1.20634	1.23333	1.24372	1.24711	1.21894	1.1888	1.15726	1.13095	1.11072	1.13032	1.14099	1.16416	1.19016	1.21519	1.2248	1.24373	1.25292	1.25958	1.26887	1.27341	1.27391	1.2817	1.28877	1.29271
23	1.51422	1.49821	1.46483	1.4881	1.50205	1.53889	1.53837	1.55319	1.40867	1.25046	1.07091	0.909646	0.809938	0.863862	0.912496	0.958802	1.02044	1.01368	0.989165	0.996295	0.995633	0.993277	1.00477	1.02508	1.04561	1.06124	1.05665	1.05533	1.04914	1.02966	1.04117	1.07334	1.14829	1.2059	1.27128	1.31262	1.38958	1.39277	1.3842	1.38197	1.36923	1.33832	1.33207	1.36326	1.37538	1.40552	1.41311	1.40958	1.38811
24	1.3091	1.3091	1.32173	1.32457	1.33415	1.34164	1.3463	1.36673	1.4155	1.30964	1.20828	1.11841	1.00716	0.903238	0.950101	1.00046	1.03835	1.07567	1.08604	1.1004	1.10576	1.09046	1.09374	1.10298	1.1175	1.14664	1.19497	1.22726	1.25932	1.26865	1.26596	1.26948	1.26183	1.2446	1.25727	1.26538	1.23915	1.22432	1.20655	1.15432	1.11503	1.09564	1.08404	1.08531	1.1155	1.14529	1.18886	1.23759	1.29098
25	1.50857	1.52387	1.53917	1.55671	1.56754	1.57302	1.55148	1.54233	1.50582	1.3645	1.21986	1.10598	0.984745	0.912027	0.953361	0.992714	0.99864	0.992041	0.946736	0.88941	0.845653	0.817882	0.809289	0.813221	0.807504	0.79638	0.800962	0.811655	0.838076	0.884766	0.929569	0.982338	1.01913	1.03422	1.02799	0.991214	0.943144	0.893038	0.839817	0.797859	0.791142	0.770356	0.761744	0.761053	0.771094	0.775983	0.799595	0.81433	0.830219
26	1.50857	1.52387	1.53917	1.55671	1.56754	1.57302	1.55148	1.54233	1.50582	1.3645	1.21986	1.09695	0.98692	0.928327	0.993369	1.05218	1.10148	1.12204	1.11135	1.08549	1.06669	1.05871	1.06165	1.07199	1.08457	1.10632	1.13094	1.15666	1.18162	1.20182	1.20878	1.21571	1.21716	1.20636	1.19679	1.19726	1.18707	1.18898	1.20542	1.22816	1.24901	1.27446	1.28719	1.30081	1.30156	1.29764	1.29078	1.29614	1.28705
27	1.15422	1.20962	1.2693	1.30317	1.33818	1.35444	1.38921	1.37728	1.3798	1.21674	1.05969	0.964028	0.909775	NaN	0.834051	0.8891	0.956501	0.964558	0.969102	0.976274	0.989566	1.01681	1.05105	1.08789	1.13417	1.18671	1.2402	1.28661	1.32767	1.32871	1.33793	1.33922	1.34988	1.35378	1.36766	1.34198	NaN	1.32208	1.27785	1.23154	1.20349	1.20274	1.1986	1.21408	1.23745	1.25817	1.26246	1.26275	1.25778
28	1.64259	1.64217	1.64234	1.63682	1.63055	1.62472	1.63691	1.65028	1.64767	1.49436	1.33098	1.13497	0.877578	0.688267	0.696312	0.721763	0.770358	0.878081	0.976604	1.02771	1.08216	1.11796	1.16522	1.18304	1.18236	1.18921	1.20739	1.21121	1.19887	1.18327	1.14105	1.11462	1.09285	1.07303	1.07097	1.06974	1.05186	1.02494	1.01476	1.02742	1.05935	1.08494	1.11898	1.14508	1.15615	1.17025	1.19049	1.21131	1.22048
29	1.64259	1.64217	1.64234	1.63682	1.63055	1.62472	1.63691	1.65028	1.64767	1.49436	1.33098	1.13497	0.906503	0.71606	0.731332	0.762925	0.816061	0.916421	1.00091	1.0387	1.07736	1.10542	1.1167	1.12473	1.1326	1.14217	1.15345	1.15743	1.16232	1.14569	1.11523	1.10142	1.09721	1.08082	1.08332	1.09274	1.09146	1.08954	1.10615	1.1212	1.13529	1.15144	1.1708	1.17456	1.19366	1.2242	1.26009	1.30401	1.3585
30	1.21362	1.21266	1.26696	1.32459	1.41064	1.49546	1.50627	1.50723	1.50019	1.44132	1.29421	1.18004	1.07912	0.983435	0.925263	NaN	NaN	NaN	0.907607	0.87068	0.835033	0.792312	0.774013	0.773412	0.800269	0.833226	0.856262	0.874214	0.911809	0.936097	0.930993	0.938486	0.939388	0.933418	0.926842	0.911495	0.874661	0.855334	0.848702	0.832012	0.856745	0.898998	0.926014	0.929761	0.927452	0.926863	0.926831	0.930867	0.930612
31	1.21362	1.21266	1.26696	1.32459	1.41064	1.49546	1.50627	1.50723	1.50019	1.44132	1.29421	1.18004	1.07998	1.00427	1.00476	1.07934	1.14688	1.19155	1.18327	1.1351	1.05726	0.977436	0.907468	0.859781	0.83464	0.840148	0.869957	0.920653	0.968082	0.994982	1.00784	1.01104	0.994352	0.971346	0.96646	0.968737	0.962293	0.964555	0.98195	1.00311	1.02935	1.0554	1.08062	1.1008	1.11365	1.12422	1.13485	1.13949	1.13846
32	1.4929	1.49856	1.51784	1.51776	1.49915	1.46634	1.42324	1.37946	1.31336	1.28175	1.32082	1.22615	1.12713	1.02681	0.854251	0.651146	0.639827	0.669625	0.745656	0.868052	0.96294	1.01474	1.03871	1.04244	1.05361	1.06411	1.06829	1.04885	1.02706	0.985753	0.948282	0.92755	0.924819	0.916665	0.923275	0.933695	0.937559	0.934258	0.93649	0.940435	0.940212	0.932408	0.920202	0.908394	0.896318	0.889648	0.889043	0.89552	0.905417
33	1.26587	1.34214	1.39236	1.39961	1.3893	1.39517	1.38666	1.39521	1.43066	1.48252	1.48228	1.48117	1.49649	1.34973	1.20778	1.09804	0.991303	0.902657	0.968002	1.00647	1.0379	1.0527	1.03306	1.02006	1.01905	1.00944	1.00575	1.00581	1.00776	1.01741	1.05295	1.09989	1.13081	1.15166	1.1728	1.17667	1.19046	1.20609	1.21536	1.22337	1.23488	1.21745	1.22915	1.24751	1.25909	1.29181	1.33317	1.35448	1.37425
34	1.77525	1.85265	1.87142	1.82052	1.80352	1.82475	1.78938	1.79181	1.82171	1.88282	1.57229	1.35736	1.10262	0.915371	0.670301	0.774622	0.85085	0.953928	0.984511	0.975674	0.942867	0.87969	0.869276	0.794485	0.769192	0.766804	0.804186	0.807915	0.862147	0.881666	0.89201	0.904301	0.898388	0.899626	0.914909	0.932648	0.939795	0.973792	1.00076	1.02798	1.06953	1.10503	1.1261	1.1455	1.16292	1.14919	1.14363	1.11603	1.09502
35	1.25665	1.26928	1.28329	1.28669	1.30988	1.30357	1.32891	1.3772	1.45064	1.5871	1.45483	1.31551	1.13035	0.914783	0.664191	0.667045	0.669113	0.709941	0.773232	0.779379	0.805836	0.814346	0.815955	0.830262	0.849509	0.843631	0.853252	0.869886	0.891263	0.912751	0.952099	1.00743	1.06684	1.10176	1.12989	1.16072	1.17622	1.17382	1.16228	1.16866	1.16901	1.16578	1.16985	1.18367	1.17669	1.1818	1.1154	1.07609	0.988586
36	1.40367	1.37959	1.35702	1.31818	1.29366	1.2887	1.29495	1.31729	1.32391	1.34576	1.42	1.29184	1.15972	1.06304	0.955139	0.823984	0.878594	0.925973	0.962509	1.00047	0.998303	1.00439	1.01325	1.02548	1.0404	1.06581	1.08525	1.10137	1.11406	1.10574	1.08391	1.0827	1.09497	1.12388	1.16335	1.22452	1.27245	1.29808	1.29599	1.29414	1.25214	1.21979	1.20325	1.20392	1.21183	1.24841	1.27613	1.30188	1.32638
37	1.40471	1.43642	1.45505	1.45669	1.47282	1.49236	1.49148	1.46848	1.45146	1.46453	1.3281	1.1593	1.01088	0.865617	0.711171	0.750777	0.820052	0.890066	0.951239	0.980506	0.957536	0.931791	0.903024	0.882833	0.870005	0.874521	0.859451	0.845723	0.844818	0.853555	0.861527	0.910972	0.977621	1.02158	1.07339	1.11318	1.13098	1.12389	1.11992	1.08393	1.028	0.964904	0.929026	0.889654	0.914503	0.997563	1.05732	1.10991	1.16509
38	1.40471	1.43642	1.45505	1.45669	1.47282	1.49236	1.49148	1.46848	1.45146	1.46453	1.3281	1.1593	1.01088	0.862324	0.695743	0.69102	0.729661	0.790966	0.847635	0.896375	0.931952	0.95742	0.95692	0.975735	0.996597	1.02045	1.04007	1.06638	1.09306	1.09257	1.09512	1.11083	1.14114	1.1673	1.21495	1.24826	1.25092	1.21732	1.19123	1.15814	1.13589	1.13337	1.15629	1.18	1.19498	1.18984	1.17513	1.14901	1.09936
39	1.11163	1.15115	1.21169	1.26967	1.38723	1.50776	1.60755	1.71261	1.78118	1.82609	1.92671	1.91406	1.68138	1.47222	1.23747	0.945038	0.749482	0.79677	0.848063	0.920425	0.983363	1.01893	1.03767	1.0373	1.0293	1.00975	1.0056	1.00202	1.01701	1.03402	1.06995	1.10089	1.11794	1.12867	1.15346	1.17228	1.19614	1.2388	1.2752	1.29731	1.31596	1.33714	1.36625	1.40938	1.4753	1.54455	1.59111	1.60892	1.60311
40	1.34877	1.43811	1.51078	1.53162	1.53623	1.5324	1.48443	1.42683	1.40867	1.41703	1.42901	1.44041	1.31648	1.17669	0.970002	0.775632	0.640776	0.652574	0.758574	0.857436	0.957882	1.05069	1.11205	1.03212	0.983591	0.925564	0.859024	0.827789	0.830385	0.837079	0.839093	0.842725	0.853968	0.848686	0.815249	0.780563	0.773547	0.737202	0.740881	0.803209	0.88147	0.923151	0.978049	1.01676	1.03475	1.05166	1.0793	1.11358	1.14287
41	1.35438	1.38325	1.40296	1.42314	1.45852	1.48185	1.48193	1.47518	1.47883	1.47313	1.43381	1.43901	1.4715	1.33459	1.18292	1.05299	0.862857	0.695915	0.72798	0.79639	0.866673	0.962232	1.00599	1.02495	0.989744	0.970609	0.945655	0.922769	0.903087	0.909166	0.902116	0.923251	0.956546	1.01365	1.04147	1.06767	1.08592	1.08703	1.0657	1.08232	1.11272	1.14822	1.19315	1.20175	1.20464	1.20708	1.18257	1.14303	1.11946
42	1.67806	1.64041	1.61294	1.57091	1.5379	1.5011	1.4744	1.46262	1.4709	1.49141	1.51537	1.5502	1.58947	1.64972	1.49024	1.32805	1.1626	1.03649	0.891922	0.994911	1.14247	1.28824	1.3426	1.37894	1.37749	1.3523	1.33771	1.34997	1.36903	1.3501	1.31926	1.28033	1.28956	1.30577	1.3632	1.42033	1.45469	1.44608	1.42055	1.39017	1.3563	1.33379	1.31991	1.31019	1.29887	1.29303	1.28436	1.27406	1.26462
43	1.67806	1.64041	1.61294	1.57091	1.5379	1.5011	1.4744	1.46262	1.4709	1.49141	1.51537	1.5502	1.58947	1.64972	1.49024	1.32805	1.13131	0.970124	0.811756	0.881158	1.00078	1.15527	1.25784	1.32281	1.36719	1.36995	1.36205	1.36301	1.35332	1.32878	1.32825	1.32354	1.31321	1.32021	1.34237	1.35475	1.37102	1.39158	1.39606	1.38481	1.36427	1.34012	1.32964	1.33521	1.35437	1.38018	1.41566	1.42934	1.42637
44	1.40641	1.39353	1.44873	1.50935	1.54533	1.60273	1.66731	1.65546	1.63478	1.6796	1.65764	1.62656	1.63247	1.53096	1.31983	1.14954	0.955896	0.791224	0.775771	0.849678	0.929901	1.02756	1.07264	1.07993	1.05708	1.0372	1.01343	1.00383	0.999278	0.989629	0.977986	0.972751	1.0124	1.05931	1.12607	1.18069	1.2229	1.19682	1.17823	1.17201	1.1844	1.21035	1.26111	1.27177	1.25248	1.21867	1.17999	1.1471	1.1387
45	1.5296	1.53149	1.55995	1.61776	1.64494	1.68123	1.69241	1.5609	1.38206	1.20697	1.047	0.941371	0.97654	1.03526	1.10014	1.1275	1.11432	1.10035	1.09103	1.0826	1.07307	1.06673	1.04785	1.03899	1.02891	1.02283	1.0172	1.02642	1.05946	1.0637	1.07476	1.09854	1.12306	1.13252	1.18134	1.23001	1.26637	1.2829	1.29458	1.30718	1.31181	1.31149	1.314	1.3173	1.30534	1.28732	1.27178	1.26152	1.25185
46	1.32221	1.34894	1.38135	1.42101	1.4643	1.51049	1.52272	1.51731	1.51531	1.43042	1.25844	1.09758	0.946556	0.823147	0.802492	0.833304	0.860287	0.884075	0.872555	0.839368	0.874476	0.915552	0.950184	0.995497	1.02772	1.01953	1.03639	1.06371	1.08533	1.0918	1.09974	1.09902	1.09882	1.09737	1.12555	1.14293	1.15097	1.15623	1.19004	1.22278	1.27402	1.33044	1.36985	1.38264	1.38811	1.38775	1.36961	1.36921	1.37292
47	1.32221	1.34894	1.38135	1.42101	1.4643	1.51049	1.52272	1.51731	1.51531	1.43042	1.25844	1.09758	0.957835	0.859895	0.86064	0.950659	1.041	1.12077	1.15811	1.16103	1.15556	1.13739	1.10053	1.06171	1.02132	0.983621	0.972285	0.980474	0.992474	1.00734	1.03552	1.08749	1.17838	1.25992	1.37025	1.44245	1.46449	1.44826	1.43258	NaN	1.39071	1.37564	1.3644	1.36911	1.35499	1.34778	1.35742	1.36505	1.3509
48	1.44865	1.4482	1.43432	1.42272	1.41963	1.40685	1.42012	1.42991	1.44818	1.42487	1.30922	1.16338	1.02116	0.890981	0.811232	0.838708	0.86242	0.881422	0.903111	0.918662	0.931879	0.947827	0.960989	0.972862	0.984052	0.99106	1.01328	1.03405	1.05122	1.03682	1.02243	1.00416	0.975686	0.962225	0.983955	1.0033	1.00049	1.01446	1.0098	0.999138	0.998304	1.00764	1.01085	1.0083	0.999854	0.983877	0.960802	0.936237	0.908466
49	1.20895	1.23611	1.32107	1.41798	1.50139	1.57938	1.59694	1.57759	1.54584	1.52388	1.33413	1.17327	1.01624	0.869185	0.741382	0.818346	0.872137	0.910549	0.940853	0.952045	0.918792	0.908821	0.908885	0.922724	0.934584	0.946893	0.960161	0.986101	1.00572	1.02156	1.03986	1.07141	1.10962	1.14342	1.17751	1.21079	1.23275	1.25571	1.28421	1.30458	1.32804	1.34424	1.34607	1.32645	1.31961	1.31007	1.29314	1.27716	1.26103
50	1.40363	1.41614	1.44539	1.4834	1.52894	1.57413	1.63306	1.67347	1.7188	1.75484	1.80759	1.62921	1.44731	1.25872	1.11689	0.983147	1.05883	1.12096	1.16382	1.13972	1.06999	0.990802	0.90723	0.840398	0.793717	0.76302	0.76975	0.812768	0.867776	0.912471	0.961935	1.0076	1.0396	1.05404	1.07043	1.07655	1.07838	1.07926	1.08089	1.09172	1.11037	1.1247	1.14223	1.17381	1.21779	1.26844	1.32395	1.37558	1.40659
CDK4/6i
Cell #
1	1.38938	1.37883	1.39759	1.40694	1.43489	1.45304	1.47433	1.52451	1.37373	1.21438	1.02957	0.874698	0.697431	0.746606	0.782642	0.832281	0.850482	0.861428	0.83565	0.825077	0.823747	0.826586	0.830165	0.855887	0.898748	0.953379	1.0426	1.13028	1.20908	1.22765	1.1976	1.09756	0.976644	0.842634	0.740545	0.673384	0.634005	0.614807	0.608199	0.624392	0.64986	0.66545	0.671944	0.693076	0.703922	0.72274	0.746028	0.7681	0.771399
2	1.73827	1.73773	1.74733	1.75979	1.76123	1.77187	1.79063	1.82733	1.6323	1.44816	1.24018	1.06275	0.910502	0.979909	1.029	1.07528	1.11055	1.10827	1.12047	1.13761	1.15134	1.15067	1.14498	1.13117	1.1226	1.11339	1.11294	1.12297	1.13013	1.11289	1.07587	1.02257	0.947156	0.867559	0.808841	0.776016	0.747149	0.736416	0.725779	0.71663	0.704586	0.696746	0.691134	0.693661	0.697715	0.696425	0.699501	0.697368	0.698139
3	1.73827	1.73773	1.74733	1.75979	1.76123	1.77187	1.79063	1.82733	1.6323	1.44816	1.21492	1.04046	0.864224	0.923283	0.983359	1.05987	1.08885	1.10341	1.13657	1.15009	1.16652	1.19405	1.21205	1.19713	1.20983	1.22433	1.23285	1.25317	1.2756	1.2504	1.19817	1.1252	1.03661	0.939928	0.869101	0.819203	0.777541	0.749771	0.738263	0.737036	0.745215	0.761333	0.777243	0.78542	0.794436	0.798013	0.806313	0.811037	0.821389
4	1.71559	1.76555	1.86131	1.91366	1.93419	1.88211	1.82275	1.80825	1.59664	1.38287	1.19005	1.07946	0.94076	1.03115	1.1225	1.21638	1.26311	1.2907	1.29031	1.27503	1.21398	1.16637	NaN	NaN	1.10031	1.07027	1.0557	1.09133	1.10284	1.09707	1.03734	0.967446	0.89481	0.843312	0.827039	0.820963	0.809639	0.799149	0.779324	0.766077	0.780992	0.799644	0.815102	0.8128	0.789597	0.754708	0.720164	0.71664	0.717591
5	1.69982	1.70425	1.70153	1.71621	1.72158	1.74963	1.7639	1.8118	1.79925	1.60341	1.39568	1.21213	1.03362	0.93301	1.02397	1.10449	1.17117	1.20351	1.18652	1.14974	1.10973	1.06973	1.04127	1.03786	1.05911	1.09109	1.12457	1.15368	1.168	1.14867	1.08623	0.996516	0.898089	0.793109	0.701094	0.641726	0.605735	0.586658	0.583527	0.589886	0.60752	0.624737	0.637063	0.64127	0.647304	0.648035	0.643818	0.634402	0.626904
6	1.6591	1.64179	1.63251	1.59761	1.56261	1.50866	1.47403	1.47737	1.48502	1.52756	1.41516	1.28001	NaN	1.05778	0.8894	0.720553	0.757149	0.826901	0.961734	1.04768	1.10035	1.14684	1.14847	1.14588	1.12605	1.11661	1.09541	1.10249	1.1314	1.15425	1.14065	1.09899	1.0331	0.92812	0.833767	0.786406	0.751131	0.728882	0.721222	0.721324	0.706676	0.711391	0.711834	0.721807	0.735579	0.761882	0.789335	0.816868	0.833298
7	1.33325	1.35992	1.39047	1.40963	1.44002	1.45011	1.43775	1.44133	1.46411	1.48441	1.53381	1.39084	1.22138	1.07838	0.927862	0.74427	0.777283	0.847307	0.870191	0.892491	0.931802	0.963035	0.972669	0.994978	1.00895	1.0187	1.02736	1.04227	1.06018	1.05255	1.01057	0.944358	0.853547	0.752207	0.666856	0.605375	0.553281	0.514176	0.486468	0.468463	0.45803	0.461881	0.478814	0.492354	0.510256	0.525289	0.536168	0.547816	0.566701
8	1.2214	1.24725	1.21219	1.22038	1.22657	1.24544	1.28305	1.36881	1.42788	1.50884	1.60478	1.64671	1.48259	1.32702	1.16827	0.984697	0.847854	0.909929	0.972508	1.03302	1.09063	1.11304	1.09917	1.07034	1.03313	0.996821	0.976442	0.98547	1.00909	1.01573	0.986501	0.936306	0.86924	0.784911	0.720164	0.683625	NaN	0.661861	0.660365	0.668381	0.672753	0.679411	0.686738	0.681805	0.677197	0.673017	0.675563	0.680787	0.6848
9	1.62029	1.63469	1.6521	1.68199	1.70755	1.73799	1.72273	1.6906	1.63485	1.57942	1.50882	1.48087	1.42128	1.26263	1.10737	0.993432	0.868875	0.836442	0.917147	0.970998	0.977094	0.974654	0.917724	0.86057	0.837207	0.833278	0.844152	0.869787	0.912541	0.937785	0.928276	0.893744	0.838883	0.753114	0.681664	0.637428	0.605251	0.579345	0.563761	0.557461	0.569125	0.585366	0.607839	0.626152	0.640307	0.640471	0.636148	0.638078	0.649203
10	1.6067	1.62363	1.6387	1.65656	1.66834	1.69343	1.71057	1.72372	1.7373	1.74878	1.77012	1.80812	1.64102	1.45473	1.25269	1.06792	0.921726	1.00738	1.12539	1.24253	1.3115	1.32893	1.30509	1.24747	1.19909	1.1622	1.1213	1.08586	1.0609	1.03148	0.978664	0.91966	0.848293	0.764292	0.685964	0.636996	0.599498	0.575907	0.560173	0.551959	0.550178	0.548995	0.550277	0.558474	0.565197	0.568143	0.572808	0.580001	0.581015
11	1.6067	1.62363	1.6387	1.65656	1.66834	1.69343	1.71057	1.72372	1.7373	1.74878	1.77012	1.80812	1.64102	1.45473	1.25269	1.04411	0.89579	0.982203	1.08897	1.18319	1.24843	1.2398	1.19148	1.1232	1.08326	1.06728	1.05458	1.07237	1.09989	1.09358	1.04732	0.989734	0.885328	0.765614	0.668106	0.609098	0.560797	0.536294	0.521161	0.516428	0.514529	0.518539	0.518624	0.521979	0.527887	0.534982	0.544334	0.558639	0.572952
12	1.70335	1.69803	1.66104	1.6089	1.54043	1.48962	1.45072	1.40243	1.33922	1.31886	1.33173	1.3683	1.52434	1.4608	1.36936	1.25021	1.10546	0.895881	0.942803	1.01561	1.09115	1.14241	1.17096	1.18598	1.18736	1.2013	1.2209	1.23703	1.25601	1.24476	1.16967	1.07555	0.969655	0.851567	0.75322	0.698914	0.67107	0.667196	0.675264	0.654178	0.654208	0.647491	0.6482	0.677754	0.736653	0.775222	0.806232	0.837644	0.838108
13	1.36129	1.36124	1.35302	1.31888	1.28865	1.25377	1.23523	1.24883	1.2801	1.29252	1.30731	1.33047	1.35464	1.22534	1.13294	1.03542	0.944493	0.882459	1.00617	1.11696	1.19935	1.2575	1.25599	1.21832	1.17317	1.12666	1.09374	1.09406	1.10528	1.09122	1.06203	1.0123	0.931554	0.829832	0.736059	0.676516	0.630404	0.60077	0.587834	0.579483	0.578849	0.576149	0.576236	0.578139	0.588516	0.58854	0.594252	0.59224	0.589304
14	1.34192	1.38169	1.40131	1.4563	1.53418	1.58641	1.61953	1.62861	1.60591	1.58442	1.58293	1.59844	1.67822	1.6751	1.5235	1.3613	1.19346	1.03561	1.01378	1.11946	1.21184	1.29148	1.31041	1.26888	1.2297	1.23212	1.25482	1.27561	1.33609	1.36	1.29414	1.18597	1.06496	0.899725	0.768847	0.694961	0.646856	0.621132	0.605532	0.599364	0.596572	0.605744	0.6075	0.614267	0.615034	0.609937	0.601801	0.602711	0.59781
15	1.53975	1.49825	1.44891	1.41775	1.36008	1.33874	1.34939	1.35205	1.36117	1.4141	1.45579	1.49855	1.55576	1.60364	1.45338	1.29893	1.11705	0.955876	0.818522	0.892972	0.967328	1.04616	1.09076	1.10906	1.12204	1.14645	1.17016	1.20388	1.24901	1.24335	1.18102	1.09512	0.983706	0.864398	0.757291	0.704971	0.678423	0.669781	0.668652	0.673053	0.664952	0.663097	0.662273	0.657162	0.654091	0.644323	0.634618	0.632696	0.637381
16	1.53975	1.49825	1.44891	1.41775	1.36008	1.33874	1.34939	1.35205	1.36117	1.4141	1.45579	1.49855	1.55576	1.60364	1.45338	1.29893	1.13502	0.986803	0.916032	1.04535	1.16825	1.25297	1.29008	1.24518	1.17186	1.10529	1.07177	1.06284	1.08214	1.09303	1.07344	1.02547	0.966066	0.876004	0.784674	0.713674	0.668477	0.635616	0.616267	0.608561	0.605933	0.603293	0.596828	0.588056	0.57873	0.567025	0.558039	0.551627	0.551347
17	1.57842	1.60517	1.64106	1.68538	1.7065	1.71029	1.72807	1.70561	1.69754	1.69102	1.69303	1.67038	1.71186	1.52702	1.3451	1.15822	0.994893	0.87745	0.959685	1.01386	1.07688	1.12354	1.09416	1.06066	1.05554	1.04632	1.04346	1.0379	1.04462	1.03013	0.990862	0.932999	0.85035	0.741736	0.645278	0.581219	0.538999	0.523337	0.523224	0.530684	0.542163	0.551351	0.55841	0.57478	0.587382	0.599502	0.604141	0.607018	0.603695
18	1.34192	1.38169	1.40131	1.4563	1.53418	1.58641	1.61953	1.62861	1.60591	1.58442	1.58293	1.59844	1.67822	1.6751	1.5235	1.3613	1.19478	1.0163	0.970195	1.07209	1.16538	1.24789	1.28968	1.26292	1.22438	1.20233	1.19656	1.19617	1.21649	1.19844	1.14145	1.05212	0.957188	0.844846	0.762426	0.703087	0.661982	0.626791	0.604561	0.593246	0.591964	0.602531	0.620722	0.641346	0.65836	0.665018	0.668947	0.670656	0.673164
19	1.41302	1.41645	1.47829	1.51637	1.56702	1.61438	1.66693	1.50135	1.3566	1.20286	1.05599	0.943994	1.02551	1.12245	1.20485	1.24209	1.23659	1.21024	1.17186	1.15658	1.15112	1.15297	1.17185	1.19343	1.21885	1.24931	1.26988	1.28003	1.28819	1.26689	1.19759	1.11323	1.01038	0.901683	0.800341	0.740537	0.707574	0.69085	0.676617	0.672851	0.672779	0.671172	0.672591	0.682212	0.695381	0.715613	0.729012	0.746783	0.76884
20	1.62308	1.57374	1.51736	1.4667	1.4533	1.47824	1.49232	1.38921	1.28616	1.17947	1.07856	1.03425	1.12523	1.2082	1.25805	1.25403	1.21427	1.16163	1.11543	1.09352	1.10075	1.09835	1.09392	1.08033	1.06491	1.04806	1.0447	1.06168	1.08843	1.09035	1.04698	0.974657	0.874449	0.770083	0.689712	0.655469	0.643975	0.635786	0.624448	0.62068	0.61471	0.608059	0.605553	0.614399	0.615456	0.616087	0.617235	0.622917	0.622067
21	1.47486	1.53082	1.5287	1.5057	1.46764	1.43743	1.42648	1.47375	1.37448	1.27416	1.1757	1.04156	0.909765	0.952838	0.996417	1.02663	1.04448	1.02772	0.996847	0.967177	0.945643	0.932089	0.93925	0.952713	0.95589	0.960044	0.956191	0.960446	0.943519	0.943387	0.922953	0.906044	0.842138	0.798825	0.745453	0.727468	0.698024	0.700459	0.684896	0.689263	0.67266	0.676741	0.664843	0.66841	0.658822	0.666428	0.66141	0.662412	0.661006
22	1.51105	1.48649	1.4899	1.53295	1.61	1.7158	1.78516	1.83997	1.82572	1.60255	1.35255	1.15013	1.00785	0.97079	1.09511	1.13071	1.16416	1.14433	1.06061	0.997345	1.00457	0.97196	0.93866	0.912212	0.888414	0.884353	0.915315	0.962206	1.01158	1.02641	0.99886	0.936461	0.853503	0.767205	0.701614	0.671958	0.650423	0.637197	0.618635	0.60812	0.59996	0.597367	0.590719	0.584465	0.581457	0.575746	0.564523	0.560188	0.554816
23	1.14962	1.20939	1.23062	1.28154	1.33188	1.38444	1.40029	1.42266	1.45922	1.35596	1.20188	1.0361	0.883505	0.724933	0.723947	0.800904	0.90015	0.970434	1.01598	1.01316	0.970356	0.929146	0.882892	0.854296	0.866376	0.899134	0.931236	0.945469	0.960684	0.925805	0.859651	0.784369	0.713602	0.631507	0.584001	0.548113	0.513971	0.495746	0.482874	0.48201	0.489751	0.503993	0.523355	0.54367	0.553435	0.558871	0.557616	0.553581	0.549954
24	1.24729	1.28571	1.33309	1.39462	1.45765	1.51556	1.52801	1.53126	1.52052	1.53012	1.39736	1.24995	1.13686	1.0427	0.94948	1.00243	1.07143	1.1187	1.13913	1.13133	1.12603	1.11501	1.09979	1.09221	1.09801	1.10088	1.12428	1.14338	1.16995	1.16171	1.12079	1.04457	0.954221	0.849021	0.762832	0.695296	0.652645	0.625009	0.608402	0.599037	0.602319	0.610277	0.623701	0.631993	0.644305	0.657387	0.669799	0.681284	0.691095
25	1.24729	1.28571	1.33309	1.39462	1.45765	1.51556	1.52801	1.53126	1.52052	1.53012	1.39736	1.24995	1.13622	1.03851	0.94187	1.01575	1.10761	1.16946	1.19367	1.18047	1.13825	1.10178	1.07202	1.07175	1.09284	1.11596	1.13505	1.15789	1.1759	1.16834	1.12426	1.0665	0.998992	0.921247	0.859478	0.82814	0.812709	0.805171	0.80279	0.79904	0.798042	0.795757	0.789582	0.78279	0.779509	0.781017	0.782963	0.784599	0.789586
26	1.43379	1.50167	1.52383	1.57561	1.59189	1.52931	1.50692	1.56193	1.58775	1.61503	1.68454	1.52521	1.31241	1.1367	1.01298	0.935232	1.04626	1.15519	1.19926	1.21334	1.1839	1.14047	1.10152	1.09167	1.07756	1.08452	1.10952	1.1524	1.17217	1.17772	1.12811	1.03836	0.926178	0.817825	0.719185	0.65846	0.624427	0.605783	0.596558	0.592884	0.593675	0.596219	0.598211	0.605289	0.625037	0.642027	0.664121	0.688342	0.705624
27	1.43379	1.50167	1.52383	1.57561	1.59189	1.52931	1.50692	1.56193	1.58775	1.61503	1.68454	1.52521	1.31241	1.11737	0.933673	0.814084	0.882413	0.952701	1.00502	1.04623	1.05329	1.05851	1.06632	1.069	1.09017	1.08535	1.07332	1.0776	1.08651	1.07466	1.04483	0.994182	0.921881	0.836887	0.769014	0.721714	0.690361	0.662532	0.645061	0.63375	0.623563	0.618534	0.623733	0.628459	0.632084	0.633653	0.636235	0.632684	0.623092
28	1.74037	1.76683	1.76367	1.75347	1.73901	1.70711	1.67302	1.65772	1.64535	1.63449	1.66189	1.48664	1.30959	1.14275	0.958329	0.816822	0.911551	1.02201	1.11484	1.22809	1.27129	1.27636	1.26227	1.2495	1.23033	1.21541	1.21107	1.20409	1.21034	1.19509	1.14789	1.07339	0.991289	0.901214	0.830775	0.790239	0.766128	0.76133	0.758597	0.764331	0.775161	0.788368	0.796799	0.802608	0.807249	0.810434	0.812072	0.810998	0.805987
29	1.54892	1.58129	1.60077	1.60455	1.59012	1.55418	1.50876	1.49885	1.51422	1.54334	1.56695	1.61979	1.45907	1.29194	1.12375	1.02228	0.921634	0.994508	1.05419	1.10242	1.09509	1.03465	0.988604	0.957424	0.950326	0.937611	0.943313	0.973434	1.00845	1.02034	1.00425	0.98125	0.917109	0.833641	0.753502	0.707303	0.671441	0.657806	0.659767	0.665514	0.672532	0.686429	0.691614	0.697971	0.712297	0.728746	0.725401	0.731791	0.737344
30	1.58435	1.6484	1.68838	1.71255	1.70837	1.68641	1.63863	1.59073	1.5757	1.59864	1.65303	1.69994	1.62253	1.4522	1.25477	1.02241	0.854666	0.841463	0.897653	0.948273	1.00516	1.02105	1.01297	1.00851	1.00339	1.02531	1.06168	1.08809	1.12437	1.13977	1.10501	1.03454	0.94804	0.845537	0.758553	0.695481	0.643809	0.606444	0.572199	0.551817	0.531883	0.524157	0.524589	0.527814	0.526351	0.527169	0.525588	0.522366	0.524848
31	1.30534	1.30367	1.32258	1.34477	1.38614	1.38677	1.35672	1.32134	1.29976	1.27063	1.2492	1.28583	1.3288	1.29107	1.16612	1.04786	0.91531	0.780342	0.742237	0.784739	0.824922	0.842072	0.87409	0.901129	0.941888	0.986735	1.02529	1.05412	1.06926	1.05307	1.01051	0.948155	0.864033	0.756708	0.661075	0.583227	0.525331	0.486897	0.470363	0.467653	0.470408	0.477872	0.484461	0.487905	0.486738	0.489162	0.49126	0.498284	0.50008
32	1.42619	1.42832	1.41918	1.4157	1.43022	1.46378	1.53677	1.41693	1.30709	1.16892	1.03469	0.899323	0.975563	1.05171	1.1479	1.20602	1.20266	1.1758	1.14979	1.11713	1.09161	1.09659	1.1003	1.12464	1.15025	1.18792	1.2159	1.25482	1.27574	1.27179	1.22223	1.14312	1.05408	0.951431	0.863373	0.808809	0.77171	0.745719	0.726879	0.71614	0.706907	0.70367	0.709202	0.728756	0.756101	0.779122	0.802511	0.824365	0.839786
33	1.56925	1.57908	1.63065	1.674	1.72036	1.80383	1.88736	1.68754	1.47452	1.26951	1.02203	0.788685	0.826669	0.894446	0.96507	1.04901	1.08424	1.09819	1.1011	1.0991	1.08077	1.04071	0.970741	0.919463	0.885105	0.914724	0.997767	1.11633	1.20038	1.22063	1.15867	1.05838	0.945824	0.805506	0.712478	0.661912	0.620531	0.591614	0.611818	0.637775	0.664001	0.703894	0.749632	0.776661	0.79498	0.797736	0.795726	0.785495	0.781149
34	1.1683	1.22531	1.27545	1.31445	1.35156	1.41502	1.45134	1.53296	1.40908	1.26948	1.10493	0.960187	NaN	0.758639	0.789918	0.798372	0.806754	0.832993	0.857689	0.862634	0.86364	0.873344	0.862532	0.823979	0.817983	0.819152	0.836762	0.861908	0.915475	0.961778	0.983914	0.968752	0.917305	0.860912	0.785672	0.739847	0.712187	0.705402	0.709646	0.717182	0.720368	0.725402	0.737716	0.746132	0.755033	0.765784	0.773984	0.783733	0.7968
35	1.1683	1.22531	1.27545	1.31445	1.35156	1.41502	1.45134	1.53296	1.40908	1.26948	1.12003	0.986361	NaN	0.786518	0.820691	0.837185	0.868115	0.896078	0.929118	0.945041	0.944575	0.917556	0.90775	0.897454	0.910053	0.960037	0.994421	1.02453	1.06492	1.0568	1.00566	0.966776	0.910831	0.840242	0.786976	0.743372	0.707143	0.677742	0.657731	0.655362	0.672316	0.68334	0.692896	0.710171	0.72035	0.716529	0.717341	0.719881	0.718555
36	1.27565	1.24752	1.24961	1.27814	1.31368	1.35691	1.40806	1.47371	1.53571	1.47108	1.3402	1.19159	0.987842	0.806125	0.76068	0.795685	0.815998	0.861483	0.854701	0.846039	0.825991	0.823442	0.849481	0.882569	0.925118	0.979194	1.05833	1.12701	1.19311	1.20121	1.18346	1.11623	1.02782	0.940165	0.881693	0.827662	0.797946	0.781026	0.782399	0.785283	0.802931	0.817541	0.828155	NaN	NaN	NaN	NaN	0.840763	0.860844
37	1.27565	1.24752	1.24961	1.27814	1.31368	1.35691	1.40806	1.47371	1.53571	1.47108	1.3402	1.18917	0.935358	0.733433	0.686203	0.712283	0.733899	0.83853	0.870341	0.884873	0.896777	0.932504	0.995597	1.05777	1.09354	1.10826	1.0924	1.03097	0.998505	0.963566	0.93556	0.903084	0.874406	0.820845	0.775598	0.734886	0.720853	0.713236	0.71114	0.72143	0.738296	0.743873	0.755642	0.751425	0.74807	0.756257	0.764034	0.765709	NaN
38	1.26875	1.27377	1.31504	1.36636	1.42692	1.51273	1.58727	1.63972	1.49922	1.33515	1.14336	0.974241	0.822215	0.875736	0.946549	1.02208	1.06637	1.08653	1.09386	1.08379	1.07136	1.07197	1.08621	1.09739	1.11021	1.13093	1.15146	1.16788	1.19849	1.19103	1.15943	1.10996	1.03304	0.925782	0.848103	0.785748	0.737728	0.705012	0.686178	0.679394	0.672947	0.665129	0.658074	0.654143	0.641792	0.634423	0.624307	0.616069	0.608574
39	1.28944	1.25146	1.23224	1.24103	1.26011	1.3081	1.34407	1.38323	1.41406	1.43391	1.30567	1.18045	1.05526	0.93565	0.879788	0.961751	1.06587	1.13891	1.18614	1.16116	1.13895	1.11165	1.1062	1.10876	1.14894	1.15046	1.15213	1.17446	1.21426	1.2049	1.19259	1.15035	1.07479	0.99123	0.917275	0.858624	0.818224	0.787535	0.775461	0.777099	0.79035	0.800346	0.819718	0.832012	0.839765	0.84226	0.841912	0.835549	0.83399
40	1.28944	1.25146	1.23224	1.24103	1.26011	1.3081	1.34407	1.38323	1.41406	1.43391	1.30567	1.18045	1.05114	0.898138	0.833963	0.91955	1.01179	1.11317	1.22508	1.25038	1.24345	1.23435	1.19364	1.16825	1.14782	1.13893	1.12187	1.12462	1.15073	1.15274	1.12007	1.0706	0.999329	0.904006	0.836949	0.793189	0.779771	0.780879	0.796956	0.806031	0.821777	0.816889	0.809384	0.79289	0.763638	0.745434	0.741065	0.740945	0.732909
41	1.76793	1.77139	1.77137	1.79465	1.78409	1.76394	1.73198	1.69519	1.63458	1.42653	1.22994	1.03118	0.842654	0.663739	0.691018	0.72388	0.799424	0.890968	0.98548	1.05814	1.1129	1.13779	1.12633	1.10803	1.10427	1.10087	1.09629	1.11519	1.1377	1.12957	1.08838	1.02863	0.958876	0.881118	0.813376	0.770083	0.741625	0.708309	0.681127	0.667229	0.676067	0.688555	0.703155	0.716794	0.723404	0.713813	0.704453	0.701685	0.701602
42	1.40284	1.47555	1.53998	1.5787	1.6006	1.5909	1.60016	1.60952	1.61268	1.59686	1.42806	1.25218	1.03413	0.864838	0.75453	0.822879	0.877001	0.975454	1.02061	1.02357	1.00725	0.986376	0.960491	0.936621	0.927275	0.929575	0.931406	0.93341	0.940845	0.914531	0.861653	0.80217	0.733092	0.652405	0.591969	0.551872	0.534597	0.521562	0.520589	0.524499	0.538646	0.547547	0.566752	0.586138	0.607132	0.61857	0.63209	0.64136	0.647729
43	1.49414	1.47675	1.46047	1.41694	1.39953	1.39196	1.40358	1.37918	1.38666	1.40861	1.41738	1.26877	1.13509	0.999943	0.849631	0.75704	0.81664	0.902988	0.995825	1.05595	1.02837	1.00166	0.943595	0.879561	0.84474	0.872634	0.895151	0.95073	1.00097	1.02548	0.98702	0.931574	0.84858	0.760392	0.683872	0.642877	0.617818	0.606203	0.602107	0.604883	0.609171	0.609209	0.619242	0.62347	0.628022	0.630571	0.635888	0.627127	0.63265
44	1.49414	1.47675	1.46047	1.41694	1.39953	1.39196	1.40358	1.37918	1.38666	1.40861	1.41738	1.26877	1.13509	0.987575	0.859362	0.792566	0.870344	0.940215	1.00823	1.00347	0.92613	0.845166	0.811154	0.78203	0.77468	0.788115	0.830955	0.862964	0.910938	0.929454	0.925264	0.871417	0.798172	0.705519	0.632851	0.579742	0.553495	0.535363	0.528724	0.540119	0.567999	0.595273	0.626662	0.659984	0.690739	0.707285	0.721831	0.731278	0.730818
45	1.58069	1.62459	1.6454	1.67524	1.67839	1.64019	1.58376	1.5337	1.49608	1.49603	1.51748	1.34693	1.19087	0.988244	0.768858	0.606071	0.67059	0.751126	0.864759	0.975374	1.02715	1.05131	1.05754	1.04608	1.03149	1.00095	0.990031	0.983581	0.993438	0.978861	0.960905	0.905133	0.838327	0.763995	0.708201	0.675954	0.659713	0.64565	0.639527	0.626827	0.607161	0.595525	0.602752	0.60508	0.618428	0.630137	0.642352	0.649585	0.659064
46	1.36758	1.4021	1.41615	1.41965	1.4361	1.46132	1.48559	1.51723	1.59084	1.66259	1.54905	1.37688	1.18668	0.974054	0.739595	0.688978	0.719064	0.804154	0.887942	0.972636	1.04638	1.08783	1.08283	1.05855	1.02271	0.988582	0.977274	0.980848	0.975601	0.979932	0.964276	0.918305	0.857021	0.794219	0.730481	0.687146	0.659236	0.627491	0.614552	0.615784	0.615368	0.614316	0.623846	0.631554	0.622716	0.6169	0.60887	0.598444	0.578973
47	1.36758	1.4021	1.41615	1.41965	1.4361	1.46132	1.48559	1.51723	1.59084	1.66259	1.54905	1.37688	1.18668	0.945217	0.733169	0.73384	0.794251	0.854719	0.92176	0.943256	0.930268	0.91507	0.915212	0.920305	0.929148	0.943946	0.951207	0.958252	0.980987	0.974791	0.938571	0.897034	0.841967	0.758268	0.68858	0.640827	0.605094	0.580391	0.563402	0.556262	0.551433	0.550187	0.545226	0.544452	0.549162	0.555655	0.557446	0.556851	0.560631
48	1.37859	1.44498	1.54701	1.63992	1.69792	1.7379	1.76318	1.74529	1.71045	1.72276	1.52825	1.33105	1.13487	0.938731	0.719476	0.767216	0.827336	0.873438	0.936549	0.98207	0.973834	0.952576	0.956551	0.967411	0.982561	1.00146	1.03311	1.06017	1.08664	1.09083	1.05474	0.997254	0.923864	0.837098	0.764483	0.724484	0.698123	0.682026	0.670047	0.662227	0.659922	0.660774	0.662675	0.668531	0.677592	0.682953	0.689086	0.69298	0.693077
49	1.37859	1.44498	1.54701	1.63992	1.69792	1.7379	1.76318	1.74529	1.71045	1.72276	1.52825	1.33105	1.13487	0.921018	0.701029	0.706775	0.730743	0.774592	0.834339	0.875423	0.913256	0.943024	0.94637	0.979178	0.996857	1.01334	1.03181	1.06555	1.08862	1.09083	1.0632	1.01638	0.942181	0.856594	0.789338	0.7451	0.715268	0.697676	0.690022	0.686766	0.681259	0.68066	0.687422	0.69247	0.693149	0.696703	0.695988	0.695386	0.694057
50	1.33125	1.30189	1.29046	1.31228	1.33506	1.30569	1.32512	1.35663	1.40969	1.51521	1.60962	1.65262	1.45611	1.23384	0.998816	0.8123	0.669767	0.749821	0.846993	0.912758	0.962122	0.957822	0.938915	0.928539	0.946127	0.963488	0.974146	0.976476	0.998618	0.991365	0.950585	0.920952	0.880168	0.813252	0.76132	0.734841	0.712678	0.710384	0.719097	0.725912	0.736791	0.751159	0.769733	0.783576	0.793058	0.787905	0.788946	0.789328	0.785193
CDK4/6i and CDK2i
Cell #
1	1.50413	1.53335	1.56305	1.58566	1.61356	1.61659	1.63431	1.51633	1.36922	1.22334	1.08363	0.961025	0.986053	1.04179	1.09011	1.13509	1.13416	1.12647	1.12386	1.1293	1.12711	1.13167	1.12968	1.13924	1.14378	1.15895	1.17768	1.1953	1.18877	1.18235	1.11878	1.01744	0.919578	0.816937	0.707185	0.642151	0.610877	0.581096	0.555734	0.541465	0.533014	0.512878	0.492314	0.491609	0.490075	0.487271	0.493253	0.494958	0.488295
2	1.50413	1.53335	1.56305	1.58566	1.61356	1.61659	1.63431	1.51633	1.36922	1.22563	1.0937	0.970092	0.998154	1.05979	1.11239	1.15099	1.15541	1.15198	1.142	1.1453	1.1456	1.13674	1.12249	1.12181	1.11572	1.10654	1.1235	1.13686	1.14868	1.14706	1.10962	1.02715	0.93427	0.824221	0.713525	0.649743	0.601293	0.568236	0.547912	0.536163	0.54073	0.532755	0.51888	0.507131	0.502156	0.469274	0.465774	0.464532	0.470396
3	1.62138	1.64084	1.70989	1.79236	1.85005	1.8742	1.8614	1.81788	1.59757	1.39129	1.1981	1.03606	0.922471	1.01913	1.06414	1.10251	1.13018	1.11628	1.06508	1.07325	1.07678	1.09002	1.11465	NaN	1.17536	1.21931	1.25315	NaN	1.20183	NaN	1.11235	NaN	0.987672	0.841864	0.701025	0.626595	0.564214	0.516895	0.492386	0.475118	0.455738	0.450323	0.444265	0.438025	0.42836	0.427633	0.420988	0.419191	0.41694
4	1.92068	1.96147	1.9837	1.95454	1.90055	1.86119	1.80285	1.76206	1.54051	1.34326	1.11406	0.906337	0.708854	0.786452	0.866142	0.943695	1.02226	1.08762	1.09099	1.08251	1.07589	1.05968	1.0313	1.00409	0.983559	0.979054	0.99519	1.016	1.03013	1.02363	0.976852	0.898652	0.807027	0.707678	0.625986	0.567963	0.52966	0.499888	0.479647	0.470251	0.464048	0.4601	0.459653	0.457291	0.457001	0.461199	0.466943	0.472307	0.479855
5	1.92068	1.96147	1.9837	1.95454	1.90055	1.86119	1.80285	1.76206	1.54051	1.34326	1.11406	0.903505	0.745974	0.838846	0.923645	1.0123	1.08989	1.0976	1.06821	1.05173	1.031	1.01854	1.00028	0.990618	0.979386	0.966669	0.952763	0.969151	0.985193	0.97649	0.938269	0.88768	0.808936	0.708012	0.62707	0.577863	0.54207	0.51288	0.491739	0.470183	0.449153	0.433469	0.421611	0.415003	0.416427	0.424006	0.433835	0.435991	0.437996
6	1.4294	1.39742	1.37363	1.35457	1.36691	1.36252	1.38931	1.39298	1.40468	1.40354	1.4263	1.42794	1.31681	1.20288	1.0954	0.971159	0.888703	0.930105	0.969057	1.00377	1.03126	1.03019	1.0285	1.0218	1.01347	1.02193	1.019	1.01764	1.01634	0.996366	0.926909	0.847746	0.753756	0.64951	0.559176	0.502059	0.461383	0.429161	0.40647	0.391664	0.380966	0.372285	0.365393	0.357159	0.354542	0.355055	0.36454	0.374387	0.383243
7	1.56776	1.59719	1.61221	1.60152	1.58777	1.54346	1.47767	1.41635	1.36551	1.34014	1.34286	1.35463	1.25541	1.1536	1.03347	0.878138	0.719241	0.71422	0.747205	0.774078	0.83188	0.881457	0.884992	0.849984	0.837513	0.835371	0.848655	0.873003	0.906661	0.892325	0.839215	0.757495	0.662005	0.556134	0.477251	0.4271	0.395951	0.376466	0.363386	0.352037	0.342886	0.33551	0.324896	0.316116	0.309562	0.303834	0.298313	0.298122	0.296703
8	1.3183	1.3237	1.33821	1.35259	1.34589	1.34311	1.35431	1.36938	1.41761	1.50429	1.59594	1.67176	1.75147	1.59011	1.40196	1.21731	1.0674	0.942985	1.03369	1.12135	1.19124	1.22983	1.22468	1.21925	1.22509	1.22982	1.23741	1.22937	1.21432	1.17379	1.10233	0.997018	0.886449	0.763751	0.652637	0.568925	0.515328	0.478164	0.451045	0.431374	0.418532	0.407548	0.398095	0.39137	0.38748	0.384817	0.387138	0.385735	0.385265
9	1.3183	1.3237	1.33821	1.35259	1.34589	1.34311	1.35431	1.36938	1.41761	1.50429	1.59594	1.67176	1.75147	1.59011	1.40196	1.20241	1.03485	0.88209	0.939813	0.980156	1.02534	1.05365	1.03964	1.03099	1.04148	1.04669	1.07227	1.0789	1.05565	1.00096	0.913591	0.785397	0.68404	0.600785	0.547235	0.521139	0.498902	0.476041	0.462322	0.460438	0.465603	NaN	NaN	NaN	NaN	NaN	0.478245	0.488995	0.491934
10	1.09507	1.12344	1.14943	1.20697	1.26306	1.30638	1.35856	1.40242	1.42763	1.43643	1.4677	1.50403	1.38989	1.25301	1.13192	0.978473	0.855352	0.895955	0.924966	0.944036	0.952036	0.92046	0.852136	0.807845	0.786189	0.798917	0.818901	0.909935	0.99692	1.04246	1.02033	0.963415	0.846844	0.719722	0.607008	0.5386	0.48571	0.436826	0.410241	0.394532	0.3875	0.382458	0.383887	0.379695	0.377049	0.373207	0.372718	0.372873	0.372501
11	1.49422	1.50826	1.52159	1.54797	1.56136	1.57376	1.59319	1.60881	1.63221	1.67398	1.71812	1.7401	1.78199	1.5956	1.41588	1.23519	1.08465	0.937598	1.01913	1.08139	1.12626	1.13204	1.10739	1.06035	1.01581	0.996245	0.994143	0.989234	0.992915	0.982856	0.928168	0.852262	0.769384	0.675077	0.592104	0.542591	0.504921	0.474122	0.452716	0.432046	0.41842	0.410312	0.405065	0.401051	0.399188	0.394585	0.394108	0.392904	0.39118
12	1.24332	1.30173	1.32991	1.33106	1.36037	1.3814	1.38023	1.36083	1.38267	1.41494	1.40649	1.40367	1.43373	1.47356	1.33406	1.19759	1.06751	0.964193	0.872031	0.929049	0.962253	0.987635	0.987731	0.960131	0.956776	0.983398	1.03298	1.06835	1.09027	1.07895	1.03068	0.954387	0.856392	0.746722	0.649465	0.58046	0.522121	0.479573	0.443479	0.413047	0.387094	0.374176	0.36369	0.358957	0.359519	0.362415	0.356433	0.349149	0.341067
13	1.14046	1.14449	1.16427	1.19582	1.24983	1.31015	1.35054	1.37487	1.38793	1.39846	1.41695	1.45015	1.50043	1.39867	1.27175	1.13065	1.00041	0.882765	0.937208	1.01986	1.10582	1.14895	1.15698	1.11174	1.05102	0.989962	0.947069	0.904731	0.885922	0.863178	0.823058	0.776098	0.718398	0.651929	0.586952	0.53973	0.507733	0.487899	0.474259	0.464238	0.455509	0.445807	0.434107	0.425686	0.416825	0.407848	0.400695	0.396576	0.388496
14	1.56268	1.57173	1.5582	1.54265	1.527	1.50662	1.48586	1.49291	1.51915	1.54056	1.55511	1.60015	1.64096	1.65886	1.47928	1.32881	1.12205	0.943717	0.826861	0.922763	0.975305	1.06912	1.12633	1.12279	1.10143	1.09663	1.07725	1.0711	1.0595	1.03717	0.978215	0.903106	0.807752	0.703996	0.608948	0.543741	0.499504	0.464817	0.442545	0.42124	0.408943	0.398618	0.393491	0.389656	0.392543	0.390693	0.393286	0.395226	0.397431
15	1.56268	1.57173	1.5582	1.54265	1.527	1.50662	1.48586	1.49291	1.51915	1.54056	1.55511	1.60015	1.64096	1.65886	1.47928	1.32881	1.12642	0.935145	0.769299	0.806272	0.816378	0.863049	0.884861	0.892812	0.90556	0.924658	0.939726	0.970891	1.00171	0.993072	0.942455	0.877867	0.79158	0.679359	0.591532	0.533805	0.482485	0.447276	0.425245	0.407901	0.399054	0.394108	0.392851	0.394941	0.398807	0.399464	0.401914	0.40441	0.401924
16	1.50736	1.54543	1.52831	1.50098	1.48731	1.44896	1.38289	1.34835	1.32921	1.28944	1.28198	1.27888	1.27206	1.25078	1.12459	0.994743	0.890426	0.822593	0.820653	0.908491	0.974848	NaN	1.04539	1.07659	1.01909	0.984582	0.99693	1.01585	1.07449	1.09158	1.08221	1.01489	0.907319	0.746178	0.642268	0.567819	0.517107	0.480757	0.470227	0.47001	0.473449	0.470486	0.464371	0.448453	0.432211	0.418318	0.408314	0.397723	0.397116
17	1.30952	1.34286	1.36557	1.39718	1.42043	1.45008	1.46448	1.49154	1.5508	1.59769	1.6019	1.57005	1.51994	1.36323	1.18838	1.04968	0.939532	0.879032	0.924324	0.983267	1.01991	1.04812	1.04379	1.02294	1.01614	1.02761	1.04917	1.06488	1.104	1.1125	1.07173	1.00154	0.922794	0.801315	0.699827	0.635539	0.5902	0.558962	0.534288	0.516078	0.510405	0.500388	0.488315	0.476943	0.469472	0.453994	0.446547	0.441887	0.440308
18	1.19951	1.20584	1.2329	1.27212	1.30128	1.34445	1.37066	1.36829	1.36297	1.35689	1.34911	1.34507	1.33196	1.31785	1.18055	1.06091	0.944154	0.887653	0.853817	0.955064	1.01739	1.07967	1.10226	1.10272	1.09389	1.10377	1.11026	1.11696	1.11908	1.09379	1.01762	0.926688	0.818046	0.703045	0.596812	0.530236	0.481589	0.446708	0.418967	0.40245	0.393645	0.382444	0.374644	0.370378	0.369276	0.365411	0.366699	0.367039	0.366556
19	1.19951	1.20584	1.2329	1.27212	1.30128	1.34445	1.37066	1.36829	1.36297	1.35689	1.34911	1.34507	1.33196	1.31785	1.18055	1.06091	0.93066	0.845318	0.813083	0.926683	1.01203	1.12577	1.21385	1.24007	1.2314	1.21982	1.19128	1.17058	1.15791	1.12852	1.04796	0.947295	0.823207	0.690852	0.579702	0.51915	0.478715	0.453936	0.432987	0.41454	0.401607	0.391411	0.383809	0.378453	0.376494	0.375612	0.377716	0.375965	0.37533
20	1.39983	1.35066	1.33778	1.36648	1.38413	1.40042	1.48895	1.38851	1.2622	1.14964	1.08971	0.947491	0.986953	0.992779	1.00555	0.982015	0.958111	0.938796	0.957842	0.960998	0.979726	1.00202	1.01339	1.02062	1.03566	1.04541	1.06254	1.07336	1.06811	1.03924	0.972602	0.87673	0.771972	0.671665	0.585156	0.535221	0.499878	0.47792	0.461063	0.446095	0.432014	0.420225	0.41311	0.408626	0.409276	0.409086	0.413561	0.419796	0.425198
21	1.39983	1.35066	1.33778	1.36648	1.38413	1.40042	1.48895	1.38851	1.2622	1.15333	1.08811	0.94319	0.956502	0.964011	0.9635	0.937656	0.915101	0.921423	0.938844	0.967949	1.02017	1.07092	NaN	NaN	1.12586	1.182	1.21697	1.23881	1.25997	1.23582	1.14788	1.04668	0.92581	0.786769	0.665847	0.589811	0.532015	0.491247	0.462134	0.439996	0.429098	0.419331	0.411879	0.40763	0.405696	0.403379	0.401211	0.402041	0.398084
22	1.51179	1.55557	1.59847	1.64448	1.69104	1.72183	1.73963	1.74039	1.54911	1.3687	1.18966	1.03622	0.931049	1.01595	1.07522	1.10489	1.10232	1.06679	1.03465	1.01942	1.01343	1.01189	1.01147	1.00967	1.00958	1.01149	1.01854	1.02156	1.02413	1.00825	0.959025	0.884813	0.795967	0.688542	0.591978	0.527894	0.479155	0.443392	0.420218	0.400474	0.38212	0.36826	0.357473	0.346246	0.337609	0.335281	0.332798	0.333514	0.336401
23	1.55398	1.59151	1.61266	1.63966	1.6495	1.62919	1.63807	1.60212	1.42372	1.25294	1.07694	0.850762	0.723475	0.817952	0.875572	0.931401	0.994823	1.03386	0.991203	0.994224	1.00499	1.03458	1.06139	1.08344	1.10059	1.12362	1.13354	1.14525	1.15947	1.12737	1.04517	0.942372	0.820297	0.685054	0.582326	0.51598	0.47094	0.439758	0.414156	0.397327	0.390893	0.392888	0.405276	0.421093	0.437833	0.454911	0.46713	0.473164	0.485122
24	1.55398	1.59151	1.61266	1.63966	1.6495	1.62919	1.63807	1.60212	1.42372	1.25294	1.07694	0.864374	0.738199	0.789692	0.863568	0.942702	1.03552	1.1079	1.12626	1.11171	1.08866	1.04852	1.00857	0.967135	0.934561	0.915613	0.918245	0.937536	0.968362	0.976035	0.946434	0.875662	0.780018	0.674316	0.58447	0.526679	0.489027	0.462238	0.443	0.428525	0.411858	0.398087	0.384919	0.372467	0.359622	0.346828	0.336833	0.330231	0.319797
25	1.82959	1.83631	1.84387	1.87054	1.89203	1.89519	1.8652	1.84798	1.66766	1.42726	1.20291	1.01848	0.853029	0.843337	0.877958	0.903375	0.921299	0.936696	0.929755	0.970565	1.00786	1.02138	1.01908	1.01779	1.00563	1.01312	1.02621	1.02911	1.04579	1.03527	0.971271	0.87788	0.765633	0.625613	0.509831	0.438444	0.387298	0.353474	0.330934	0.318951	0.309322	0.304315	0.301508	0.301315	0.302623	0.30539	0.307705	0.311705	0.310493
26	1.31776	1.37633	1.46432	1.55232	1.59848	1.64354	1.68167	1.68659	1.67794	1.63875	1.48744	1.30732	1.14541	1.04916	NaN	0.987583	1.02994	1.11071	1.15936	1.16302	1.13556	1.11637	1.10408	1.1262	1.14336	1.16055	1.16222	1.15675	1.15069	1.11338	1.02921	0.928406	0.808984	0.678314	0.571105	0.502539	0.453154	0.422027	0.394918	0.375634	0.361765	0.351786	0.343592	0.33981	0.333286	0.326127	0.321021	0.318852	0.318311
27	1.0887	1.11569	1.12623	1.13891	1.15175	1.16385	1.18675	1.25094	1.29888	1.35348	1.28105	1.18731	1.02196	0.863373	0.717946	0.711074	0.71088	0.753727	0.812665	0.832346	0.836532	0.838276	0.827997	0.811585	0.820327	0.841377	0.867567	0.901437	0.939306	0.945017	0.933784	0.899931	0.844314	0.775549	0.718037	0.678561	0.646373	0.62946	0.615424	0.594986	0.565364	0.547221	0.519115	0.491951	0.477312	0.465662	0.451285	0.447568	0.439654
28	1.53179	1.51547	1.49528	1.50018	1.54167	1.55026	1.56496	1.61236	1.64005	1.666	1.60474	1.46345	1.30065	1.1543	1.01611	0.996985	1.04426	1.09205	1.13101	1.15522	1.16243	1.15975	1.16412	1.1638	1.16702	1.16702	1.16275	1.15618	1.14766	1.10394	1.02938	0.944724	0.840435	0.726653	0.627547	0.553244	0.498717	0.461379	0.434194	0.415918	0.399123	0.389377	0.383562	0.38153	0.377512	0.377455	0.374367	0.372641	0.372574
29	1.53179	1.51547	1.49528	1.50018	1.54167	1.55026	1.56496	1.61236	1.64005	1.666	1.60474	1.46345	1.30065	1.15176	1.02102	1.01292	1.07189	1.1382	1.1953	1.22041	1.2272	1.23423	1.23659	1.23495	1.22718	1.21207	1.20324	1.21088	1.21624	1.18159	1.10756	1.01605	0.898327	0.780673	0.709161	0.680607	0.672008	0.669429	0.673982	0.656866	0.655397	0.651376	0.634626	0.624867	0.637528	0.631226	0.613995	0.62309	0.614418
30	1.49693	1.51476	1.51845	1.55276	1.56531	1.59215	1.60422	1.63468	1.64797	1.70409	1.76449	1.60713	1.42731	1.25148	1.07985	0.925669	0.973926	1.02315	1.06733	NaN	1.08642	1.07321	1.09028	1.11079	1.13717	1.15735	1.17363	1.18238	1.20516	1.19201	1.13367	1.05422	0.94337	0.805486	0.681749	0.601494	0.552125	0.507621	0.471965	0.451316	0.434292	0.417846	0.419001	0.416998	0.412228	0.412355	0.404277	0.393942	0.390006
31	1.49693	1.51476	1.51845	1.55276	1.56531	1.59215	1.60422	1.63468	1.64797	1.70409	1.76449	1.60713	1.42731	1.30286	1.18263	NaN	NaN	1.04013	1.10091	1.15513	1.15502	1.11356	1.07364	1.05035	1.03223	1.00981	0.995734	0.993603	0.993336	0.977324	0.924504	0.862528	0.784692	0.685728	0.597807	0.542459	0.499193	0.469074	0.444468	0.4228	0.407757	0.394206	0.384717	0.382598	0.385601	0.386924	0.388487	0.390014	0.389
32	1.09709	1.16737	1.24492	1.33093	1.41046	1.50864	1.56972	1.61023	1.64115	1.6742	1.74846	1.58804	1.42858	1.2702	1.11976	0.932974	0.97871	1.00962	1.03142	1.02204	0.982652	0.96858	0.959384	0.962412	0.965321	0.976225	0.979424	0.973925	0.954178	0.935349	0.893203	0.830487	0.765465	0.703423	0.637544	0.588469	0.546376	0.50881	0.47516	0.446369	0.42148	0.408153	0.397622	0.392683	0.387602	0.393499	0.399348	0.410683	0.413275
33	1.41311	1.47219	1.52615	1.57255	1.59277	1.62651	1.65249	1.6919	1.74069	1.81195	1.82795	1.82973	1.77138	1.56665	1.38956	1.2739	NaN	1.14812	1.06716	1.12168	1.12998	1.10713	1.09909	1.08826	1.08015	1.06388	1.04573	1.02896	1.01196	0.990877	0.960198	0.910388	0.834881	0.760351	0.685099	0.618666	0.57123	0.536729	0.49606	0.474738	0.452298	0.433453	0.422319	0.422887	0.414901	0.410949	0.408194	0.400958	0.392725
34	1.22135	1.25881	1.30041	1.32545	1.34725	1.34918	1.34285	1.34104	1.35906	1.35225	1.38643	1.46005	1.32948	1.17775	1.07196	0.950976	0.800037	0.852025	0.917834	0.953607	0.973086	1.00267	1.01393	1.03874	1.08245	1.1246	1.14239	1.15943	1.17416	1.14632	1.06075	0.957953	0.846325	0.702689	0.581303	0.509576	0.460681	0.426299	0.407141	0.394527	0.384578	0.379382	0.377249	0.375018	0.373425	0.370086	0.364468	0.357053	0.348526
35	0.994636	1.04569	1.0722	1.08068	1.05439	1.0657	1.07941	1.128	1.20386	1.27736	1.16448	1.00873	0.845178	0.663764	0.492661	0.524682	0.601102	0.697483	0.813355	0.914442	0.952551	0.981714	1.00204	0.998022	0.995131	1.00586	0.992351	0.977567	0.999152	1.02315	1.00882	0.968661	0.903202	0.806774	0.711148	0.638302	0.582187	0.536206	0.501666	0.473208	0.458784	0.452699	0.446974	0.439044	0.434635	0.437169	0.449206	0.464153	0.479226
36	1.17348	1.24245	1.19352	1.19224	1.22501	1.24325	1.2573	1.26775	1.27803	1.28343	1.29638	1.33321	1.30787	1.20556	1.04662	0.900965	0.797071	0.77987	0.804178	0.875859	0.93516	0.942939	0.945707	0.970859	0.98406	0.98993	0.99914	1.00697	1.01687	1.00224	0.922078	0.819299	0.704391	0.583617	0.482542	0.446229	0.43142	0.423733	0.414096	0.415402	0.410819	0.411044	0.414021	0.420862	0.42642	0.431852	0.434752	0.430774	0.433857
37	1.19925	1.22244	1.23711	1.25728	1.28528	1.31232	1.34933	1.37079	1.38787	1.37669	1.35841	1.34661	1.21644	1.08285	0.941046	0.78683	0.652514	0.698332	0.76455	0.840529	0.931234	0.9906	0.994133	0.980879	0.977344	0.972662	0.96924	0.970849	0.984074	0.98302	0.952356	0.905292	0.841145	0.756968	0.679619	0.630798	0.594942	0.563529	0.539901	0.521139	0.503879	0.4856	0.472733	0.4575	0.445749	0.434894	0.424491	0.420943	0.419039
38	1.19925	1.22244	1.23711	1.25728	1.28528	1.31232	1.34933	1.37079	1.38787	1.37669	1.35841	1.34661	1.21644	1.08285	0.941046	0.799907	0.71021	0.776262	0.82883	0.902922	0.998685	1.02987	1.02394	1.0222	1.02009	1.00018	0.981351	0.965278	0.966176	0.948276	0.894975	0.831283	0.761497	0.674788	0.599822	0.552338	0.511854	0.481358	0.458828	0.440857	0.432598	0.428385	0.424648	0.424143	0.42341	0.419624	0.417085	0.414782	0.408689
39	1.50485	1.45157	1.40124	1.37006	1.39528	1.44494	1.56467	1.70414	1.82694	1.89203	1.92266	1.85547	1.77952	1.73662	1.51019	1.29777	1.12298	0.948751	0.793176	0.859427	0.901201	0.949983	0.978704	0.943958	0.894476	0.863136	0.848785	0.862242	0.898088	0.915067	0.885708	0.825758	0.738553	0.626671	0.525137	0.459555	0.41639	0.385072	0.361502	0.344636	0.330834	0.32258	0.319221	0.32336	0.327222	0.334016	0.338876	0.342245	0.342685
40	1.22955	1.24303	1.24838	1.24178	1.25142	1.23791	1.20689	1.15516	1.1315	1.10773	1.10806	1.12696	1.16311	1.16647	1.0825	0.997794	0.923161	0.851756	0.829528	0.861843	0.897312	0.908652	0.933551	0.928371	0.955069	0.953925	0.939469	0.938305	0.941552	0.907646	0.843694	0.773581	0.676071	0.568454	0.486868	0.442279	0.421805	0.408335	0.398977	0.390661	0.385481	0.377533	0.367794	0.35824	0.354828	0.351159	0.351849	0.358942	0.367516
41	1.18934	1.15962	1.14682	1.13336	1.15573	1.22114	1.26837	1.30161	1.34098	1.37951	1.37705	1.37151	1.38234	1.4198	1.29728	1.16869	1.05428	0.937441	0.821085	0.866009	0.92589	0.982303	1.02459	1.04893	1.04336	1.0223	1.05382	1.05586	1.05238	1.02939	0.997883	0.903893	0.824803	0.736376	0.673121	0.62235	0.578218	0.548316	0.523149	0.499379	0.482412	0.463367	0.449121	0.440533	0.437228	0.43977	0.438208	0.444146	0.443197
42	1.46821	1.49804	1.53306	1.54352	1.55243	1.56419	1.58614	1.60021	1.61416	1.64377	1.67137	1.70173	1.74707	1.79111	1.60263	1.41642	1.21242	1.06559	0.915513	0.994153	1.06921	1.14755	1.15184	1.15425	1.16078	1.18198	1.1846	1.18264	1.18449	1.16369	1.09756	1.02903	0.949916	0.857847	0.767415	0.69331	0.631513	0.576999	0.530757	0.499987	0.479704	0.470766	0.469348	0.477022	0.482937	0.491475	0.492849	0.500956	0.505635
43	1.46821	1.49804	1.53306	1.54352	1.55243	1.56419	1.58614	1.60021	1.61416	1.64377	1.67137	1.70173	1.74707	1.79111	1.60263	1.41642	1.20019	1.01368	0.860538	0.928665	0.981816	1.03403	1.04739	1.01234	0.989077	1.04104	1.1098	1.19554	1.2803	1.32345	1.24778	1.15372	1.01853	0.882338	0.77038	0.700454	0.643392	0.599493	0.565169	0.543216	0.52714	0.519449	0.51094	0.506723	0.500731	0.498082	0.49093	0.489744	0.488574
44	1.46831	1.46121	1.45825	1.48042	1.50607	1.5552	1.58589	1.46484	1.31888	1.18045	1.03408	0.948693	1.03608	1.11106	1.16794	1.21037	1.20951	1.17972	1.16588	1.14959	1.13354	1.11929	1.11844	1.11735	1.12498	1.13126	1.13912	1.14196	1.15065	1.13542	1.07925	0.991731	0.883526	0.759587	0.647924	0.5668	0.511529	0.470236	0.441037	0.423348	0.412915	0.402421	0.397779	0.391894	0.387806	0.38445	0.388475	0.389788	0.396447
45	1.46831	1.46121	1.45825	1.48042	1.50607	1.5552	1.58589	1.46484	1.31888	1.17952	1.03966	0.945377	1.00613	1.0689	1.1147	1.13268	1.12536	1.10016	1.07286	1.04458	1.0163	0.988768	0.970585	0.962583	0.964375	0.976776	0.979046	0.985271	0.982921	0.963421	0.909444	0.840151	0.755491	0.662977	0.579043	0.516883	0.474851	0.445462	0.428903	0.41862	0.41104	0.401766	0.395651	0.38778	0.380905	0.375154	0.374288	0.372252	0.372875
46	1.47395	1.47021	1.48493	1.51618	1.52711	1.57911	1.64303	1.48386	1.32393	1.153	1.02071	NaN	0.889467	0.940882	0.971694	0.998842	1.01392	1.0018	0.996255	0.990174	0.955945	0.93064	0.927098	0.945854	0.968583	1.0397	1.07225	1.0914	1.13332	1.14755	1.09858	1.01121	0.903979	0.756095	0.636453	0.568499	0.527975	0.507423	0.49365	0.485472	0.474801	0.469041	0.46511	0.458454	0.454243	0.448343	0.445676	0.441194	0.438529
47	1.66779	1.72084	1.77355	1.80233	1.80619	1.80736	1.77932	1.56396	1.39802	1.23097	1.07936	0.921142	0.929009	0.941604	0.946047	0.917418	0.889819	0.891616	0.890956	0.900649	0.916157	0.924681	0.933469	0.946286	0.963435	0.975627	0.986059	0.997254	1.00562	0.999243	0.966677	0.917993	0.843368	0.755678	0.670919	0.61393	0.56951	0.537103	0.513763	0.500089	0.489855	0.481174	0.476938	0.473405	0.471229	0.470591	0.471632	0.472718	0.476439
48	1.70187	1.65452	1.63357	1.64034	1.6899	1.77734	1.84671	1.89704	1.68072	1.43586	1.18363	0.961016	0.78016	0.882464	0.997445	1.08249	1.16445	1.21341	1.21321	1.19759	1.19732	1.1718	1.14911	1.12987	1.13774	1.15015	1.17601	1.18958	1.18782	1.13467	1.04043	0.931507	0.801714	0.668824	0.560987	0.488254	0.44102	0.40525	0.380385	0.369441	0.367528	0.369295	0.372232	0.37563	0.378046	0.378446	0.378109	0.378181	0.378491
49	1.63709	1.63722	1.63964	1.64179	1.65957	1.67906	1.67086	1.67217	1.664	1.50465	1.33321	1.18646	1.04047	0.936532	1.00482	1.06775	1.11903	1.15528	1.17126	1.17117	1.1555	1.1406	1.13518	1.13105	1.1234	1.13261	1.13119	1.1183	1.12898	1.1314	1.08578	1.02489	0.949452	0.840564	0.732878	0.662709	0.616833	0.582071	0.558656	0.537607	0.525353	0.516764	0.509967	0.502019	0.497118	0.490294	0.483939	0.474508	0.464973
50	1.63709	1.63722	1.63964	1.64179	1.65957	1.67906	1.67086	1.67217	1.664	1.50465	1.33321	1.20108	1.09029	1.01466	1.10595	1.17081	1.20923	1.19969	1.18435	1.15263	1.15044	1.14316	1.14176	1.14297	1.16294	1.19389	1.24284	1.25491	1.26842	1.25599	1.17405	1.05228	0.950371	0.825873	0.699438	0.618221	0.564358	0.528803	0.505207	0.486413	0.476562	0.470795	0.46892	0.465901	0.473156	0.481347	0.48899	0.496135	0.506659
CDK4/6i, Corrected CDK4/6 activity
Cell #
1	0.646283	0.635328	0.645909	0.659855	0.684065	0.699737	0.728579	0.777005	0.676297	0.575645	0.459491	0.358987	0.249959	0.306623	0.349199	0.397198	0.420001	0.429622	0.409075	0.401508	0.402693	0.405907	0.40908	0.424096	0.448725	0.480326	0.53849	0.597886	0.65375	0.660932	0.627841	0.537073	0.418505	0.289484	0.184895	0.110715	0.0595933	0.0298776	0.0105895	0.00794968	0.0065915	0.0126769	0.0180044	0.00681105	0.000385345	-0.00764293	-0.0160368	-0.0221794	-0.0116671
2	0.954939	0.955244	0.96855	0.98101	0.977494	0.979817	0.991976	1.02572	0.883215	0.750703	0.604734	0.487922	0.396136	0.473449	0.536756	0.596736	0.637601	0.635867	0.642429	0.647431	0.64738	0.635722	0.62294	0.603333	0.59184	0.582258	0.580963	0.586309	0.590181	0.570712	0.532537	0.476725	0.399171	0.316811	0.25283	0.209493	0.172372	0.150251	0.126888	0.110486	0.0956852	0.0777978	0.0660811	0.0588216	0.0527317	0.0375759	0.0400617	0.0373187	0.0431846
3	0.954939	0.955244	0.96855	0.98101	0.977494	0.979817	0.991976	1.02572	0.883215	0.750703	0.587081	0.47313	0.361258	0.429098	0.502174	0.582658	0.615911	0.628002	0.652405	0.652243	0.654916	0.667662	0.669421	0.641429	0.640254	0.642766	0.641031	0.652656	0.664401	0.639893	0.588742	0.518677	0.438073	0.35327	0.284827	0.223102	0.17369	0.1292	0.102981	0.0843535	0.0821596	0.0821542	0.0874016	0.0835125	0.0823991	0.0726671	0.0690441	0.0592859	0.0555648
4	0.888283	0.925172	0.996605	1.03084	1.03426	0.98296	0.92572	0.914369	0.778375	0.645142	0.526649	0.482625	0.41595	0.510702	0.610737	0.709961	0.764033	0.79766	0.796531	0.77296	0.706929	0.659427	NaN	NaN	0.594629	0.565869	0.557027	0.599546	0.613206	0.610357	0.556332	0.48327	0.402068	0.330957	0.292413	0.255	0.224753	0.199838	0.160269	0.116381	0.115954	0.118666	0.116437	0.11422	0.105545	0.0790329	0.0533858	0.0512633	0.0390416
5	0.926997	0.92927	0.92795	0.939679	0.945824	0.966093	0.982835	1.01465	1.00557	0.865141	0.711715	0.572523	0.451089	0.394794	0.48132	0.566489	0.645181	0.688064	0.677811	0.645065	0.60297	0.560464	0.528311	0.51854	0.533059	0.55813	0.584573	0.607497	0.618152	0.595195	0.532273	0.439086	0.337617	0.227322	0.128187	0.0543216	0.00698361	-0.0279378	-0.0461592	-0.0552478	-0.0480973	-0.0390382	-0.0284037	-0.0246094	-0.0184155	-0.0160596	-0.0235757	-0.0399206	-0.0520921
6	0.858507	0.833379	0.810309	0.767679	0.742333	0.701926	0.671147	0.66399	0.662915	0.674531	0.605348	0.525115	NaN	0.399133	0.298724	0.21584	0.254388	0.328198	0.446041	0.548436	0.609472	0.662263	0.662764	0.636895	0.594476	0.553967	0.512499	0.502828	0.529995	0.562636	0.564526	0.535961	0.479746	0.388126	0.28665	0.2231	0.168113	0.128688	0.0977536	0.0825255	0.0570948	0.0489733	0.0220949	0.000620226	-0.0156601	-0.0155218	-0.0207677	-0.00177171	0.00982245
7	0.635506	0.656231	0.680496	0.695378	0.722869	0.730801	0.727263	0.72976	0.749263	0.764938	0.8089	0.708058	0.589754	0.490274	0.392656	0.273711	0.316701	0.389721	0.425502	0.456228	0.490935	0.517372	0.522112	0.536795	0.543809	0.546632	0.55046	0.559067	0.569816	0.554529	0.510918	0.439236	0.347426	0.246992	0.162114	0.100591	0.0509415	0.012602	-0.0162917	-0.0348265	-0.0534297	-0.0588889	-0.0524847	-0.0496375	-0.0413175	-0.0338793	-0.0324212	-0.0293766	-0.022112
8	0.569585	0.583655	0.553568	0.562759	0.572196	0.592473	0.623556	0.68242	0.718147	0.768642	0.83381	0.864476	0.751386	0.64606	0.539945	0.417467	0.333825	0.403152	0.475022	0.545252	0.613566	0.644706	0.630733	0.598706	0.559614	0.514245	0.480255	0.473472	0.479579	0.475242	0.439481	0.381916	0.306244	0.2119	0.143768	0.10345	NaN	0.0828239	0.0830618	0.0992681	0.0967635	0.0937039	0.0861167	0.071009	0.0540711	0.0412196	0.0331758	0.0230691	0.0136031
9	0.874098	0.888817	0.906854	0.931199	0.950342	0.975217	0.964728	0.937411	0.890953	0.842609	0.783881	0.761827	0.719456	0.606552	0.498731	0.421578	0.342745	0.339506	0.422317	0.483092	0.50604	0.516297	0.474737	0.425477	0.406609	0.400095	0.406109	0.423836	0.459159	0.471976	0.458496	0.415537	0.348047	0.254454	0.174084	0.114224	0.0736665	0.043752	0.0187355	0.00846764	0.011646	0.0198395	0.033094	0.0456888	0.049998	0.0424255	0.0307041	0.0304465	0.0373807
10	0.816639	0.829845	0.846142	0.863858	0.875297	0.896912	0.912927	0.92258	0.93344	0.940331	0.957231	0.982903	0.86748	0.735342	0.593224	0.463946	0.374737	0.456928	0.576317	0.69678	0.779633	0.818373	0.811263	0.764829	0.720731	0.68268	0.636422	0.594953	0.561701	0.523904	0.467962	0.40385	0.326634	0.236801	0.149573	0.0870473	0.0383687	0.00587804	-0.0182587	-0.0334002	-0.0447583	-0.0626061	-0.0804976	-0.0918786	-0.102834	-0.114727	-0.113757	-0.111134	-0.113077
11	0.816639	0.829845	0.846142	0.863858	0.875297	0.896912	0.912927	0.92258	0.93344	0.940331	0.957231	0.982903	0.86748	0.735342	0.593224	0.44725	0.35991	0.443879	0.554111	0.652588	0.728729	0.740341	0.710967	0.654241	0.620032	0.597197	0.574954	0.575558	0.584259	0.564411	0.519084	0.461061	0.364819	0.250574	0.15371	0.0837131	0.0219605	-0.0167723	-0.0438767	-0.06299	-0.0786801	-0.0885583	-0.102256	-0.112117	-0.115147	-0.116888	-0.109136	-0.100089	-0.0904992
12	0.866863	0.863338	0.820648	0.764667	0.714498	0.681023	0.675608	0.665169	0.630771	0.606297	0.594013	0.594438	0.714035	0.679299	0.634982	0.571267	0.494337	0.353696	0.407009	0.486595	0.57434	0.638165	0.679487	0.697647	0.697591	0.707641	0.71755	0.721066	0.729936	0.710732	0.631241	0.531729	0.415671	0.287461	0.169541	0.0809845	0.0226084	-0.00491666	-0.00719472	-0.0292942	-0.0219294	-0.0253844	-0.0387941	-0.0663966	-0.0541681	-0.0425428	-0.0309766	0.00141071	0.0311076
13	0.684065	0.682977	0.682943	0.654279	0.626901	0.600028	0.584743	0.591728	0.616154	0.623719	0.62931	0.639719	0.65419	0.56344	0.500704	0.432767	0.380302	0.357394	0.47802	0.592226	0.688431	0.758458	0.767213	0.729267	0.683287	0.633956	0.594014	0.581914	0.584275	0.561783	0.527071	0.470406	0.388257	0.292134	0.204136	0.144516	0.100251	0.0686414	0.0466037	0.0245013	0.00522725	-0.0102773	-0.0246858	-0.0405488	-0.0386148	-0.042901	-0.0497509	-0.0546474	-0.0561947
14	0.62992	0.66144	0.679363	0.715806	0.774859	0.816196	0.839651	0.852948	0.840938	0.827164	0.830394	0.847526	0.9079	0.907473	0.800289	0.680514	0.560853	0.461096	0.475261	0.582839	0.683457	0.770505	0.798103	0.764577	0.728383	0.720371	0.728234	0.732126	0.773211	0.784267	0.719505	0.609561	0.489877	0.327314	0.188398	0.110536	0.0635902	0.0392094	0.019236	0.0049646	-0.0144778	-0.014542	-0.0254495	-0.0257738	-0.0277129	-0.0309049	-0.043432	-0.0487876	-0.0651243
15	0.988689	0.944042	0.892718	0.862785	0.806544	0.781355	0.783244	0.780054	0.777798	0.816201	0.841046	0.869322	0.901246	0.922588	0.790629	0.664862	0.508209	0.395372	0.315326	0.408517	0.503125	0.609695	0.670331	0.70393	0.730435	0.762826	0.792577	0.831366	0.875096	0.866981	0.801093	0.709472	0.587128	0.455738	0.337447	0.27701	0.24667	0.2391	0.242143	0.245217	0.231899	0.223075	0.215927	0.204943	0.199133	0.190975	0.179678	0.17375	0.165542
16	0.988689	0.944042	0.892718	0.862785	0.806544	0.781355	0.783244	0.780054	0.777798	0.816201	0.841046	0.869322	0.901246	0.922588	0.790629	0.664862	0.531258	0.426565	0.401596	0.547099	0.69044	0.800956	0.862402	0.84447	0.78872	0.728711	0.697815	0.691712	0.711979	0.722227	0.703517	0.65244	0.586648	0.490012	0.390195	0.308737	0.25365	0.21081	0.182052	0.164755	0.154424	0.144106	0.132165	0.11755	0.105152	0.0932011	0.0841001	0.0784789	0.0788439
17	0.835348	0.859263	0.88955	0.925746	0.943506	0.945363	0.959164	0.939001	0.936518	0.931302	0.933892	0.914527	0.943582	0.803645	0.66993	0.533862	0.418141	0.348947	0.429441	0.488634	0.555405	0.610627	0.599316	0.577608	0.575664	0.566872	0.561805	0.550987	0.549563	0.529879	0.487222	0.423543	0.339198	0.229124	0.129306	0.0577513	0.00531421	-0.0237861	-0.0337563	-0.036351	-0.0363357	-0.0344266	-0.0369077	-0.0340357	-0.0306657	-0.0323345	-0.0411075	-0.0472014	-0.0550168
18	0.62992	0.66144	0.679363	0.715806	0.774859	0.816196	0.839651	0.852948	0.840938	0.827164	0.830394	0.847526	0.9079	0.907473	0.800289	0.680514	0.566571	0.451233	0.442455	0.545759	0.647633	0.734182	0.778858	0.758811	0.725155	0.698134	0.684501	0.6775	0.688813	0.663459	0.605885	0.510928	0.408099	0.289452	0.19731	0.124401	0.0771011	0.0392548	0.0146584	0.000636773	-0.00664798	-0.00731889	-0.00914565	-0.0119008	-0.0128644	-0.0195389	-0.0236022	-0.0284286	-0.0274675
19	0.688176	0.691671	0.741787	0.773883	0.813722	0.846453	0.888895	0.77075	0.666839	0.554966	0.457076	0.39271	0.47695	0.579661	0.671874	0.724401	0.727489	0.700077	0.65196	0.625402	0.604968	0.595656	0.602413	0.614	0.628298	0.648577	0.659103	0.663963	0.666902	0.643553	0.582658	0.503437	0.404876	0.298988	0.195079	0.119479	0.0706501	0.0355052	0.00500834	-0.00994336	-0.0195821	-0.0333542	-0.0364595	-0.0356327	-0.026628	-0.014119	-0.00706407	-0.00236176	0.011548
20	0.853291	0.824914	0.787896	0.753749	0.743989	0.761769	0.770987	0.699575	0.626653	0.546761	0.479708	0.470273	0.562946	0.654176	0.720163	0.733778	0.708191	0.661461	0.61775	0.594596	0.591876	0.578694	0.566908	0.545579	0.523897	0.50713	0.503926	0.513586	0.533232	0.529586	0.483805	0.409068	0.31095	0.204665	0.114081	0.0615437	0.0320069	0.0112858	-0.00893025	-0.0170069	-0.0242558	-0.0289916	-0.0279912	-0.0183737	-0.0277301	-0.0296865	-0.0310005	-0.0309151	-0.0346034
21	0.662079	0.720894	0.718119	0.706395	0.68474	0.670892	0.673556	0.710853	0.655317	0.596586	0.537203	0.448277	0.367939	0.408771	0.453185	0.497536	0.535715	0.54647	0.537058	0.522249	0.507098	0.493636	0.49671	0.506119	0.50328	0.502565	0.49631	0.493437	0.46774	0.457835	0.428993	0.402778	0.333943	0.283701	0.225966	0.19734	0.161992	0.158224	0.137042	0.132561	0.10815	0.102332	0.0734292	0.0646417	0.0450783	0.0410844	0.0221863	0.0158166	0.00466975
22	0.729969	0.723203	0.72915	0.76817	0.826936	0.897514	0.942327	0.974861	0.963335	0.820966	0.653844	0.522469	0.452154	0.467808	0.59128	0.639563	0.682862	0.673177	0.596482	0.530482	0.526499	0.494104	0.463024	0.440951	0.417076	0.411833	0.429791	0.461294	0.492366	0.492701	0.460118	0.39648	0.315429	0.226067	0.148474	0.0998354	0.0618624	0.0335018	0.00794771	-1.21788e-05	-0.00627821	-0.00560223	-0.0166342	-0.0347172	-0.0512097	-0.0661266	-0.0830627	-0.093336	-0.0967526
23	0.527356	0.570771	0.587685	0.628162	0.658978	0.694644	0.707708	0.723671	0.745783	0.673697	0.565223	0.449151	0.343273	0.239858	0.255988	0.323823	0.407898	0.47519	0.517863	0.515342	0.484481	0.451097	0.415067	0.394941	0.40807	0.436994	0.46396	0.468172	0.471181	0.43239	0.366336	0.290253	0.214002	0.126761	0.0658494	0.018546	-0.023112	-0.046963	-0.0627115	-0.0649359	-0.0668171	-0.070329	-0.0626394	-0.0555978	-0.0585885	-0.0639656	-0.0664929	-0.077753	-0.0849807
24	0.593789	0.626449	0.66936	0.727661	0.785304	0.83747	0.845641	0.842195	0.821389	0.81669	0.71274	0.60538	0.522661	0.4642	0.413067	0.474822	0.546805	0.60782	0.651571	0.670401	0.684167	0.691039	0.694377	0.694761	0.706347	0.711758	0.735006	0.753421	0.775789	0.764643	0.720765	0.643086	0.549689	0.443995	0.351666	0.279644	0.230365	0.195971	0.171801	0.156434	0.149804	0.145763	0.147093	0.143634	0.142977	0.14476	0.14718	0.150046	0.151928
25	0.593789	0.626449	0.66936	0.727661	0.785304	0.83747	0.845641	0.842195	0.821389	0.81669	0.71274	0.60538	0.523096	0.457561	0.400548	0.481293	0.579617	0.664164	0.718503	0.735402	0.713452	0.689138	0.664068	0.663558	0.683339	0.703494	0.717792	0.735182	0.746929	0.734002	0.68687	0.625485	0.554126	0.474114	0.408547	0.370741	0.347029	0.330819	0.317334	0.303228	0.291358	0.279471	0.266688	0.254362	0.246346	0.243142	0.244102	0.244341	0.247566
26	0.841193	0.892911	0.907274	0.943624	0.95112	0.884772	0.862211	0.905256	0.914634	0.927768	0.979566	0.854093	0.684843	0.546816	0.460144	0.423782	0.536997	0.654665	0.73109	0.773864	0.771821	0.74471	0.715293	0.710222	0.699279	0.706883	0.73238	0.770608	0.786763	0.78913	0.738369	0.648724	0.538056	0.429951	0.329083	0.265863	0.226498	0.202031	0.186162	0.177013	0.170872	0.167235	0.164792	0.167801	0.181899	0.193119	0.209456	0.228913	0.241806
27	0.841193	0.892911	0.907274	0.943624	0.95112	0.884772	0.862211	0.905256	0.914634	0.927768	0.979566	0.854093	0.684843	0.537426	0.40562	0.330474	0.402157	0.479992	0.55173	0.606285	0.636632	0.656479	0.673556	0.683219	0.706024	0.702094	0.689841	0.691388	0.694221	0.677886	0.645264	0.592514	0.517572	0.431175	0.359325	0.304758	0.265211	0.229591	0.204484	0.183642	0.166348	0.151982	0.148932	0.147024	0.148359	0.146134	0.147389	0.143263	0.131648
28	0.915283	0.94457	0.95733	0.953784	0.951006	0.932722	0.909427	0.897918	0.885779	0.875513	0.900458	0.777738	0.649927	0.534947	0.40616	0.31431	0.40656	0.511936	0.600794	0.702001	0.740194	0.738606	0.717516	0.700011	0.673026	0.648127	0.631099	0.614138	0.610181	0.591652	0.546201	0.474067	0.392683	0.296216	0.214468	0.155828	0.119808	0.0995621	0.0831736	0.0709568	0.0636124	0.0545287	0.0513919	0.0530089	0.0631038	0.076665	0.0925378	0.102186	0.101008
29	0.739435	0.76223	0.781452	0.794283	0.790115	0.769315	0.744258	0.744136	0.749756	0.768421	0.789561	0.829286	0.719976	0.611064	0.498094	0.442648	0.397641	0.477574	0.549127	0.612902	0.621084	0.577107	0.537146	0.507786	0.491433	0.470869	0.46585	0.480237	0.499288	0.500814	0.477315	0.443945	0.378526	0.296671	0.221461	0.178025	0.146021	0.127365	0.119469	0.117025	0.11244	0.121402	0.115154	0.112958	0.109049	0.106124	0.0745488	0.0584106	0.0380868
30	0.843224	0.889586	0.918116	0.930662	0.923649	0.90125	0.863797	0.836486	0.82943	0.844542	0.88939	0.922373	0.866496	0.744212	0.610343	0.443714	0.327295	0.328543	0.394083	0.449288	0.510213	0.542018	0.546736	0.538397	0.529404	0.540917	0.565046	0.579812	0.597863	0.603609	0.567216	0.49824	0.411814	0.319185	0.235285	0.173465	0.122651	0.0904343	0.0584587	0.0386276	0.0174754	0.00466188	-0.00743942	-0.0135169	-0.0217164	-0.0252794	-0.0275466	-0.0273419	-0.0252735
31	0.612688	0.611303	0.624296	0.644253	0.673336	0.676184	0.656073	0.630539	0.617831	0.597689	0.585434	0.614348	0.642465	0.617146	0.535023	0.458762	0.37025	0.291626	0.286346	0.338758	0.387111	0.423266	0.461565	0.487635	0.516425	0.54462	0.568712	0.58495	0.589375	0.569213	0.528128	0.465058	0.382268	0.279027	0.184991	0.106893	0.0469983	0.00161122	-0.0258727	-0.0411464	-0.0491174	-0.0499247	-0.0463251	-0.039838	-0.0359201	-0.0289863	-0.023064	-0.0151935	-0.0130218
32	0.700724	0.703615	0.695937	0.713606	0.72203	0.750979	0.810679	0.727978	0.634873	0.543288	0.45344	0.368787	0.454335	0.536345	0.635313	0.698208	0.706655	0.678393	0.653281	0.620791	0.593004	0.590181	0.587625	0.600308	0.61358	0.640355	0.657301	0.682815	0.69297	0.680865	0.627331	0.548528	0.458985	0.356362	0.265614	0.200504	0.153932	0.120248	0.095103	0.079683	0.0696347	0.0614719	0.0645865	0.0763878	0.0978292	0.116195	0.132846	0.145736	0.153845
33	0.744973	0.751084	0.795959	0.88293	0.924405	0.999601	1.08212	0.935804	0.740884	0.612985	0.43148	0.265348	0.304399	0.372202	0.443169	0.535481	0.57041	0.585688	0.584419	0.576432	0.552744	0.512864	0.443585	0.390891	0.355722	0.379694	0.449319	0.549294	0.616131	0.624446	0.55463	0.459303	0.351856	0.23018	0.142361	0.095667	0.0525633	0.0277446	0.0335666	0.04787	0.0584239	0.0760328	0.0945605	0.105647	0.114295	0.115955	0.115659	0.108023	0.0990882
34	0.529009	0.568411	0.607281	0.652917	0.679027	0.726091	0.75386	0.812821	0.712596	0.617174	0.506673	0.415579	NaN	0.287935	0.321234	0.343314	0.360813	0.387529	0.408026	0.416604	0.4191	0.429072	0.422006	0.391353	0.379788	0.375318	0.388024	0.404128	0.440758	0.473898	0.484053	0.451882	0.389689	0.323546	0.24535	0.192315	0.159915	0.150238	0.152496	0.155413	0.151419	0.153644	0.158831	0.150779	0.146753	0.146859	0.144471	0.135473	0.139571
35	0.529009	0.568411	0.607281	0.652917	0.679027	0.726091	0.75386	0.812821	0.712596	0.617174	0.515771	0.429324	NaN	0.298556	0.334467	0.36164	0.399532	0.42673	0.453451	0.465521	0.465116	0.441189	0.430481	0.416204	0.418592	0.45062	0.469915	0.489384	0.519298	0.507455	0.459363	0.415041	0.350896	0.274171	0.211208	0.154022	0.108556	0.0721237	0.0450215	0.0318284	0.0381943	0.0437531	0.0471419	0.0574504	0.0666913	0.0649012	0.0640143	0.0699628	0.0684925
36	0.576863	0.558853	0.565794	0.617393	0.64502	0.679894	0.717663	0.762817	0.783155	0.738739	0.649522	0.550258	0.418868	0.304568	0.293831	0.340385	0.374617	0.419882	0.418983	0.413984	0.394821	0.387668	0.401667	0.422445	0.452382	0.488773	0.549917	0.600007	0.646975	0.642548	0.621434	0.548003	0.456686	0.368186	0.301123	0.23711	0.202911	0.179523	0.16976	0.164207	0.171066	0.171654	0.170045	NaN	NaN	NaN	NaN	0.171911	0.172963
37	0.576863	0.558853	0.565794	0.617393	0.64502	0.679894	0.717663	0.762817	0.783155	0.738739	0.649522	0.546546	0.376796	0.248933	0.239509	0.282957	0.323768	0.413408	0.442152	0.453305	0.458683	0.480412	0.526211	0.572501	0.595885	0.603548	0.587305	0.533347	0.50434	0.474257	0.441331	0.402295	0.363917	0.294458	0.233009	0.180107	0.152887	0.130526	0.12044	0.121251	0.131594	0.132437	0.141908	0.137891	0.132463	0.136867	0.132149	0.122837	NaN
38	0.600484	0.594404	0.628817	0.690855	0.742539	0.820841	0.890673	0.937937	0.816454	0.694969	0.545036	0.417785	0.307638	0.364016	0.440393	0.523612	0.57714	0.604197	0.61311	0.601431	0.583989	0.580076	0.585896	0.588317	0.591059	0.602204	0.610054	0.615653	0.636838	0.624471	0.588874	0.536191	0.459255	0.350445	0.267606	0.197969	0.146276	0.109001	0.0830512	0.0718119	0.0589023	0.043699	0.0261057	0.0175733	0.000868731	-0.00633325	-0.0159341	-0.0209349	-0.0266447
39	0.596427	0.582233	0.574046	0.597141	0.613416	0.654354	0.681262	0.710523	0.72035	0.738686	0.645873	0.558507	0.468599	0.396745	0.374728	0.461188	0.570508	0.655334	0.698313	0.678414	0.655987	0.627712	0.620384	0.617924	0.652297	0.64665	0.636978	0.64718	0.675069	0.654836	0.641757	0.599014	0.524914	0.442776	0.368179	0.303148	0.25812	0.21623	0.194806	0.185864	0.183645	0.174292	0.183165	0.1848	0.188461	0.191289	0.19498	0.186349	0.179179
40	0.596427	0.582233	0.574046	0.597141	0.613416	0.654354	0.681262	0.710523	0.72035	0.738686	0.645873	0.558507	0.46691	0.373334	0.345643	0.432654	0.526166	0.63119	0.723693	0.749139	0.748107	0.739898	0.702564	0.67717	0.653665	0.637857	0.61611	0.608672	0.624133	0.617926	0.577862	0.522821	0.447672	0.347327	0.272389	0.224911	0.207315	0.206273	0.217611	0.226372	0.238423	0.231198	0.216242	0.193519	0.15485	0.128158	0.111358	0.106971	0.0991917
41	1.00206	0.994713	0.986331	1.04497	1.02759	1.00416	0.983836	0.952181	0.859434	0.720799	0.588876	0.45141	0.321211	0.202175	0.230578	0.267985	0.341007	0.434157	0.523679	0.593137	0.640988	0.662952	0.647589	0.623105	0.611448	0.599867	0.584223	0.590292	0.600335	0.58329	0.536035	0.470865	0.400051	0.322736	0.251254	0.20378	0.169529	0.131159	0.0960389	0.0730388	0.0668864	0.0623297	0.0578062	0.0595393	0.0519828	0.0350675	0.0195492	0.00534691	-0.00481319
42	0.697743	0.757576	0.808363	0.869125	0.879197	0.873905	0.88422	0.891068	0.862477	0.854699	0.73752	0.610807	0.461629	0.34727	0.284193	0.351945	0.408805	0.490771	0.533848	0.537852	0.522102	0.504094	0.482487	0.461666	0.453857	0.453644	0.455067	0.453843	0.456998	0.427981	0.377258	0.315912	0.243939	0.156417	0.0871751	0.0372386	-0.00112974	-0.0316532	-0.0495243	-0.0600969	-0.0662923	-0.0736666	-0.063572	-0.0509113	-0.0380819	-0.0265681	-0.00695942	0.00251771	0.00512506
43	0.74146	0.733235	0.726356	0.721995	0.721343	0.720913	0.734557	0.7202	0.703731	0.717401	0.724063	0.618449	0.523015	0.432512	0.334983	0.287827	0.355293	0.445767	0.541731	0.604717	0.590308	0.56735	0.512972	0.445877	0.409429	0.427274	0.440667	0.482911	0.521738	0.532673	0.488662	0.425435	0.335149	0.240592	0.154712	0.0970708	0.0576022	0.0367536	0.0259834	0.0217497	0.0217831	0.0151794	0.0130534	0.00401219	0.000717993	-0.00626746	-0.00174031	-0.00845353	-0.00461383
44	0.74146	0.733235	0.726356	0.721995	0.721343	0.720913	0.734557	0.7202	0.703731	0.717401	0.724063	0.618449	0.523015	0.418177	0.33313	0.309437	0.390377	0.46103	0.53259	0.540477	0.479565	0.412241	0.386159	0.360865	0.352609	0.356682	0.382145	0.400397	0.434153	0.444749	0.433153	0.379632	0.299295	0.200068	0.123267	0.0639306	0.0278801	0.00279686	-0.00848049	-0.00989082	0.000954256	0.0154651	0.0348954	0.0515953	0.0676321	0.0730537	0.0810319	0.0866838	0.0912458
45	0.793176	0.819751	0.842855	0.911096	0.919271	0.902284	0.882266	0.845476	0.777585	0.776897	0.78824	0.659538	0.550931	0.414042	0.262782	0.162667	0.226489	0.302878	0.399902	0.497096	0.546113	0.565105	0.565408	0.549277	0.533788	0.502943	0.489894	0.479248	0.482439	0.456839	0.43084	0.368704	0.296376	0.21766	0.159868	0.120345	0.0994017	0.0855514	0.0853725	0.0754706	0.058452	0.0473045	0.0518195	0.0474287	0.0517407	0.0560316	0.0595929	0.0550439	0.0567337
46	0.648357	0.673974	0.692868	0.722047	0.73874	0.767523	0.795705	0.819709	0.864416	0.929794	0.843527	0.717266	0.58031	0.417533	0.238855	0.211142	0.245892	0.322261	0.406737	0.493953	0.567559	0.604066	0.597885	0.570738	0.534448	0.498461	0.481207	0.479119	0.471142	0.463846	0.438239	0.389771	0.322076	0.253329	0.185651	0.133219	0.0955878	0.0612572	0.0393248	0.0298813	0.0234361	0.0183282	0.0216231	0.0253492	0.0197422	0.0151262	0.0054607	-0.0062097	-0.0240893
47	0.648357	0.673974	0.692868	0.722047	0.73874	0.767523	0.795705	0.819709	0.864416	0.929794	0.843527	0.717266	0.58031	0.401121	0.241025	0.251987	0.307837	0.361804	0.419303	0.447428	0.445702	0.437176	0.437535	0.440535	0.444628	0.452227	0.451937	0.453183	0.467956	0.457745	0.418577	0.375418	0.315459	0.227537	0.153632	0.100076	0.0574826	0.0263757	0.00335484	-0.011751	-0.0234971	-0.0305866	-0.0402527	-0.0432519	-0.040267	-0.041197	-0.0456238	-0.0516784	-0.0540163
48	0.622291	0.659405	0.742653	0.865035	0.91619	0.95992	0.987573	0.96595	0.891159	0.903317	0.765405	0.634371	0.509254	0.376846	0.233803	0.280247	0.341889	0.389325	0.452053	0.493534	0.493231	0.471125	0.468594	0.468931	0.47236	0.480377	0.502061	0.519473	0.537286	0.538185	0.506764	0.449127	0.37302	0.283036	0.202537	0.146423	0.110709	0.0847404	0.0668126	0.0504121	0.0378328	0.0253678	0.0206154	0.0131989	0.0104269	0.01033	0.00903801	0.00565197	0.00149321
49	0.622291	0.659405	0.742653	0.865035	0.91619	0.95992	0.987573	0.96595	0.891159	0.903317	0.765405	0.634371	0.509254	0.368426	0.226952	0.246444	0.279842	0.3285	0.383142	0.420255	0.45338	0.478132	0.477991	0.501848	0.512174	0.521875	0.534062	0.557194	0.572158	0.56903	0.536571	0.48261	0.410087	0.328296	0.264636	0.217577	0.175725	0.143203	0.118512	0.0994449	0.0803774	0.076214	0.0724312	0.0684486	0.058253	0.049148	0.0437612	0.0405472	0.0356618
50	0.647776	0.6372	0.630104	0.648359	0.666375	0.647965	0.663172	0.687743	0.726692	0.804939	0.867222	0.892115	0.751698	0.604549	0.441641	0.325885	0.248741	0.330653	0.420094	0.491474	0.545638	0.549893	0.534292	0.520023	0.527263	0.532691	0.532545	0.527741	0.539693	0.525071	0.478766	0.437815	0.384041	0.30724	0.237668	0.191115	0.154924	0.141053	0.13853	0.133338	0.137399	0.14202	0.148389	0.147808	0.149172	0.131784	0.128169	0.125077	0.122302
[truncated: 12 more columns]

## Sheet: Supplemental Fig 2C
Supplemental Figure 2C
Median CDK4/6 activity
	Time since drug added
	-6	-5.8	-5.6	-5.4	-5.2	-5	-4.8	-4.6	-4.4	-4.2	-4	-3.8	-3.6	-3.4	-3.2	-3	-2.8	-2.6	-2.4	-2.2	-2	-1.8	-1.6	-1.4	-1.2	-1	-0.8	-0.6	-0.4	-0.2	0	0.2	0.4	0.6	0.8	1	1.2	1.4	1.6	1.8	2	2.2	2.4	2.6	2.8	3	3.2	3.4	3.6
DMSO	1.40471	1.41325	1.42734	1.42909	1.44959	1.47693	1.48678	1.5005	1.47661	1.47173	1.45474	1.35948	1.24608	1.10112	1.00476	0.960757	0.934642	0.903663	0.935344	0.978727	1.00066	1.0214	1.03578	1.03667	1.0404	1.0294	1.04095	1.06307	1.07571	1.07138	1.07735	1.08749	1.09397	1.09859	1.11763	1.14352	1.15097	1.1698	1.17595	1.17768	1.19027	1.19713	1.20181	1.20984	1.21779	1.2355	1.24454	1.25273	1.25841
CDK4/6i	1.41148	1.42934	1.44833	1.45959	1.46268	1.48252	1.50692	1.52244	1.51135	1.46441	1.39568	1.2891	1.17713	1.04946	0.98589	0.971796	0.952145	0.967239	0.996915	1.01531	1.02755	1.04077	1.04056	1.04246	1.05462	1.06241	1.06702	1.07838	1.09591	1.09358	1.05698	0.996516	0.915559	0.820845	0.742713	0.689308	0.659272	0.63736	0.628495	0.625277	0.626266	0.630335	0.631173	0.63592	0.644305	0.645889	0.644813	0.651416	0.661006
CDK4/6i and CDK2i	1.4266	1.43836	1.45172	1.47143	1.47807	1.49807	1.50826	1.51633	1.51768	1.45759	1.40524	1.3332	1.20882	1.08903	1.01637	0.973265	0.962804	0.956043	0.980411	1.0111	1.03947	1.05265	1.0567	1.05451	1.05257	1.05576	1.06269	1.07155	1.08133	1.06542	1.01054	0.932637	0.840211	0.727168	0.628463	0.563463	0.514833	0.482115	0.459636	0.444235	0.43404	0.42361	0.4179	0.412169	0.4093	0.406514	0.404201	0.401414	0.402025
CDK4/6i, Corrected CDK4/6 activity	0.690634	0.694753	0.710772	0.724643	0.730939	0.745371	0.75838	0.769262	0.75765	0.740936	0.677789	0.616605	0.552762	0.47976	0.448986	0.437638	0.433787	0.456789	0.498387	0.531884	0.547622	0.549893	0.558657	0.557865	0.558156	0.560491	0.560293	0.569331	0.575373	0.564539	0.526035	0.45917	0.378526	0.283036	0.194705	0.133247	0.0960666	0.0679084	0.0478423	0.0376591	0.0314455	0.0253831	0.0231698	0.0213538	0.0165281	0.0150055	0.0121609	0.0102958	0.00612033
[truncated: 12 more columns]
