# Supplementary material for: Stress-mediated exit to quiescence restricted by increasing persistence in CDK4/6 activation
Source: eLife journal article supplement (doi:10.7554/elife.44571), 2020-04-07
Supplement: supp [file elife_poa_e44571_Figure_1_source_data_1.xlsx]

## Sheet: DMSO_G1 (CDK2)
Time since mitogen stimulation (hr)
0.2	0.4	0.6	0.8	1	1.2	1.4	1.6	1.8	2	2.2	2.4	2.6	2.8	3	3.2	3.4	3.6	3.8	4	4.2	4.4	4.6	4.8	5	5.2	5.4	5.6	5.8	6	6.2	6.4	6.6	6.8	7	7.2	7.4	7.6	7.8	8	8.2	8.4	8.6	8.8	9	9.2	9.4	9.6	9.8	10
																				0.437003	0.417601	0.424056	0.396302	0.397763	0.408006	0.402975	0.388743	0.443869	0.423614	0.455759	0.471147	0.454566	0.455408	0.438627	0.433858	0.411413	0.37746	0.398938	0.407654	0.375718	0.381075	0.376849	0.365798	0.391432	0.38308	0.41127	0.426829	0.437449	0.481563
0.486136	0.53823	0.55062	0.534442	0.54529	0.522943	0.556465	0.547439	0.512045	0.501282	0.49717	0.507512	0.502011	0.526167	0.491585	0.47549	0.465822	0.459161	0.467187	0.478802	0.485804	0.504049	0.5107	0.48078	0.479979	0.500138	0.477966	0.46649	0.45692	0.440644	0.440139	0.420102	0.436264	0.38089	0.398725	0.421834	0.424067	0.444836	0.470028	0.494164	0.48373	0.476448	0.495031	0.551238	0.573456	0.627198	0.651365	0.68822	0.720543	0.786368
0.4905	0.452942	0.386349	0.37067	0.369891	0.369778	0.387567	0.354077	0.33038	0.302914	0.282904	0.281353	0.279796	0.263324	0.274255	0.270643	0.282251	0.287322	0.277484	0.257189	0.255361	0.285203	0.273932	0.262877	0.290014	0.276169	0.291912	0.292941	0.294718	0.281554	0.29135	0.285654	0.318866	0.328829	0.323784	0.292926	0.289527	0.357587	0.44404	0.405068	0.374708	0.36144	0.332829	0.288287	0.333668	0.317379	0.374958	0.432397	0.519057	0.573885
0.559829	0.574895	0.569781	0.560105	0.595435	0.580696	0.567007	0.560972	0.514384	0.552355	0.512009	0.500834	0.48783	0.489742	0.485541	0.481055	0.489439	0.473131	0.45828	0.470704	0.455003	0.437827	0.421861	0.405405	0.387213	0.3974	0.381288	0.38665	0.370314	0.360823	0.358965	0.35958	0.365872	0.361557	0.355104	0.349745	0.354358	0.326089	0.332777	0.338737	0.325546	0.305859	0.315115	0.313681	0.310853	0.30533	0.420627	0.422658	0.398443	0.412402
0.539694	0.536408	0.505918	0.477884	0.450649	0.469888	0.45065	0.450983	0.455419	0.45347	0.415515	0.355454	0.35522	0.344925	0.33836	0.35056	0.347461	0.369064	0.353993	0.335879	0.352645	0.356262	0.362155	0.375892	0.37689	0.370256	0.37907	0.37548	0.391746	0.388017	0.398136	0.385859	0.395337	0.399767	0.392662	0.376966	0.373734	0.366412	0.387313	0.377426	0.373144	0.371806	0.361043	0.373354	0.401556	0.397283	0.422707	0.439022	0.434682	0.480363
0.552814	0.472125	0.410944	0.377397	0.370313	0.370252	0.374447	0.354601	0.363609	0.368066	0.377511	0.375634	0.407393	0.402024	0.413386	0.429831	0.40268	0.408578	0.397051	0.42162	0.383789	0.388024	0.371734	0.375935	0.347906	0.326671	0.326478	0.309954	0.314262	0.330576	0.329897	0.329889	0.342506	0.355072	0.379971	0.364918	0.362851	0.363695	0.386407	0.37396	0.383667	0.390889	0.418642	0.413226	0.417332	0.453381	0.476215	0.484029	0.511624	0.553838
0.395138	0.385839	0.363044	0.326805	0.317854	0.317344	0.317088	0.308401	0.346741	0.374076	0.384421	0.359766	0.367252	0.344891	0.37982	0.372835	0.354347	0.358062	0.359533	0.349851	0.340509	0.312912	0.316051	0.301382	0.313648	0.315363	0.317153	0.287083	0.282346	0.254057	0.254052	0.29491	0.295772	0.311709	0.294435	0.333983	0.359699	0.396677	0.379607	0.405375	0.409212	0.408832	0.40326	0.447304	0.485496	0.484993	0.514507	0.576319	0.600803	0.601696
0.559829	0.574895	0.569781	0.560105	0.595435	0.580696	0.567007	0.560972	0.514384	0.552355	0.512009	0.500834	0.48783	0.489742	0.485541	0.481055	0.489439	0.473131	0.45828	0.470704	0.455003	0.437827	0.421861	0.405405	0.387213	0.3974	0.381288	0.38665	0.370314	0.360823	0.358965	0.35958	0.365872	0.361557	0.355104	0.349745	0.354358	0.326089	0.332777	0.338737	0.325546	0.305859	0.315115	0.313681	0.310853	0.30533	0.420627	0.422658	0.398443	0.412402
0.486539	0.470325	0.467982	0.455802	0.496145	0.492594	0.479568	0.466961	0.436695	0.451054	0.440935	0.463211	0.425567	0.437138	0.428205	0.458497	0.433074	0.428434	0.427613	0.403108	0.408559	0.40818	0.396629	0.395439	0.385288	0.371818	0.371119	0.375718	0.376837	0.369745	0.384174	0.355103	0.360342	0.345332	0.346128	0.342831	0.351331	0.334647	0.350582	0.328518	0.349974	0.35363	0.346585	0.339576	0.329197	0.334723	0.361575	0.391309	0.432294	0.501062
0.563672	0.54706	0.568808	0.559547	0.546112	0.532184	0.552587	0.520972	0.518915	0.510674	0.507387	0.488666	0.48282	0.479143	0.484874	0.465011	0.447269	0.449559	0.448376	0.439944	0.429867	0.407577	0.40043	0.38059	0.403465	0.42001	0.399256	0.396068	0.390427	0.393489	0.385545	0.380307	0.390451	0.389675	0.397649	0.398247	0.388697	0.396116	0.387179	0.387297	0.391801	0.394872	0.385949	0.384459	0.380429	0.366321	0.356161	0.3751	0.374036	0.385565
																0.491639	0.500191	0.486377	0.478747	0.485695	0.474123	0.46617	0.4555	0.454919	0.442337	0.429466	0.42705	0.420379	0.435265	0.428625	0.411165	0.408347	0.407808	0.413361	0.398498	0.394997	0.394854	0.377143	0.387914	0.400126	0.403259	0.420036	0.436218	0.426493	0.422214	0.446753	0.474335	0.508577	0.571134
0.584101	0.669646	0.674731	0.619555	0.58799	0.555113	0.543334	0.51596	0.479396	0.492637	0.48569	0.455744	0.455422	0.441726	0.476903	0.500842	0.518025	0.531024	0.538908	0.516539	0.553898	0.527315	0.530359	0.509296	0.484766	0.463945	0.446623	0.442913	0.440731	0.437959	0.443649	0.446238	0.44418	0.435817	0.430281	0.420584	0.427353	0.436788	0.459288	0.463881	0.478872	0.465699	0.489465	0.469842	0.475074	0.491644	0.525315	0.560732	0.643661	0.696935
0.382876	0.453938	0.453722	0.460883	0.454592	0.477802	0.504247	0.497107	0.517112	0.500459	0.498671	0.511035	0.522453	0.535986	0.52354	0.535991	0.519579	0.534783	0.53063	0.518056	0.495391	0.488112	0.479879	0.468729	0.457998	0.459668	0.457258	0.42591	0.409686	0.420179	0.40988	0.408669	0.404491	0.38434	0.398135	0.40752	0.397349	0.399554	0.383763	0.376215	0.394021	0.395129	0.384325	0.38016	0.394293	0.424318	0.412785	0.451482	0.47082	0.497377
0.587411	0.663327	0.64676	0.654886	0.652545	0.622889	0.64928	0.586724	0.561181	0.583948	0.546575	0.53618	0.561449	0.530162	0.540422	0.55117	0.590993	0.553725	0.564748	0.551812	0.558778	0.568048	0.536817	0.527815	0.525531	0.530018	0.522844	0.528716	0.503805	0.472651	0.48874	0.481317	0.468191	0.466349	0.439274	0.440797	0.443511	0.439803	0.462549	0.449671	0.472349	0.49129	0.503413	0.546514	0.599509	0.626024	0.669669	0.690245	0.766513	0.860858
0.57296	0.581383	0.605577	0.631165	0.651969	0.597326	0.619973	0.626658	0.592466	0.585712	0.573011	0.567463	0.6081	0.551352	0.607974	0.59372	0.575357	0.542867	0.555836	0.537998	0.48023	0.494359	0.510176	0.472116	0.460138	0.4542	0.466446	0.464398	0.467991	0.469496	0.472009	0.450432	0.447916	0.445454	0.427242	0.435422	0.412923	0.426102	0.429226	0.447741	0.453906	0.444231	0.457573	0.458109	0.484267	0.492428	0.516525	0.553789	0.545889	0.563546
0.470488	0.506059	0.442981	0.462071	0.436649	0.41519	0.415607	0.384627	0.39765	0.402904	0.39193	0.398567	0.384925	0.376553	0.364389	0.36485	0.368276	0.351597	0.357416	0.347776	0.348764	0.336154	0.342787	0.347751	0.33786	0.335904	0.326303	0.334579	0.318071	0.330589	0.325732	0.338179	0.339453	0.341489	0.359258	0.377263	0.397459	0.399446	0.415896	0.416741	0.442932	0.450671	0.468677	0.487122	0.509027	0.547298	0.566005	0.593967	0.630869	0.703639
					0.663145	0.675254	0.658409	0.690437	0.645822	0.63316	0.546715	0.503843	0.461949	0.444084	0.444817	0.447312	0.439212	0.445659	0.437117	0.427279	0.42825	0.431481	0.41452	0.430805	0.427509	0.431136	0.42151	0.424723	0.420608	0.427498	0.414073	0.41448	0.414863	0.409657	0.397502	0.402888	0.391485	0.394452	0.387454	0.387467	0.387904	0.370263	0.376591	0.390504	0.407697	0.409469	0.45874	0.49463	0.542255
														0.449438	0.459159	0.446325	0.442178	0.434903	0.429789	0.458282	0.46335	0.479824	0.463317	0.460983	0.441911	0.425543	0.418019	0.412718	0.418457	0.409308	0.396423	0.396655	0.398853	0.396007	0.395343	0.410816	0.41646	0.426081	0.414121	0.413357	0.418717	0.405013	0.4086	0.459854	0.491148	0.522712	0.546852	0.585287	0.642444
																						0.476492	0.458545	0.459445	0.450176	0.440651	0.440537	0.454633	0.453236	0.44821	0.448666	0.442941	0.445421	0.43127	0.424479	0.410599	0.405669	0.380672	0.384371	0.368625	0.35746	0.342242	0.346147	0.3546	0.340262	0.352866	0.373856	0.377063	0.406373
0.573155	0.572745	0.571688	0.561887	0.55385	0.603184	0.574679	0.601205	0.574891	0.570102	0.554991	0.555819	0.544578	0.487667	0.503351	0.472781	0.465553	0.460174	0.454723	0.442033	0.427711	0.431247	0.408852	0.404092	0.391642	0.389985	0.393419	0.388841	0.406533	0.396706	0.371006	0.37549	0.377058	0.389043	0.389673	0.381677	0.404477	0.374154	0.366558	0.372833	0.369479	0.354855	0.37062	0.363662	0.383398	0.387902	0.425367	0.447461	0.510883	0.522787
0.596063	0.566841	0.593242	0.571354	0.536915	0.561378	0.536731	0.500645	0.530824	0.485913	0.512453	0.477169	0.487425	0.486628	0.498492	0.48565	0.49511	0.494728	0.492012	0.460132	0.470299	0.473937	0.477167	0.456258	0.505694	0.471556	0.504684	0.486684	0.566159	0.561491	0.535854	0.547364	0.533659	0.508774	0.508348	0.5052	0.506223	0.528262	0.558708	0.562461	0.581404	0.572959	0.602686	0.63945	0.673569	0.689593	0.719641	0.733159	0.752495	0.770529
0.585381	0.600706	0.571798	0.592396	0.606891	0.596517	0.572198	0.551916	0.504549	0.512678	0.520903	0.496655	0.513932	0.509669	0.506208	0.52418	0.527405	0.546105	0.541028	0.520451	0.487638	0.461658	0.447014	0.420715	0.427273	0.417355	0.430953	0.410951	0.430852	0.414312	0.399756	0.423121	0.403655	0.403527	0.393231	0.373542	0.387357	0.390236	0.390907	0.407411	0.407227	0.414283	0.431774	0.456297	0.514147	0.533277	0.599034	0.635661	0.693582	0.729439
0.486356	0.488197	0.498815	0.491886	0.515952	0.508323	0.471504	0.465953	0.480485	0.434888	0.427488	0.389382	0.395048	0.386518	0.418285	0.396574	0.374142	0.366675	0.358916	0.352407	0.338649	0.31736	0.312688	0.288366	0.30244	0.318952	0.296681	0.309109	0.313611	0.306548	0.306234	0.314669	0.322313	0.327156	0.325446	0.325027	0.340139	0.367941	0.380845	0.393264	0.406688	0.439327	0.472344	0.509486	0.57514	0.606689	0.655965	0.680262	0.759531	0.814023
0.515565	0.507293	0.546528	0.556181	0.459269	0.476684	0.453794	0.477744	0.485233	0.489454	0.513648	0.50111	0.478867	0.456575	0.463003	0.472713	0.476683	0.478062	0.462619	0.434663	0.418839	0.400622	0.377778	0.370233	0.352456	0.314142	0.288608	0.257468	0.238414	0.224768	0.202632	0.193491	0.199511	0.192384	0.194342	0.180699	0.193706	0.210765	0.226984	0.241956	0.251054	0.240862	0.254697	0.244395	0.260724	0.278506	0.33341	0.376773	0.424905	0.492334
			0.461257	0.441695	0.403964	0.413181	0.437439	0.433638	0.449345	0.442985	0.447786	0.442132	0.447592	0.451783	0.44144	0.439748	0.433357	0.436407	0.435552	0.429388	0.41765	0.408813	0.414595	0.412551	0.406821	0.397814	0.399748	0.388334	0.400297	0.408376	0.414999	0.421873	0.432994	0.422054	0.420333	0.421994	0.409265	0.442471	0.419273	0.379471	0.380113	0.379276	0.384962	0.451977	0.485746	0.487314	0.505012	0.513421	0.514609
																						0.407187	0.421398	0.420479	0.4144	0.420542	0.446788	0.468791	0.456025	0.453762	0.468021	0.472326	0.468558	0.471878	0.46042	0.470805	0.443802	0.459139	0.475143	0.499127	0.528087	0.527625	0.522957	0.504764	0.505328	0.499146	0.495028	0.528317	0.564017
0.514186	0.488137	0.437405	0.444363	0.429623	0.414624	0.426424	0.436168	0.417718	0.392868	0.408586	0.397682	0.399046	0.399067	0.384611	0.384351	0.397691	0.405049	0.409023	0.413813	0.408962	0.411118	0.419181	0.390083	0.396579	0.376672	0.375034	0.380902	0.388512	0.389616	0.3637	0.361306	0.365347	0.368585	0.359149	0.361686	0.364896	0.355873	0.344781	0.355144	0.333002	0.336703	0.343079	0.366751	0.380234	0.405291	0.445802	0.499766	0.536418	0.576607
0.375037	0.388926	0.422814	0.398407	0.427347	0.419641	0.420879	0.391137	0.451822	0.451938	0.439814	0.419908	0.417147	0.418343	0.409726	0.397055	0.406842	0.410119	0.422748	0.435678	0.444698	0.42303	0.421519	0.430994	0.426199	0.398808	0.407092	0.387235	0.394696	0.387542	0.387872	0.406799	0.375972	0.37353	0.360692	0.374896	0.395908	0.377115	0.441434	0.429541	0.446467	0.457873	0.499069	0.524673	0.536052	0.585224	0.632131	0.67183	0.702579	0.743587
0.476309	0.440743	0.457274	0.422854	0.443301	0.444452	0.424832	0.412783	0.42571	0.415428	0.415805	0.40902	0.413829	0.408248	0.390511	0.382045	0.403082	0.413056	0.401124	0.378288	0.363418	0.353717	0.341009	0.330239	0.365534	0.388431	0.397079	0.385541	0.389188	0.402381	0.424115	0.397022	0.396138	0.382557	0.402423	0.412141	0.412854	0.370945	0.357666	0.314917	0.294834	0.28378	0.269001	0.353662	0.358543	0.34223	0.332157	0.347252	0.374572	0.421797
0.489899	0.465787	0.451933	0.451237	0.441559	0.425114	0.475562	0.482815	0.482977	0.462929	0.401902	0.437687	0.435776	0.449178	0.436469	0.434011	0.430412	0.427409	0.415009	0.433836	0.421232	0.418816	0.414647	0.404481	0.408792	0.407415	0.399229	0.408719	0.401358	0.398197	0.401623	0.402427	0.42497	0.408496	0.41753	0.414605	0.422634	0.429818	0.424912	0.431961	0.415254	0.410306	0.392581	0.398891	0.400184	0.416452	0.428332	0.421224	0.410238	0.425883
0.580234	0.57681	0.539954	0.548053	0.554197	0.556521	0.552669	0.550517	0.51928	0.498954	0.504641	0.488821	0.469842	0.408902	0.410796	0.364899	0.340768	0.340952	0.330003	0.318625	0.337267	0.327339	0.313469	0.305928	0.303647	0.287784	0.278565	0.279284	0.279274	0.271991	0.281926	0.276353	0.252753	0.248179	0.250339	0.249103	0.249048	0.244162	0.231484	0.231011	0.242902	0.240064	0.236493	0.247171	0.263358	0.274781	0.314942	0.362475	0.419128	0.494753
0.470289	0.480275	0.442029	0.434976	0.403827	0.395598	0.402889	0.386119	0.375975	0.364197	0.354719	0.355231	0.346415	0.353189	0.332626	0.325164	0.317317	0.328662	0.336304	0.347151	0.344766	0.344919	0.355375	0.35919	0.341586	0.341096	0.345216	0.341322	0.334349	0.321664	0.317275	0.309002	0.29181	0.28826	0.287861	0.288705	0.276991	0.283437	0.288265	0.281475	0.28515	0.278555	0.280683	0.276684	0.273979	0.278282	0.277542	0.29172	0.319805	0.359503
0.590581	0.60373	0.539981	0.594748	0.625689	0.604715	0.589774	0.569299	0.503366	0.505928	0.502775	0.485296	0.440162	0.447658	0.441756	0.439969	0.428625	0.392664	0.397803	0.41821	0.431549	0.423623	0.433296	0.425689	0.419961	0.420226	0.427212	0.406245	0.399787	0.396445	0.383828	0.392092	0.386224	0.37856	0.37524	0.398308	0.389259	0.376978	0.392181	0.391992	0.422255	0.441935	0.461606	0.484305	0.517405	0.582312	0.642286	0.671365	0.709197	0.743001
0.591646	0.574596	0.60755	0.621666	0.615207	0.59775	0.554545	0.566279	0.527505	0.595652	0.576156	0.558099	0.5571	0.558485	0.529289	0.510544	0.481446	0.474225	0.461691	0.467026	0.483959	0.492672	0.474722	0.476145	0.471096	0.455324	0.456045	0.462054	0.461186	0.441139	0.426569	0.441989	0.438514	0.452346	0.431855	0.434036	0.447955	0.473771	0.480267	0.455148	0.481285	0.467559	0.498329	0.506566	0.528085	0.601081	0.707599	0.73097	0.749266	0.752412
													0.420136	0.42391	0.426195	0.429888	0.427109	0.420257	0.408648	0.445301	0.4625	0.451703	0.430957	0.428087	0.424739	0.428365	0.453148	0.414979	0.418843	0.411533	0.4283	0.406784	0.397398	0.403111	0.410169	0.459014	0.52712	0.581998	0.63084	0.673707	0.698926	0.694616	0.716564	0.762219	0.774361	0.709682	0.776692	0.779649	0.781267
0.539694	0.536408	0.505918	0.477884	0.450649	0.469888	0.45065	0.450983	0.455419	0.45347	0.415515	0.355454	0.35522	0.344925	0.33836	0.35056	0.347461	0.369064	0.353993	0.335879	0.352645	0.356262	0.362155	0.375892	0.37689	0.370256	0.37907	0.37548	0.391746	0.388017	0.398136	0.385859	0.395337	0.399767	0.392662	0.376966	0.373734	0.366412	0.387313	0.377426	0.373144	0.371806	0.361043	0.373354	0.401556	0.397283	0.422707	0.439022	0.434682	0.480363
0.552814	0.472125	0.410944	0.377397	0.370313	0.370252	0.374447	0.354601	0.363609	0.368066	0.377511	0.375634	0.407393	0.402024	0.413386	0.429831	0.40268	0.408578	0.397051	0.42162	0.383789	0.388024	0.371734	0.375935	0.347906	0.326671	0.326478	0.309954	0.314262	0.330576	0.329897	0.329889	0.342506	0.355072	0.379971	0.364918	0.362851	0.363695	0.386407	0.37396	0.383667	0.390889	0.418642	0.413226	0.417332	0.453381	0.476215	0.484029	0.511624	0.553838
0.501249	0.491272	0.486535	0.519217	0.48908	0.453818	0.444523	0.453052	0.447548	0.44123	0.450332	0.44518	0.445861	0.42464	0.42192	0.397133	0.395346	0.381824	0.367526	0.372394	0.366956	0.369524	0.368225	0.354782	0.3451	0.340393	0.344977	0.342213	0.340268	0.350922	0.359068	0.342689	0.324882	0.323459	0.307296	0.31635	0.319881	0.334103	0.335017	0.316027	0.342345	0.334921	0.347914	0.36956	0.39995	0.439176	0.495358	0.543589	0.569739	0.619128
0.485551	0.51463	0.487003	0.49009	0.443918	0.436477	0.451257	0.439113	0.421403	0.41384	0.400907	0.390722	0.394362	0.370959	0.36141	0.361806	0.337098	0.345842	0.337225	0.314479	0.3213	0.292426	0.316961	0.290934	0.310756	0.285551	0.288766	0.27202	0.280302	0.279165	0.284203	0.296256	0.301518	0.309411	0.299654	0.311085	0.314483	0.311136	0.330661	0.330289	0.353883	0.381157	0.400011	0.445556	0.469022	0.48067	0.514663	0.544097	0.572057	0.607885
0.478863	0.478934	0.483669	0.480526	0.471129	0.466282	0.428388	0.439816	0.421264	0.410713	0.388721	0.362308	0.351796	0.339535	0.349488	0.327164	0.34246	0.331175	0.321046	0.318542	0.325613	0.317586	0.327702	0.312896	0.329839	0.324598	0.34001	0.320826	0.340343	0.34298	0.359162	0.332794	0.333466	0.334864	0.338298	0.329932	0.311455	0.32242	0.317315	0.332054	0.351598	0.375532	0.409767	0.423818	0.469936	0.505503	0.569152	0.708505	0.753759	0.792326
0.598534	0.599385	0.640234	0.630529	0.643601	0.641269	0.637439	0.621912	0.592306	0.584547	0.577369	0.555479	0.531812	0.530099	0.514294	0.534151	0.507125	0.503905	0.468118	0.457475	0.439459	0.429651	0.409369	0.402397	0.368615	0.376216	0.397177	0.376595	0.380082	0.371548	0.383715	0.390188	0.368366	0.362294	0.361198	0.347631	0.358303	0.35223	0.38095	0.374568	0.397846	0.385374	0.372307	0.349691	0.345887	0.36811	0.400511	0.45029	0.500556	0.626924
							0.622035	0.595678	0.552323	0.516812	0.504096	0.498989	0.487406	0.480499	0.487045	0.451162	0.452957	0.424582	0.429378	0.418772	0.421855	0.404575	0.394411	0.37783	0.344048	0.362664	0.35795	0.369985	0.385136	0.361387	0.356991	0.361796	0.367329	0.365752	0.386128	0.39825	0.420207	0.455381	0.501653	0.536356	0.619964	0.70181	0.786322	0.747764	0.691197	0.653294	0.61891	0.613655	0.61893
0.556755	0.526358	0.519858	0.491139	0.457903	0.479322	0.488415	0.477445	0.469424	0.464714	0.461936	0.457961	0.448954	0.456503	0.445711	0.41471	0.435994	0.422486	0.410985	0.438591	0.451172	0.452001	0.431834	0.434648	0.448495	0.426108	0.46443	0.448005	0.430753	0.43109	0.418545	0.408576	0.421999	0.418342	0.434881	0.423941	0.41592	0.439602	0.446433	0.455498	0.460046	0.501771	0.481015	0.498084	0.498806	0.51684	0.519154	0.513731	0.504702	0.509528
0.532318	0.542712	0.530018	0.536789	0.567801	0.59888	0.601298	0.559711	0.560331	0.516481	0.47332	0.417587	0.405868	0.409087	0.408076	0.394759	0.39353	0.391513	0.38116	0.381332	0.375238	0.367111	0.364793	0.367665	0.362411	0.385926	0.396711	0.381355	0.381083	0.382577	0.375227	0.358371	0.368842	0.383062	0.390267	0.379398	0.378808	0.354979	0.331984	0.322953	0.331207	0.341576	0.348157	0.352845	0.36361	0.399988	0.442132	0.544388	0.685134	0.801144
0.5942	0.580158	0.583365	0.592698	0.565589	0.585376	0.56409	0.574149	0.550539	0.522604	0.503756	0.468725	0.453629	0.452673	0.443106	0.437988	0.429482	0.432977	0.428688	0.425555	0.436154	0.420756	0.406893	0.400014	0.388336	0.393061	0.373825	0.37233	0.36295	0.369598	0.353542	0.348473	0.333491	0.326667	0.312871	0.300978	0.296382	0.300072	0.287007	0.305918	0.320299	0.30284	0.30243	0.313365	0.302326	0.308775	0.31698	0.319723	0.324229	0.36871
0.489143	0.494385	0.497082	0.463031	0.464072	0.446006	0.408819	0.392702	0.370155	0.361871	0.375271	0.375205	0.373587	0.363947	0.360213	0.351453	0.351158	0.354017	0.365272	0.365607	0.371272	0.355384	0.341269	0.339834	0.337088	0.329945	0.314042	0.318554	0.317275	0.309749	0.307583	0.316331	0.325132	0.333978	0.341232	0.338386	0.343831	0.341821	0.339945	0.341718	0.339541	0.343483	0.341149	0.337026	0.339242	0.354283	0.382205	0.424104	0.477519	0.539764
0.486136	0.53823	0.55062	0.534442	0.54529	0.522943	0.556465	0.547439	0.512045	0.501282	0.49717	0.507512	0.502011	0.526167	0.491585	0.47549	0.465822	0.459161	0.467187	0.478802	0.485804	0.504049	0.5107	0.48078	0.479979	0.500138	0.477966	0.46649	0.45692	0.440644	0.440139	0.420102	0.436264	0.38089	0.398725	0.421834	0.424067	0.444836	0.470028	0.494164	0.48373	0.476448	0.495031	0.551238	0.573456	0.627198	0.651365	0.68822	0.720543	0.786368
0.56538	0.54703	0.556512	0.572156	0.590435	0.599047	0.566317	0.550149	0.492173	0.45843	0.424374	0.426431	0.406546	0.410701	0.403877	0.394907	0.390235	0.371641	0.373099	0.380303	0.381433	0.392691	0.391014	0.387325	0.374804	0.387713	0.377853	0.371018	0.3515	0.35801	0.356818	0.345694	0.357131	0.354916	0.353547	0.355647	0.349817	0.358358	0.352122	0.334949	0.342597	0.34211	0.342949	0.355745	0.370863	0.354488	0.374839	0.40669	0.445008	0.529291
0.593001	0.568849	0.505934	0.464776	0.448301	0.46632	0.446045	0.423919	0.413526	0.396399	0.371684	0.355777	0.351255	0.338206	0.331436	0.328254	0.345586	0.356354	0.385531	0.373365	0.358949	0.362803	0.369066	0.368724	0.358998	0.381524	0.382225	0.388776	0.389574	0.388024	0.370992	0.367256	0.37462	0.354107	0.355605	0.343963	0.338806	0.32718	0.343601	0.353877	0.349382	0.341277	0.340302	0.332966	0.360491	0.381148	0.400989	0.469181	0.519178	0.571082
0.496688	0.456217	0.476694	0.493444	0.53681	0.579628	0.535362	0.511729	0.467669	0.480695	0.429751	0.438469	0.438122	0.413236	0.439506	0.423246	0.419515	0.431028	0.429886	0.408398	0.441667	0.430324	0.426713	0.398504	0.357283	0.366338	0.363963	0.363361	0.355624	0.325898	0.350745	0.35397	0.3726	0.369856	0.372861	0.38059	0.39771	0.402103	0.428475	0.446748	0.490887	0.558037	0.593464	0.637615	0.693154	0.736875	0.813956	0.833963	0.799791	0.793801
0.551706	0.541575	0.496581	0.491759	0.491579	0.449268	0.427314	0.408355	0.368665	0.356981	0.335327	0.329357	0.314742	0.308624	0.293404	0.291508	0.311908	0.30833	0.315866	0.314606	0.34606	0.342988	0.336192	0.329816	0.334714	0.345547	0.365296	0.357634	0.349192	0.34395	0.347795	0.354785	0.374295	0.369463	0.368907	0.363512	0.338927	0.344852	0.347392	0.353473	0.352793	0.350313	0.373411	0.397354	0.432612	0.482166	0.523334	0.608589	0.686797	0.748435
0.572722	0.564933	0.519295	0.508651	0.502057	0.517202	0.501327	0.499126	0.503422	0.523353	0.521426	0.519175	0.518884	0.527344	0.499053	0.514264	0.507897	0.482008	0.479492	0.464058	0.457192	0.45917	0.446501	0.427783	0.416267	0.414558	0.406896	0.425424	0.402127	0.391179	0.392947	0.387094	0.360846	0.359267	0.348017	0.346883	0.346952	0.332966	0.333869	0.335935	0.331377	0.32954	0.338457	0.347734	0.354244	0.364026	0.376697	0.42024	0.509574	0.569627
0.564832	0.557749	0.587786	0.579569	0.586131	0.558704	0.521913	0.517559	0.512568	0.498605	0.484607	0.490054	0.513903	0.527955	0.505641	0.514404	0.515217	0.488671	0.46626	0.465897	0.442338	0.450139	0.425614	0.407844	0.407163	0.41138	0.435136	0.416014	0.415759	0.415368	0.422287	0.420653	0.428616	0.443326	0.455816	0.453874	0.43939	0.443496	0.453467	0.430864	0.425695	0.42756	0.429228	0.458637	0.49114	0.564638	0.649344	0.680957	0.745496	0.771815
0.570687	0.612683	0.516974	0.501635	0.48425	0.497392	0.475094	0.506076	0.456463	0.469087	0.466939	0.456488	0.469805	0.472153	0.458067	0.461401	0.445327	0.463755	0.473678	0.483629	0.489619	0.482979	0.475397	0.45378	0.45661	0.462913	0.444412	0.427359	0.440406	0.437167	0.430865	0.435896	0.431225	0.404888	0.40191	0.415986	0.429685	0.42974	0.424182	0.416459	0.418936	0.413784	0.409253	0.415803	0.429698	0.43558	0.439608	0.457997	0.485021	0.498214
0.589361	0.606721	0.563024	0.590894	0.628485	0.636802	0.650789	0.621047	0.615797	0.571722	0.549387	0.556346	0.584274	0.565043	0.529397	0.536379	0.507123	0.510613	0.516522	0.519584	0.504095	0.499949	0.4826	0.458914	0.471951	0.481379	0.476784	0.461472	0.424944	0.418265	0.394648	0.400039	0.421715	0.432606	0.432662	0.440891	0.450107	0.437453	0.437515	0.453195	0.455241	0.441399	0.448306	0.449589	0.458654	0.458206	0.448662	0.459409	0.465604	0.471245
0.578575	0.57042	0.538307	0.540056	0.500821	0.521556	0.49202	0.511465	0.532877	0.535115	0.51449	0.49455	0.491303	0.483807	0.506434	0.477157	0.479406	0.468752	0.458006	0.454683	0.429588	0.437383	0.433008	0.430184	0.494075	0.498883	0.485164	0.466407	0.439844	0.429037	0.406477	0.379374	0.379351	0.368713	0.382574	0.372159	0.364076	0.349216	0.355856	0.35574	0.371881	0.386315	0.401932	0.434241	0.499109	0.582168	0.67697	0.775433	0.864566	0.899517
0.583458	0.59765	0.546051	0.578068	0.609735	0.66522	0.599103	0.596881	0.562135	0.548122	0.571424	0.56034	0.56861	0.532103	0.544429	0.515795	0.527321	0.509614	0.485203	0.468035	0.468491	0.467612	0.470884	0.456417	0.464987	0.472913	0.464648	0.450369	0.465188	0.467025	0.484134	0.47287	0.50208	0.51076	0.548421	0.569519	0.599718	0.596558	0.594837	0.596339	0.592079	0.582939	0.584672	0.591841	0.589032	0.610998	0.599581	0.624009	0.654052	0.681782
0.570281	0.642306	0.632229	0.660539	0.65331	0.6491	0.652107	0.611392	0.61284	0.575797	0.598234	0.584431	0.593514	0.574586	0.547995	0.548858	0.610664	0.539643	0.522601	0.543693	0.502248	0.518714	0.53119	0.498153	0.534174	0.542203	0.527992	0.537806	0.50392	0.532722	0.513997	0.521303	0.507761	0.522426	0.514581	0.504148	0.488098	0.46739	0.479909	0.460299	0.452508	0.451876	0.477838	0.482675	0.485307	0.486703	0.489321	0.48573	0.502179	0.514737
0.571916	0.560274	0.565353	0.588499	0.584195	0.556216	0.495368	0.456366	0.426736	0.4476	0.433927	0.421605	0.447234	0.472914	0.431524	0.458966	0.510827	0.503175	0.495634	0.486024	0.476162	0.484512	0.464038	0.450221	0.466496	0.4601	0.486643	0.431185	0.468045	0.50579	0.539456	0.537267	0.545656	0.520889	0.496389	0.510184	0.488996	0.46821	0.459886	0.487878	0.490464	0.497463	0.503869	0.537798	0.567369	0.631121	0.655988	0.738185	0.763863	0.793316
0.467965	0.418106	0.43272	0.382519	0.397425	0.404328	0.375914	0.372124	0.366926	0.343507	0.299598	0.272098	0.241399	0.242864	0.217713	0.2306	0.220757	0.230983	0.232744	0.252188	0.265948	0.255747	0.262535	0.282444	0.27828	0.279125	0.271054	0.287857	0.267542	0.251882	0.266003	0.249864	0.260575	0.253018	0.256153	0.261019	0.277614	0.293616	0.312951	0.315512	0.31937	0.34904	0.35623	0.360827	0.407361	0.430423	0.439357	0.453293	0.480039	0.549802
0.547121	0.52507	0.560841	0.595773	0.618332	0.600749	0.619823	0.645455	0.59889	0.593253	0.571438	0.543518	0.503313	0.489633	0.504535	0.441941	0.392	0.410407	0.389468	0.383546	0.376895	0.395194	0.385128	0.341163	0.32699	0.345518	0.347899	0.33679	0.333632	0.3548	0.339865	0.349154	0.371201	0.366516	0.37064	0.390929	0.40908	0.417531	0.394154	0.426279	0.400332	0.390722	0.386008	0.399321	0.419186	0.480694	0.502429	0.544396	0.607827	0.649242
0.524777	0.536173	0.53739	0.540373	0.538742	0.557418	0.529411	0.549016	0.537256	0.545126	0.532653	0.511372	0.51718	0.505951	0.508976	0.487111	0.47935	0.529638	0.531208	0.561156	0.528953	0.558263	0.558749	0.574799	0.582893	0.568491	0.553527	0.548784	0.547829	0.575838	0.549722	0.546222	0.560939	0.562201	0.54354	0.520761	0.515058	0.512958	0.491692	0.490209	0.481624	0.481666	0.469635	0.471005	0.454578	0.458011	0.471262	0.477777	0.481602	0.48409
0.494475	0.528592	0.4726	0.525893	0.486315	0.497166	0.471904	0.473019	0.49007	0.495288	0.487132	0.515623	0.468055	0.539394	0.446034	0.48885	0.433257	0.396462	0.395636	0.385677	0.381897	0.439047	0.413869	0.401871	0.420783	0.426651	0.434603	0.427185	0.427996	0.436373	0.404454	0.41801	0.449768	0.458114	0.493164	0.477813	0.469536	0.492408	0.570087	0.64113	0.622115	0.606084	0.745931	0.761389	0.764841	0.722385	0.660901	0.691437	0.743097	0.780459
0.518071	0.53345	0.52259	0.506612	0.486197	0.492806	0.474741	0.494633	0.48764	0.490589	0.480014	0.461325	0.452254	0.45734	0.434146	0.436079	0.429809	0.443407	0.434525	0.432742	0.440948	0.43078	0.417693	0.405184	0.401144	0.374835	0.381931	0.358238	0.342892	0.330479	0.316483	0.301016	0.303263	0.31055	0.305224	0.303452	0.314589	0.323235	0.33579	0.351394	0.374651	0.402656	0.428044	0.446752	0.459007	0.475367	0.477624	0.492388	0.576391	0.643483
										0.335077	0.342789	0.332004	0.340006	0.344761	0.35474	0.360656	0.385145	0.384174	0.400643	0.39967	0.412413	0.417177	0.43257	0.433769	0.438512	0.43981	0.414706	0.392696	0.362444	0.378544	0.40912	0.425087	0.409071	0.407298	0.4066	0.404306	0.414299	0.411559	0.388354	0.396958	0.387395	0.388182	0.406143	0.420287	0.43546	0.458374	0.470496	0.497576	0.54532
																				0.540622	0.575186	0.589244	0.605623	0.596383	0.572637	0.567506	0.555252	0.562759	0.554101	0.561161	0.539412	0.534394	0.548365	0.529943	0.51474	0.517016	0.500499	0.497934	0.522046	0.512221	0.508365	0.486051	0.483311	0.481832	0.488272	0.475113	0.485989	0.506661	0.514636
																						0.562765	0.573819	0.607561	0.579802	0.612882	0.532772	0.513596	0.471675	0.487363	0.482671	0.450623	0.437161	0.423927	0.410274	0.399962	0.413956	0.41021	0.424195	0.44013	0.455012	0.43741	0.438294	0.440196	0.435131	0.406087	0.426002	0.414376	0.419711
																							0.601843	0.528032	0.456246	0.445306	0.454555	0.41587	0.469172	0.448903	0.410187	0.429028	0.446045	0.39906	0.36703	0.3997	0.387507	0.375709	0.390125	0.444494	0.411623	0.432016	0.400547	0.405154	0.426684	0.449855	0.514754	0.588311	0.666224
0.575691	0.562621	0.573686	0.587803	0.578484	0.575697	0.557007	0.531156	0.494718	0.454574	0.422127	0.425504	0.443103	0.426544	0.408362	0.381272	0.386635	0.374532	0.394129	0.399784	0.386973	0.379507	0.386294	0.38899	0.387695	0.384105	0.379039	0.364256	0.377758	0.359457	0.376428	0.371337	0.374899	0.369523	0.361155	0.362745	0.35775	0.365912	0.369677	0.390237	0.413529	0.452619	0.50242	0.563326	0.637175	0.647342	0.736274	0.747659	0.803929	0.806447
0.505598	0.49855	0.454313	0.443472	0.422583	0.412933	0.403932	0.40753	0.392821	0.401712	0.385661	0.381916	0.363761	0.361401	0.362706	0.356051	0.349725	0.364068	0.326289	0.345316	0.346454	0.356059	0.375458	0.366094	0.369904	0.362613	0.353433	0.364175	0.355591	0.339023	0.341651	0.323491	0.313228	0.293597	0.296112	0.299924	0.305829	0.307592	0.318207	0.313805	0.33666	0.341167	0.347035	0.36681	0.341633	0.341115	0.367432	0.415757	0.480309	0.522193
0.587278	0.609634	0.656664	0.631609	0.592997	0.557163	0.488606	0.489035	0.434795	0.445381	0.438765	0.430251	0.443983	0.444498	0.444827	0.436718	0.404314	0.404595	0.394246	0.391554	0.374088	0.362389	0.373452	0.377971	0.390443	0.405328	0.393806	0.393664	0.397945	0.383687	0.37875	0.391902	0.38337	0.376157	0.403859	0.40997	0.401276	0.405185	0.425948	0.440595	0.47052	0.482882	0.475107	0.47655	0.488676	0.519314	0.53611	0.582826	0.617192	0.66191
0.567445	0.564386	0.565444	0.566733	0.568197	0.549504	0.523772	0.491904	0.493462	0.495038	0.494805	0.479634	0.477467	0.46315	0.445451	0.456208	0.434569	0.427496	0.41523	0.419159	0.402464	0.408026	0.40288	0.396391	0.413039	0.367598	0.362425	0.353456	0.349857	0.362058	0.385015	0.372874	0.395177	0.395943	0.408573	0.407186	0.392098	0.402399	0.368003	0.372582	0.402382	0.429309	0.483612	0.563703	0.619753	0.684949	0.751389	0.807327	0.837875	0.87998
0.328279	0.26997	0.246519	0.287509	0.346059	0.391162	0.416575	0.432313	0.44332	0.440597	0.408115	0.400077	0.379936	0.40294	0.389571	0.35205	0.33842	0.345049	0.334484	0.343462	0.350664	0.350907	0.340618	0.343356	0.359677	0.366198	0.364693	0.333324	0.321019	0.356338	0.332558	0.303398	0.31417	0.297517	0.274692	0.279271	0.300241	0.287443	0.270181	0.280163	0.292961	0.307223	0.283102	0.292825	0.299888	0.374419	0.454611	0.551822	0.609989	0.686557
0.564198	0.534843	0.557966	0.580871	0.58633	0.566395	0.54831	0.577785	0.55374	0.520209	0.497926	0.481999	0.451506	0.462171	0.450219	0.436762	0.414307	0.433772	0.432032	0.412844	0.412197	0.408056	0.404187	0.403784	0.392669	0.382399	0.384537	0.379891	0.378839	0.350661	0.369887	0.366573	0.366497	0.370655	0.363178	0.374409	0.351308	0.362241	0.371059	0.337128	0.350123	0.34886	0.371458	0.352647	0.358707	0.371309	0.381149	0.392918	0.415522	0.429579
0.546114	0.550824	0.583341	0.585977	0.581463	0.556621	0.567604	0.546217	0.557953	0.529513	0.540353	0.550759	0.532276	0.535921	0.545064	0.515192	0.51381	0.493493	0.508856	0.517914	0.492266	0.497161	0.485039	0.474611	0.456263	0.461605	0.462693	0.472431	0.456001	0.470546	0.454331	0.451789	0.430622	0.433353	0.425866	0.430026	0.404929	0.418338	0.401637	0.384185	0.399308	0.397275	0.395872	0.420454	0.447831	0.46013	0.460359	0.498676	0.516795	0.520814
																							0.479626	0.45677	0.464844	0.453676	0.433424	0.427929	0.461701	0.436749	0.421888	0.426195	0.440219	0.448245	0.418225	0.431263	0.461899	0.462818	0.472398	0.482731	0.491799	0.489792	0.483258	0.473376	0.507348	0.541591	0.566763	0.564211	0.577598
0.395138	0.385839	0.363044	0.326805	0.317854	0.317344	0.317088	0.308401	0.346741	0.374076	0.384421	0.359766	0.367252	0.344891	0.37982	0.372835	0.354347	0.358062	0.359533	0.349851	0.340509	0.312912	0.316051	0.301382	0.313648	0.315363	0.317153	0.287083	0.282346	0.254057	0.254052	0.29491	0.295772	0.311709	0.294435	0.333983	0.359699	0.396677	0.379607	0.405375	0.409212	0.408832	0.40326	0.447304	0.485496	0.484993	0.514507	0.576319	0.600803	0.601696
0.369158	0.400437	0.415802	0.42089	0.442471	0.406155	0.404941	0.375281	0.418689	0.40432	0.421353	0.414419	0.425552	0.455516	0.412345	0.367941	0.352235	0.350684	0.338137	0.300985	0.266297	0.279784	0.259374	0.252784	0.258197	0.271785	0.270877	0.278975	0.278313	0.341486	0.332435	0.348136	0.33204	0.327392	0.328072	0.310223	0.334872	0.34535	0.365865	0.391343	0.445015	0.513121	0.55128	0.609266	0.654881	0.665476	0.701464	0.718594	0.757778	0.78022
0.529502	0.449454	0.443633	0.407191	0.402442	0.380282	0.384307	0.345702	0.331671	0.339036	0.359509	0.341502	0.344617	0.346835	0.341901	0.33756	0.338608	0.383391	0.372975	0.391627	0.419226	0.399357	0.402488	0.381411	0.38601	0.370633	0.355255	0.31304	0.324177	0.332231	0.300842	0.371915	0.381007	0.386955	0.430419	0.409631	0.441691	0.46033	0.488024	0.483415	0.508275	0.499593	0.523519	0.527618	0.556281	0.552256	0.549996	0.567603	0.639743	0.725148
																						0.576633	0.577383	0.562782	0.606146	0.586297	0.588871	0.577891	0.553339	0.547692	0.54161	0.510598	0.502796	0.511537	0.513694	0.463643	0.484933	0.465621	0.475448	0.453701	0.452713	0.45162	0.462554	0.474302	0.501088	0.491491	0.493514	0.540124	0.569656
0.599672	0.648057	0.628579	0.608654	0.620897	0.583125	0.566013	0.555442	0.527513	0.53277	0.524541	0.510246	0.508564	0.52231	0.521658	0.548093	0.528946	0.553245	0.551846	0.571124	0.545985	0.537478	0.52805	0.539435	0.526429	0.543034	0.542223	0.508891	0.515655	0.506535	0.500489	0.49268	0.536107	0.502112	0.485001	0.487222	0.479128	0.499269	0.542818	0.588437	0.649437	0.647536	0.610494	0.615922	0.649715	0.687648	0.68149	0.686196	0.711427	0.744906
0.536579	0.570925	0.571211	0.578378	0.597691	0.584394	0.58918	0.562749	0.56559	0.532151	0.523002	0.528227	0.519811	0.493818	0.505477	0.484624	0.485712	0.478792	0.476813	0.464468	0.465364	0.457295	0.454187	0.446526	0.444579	0.440915	0.431077	0.423019	0.416137	0.396979	0.401692	0.383773	0.391314	0.375232	0.383355	0.377628	0.35551	0.361357	0.363814	0.357704	0.365267	0.370788	0.372183	0.382421	0.383029	0.372755	0.372003	0.38569	0.414568	0.447072
0.399503	0.399556	0.407245	0.388566	0.422868	0.425886	0.442866	0.450422	0.445139	0.431803	0.443161	0.435066	0.432562	0.410628	0.392098	0.393669	0.425336	0.410114	0.402532	0.40445	0.426365	0.439566	0.460767	0.429352	0.422821	0.436472	0.429342	0.424352	0.422212	0.408503	0.415949	0.413927	0.404753	0.408156	0.408135	0.391589	0.358675	0.34923	0.333868	0.339367	0.350091	0.345212	0.352418	0.357924	0.360553	0.344357	0.356501	0.374367	0.397484	0.410307
0.580288	0.5608	0.493429	0.522444	0.50134	0.460652	0.497709	0.50473	0.496289	0.445432	0.397142	0.36027	0.366881	0.366247	0.369032	0.376642	0.33147	0.335128	0.334549	0.317814	0.312355	0.297407	0.305197	0.347406	0.330541	0.34539	0.364223	0.348046	0.372665	0.345656	0.333227	0.320363	0.353836	0.357043	0.361011	0.390784	0.397589	0.395973	0.403009	0.383903	0.384268	0.384286	0.411208	0.46193	0.47752	0.526469	0.53166	0.537733	0.584321	0.626268
0.467514	0.476165	0.530141	0.534356	0.544406	0.512524	0.468537	0.436921	0.431329	0.408733	0.40081	0.403718	0.381801	0.390215	0.387299	0.386705	0.372457	0.356635	0.339708	0.36374	0.335943	0.341537	0.357066	0.354258	0.353687	0.357103	0.367916	0.364127	0.381453	0.356158	0.357259	0.365174	0.374056	0.383386	0.37609	0.382001	0.391436	0.38847	0.392386	0.389026	0.420365	0.437136	0.462008	0.47314	0.506078	0.528345	0.538266	0.567388	0.620905	0.645703
0.556302	0.612629	0.560292	0.537789	0.503214	0.505904	0.472603	0.419196	0.421758	0.412227	0.418642	0.409453	0.401989	0.389743	0.391815	0.422811	0.412145	0.394355	0.412042	0.411356	0.403294	0.409488	0.418417	0.422181	0.427052	0.414984	0.42676	0.416405	0.410343	0.41095	0.405546	0.410042	0.396939	0.38953	0.378158	0.383222	0.370326	0.383254	0.372942	0.367173	0.370192	0.382111	0.404712	0.392709	0.387699	0.382837	0.397625	0.399698	0.415053	0.435847
0.575769	0.591325	0.600156	0.554605	0.547624	0.497454	0.502204	0.514816	0.488133	0.480189	0.473948	0.48091	0.458019	0.446049	0.471812	0.465063	0.477966	0.465362	0.46177	0.453504	0.468723	0.454436	0.456823	0.427053	0.423453	0.414136	0.40424	0.390085	0.391868	0.416164	0.413447	0.408526	0.396356	0.369304	0.356919	0.362331	0.35614	0.378733	0.353263	0.349107	0.347576	0.364427	0.355331	0.333506	0.31362	0.316862	0.332809	0.375792	0.446183	0.490979
0.443101	0.425674	0.431799	0.423394	0.413676	0.38807	0.412643	0.379028	0.370051	0.33851	0.312057	0.310114	0.311953	0.323146	0.325754	0.340818	0.357179	0.361811	0.35286	0.359196	0.37112	0.360842	0.38577	0.356416	0.337727	0.316189	0.323904	0.294546	0.276123	0.278826	0.265257	0.270983	0.26356	0.271179	0.284837	0.290237	0.288669	0.295587	0.29917	0.312292	0.325431	0.384141	0.428714	0.496198	0.528153	0.620453	0.655722	0.74454	0.836701	0.899455
0.415341	0.419195	0.434737	0.424006	0.419529	0.45197	0.448119	0.425634	0.403591	0.386132	0.38889	0.395631	0.392051	0.389044	0.37849	0.39313	0.389768	0.380084	0.37943	0.355211	0.351402	0.347688	0.324942	0.303009	0.301602	0.283324	0.286407	0.284749	0.281014	0.2752	0.290603	0.305315	0.310348	0.30475	0.29504	0.30546	0.291219	0.316077	0.324142	0.31675	0.299199	0.30337	0.293555	0.281441	0.293393	0.317577	0.336339	0.375202	0.442594	0.495406
0.4905	0.452942	0.386349	0.37067	0.369891	0.369778	0.387567	0.354077	0.33038	0.302914	0.282904	0.281353	0.279796	0.263324	0.274255	0.270643	0.282251	0.287322	0.277484	0.257189	0.255361	0.285203	0.273932	0.262877	0.290014	0.276169	0.291912	0.292941	0.294718	0.281554	0.29135	0.285654	0.318866	0.328829	0.323784	0.292926	0.289527	0.357587	0.44404	0.405068	0.374708	0.36144	0.332829	0.288287	0.333668	0.317379	0.374958	0.432397	0.519057	0.573885
0.524835	0.506387	0.473029	0.449129	0.495538	0.46048	0.449128	0.452849	0.45296	0.422345	0.439105	0.463033	0.453174	0.450593	0.47093	0.464152	0.467004	0.484203	0.476399	0.4856	0.474154	0.492342	0.477109	0.465023	0.472305	0.460324	0.458415	0.465539	0.434393	0.441081	0.426468	0.440687	0.431897	0.455044	0.442377	0.428196	0.423919	0.436358	0.413829	0.403514	0.395279	0.403273	0.393095	0.391468	0.3749	0.377908	0.375971	0.416452	0.454843	0.49739
									0.573334	0.537748	0.493131	0.470051	0.46205	0.461608	0.465246	0.44738	0.450402	0.455502	0.48033	0.492103	0.497508	0.500189	0.495925	0.489561	0.474897	0.475489	0.479875	0.482898	0.463352	0.485158	0.472837	0.463555	0.475743	0.466559	0.452994	0.441727	0.430541	0.454625	0.481487	0.438648	0.422829	0.451907	0.427953	0.439218	0.416628	0.412879	0.418536	0.453787	0.458695
																			0.600996	0.591749	0.551819	0.532246	0.556925	0.544255	0.571837	0.548334	0.518507	0.509788	0.489525	0.480996	0.449199	0.438142	0.429187	0.421092	0.407613	0.403903	0.404306	0.388942	0.391936	0.389641	0.380861	0.382618	0.369457	0.364521	0.361219	0.359997	0.353343	0.341552	0.35415
																								0.374091	0.334963	0.330794	0.320768	0.338033	0.344721	0.295373	0.286607	0.286737	0.30131	0.296629	0.268632	0.271985	0.279398	0.271652	0.261497	0.260532	0.270043	0.302863	0.340994	0.39241	0.397781	0.404876	0.406323	0.416704	0.458547
0.530622	0.483624	0.464697	0.45154	0.428079	0.414777	0.415311	0.447443	0.43946	0.451782	0.461956	0.456816	0.455082	0.452328	0.45315	0.464162	0.473283	0.468483	0.477179	0.459642	0.46389	0.486624	0.477152	0.467563	0.462375	0.458862	0.476075	0.45828	0.453897	0.435584	0.436624	0.422307	0.434151	0.443258	0.449227	0.452222	0.444104	0.452374	0.449924	0.445166	0.441074	0.439676	0.435358	0.453777	0.47479	0.483776	0.491642	0.519398	0.513213	0.514536
						0.671971	0.636249	0.553178	0.534275	0.537072	0.479005	0.475739	0.433599	0.416182	0.422964	0.435398	0.458221	0.4278	0.424334	0.420687	0.40755	0.389922	0.363078	0.372119	0.37487	0.385918	0.385312	0.379922	0.372303	0.357069	0.365331	0.351884	0.327254	0.3149	0.300379	0.275386	0.278849	0.290678	0.331224	0.312423	0.337333	0.359928	0.367902	0.430507	0.507597	0.584917	0.656455	0.760045	0.820827
0.448122	0.45538	0.440118	0.404308	0.356624	0.349721	0.320027	0.305733	0.30932	0.307466	0.296804	0.292773	0.311207	0.292245	0.29282	0.280081	0.279871	0.283891	0.282146	0.288983	0.276877	0.281807	0.281435	0.260136	0.255795	0.256026	0.264093	0.232434	0.237499	0.239763	0.23557	0.25043	0.260257	0.2752	0.270054	0.282609	0.259664	0.26555	0.284814	0.289922	0.303805	0.308718	0.317011	0.338208	0.326759	0.34207	0.351321	0.371394	0.419766	0.475475
0.438782	0.41098	0.38797	0.397038	0.366831	0.39422	0.39447	0.370512	0.381695	0.366104	0.380872	0.341404	0.338682	0.32849	0.330757	0.336974	0.36545	0.344841	0.320983	0.325719	0.328484	0.32329	0.323321	0.320841	0.319034	0.328111	0.334754	0.337325	0.314722	0.312727	0.314836	0.319424	0.301599	0.30058	0.309532	0.319245	0.301396	0.309023	0.320458	0.297424	0.29213	0.286815	0.2857	0.294499	0.319901	0.329498	0.352374	0.357369	0.405283	0.478019
0.593686	0.694447	0.679078	0.689848	0.617307	0.608792	0.588938	0.530169	0.504777	0.481337	0.475525	0.490716	0.530289	0.512294	0.486719	0.514266	0.491678	0.484479	0.494695	0.488688	0.477741	0.468983	0.459358	0.468858	0.447139	0.452607	0.451956	0.426712	0.420193	0.416194	0.412672	0.404552	0.40154	0.384714	0.421997	0.438298	0.448613	0.438395	0.45911	0.467577	0.482457	0.444574	0.430155	0.415485	0.404001	0.399961	0.38379	0.380335	0.390768	0.391219
		0.663881	0.713954	0.755426	0.790874	0.752606	0.66066	0.633179	0.594624	0.612136	0.559644	0.556444	0.520972	0.505212	0.487176	0.461752	0.440398	0.422849	0.40954	0.396916	0.399211	0.400366	0.39114	0.375423	0.356823	0.34416	0.367908	0.354845	0.350595	0.357769	0.352341	0.36759	0.343476	0.345655	0.351403	0.352581	0.350653	0.367583	0.370262	0.355631	0.369774	0.378515	0.356475	0.378818	0.376853	0.374474	0.409713	0.419003	0.451134
[truncated: 25 more columns]

## Sheet: DMSO_G1 (CDK4)
Time since mitogen stimulation (hr)
0.2	0.4	0.6	0.8	1	1.2	1.4	1.6	1.8	2	2.2	2.4	2.6	2.8	3	3.2	3.4	3.6	3.8	4	4.2	4.4	4.6	4.8	5	5.2	5.4	5.6	5.8	6	6.2	6.4	6.6	6.8	7	7.2	7.4	7.6	7.8	8	8.2	8.4	8.6	8.8	9	9.2	9.4	9.6	9.8	10
																				0.46633	0.48223	0.501454	0.392724	0.384151	0.411297	0.430451	0.41172	0.438042	0.428997	0.449687	0.459692	0.462402	0.453855	0.451532	0.432898	0.404462	0.401709	0.392258	0.393107	0.379814	0.390124	0.381851	0.426508	0.398245	0.469356	0.560459	0.807584	1.22215	1.33161
0.773638	0.763101	0.728963	0.686766	0.636536	0.609246	0.585513	0.578939	0.531219	0.519259	0.50492	0.50895	0.506886	0.541001	0.516554	0.509818	0.559591	0.531927	0.527685	0.568266	0.591705	0.579344	0.562507	0.551037	0.548488	0.591514	0.664609	0.981062	1.30893	1.33173	1.30663	1.19839	1.23313	1.1684	1.17903	1.14971	1.13609	1.11375	1.18567	1.24591	1.23039	1.17972	1.16049	1.20462	1.21925	1.14518	1.15532	1.12942	1.02314	1.0884
0.850431	0.684468	0.45621	0.441151	0.417591	0.417116	0.465664	0.437088	0.425604	0.427593	0.392726	0.398855	0.431618	0.406213	0.388591	0.372592	0.418553	0.43482	0.389926	0.361472	0.319799	0.388224	0.399243	0.348213	0.399372	0.36709	0.477287	0.402928	0.410636	0.400113	0.397817	0.464918	0.42324	0.493158	0.460321	0.520866	0.550131	0.662729	0.743137	0.812838	0.754029	0.769726	0.777635	0.701727	0.757475	0.7805	0.853653	0.807151	0.918049	0.877831
0.899542	0.883615	0.817248	0.758127	0.784779	0.871258	0.889777	1.02262	0.811876	0.920917	0.850777	0.797954	0.855932	0.82313	0.830258	0.870366	0.762987	0.722965	0.694547	0.67901	0.669729	0.613135	0.621392	0.603765	0.666951	0.632395	0.584204	0.596787	0.500346	0.558789	0.520444	0.531066	0.521161	0.553409	0.594926	0.530235	0.551726	0.525708	0.576568	0.544871	0.535381	0.525611	0.555151	0.575932	0.609943	0.685799	1.08592	1.17264	1.11525	1.19896
0.855491	0.856837	0.850795	0.778004	0.737447	0.666595	0.683752	0.662171	0.642459	0.593048	0.553717	0.486124	0.419371	0.405763	0.402038	0.43669	0.464218	0.454166	0.440386	0.431361	0.418413	0.464087	0.455044	0.446961	0.509175	0.537018	0.468731	0.456093	0.550504	0.496766	0.51312	0.480786	0.510152	0.540818	0.576262	0.583513	0.602595	0.739467	0.917944	0.978589	1.02142	0.925253	0.811032	0.810408	0.857183	0.952178	1.1396	1.22249	1.16527	1.10076
0.7013	0.594213	0.478229	0.409195	0.405183	0.384879	0.387018	0.37177	0.366173	0.350749	0.352918	0.331274	0.377321	0.408639	0.412059	0.417108	0.388576	0.398222	0.427829	0.40664	0.416017	0.408481	0.418999	0.373171	0.361685	0.336858	0.318892	0.316666	0.333363	0.307792	0.298579	0.305886	0.319822	0.313643	0.329327	0.327874	0.324165	0.332698	0.343848	0.349312	0.36764	0.413114	0.451946	0.562748	0.851732	1.02738	1.06478	1.04851	1.12034	1.06604
0.470348	0.417684	0.383035	0.34363	0.344652	0.340801	0.329882	0.325592	0.402408	0.398539	0.399121	0.371709	0.360298	0.349291	0.381976	0.365994	0.351689	0.346235	0.34957	0.337969	0.329903	0.312699	0.304996	0.290494	0.299193	0.316821	0.336397	0.318585	0.373109	0.483375	0.572827	0.689748	0.739785	0.738878	0.77519	0.835165	0.926836	0.978458	0.956182	0.98668	1.01672	0.896718	0.861104	0.898238	1.01467	0.979519	0.882796	0.907637	0.857992	0.818911
0.899542	0.883615	0.817248	0.758127	0.784779	0.871258	0.889777	1.02262	0.811876	0.920917	0.850777	0.797954	0.855932	0.82313	0.830258	0.870366	0.762987	0.722965	0.694547	0.67901	0.669729	0.613135	0.621392	0.603765	0.666951	0.632395	0.584204	0.596787	0.500346	0.558789	0.520444	0.531066	0.521161	0.553409	0.594926	0.530235	0.551726	0.525708	0.576568	0.544871	0.535381	0.525611	0.555151	0.575932	0.609943	0.685799	1.08592	1.17264	1.11525	1.19896
0.767148	0.687714	0.636675	0.628429	0.686985	0.636177	0.59764	0.619595	0.565627	0.582846	0.564002	0.534207	0.534377	0.5008	0.475574	0.478352	0.46059	0.485969	0.445995	0.46271	0.421103	0.448296	0.407554	0.417344	0.38311	0.399097	0.398126	0.400897	0.435535	0.467843	0.470612	0.471084	0.444429	0.39793	0.394735	0.397032	0.394515	0.40353	0.398886	0.403961	0.417451	0.419936	0.481526	0.761163	1.08869	1.08877	1.1277	1.19005	1.25611	1.20593
0.768584	0.765443	0.760185	0.696745	0.715335	0.729888	0.761193	0.733371	0.753937	0.735305	0.704073	0.670671	0.646577	0.576449	0.577666	0.560511	0.534259	0.531854	0.533755	0.511155	0.503249	0.510357	0.499064	0.469094	0.546072	0.486751	0.546199	0.550087	0.556449	0.575891	0.56187	0.593955	0.657956	0.647303	0.687114	0.749573	0.672274	0.686576	0.708217	0.682707	0.695179	0.704947	0.70028	0.733285	0.724185	0.713581	0.698133	0.772978	0.873527	0.995489
																0.642265	0.600753	0.597743	0.65928	0.690846	0.657575	0.6515	0.622082	0.598	0.533516	0.524813	0.535905	0.585558	0.584667	0.557205	0.5079	0.456617	0.49379	0.492589	0.465505	0.429833	0.414978	0.46145	0.566872	0.831985	1.08948	1.12676	1.17084	1.2072	1.24403	1.23293	1.2121	1.17718	1.18359
0.781705	0.766831	0.779563	0.687314	0.668907	0.617587	0.600384	0.620791	0.595236	0.646845	0.633495	0.605313	0.592463	0.598754	0.624848	0.611819	0.656785	0.654835	0.682412	0.660257	0.712921	0.65732	0.681066	0.659946	0.647585	0.631627	0.693264	0.779449	0.825342	0.842764	0.891798	0.807995	0.766111	0.719274	0.677347	0.699112	0.739824	0.786392	0.877604	0.877256	0.892569	0.837409	0.827181	0.845902	0.893969	0.969794	1.02361	1.01116	1.05936	1.10149
0.505823	0.601008	0.603543	0.614109	0.603798	0.681122	0.735323	0.712551	0.675973	0.65359	0.584857	0.59354	0.626035	0.637669	0.591008	0.582766	0.624001	0.625688	0.523666	0.603222	0.606404	0.579458	0.627953	0.653445	0.621161	0.667172	0.666023	0.650483	0.62443	0.572898	0.566015	0.554526	0.571295	0.573756	0.621135	0.655237	0.625754	0.680262	0.705927	0.678592	0.61962	0.587311	0.570807	0.652602	0.720271	0.795364	0.978059	1.19179	1.27074	1.42879
0.747854	0.738309	0.732019	0.786124	0.702792	0.709075	0.691176	0.691256	0.62175	0.641403	0.630219	0.648874	0.634595	0.619841	0.596438	0.608998	0.679177	0.667656	0.654692	0.665715	0.703383	0.696661	0.770384	0.620082	0.614476	0.759662	0.717159	0.701528	0.725401	0.756816	0.876524	0.867498	0.913071	0.895588	1.0103	1.0303	1.07272	1.0505	1.07094	1.10808	1.0266	1.1046	1.12301	1.13071	1.11094	1.06035	1.00148	1.01393	1.15386	1.25125
0.996748	0.859835	0.813732	0.785213	0.838301	0.8398	0.821329	0.78928	0.728997	0.845115	0.860652	0.859892	0.917573	0.779834	0.849573	0.811764	0.740135	0.688839	0.689661	0.636106	0.585051	0.598467	0.502699	0.47792	0.468733	0.487833	0.473009	0.459437	0.481307	0.482497	0.49185	0.522389	0.528519	0.549969	0.561731	0.539943	0.543091	0.549563	0.561417	0.58714	0.600155	0.617732	0.579414	0.610523	0.673508	0.790684	1.05683	1.16979	1.12924	1.15681
0.696998	0.665895	0.591802	0.551939	0.514534	0.503067	0.496323	0.452054	0.44067	0.440117	0.43833	0.441543	0.424521	0.406268	0.390678	0.401992	0.400586	0.370409	0.338687	0.350945	0.345774	0.31338	0.332135	0.34311	0.300201	0.300617	0.316833	0.300935	0.31998	0.331357	0.343251	0.36935	0.367202	0.396784	0.44038	0.537246	0.910826	1.24199	1.298	1.28251	1.33031	1.25834	1.18924	1.20755	1.32202	1.28881	1.2718	1.3551	1.37534	1.46843
					0.889595	0.845628	0.843561	0.803412	0.820963	0.739892	0.635293	0.586889	0.520335	0.486206	0.543501	0.524137	0.516936	0.497348	0.479893	0.486858	0.473628	0.489941	0.5294	0.524223	0.498037	0.496777	0.49616	0.544768	0.539564	0.532287	0.569798	0.563437	0.622606	0.558214	0.563055	0.565159	0.533212	0.517253	0.516889	0.534756	0.562311	0.713715	0.974847	1.06341	1.17182	1.19283	1.2472	1.22886	1.27095
														0.589771	0.604676	0.601514	0.577808	0.507586	0.51503	0.497515	0.497869	0.477924	0.459804	0.444764	0.43765	0.43483	0.443254	0.472833	0.425371	0.465112	0.455899	0.448301	0.45132	0.475194	0.495329	0.540041	0.651133	0.709126	0.709252	0.718296	0.709482	0.769987	0.841542	0.925998	0.967506	1.01877	1.04679	1.06984	1.17004
																						0.793848	0.764717	0.745164	0.700579	0.761548	0.758882	0.783999	0.756245	0.748398	0.715959	0.700732	0.674444	0.667543	0.64599	0.679492	0.651948	0.676993	0.703101	0.731956	0.790571	0.805057	0.818848	0.912025	0.84047	0.959486	1.02881	1.03921	1.11033
0.92024	0.964974	0.837855	0.862487	0.755773	0.795865	0.782588	0.754561	0.78258	0.78129	0.769173	0.768773	0.818385	0.721727	0.674596	0.658517	0.582821	0.579738	0.553649	0.521203	0.514522	0.508531	0.468926	0.499365	0.473071	0.451737	0.437496	0.47285	0.479837	0.454049	0.497174	0.506386	0.510504	0.507936	0.500988	0.517448	0.555824	0.543514	0.546162	0.540158	0.51363	0.535084	0.522171	0.55751	0.599451	0.778636	0.939468	0.991808	1.11759	1.19373
0.841708	0.810421	0.823445	0.715794	0.715677	0.694237	0.690185	0.617268	0.671444	0.666546	0.604339	0.594929	0.56166	0.584298	0.555406	0.547819	0.575225	0.534523	0.533374	0.516505	0.49737	0.513755	0.508609	0.511059	0.513604	0.489024	0.593028	0.91672	1.16344	1.25533	1.28265	1.28233	1.28246	1.32236	1.32816	1.27483	1.28573	1.32663	1.31795	1.36452	1.23093	1.17909	1.20087	1.30051	1.24703	1.23807	1.32893	1.26834	1.25519	1.20737
0.774349	0.83406	0.805277	0.806464	0.794513	0.805482	0.820495	0.800904	0.770604	0.718939	0.688681	0.713138	0.74888	0.751346	0.74751	0.754259	0.827315	0.750264	0.749342	0.711596	0.646916	0.706742	0.636833	0.595668	0.604481	0.60738	0.633457	0.599871	0.601243	0.579937	0.575766	0.645977	0.651759	0.637877	0.668343	0.660768	0.779525	0.872658	1.03529	1.20671	1.26037	1.3285	1.39915	1.44366	1.53914	1.50951	1.41318	1.35425	1.41104	1.37255
0.766415	0.708969	0.700023	0.686601	0.693539	0.628268	0.594411	0.574621	0.529555	0.473098	0.4539	0.418698	0.430162	0.447537	0.449133	0.411376	0.413225	0.438239	0.44703	0.453902	0.428471	0.440951	0.388941	0.339012	0.335832	0.356182	0.349362	0.327341	0.343716	0.345468	0.317236	0.317921	0.30721	0.329272	0.366094	0.44236	0.845096	1.20039	1.30788	1.47925	1.42432	1.39872	1.39099	1.26279	1.35644	1.35585	1.29184	1.23649	1.19007	1.17508
0.904174	0.829984	0.859336	0.799475	0.719975	0.743818	0.714315	0.783473	0.752667	0.742946	0.766943	0.75707	0.803782	0.74642	0.78559	0.837308	0.752544	0.800585	0.707514	0.675976	0.645227	0.553745	0.550482	0.531474	0.468034	0.400175	0.383965	0.354237	0.350058	0.283845	0.255697	0.211945	0.230309	0.227966	0.216642	0.227079	0.236222	0.287097	0.335687	0.430205	0.633247	0.770632	0.878956	0.838528	0.841442	0.926778	1.03665	1.18518	1.23651	1.31076
			0.82399	0.607246	0.532559	0.484663	0.487604	0.499016	0.494119	0.502893	0.483205	0.504036	0.50304	0.46595	0.465122	0.464452	0.517382	0.492756	0.483001	0.500024	0.489542	0.469385	0.514379	0.484274	0.47458	0.461605	0.448157	0.454944	0.504115	0.526878	0.494249	0.554497	0.493735	0.487362	0.514813	0.669543	0.79102	0.86778	0.861907	0.803194	0.758201	0.754017	0.810185	0.864888	0.999056	0.95409	1.10553	1.24909	1.07806
																						0.578851	0.562307	0.554942	0.532371	0.551269	0.578725	0.554963	0.573283	0.580116	0.627673	0.626607	0.638003	0.670227	0.654196	0.705338	0.676118	0.702373	0.720762	0.770096	0.814117	0.826916	0.864768	0.857138	0.82592	0.904194	1.13327	1.22474	1.24712
0.660855	0.587826	0.583995	0.476556	0.487099	0.44595	0.459844	0.43164	0.431189	0.408347	0.37937	0.392528	0.391321	0.423234	0.401935	0.405361	0.384379	0.372297	0.361555	0.379144	0.354356	0.346777	0.332862	0.33609	0.34638	0.346615	0.374302	0.414379	0.403051	0.401109	0.403549	0.412116	0.398412	0.413145	0.419513	0.480359	0.474377	0.506858	0.645356	0.836044	0.875596	0.885238	0.88211	0.935772	1.02136	0.993565	1.01918	1.04731	1.12721	1.0913
0.435205	0.395864	0.442555	0.389378	0.438719	0.445501	0.481624	0.427763	0.47366	0.482288	0.482927	0.463251	0.459927	0.441151	0.45243	0.428565	0.436497	0.427876	0.449843	0.46841	0.490198	0.443936	0.461627	0.490418	0.508001	0.465045	0.497742	0.511136	0.516437	0.551293	0.610005	0.617677	0.526778	0.608039	0.749986	0.889688	1.01353	1.02712	1.07777	1.08879	1.10574	1.09512	1.11474	1.08488	1.08819	1.09393	1.12754	1.12211	1.12893	1.10742
0.636787	0.556737	0.503162	0.464074	0.449585	0.457948	0.414566	0.404411	0.411924	0.417498	0.419845	0.42818	0.417329	0.387829	0.371148	0.369919	0.376944	0.399955	0.391876	0.378105	0.355076	0.364398	0.359785	0.354884	0.396983	0.397868	0.427332	0.408375	0.357041	0.429971	0.416424	0.403894	0.424277	0.412263	0.453889	0.448038	0.467618	0.473815	0.470456	0.382681	0.323305	0.292003	0.285088	0.387126	0.412761	0.37501	0.363891	0.458821	0.791742	1.00926
0.718232	0.659156	0.634153	0.619517	0.602181	0.548474	0.653615	0.699595	0.629288	0.611294	0.539036	0.530285	0.494093	0.533673	0.488437	0.436954	0.429611	0.433609	0.410798	0.419272	0.40099	0.390909	0.389164	0.378642	0.378408	0.376131	0.353561	0.369359	0.363828	0.367177	0.350493	0.374946	0.373193	0.373113	0.377208	0.380902	0.388289	0.423836	0.404045	0.388758	0.379285	0.370842	0.389077	0.417319	0.452159	0.462295	0.459426	0.465104	0.470997	0.668132
0.822677	0.816085	0.739631	0.712993	0.730328	0.677843	0.714585	0.670427	0.646431	0.650589	0.652933	0.62409	0.554691	0.489874	0.494423	0.459394	0.448486	0.42603	0.397169	0.394132	0.412601	0.406359	0.377578	0.407257	0.36315	0.353838	0.342178	0.342788	0.317919	0.333551	0.32072	0.315027	0.305217	0.334365	0.332468	0.336115	0.338886	0.318212	0.312542	0.32676	0.344412	0.344571	0.348428	0.402774	0.506946	0.563223	0.636192	0.70488	0.739365	0.793301
0.675053	0.613294	0.579166	0.505709	0.435933	0.363959	0.390166	0.382296	0.386376	0.394988	0.357629	0.379038	0.389606	0.416721	0.401146	0.387249	0.389396	0.4155	0.454341	0.465408	0.474008	0.477996	0.475594	0.541028	0.551466	0.5909	0.580051	0.54818	0.558944	0.49614	0.512337	0.494844	0.482044	0.512269	0.492757	0.486297	0.46959	0.473545	0.480423	0.489433	0.449278	0.464725	0.479464	0.496832	0.542347	0.625463	0.728889	0.896177	1.03558	1.0728
0.712425	0.588104	0.522397	0.615608	0.621596	0.630115	0.577904	0.586094	0.547361	0.510574	0.448741	0.464766	0.386389	0.37921	0.393383	0.423859	0.414798	0.407834	0.387401	0.43344	0.415056	0.444105	0.470647	0.472546	0.485138	0.475256	0.498922	0.435826	0.438017	0.428532	0.420407	0.441612	0.436365	0.458924	0.442256	0.426004	0.454773	0.603536	0.862027	0.919021	0.941103	0.92619	0.945928	0.926924	0.977956	1.01032	1.05476	1.04098	1.08316	0.998176
0.882469	0.853389	0.824422	0.751023	0.760259	0.684756	0.722455	0.644925	0.606957	0.552271	0.577022	0.544445	0.50931	0.516156	0.529298	0.524474	0.523339	0.515025	0.530881	0.555118	0.59061	0.573862	0.585589	0.560216	0.55182	0.530765	0.532568	0.561107	0.610821	0.567674	0.57048	0.768243	0.948199	0.969319	0.853718	0.858864	0.886034	0.966204	1.08499	1.15284	1.07058	1.06538	1.06734	1.05917	1.15249	1.34602	1.34347	1.40552	1.49155	1.37156
													0.544993	0.530273	0.577156	0.527706	0.485265	0.47496	0.46676	0.494864	0.521476	0.528507	0.459393	0.432251	0.393389	0.423393	0.475271	0.453915	0.492596	0.51117	0.636252	0.827651	0.961281	0.986653	0.970622	1.13768	1.23933	1.23198	1.22506	1.22929	1.20193	1.17507	1.20718	1.17656	1.1272	0.948566	1.07631	1.04029	1.11887
0.855491	0.856837	0.850795	0.778004	0.737447	0.666595	0.683752	0.662171	0.642459	0.593048	0.553717	0.486124	0.419371	0.405763	0.402038	0.43669	0.464218	0.454166	0.440386	0.431361	0.418413	0.464087	0.455044	0.446961	0.509175	0.537018	0.468731	0.456093	0.550504	0.496766	0.51312	0.480786	0.510152	0.540818	0.576262	0.583513	0.602595	0.739467	0.917944	0.978589	1.02142	0.925253	0.811032	0.810408	0.857183	0.952178	1.1396	1.22249	1.16527	1.10076
0.7013	0.594213	0.478229	0.409195	0.405183	0.384879	0.387018	0.37177	0.366173	0.350749	0.352918	0.331274	0.377321	0.408639	0.412059	0.417108	0.388576	0.398222	0.427829	0.40664	0.416017	0.408481	0.418999	0.373171	0.361685	0.336858	0.318892	0.316666	0.333363	0.307792	0.298579	0.305886	0.319822	0.313643	0.329327	0.327874	0.324165	0.332698	0.343848	0.349312	0.36764	0.413114	0.451946	0.562748	0.851732	1.02738	1.06478	1.04851	1.12034	1.06604
0.833099	0.796314	0.774056	0.728705	0.714123	0.713217	0.662283	0.658183	0.68547	0.699606	0.687877	0.686936	0.608747	0.62907	0.562381	0.543213	0.489237	0.451607	0.421461	0.438247	0.442746	0.455625	0.444935	0.474273	0.46899	0.509635	0.502989	0.522684	0.544786	0.535754	0.511939	0.555935	0.518884	0.525921	0.495511	0.461648	0.501232	0.547973	0.559439	0.590924	0.624359	0.767422	1.00271	1.13341	1.17527	1.24894	1.33476	1.38446	1.40617	1.27361
0.571387	0.552213	0.506451	0.499358	0.498969	0.439569	0.484288	0.431158	0.406766	0.396197	0.367265	0.364907	0.366651	0.354989	0.352457	0.330436	0.307507	0.300847	0.296215	0.270622	0.259109	0.244872	0.245915	0.220245	0.231249	0.216957	0.220037	0.212917	0.22329	0.221508	0.222607	0.243007	0.249475	0.265693	0.417467	0.810416	1.07549	1.1063	1.15634	1.15236	1.14659	1.16477	1.1422	1.11575	1.07825	1.0255	1.0451	1.05995	1.08596	1.01765
0.633931	0.680056	0.706694	0.625073	0.657143	0.650779	0.575453	0.595442	0.511867	0.491169	0.440044	0.442216	0.400099	0.379886	0.367603	0.332392	0.344014	0.318248	0.316345	0.305565	0.304782	0.300426	0.304156	0.287487	0.270701	0.281358	0.309421	0.314552	0.358548	0.331362	0.371705	0.348849	0.368906	0.377444	0.396148	0.365372	0.369331	0.393384	0.426111	0.542737	0.646072	0.764224	0.790749	0.936159	0.976449	1.10263	1.15794	1.31255	1.37387	1.33472
0.818246	0.866929	0.83739	0.842527	0.758841	0.719917	0.745858	0.695204	0.638064	0.64905	0.630602	0.709091	0.695837	0.637608	0.635484	0.618833	0.597851	0.542617	0.532369	0.506603	0.494681	0.521304	0.502823	0.478426	0.426469	0.402096	0.446757	0.42897	0.461893	0.476439	0.473785	0.428534	0.431249	0.416133	0.409409	0.394385	0.375822	0.418145	0.455979	0.498061	0.622524	0.754977	0.885082	0.811633	0.804145	0.830004	0.921015	0.863226	0.824231	0.857446
							0.8104	0.834367	0.84467	0.791916	0.714917	0.664629	0.628475	0.616871	0.586732	0.594821	0.574973	0.572761	0.520305	0.524007	0.524241	0.479626	0.485354	0.462056	0.430785	0.414552	0.413634	0.445124	0.471557	0.424196	0.425633	0.439293	0.46034	0.61562	0.869198	1.12624	1.23986	1.35073	1.3725	1.47193	1.38799	1.39941	1.47346	1.42233	1.36974	1.25405	1.25284	1.4229	1.32321
0.818093	0.731574	0.754415	0.764013	0.65926	0.728239	0.617582	0.680352	0.673309	0.730825	0.752481	0.714023	0.662323	0.637791	0.590302	0.572743	0.550489	0.569494	0.557093	0.552165	0.535774	0.627403	0.573707	0.547224	0.648973	0.604366	0.658738	0.631887	0.679672	0.619374	0.605342	0.558247	0.646238	0.709302	0.704511	0.677748	0.758413	0.905135	1.01765	1.01518	0.903579	0.990693	1.03475	0.934501	0.908394	0.958983	1.05115	1.12799	1.17943	1.15176
0.643943	0.592408	0.55646	0.546197	0.568382	0.578115	0.559087	0.548496	0.542422	0.508266	0.458724	0.40456	0.38459	0.405183	0.399969	0.421176	0.391169	0.377693	0.388462	0.381043	0.375028	0.369279	0.372826	0.364281	0.35641	0.394384	0.399311	0.385543	0.40611	0.40476	0.399986	0.361959	0.37747	0.401136	0.412201	0.394726	0.396231	0.382059	0.38883	0.485888	0.72883	0.836996	0.879394	0.853477	0.855102	0.806632	0.800387	0.95461	1.04435	1.09082
0.75547	0.804461	0.722399	0.768154	0.709035	0.703257	0.675861	0.649914	0.650678	0.626774	0.575711	0.537463	0.502288	0.542194	0.522942	0.486255	0.48204	0.45784	0.465961	0.46802	0.481133	0.493383	0.516498	0.501984	0.491902	0.513033	0.486793	0.391961	0.424065	0.408768	0.382586	0.386261	0.350336	0.378453	0.339806	0.303301	0.293331	0.284189	0.328495	0.358642	0.434109	0.462694	0.499761	0.603977	0.659234	0.686878	0.727836	0.705731	0.765485	0.757983
0.732815	0.632727	0.575417	0.557353	0.517215	0.54623	0.520069	0.468036	0.401145	0.40297	0.405171	0.398201	0.429185	0.414915	0.413062	0.396984	0.398003	0.416153	0.400044	0.415938	0.378515	0.383412	0.350798	0.340863	0.33812	0.334893	0.319768	0.3183	0.309129	0.330251	0.318767	0.341406	0.35563	0.367299	0.388036	0.412979	0.46782	0.518731	0.610174	0.689966	0.788114	0.82731	0.941864	1.00559	1.04739	1.12491	1.18886	1.21853	1.2017	1.22375
0.773638	0.763101	0.728963	0.686766	0.636536	0.609246	0.585513	0.578939	0.531219	0.519259	0.50492	0.50895	0.506886	0.541001	0.516554	0.509818	0.559591	0.531927	0.527685	0.568266	0.591705	0.579344	0.562507	0.551037	0.548488	0.591514	0.664609	0.981062	1.30893	1.33173	1.30663	1.19839	1.23313	1.1684	1.17903	1.14971	1.13609	1.11375	1.18567	1.24591	1.23039	1.17972	1.16049	1.20462	1.21925	1.14518	1.15532	1.12942	1.02314	1.0884
0.912554	0.781075	0.771768	0.786095	0.721833	0.746288	0.731712	0.744951	0.638282	0.602139	0.603878	0.563636	0.535137	0.490379	0.453559	0.417674	0.397385	0.374445	0.39508	0.38626	0.402198	0.431057	0.462747	0.450956	0.459051	0.443896	0.44284	0.425577	0.400282	0.40976	0.421682	0.399922	0.408931	0.419292	0.421466	0.425153	0.434463	0.468376	0.453763	0.454488	0.462722	0.49965	0.609947	0.727983	0.941697	1.03896	1.12526	1.1079	1.08973	1.11481
0.790809	0.785569	0.710319	0.656215	0.621105	0.619409	0.591358	0.5555	0.553238	0.516754	0.479653	0.417419	0.450653	0.387862	0.38105	0.371099	0.386547	0.406512	0.400974	0.436257	0.397833	0.391973	0.434967	0.456896	0.451034	0.459553	0.469449	0.535964	0.508832	0.519721	0.495389	0.510447	0.542239	0.575064	0.605243	0.677895	0.76083	0.835138	0.898879	0.905405	0.881419	0.842661	0.804204	0.800855	0.894909	0.849422	0.862471	0.840303	0.969599	0.993724
0.850052	0.639844	0.647198	0.707467	0.672852	0.713129	0.678811	0.608025	0.646696	0.612748	0.634945	0.623465	0.586218	0.590033	0.615441	0.586249	0.587059	0.589642	0.584523	0.583161	0.579001	0.597476	0.58348	0.556543	0.531608	0.518947	0.501021	0.500999	0.483144	0.485871	0.502112	0.499686	0.506202	0.526811	0.674945	0.912866	1.02966	1.02545	1.03498	1.0242	1.05544	1.01238	0.979913	1.01426	1.05133	1.0601	1.07673	1.05941	1.10881	1.08647
0.814235	0.717552	0.617315	0.59295	0.573471	0.502975	0.476436	0.452221	0.406251	0.399724	0.391315	0.340909	0.341583	0.331045	0.302485	0.292383	0.331956	0.335078	0.332392	0.352674	0.373989	0.386409	0.354271	0.34996	0.336594	0.341066	0.351552	0.335318	0.324014	0.317708	0.317211	0.306948	0.322244	0.323433	0.315027	0.311985	0.329829	0.420614	0.831266	1.04315	1.05473	1.06268	1.03724	1.06986	1.06628	1.09845	1.14428	1.20281	1.21147	1.27606
0.855434	0.788193	0.684255	0.688041	0.563971	0.585876	0.580292	0.597158	0.591699	0.600722	0.627356	0.614132	0.642289	0.610518	0.582731	0.564548	0.582002	0.548641	0.526955	0.519054	0.517615	0.501078	0.44625	0.421577	0.427168	0.429626	0.410546	0.41734	0.409563	0.373489	0.391935	0.368891	0.339754	0.321875	0.32539	0.31794	0.315997	0.299382	0.307889	0.319755	0.335217	0.362797	0.408234	0.456998	0.500635	0.606231	0.771755	0.828065	0.892786	0.904533
0.750795	0.665982	0.780768	0.874856	0.808063	0.828628	0.744688	0.773171	0.745436	0.713891	0.692509	0.699381	0.661751	0.610791	0.616779	0.55097	0.547529	0.551151	0.531644	0.546199	0.4931	0.494268	0.489991	0.453416	0.422616	0.456166	0.460196	0.437217	0.462301	0.45048	0.519714	0.472526	0.529434	0.621901	0.665508	0.625951	0.69345	0.766867	0.734429	0.810658	0.882857	0.966998	0.980462	1.00177	1.1294	1.18928	1.31578	1.31922	1.35016	1.22717
0.812743	0.828037	0.716472	0.74543	0.78116	0.727188	0.660438	0.693014	0.632811	0.642895	0.626662	0.596994	0.582973	0.571731	0.568445	0.529883	0.568214	0.531401	0.531747	0.535701	0.542305	0.49293	0.48104	0.490846	0.465388	0.45175	0.429113	0.436368	0.443023	0.418223	0.455185	0.406129	0.466268	0.426833	0.442812	0.435556	0.440122	0.45019	0.459376	0.469849	0.470755	0.483445	0.496035	0.543823	0.588703	0.65893	0.772378	0.991061	1.17261	1.24883
0.845052	0.810695	0.748388	0.740194	0.800849	0.743908	0.799718	0.756914	0.759006	0.7173	0.667828	0.653864	0.704368	0.674732	0.629022	0.618588	0.603086	0.582718	0.576891	0.57539	0.550484	0.551654	0.538463	0.517471	0.546024	0.559317	0.57622	0.539086	0.533679	0.525939	0.522121	0.5333	0.610507	0.706239	0.814959	0.859191	0.849894	0.802205	0.788974	0.775928	0.7999	0.841643	0.914828	1.04433	1.07508	1.04378	1.01381	0.978771	0.941462	0.997802
0.867175	0.67564	0.603065	0.613327	0.58786	0.613614	0.598443	0.62183	0.607533	0.663456	0.645232	0.589873	0.582176	0.574626	0.621714	0.59505	0.681043	0.649332	0.702044	0.684872	0.632979	0.638265	0.584635	0.648721	0.705959	0.638674	0.659133	0.622173	0.572924	0.583736	0.571513	0.551631	0.567734	0.576144	0.568702	0.568331	0.599865	0.799268	1.14469	1.25941	1.2821	1.27993	1.24591	1.23819	1.19052	1.20094	1.26908	1.35008	1.23907	1.31429
0.898096	0.867091	0.854574	0.845991	0.885588	0.986119	0.892834	0.874822	0.817927	0.761847	0.787251	0.731903	0.663639	0.630436	0.680567	0.629597	0.62303	0.599341	0.500332	0.507172	0.507698	0.507329	0.487774	0.475344	0.502772	0.458234	0.477417	0.465776	0.496592	0.728887	1.01586	1.13463	1.01298	1.05164	1.06359	1.07198	1.06742	0.998921	0.950687	0.880616	0.894161	0.878369	0.910271	0.96377	0.988404	1.04061	1.06729	1.15329	1.18647	1.1795
0.875041	0.949128	1.01656	0.939124	0.989831	0.972893	1.03244	0.964188	0.917359	0.741338	0.805504	0.776433	0.750431	0.823951	0.695733	0.801885	0.898544	0.835413	0.770573	0.747076	0.658162	0.827009	0.72645	0.780803	0.787695	0.717007	0.736003	0.720506	0.72433	0.656889	0.643112	0.607691	0.671102	0.614839	0.664737	0.651943	0.649761	0.67346	0.728422	0.785141	0.808734	0.866561	1.01811	1.02773	1.07653	1.15194	1.05814	1.04251	0.93888	0.871858
0.7852	0.821382	0.80661	0.836727	0.776858	0.726282	0.53996	0.634201	0.533914	0.492594	0.527228	0.504301	0.529921	0.484374	0.456773	0.55125	0.628082	0.459142	0.458536	0.471064	0.447702	0.443747	0.460671	0.458941	0.465548	0.45998	0.434213	0.44238	0.477817	0.517459	0.608166	0.912187	1.18923	1.31697	1.41414	1.38006	1.35848	1.30852	1.16792	1.19218	1.29983	1.40517	1.28665	1.37531	1.45618	1.51155	1.5226	1.66097	1.65684	1.88409
0.485946	0.469891	0.461969	0.410938	0.373366	0.343488	0.329087	0.336362	0.336002	0.320099	0.284072	0.233981	0.229554	0.220022	0.205783	0.215292	0.203755	0.214015	0.215729	0.243107	0.242608	0.242968	0.247514	0.252073	0.257211	0.247381	0.261472	0.255051	0.25055	0.266329	0.457564	0.695805	0.851978	0.834443	0.892943	0.874706	0.936018	1.06595	1.12106	1.11615	1.09852	1.12934	1.11199	1.17	1.35814	1.26359	1.32054	1.3613	1.38942	1.45431
0.788997	0.778723	0.864863	0.765715	0.764982	0.860158	0.909037	0.991729	0.930369	0.929348	0.897284	0.861008	0.90122	0.775176	0.748054	0.628398	0.607301	0.622897	0.541506	0.453371	0.524182	0.584276	0.470219	0.46203	0.461773	0.447871	0.521403	0.521102	0.476803	0.443507	0.41671	0.436134	0.487598	0.483449	0.493565	0.593691	0.62296	0.627264	0.690484	0.741034	0.835026	1.0025	1.09573	1.12743	1.1966	1.21135	1.21601	1.33707	1.32293	1.31933
0.758599	0.770404	0.798952	0.74263	0.789404	0.757991	0.781738	0.743373	0.738609	0.782953	0.739193	0.697597	0.655744	0.636901	0.618985	0.613366	0.588795	0.630334	0.609597	0.636497	0.632143	0.646905	0.697429	0.714475	0.719014	0.711403	0.678546	0.604774	0.618125	0.611571	0.632432	0.654741	0.638463	0.636703	0.618459	0.623326	0.606648	0.57851	0.586422	0.563411	0.563996	0.514453	0.521916	0.534835	0.578708	0.762013	0.993083	1.0782	1.10251	1.07785
0.661098	0.730521	0.582087	0.564521	0.547994	0.566815	0.554141	0.579949	0.56012	0.566313	0.575552	0.548634	0.490294	0.586741	0.499096	0.476617	0.458267	0.460539	0.421621	0.398857	0.408231	0.480511	0.451628	0.362633	0.407142	0.428613	0.424818	0.422492	0.471097	0.439691	0.627442	0.431292	0.518558	0.390591	0.565064	0.556425	0.622879	0.728187	0.846729	0.748718	0.818039	0.935631	1.20361	0.972913	0.953887	0.898991	0.945023	0.985311	1.05362	1.05019
0.818444	0.802201	0.820895	0.764856	0.76451	0.714711	0.725635	0.774612	0.728268	0.764708	0.749751	0.754668	0.745438	0.714841	0.631454	0.631312	0.567827	0.570771	0.565456	0.560362	0.586463	0.577511	0.540946	0.510946	0.509478	0.417746	0.423602	0.385126	0.364201	0.35993	0.34927	0.297949	0.305822	0.322591	0.38561	0.417219	0.475973	0.615345	0.707901	0.780527	0.776474	0.79664	0.826251	0.819457	0.776323	0.773263	0.74482	0.704385	0.824651	0.895427
										0.396058	0.358283	0.382248	0.368685	0.374808	0.411331	0.38454	0.410096	0.432852	0.437499	0.437176	0.46392	0.486206	0.511111	0.463164	0.456951	0.494952	0.494478	0.426646	0.396927	0.416502	0.486601	0.482278	0.528811	0.559437	0.585348	0.558186	0.57551	0.575243	0.576758	0.612887	0.670927	0.810483	0.981841	1.07479	1.13367	1.25168	1.27303	1.33361	1.41824
																				0.806998	0.914131	0.863577	0.905817	0.978056	0.92735	0.936559	0.91334	0.872759	0.887394	0.91017	0.983501	0.909626	0.902253	0.861677	0.87518	0.837779	0.771688	0.779318	0.740922	0.815758	0.697812	0.722987	0.626937	0.636988	0.631521	0.837855	1.07791	1.26539	1.30211
																						0.587543	0.599341	0.676793	0.629097	0.613048	0.527906	0.494396	0.50114	0.465462	0.500071	0.457519	0.384297	0.374001	0.339173	0.324061	0.360249	0.31723	0.360722	0.365734	0.365135	0.414723	0.403202	0.458144	0.499709	0.557199	0.660422	0.665954	0.854039
																							0.702066	0.704292	0.666093	0.609116	0.583587	0.649042	0.581202	0.629396	0.501448	0.518203	0.527428	0.494277	0.45059	0.52879	0.549252	0.616828	0.8634	1.05655	1.29976	1.14848	1.3266	1.24674	1.31738	1.28087	1.18611	1.18743	1.33343
0.893722	0.840846	0.788746	0.75271	0.721133	0.623113	0.659583	0.55777	0.544294	0.530868	0.472223	0.470496	0.512076	0.441825	0.473127	0.428639	0.475954	0.491712	0.493969	0.485842	0.508237	0.497916	0.508598	0.54139	0.488788	0.503332	0.486708	0.481114	0.4562	0.453091	0.449369	0.470614	0.495092	0.516883	0.526293	0.561221	0.640136	0.787284	0.897502	0.900112	0.995344	1.03375	1.06855	1.07017	1.08661	1.09067	1.12117	1.11467	1.16353	1.10809
0.743913	0.720221	0.560485	0.591081	0.55668	0.576421	0.581745	0.550624	0.555543	0.54868	0.468672	0.570692	0.511458	0.492795	0.486295	0.48073	0.464091	0.549321	0.503639	0.507012	0.515328	0.499462	0.548508	0.545675	0.584576	0.526141	0.547449	0.487119	0.447266	0.48184	0.479704	0.402583	0.376158	0.38318	0.352007	0.345191	0.349487	0.401126	0.42205	0.476106	0.487455	0.570892	0.619966	0.852927	0.971239	0.974983	1.07926	1.19721	1.22003	1.1552
0.866324	0.855269	0.854612	0.819875	0.72026	0.675319	0.614742	0.605399	0.578076	0.529262	0.525463	0.537433	0.529868	0.550389	0.546108	0.495007	0.507225	0.506597	0.485077	0.463992	0.467152	0.455868	0.472765	0.479937	0.525994	0.508089	0.4825	0.447352	0.458569	0.561612	0.733204	0.86312	0.914649	0.897323	1.04923	1.0847	1.12943	1.10163	1.10313	1.06715	1.0659	1.16708	1.08481	1.00256	1.04449	1.09677	1.05708	1.08873	1.07015	1.03773
0.752633	0.725828	0.752017	0.718716	0.708417	0.650384	0.620052	0.604162	0.568027	0.54534	0.562949	0.551741	0.524783	0.521228	0.510996	0.532002	0.51411	0.51161	0.476162	0.467713	0.474483	0.456344	0.452641	0.453627	0.431551	0.42592	0.37479	0.381049	0.369597	0.417918	0.449214	0.500834	0.584231	0.708847	0.791472	0.822918	0.863563	0.872489	0.897066	0.88943	0.945283	0.977639	1.10456	1.11835	1.15939	1.24737	1.25035	1.27726	1.22591	1.23351
0.3245	0.242993	0.23084	0.25254	0.296089	0.357018	0.389864	0.417966	0.465919	0.485361	0.46106	0.422476	0.410474	0.412823	0.39582	0.34233	0.342032	0.323929	0.338946	0.342737	0.354206	0.343011	0.35464	0.339894	0.361959	0.368202	0.354495	0.353368	0.343049	0.387073	0.346296	0.316861	0.348948	0.323074	0.330861	0.326944	0.329547	0.33803	0.352644	0.371617	0.414008	0.633318	0.889032	0.825182	0.899157	0.916278	1.07611	1.00453	0.983987	1.05837
0.77986	0.741301	0.684253	0.594943	0.580522	0.568166	0.519607	0.542841	0.523218	0.502132	0.493007	0.456366	0.443843	0.485815	0.465887	0.444459	0.452981	0.455609	0.415751	0.4248	0.42277	0.437328	0.445506	0.463634	0.509436	0.485234	0.468668	0.501993	0.516283	0.540472	0.673243	0.760053	0.744469	0.771999	0.713147	0.711723	0.662888	0.63857	0.59288	0.514963	0.497343	0.560322	0.699165	0.779071	0.825431	0.846844	0.845233	0.870326	0.866014	0.868344
0.646092	0.812052	0.733837	0.686251	0.77203	0.730732	0.685247	0.680797	0.671266	0.679569	0.651897	0.698432	0.670498	0.65465	0.636981	0.635827	0.587848	0.591254	0.616467	0.576672	0.571677	0.621017	0.604569	0.557131	0.549881	0.533177	0.526862	0.536368	0.484927	0.488747	0.507989	0.472657	0.447933	0.461338	0.4809	0.47412	0.472933	0.475403	0.460175	0.473254	0.626643	0.923143	1.10265	1.08139	1.05989	1.08551	1.10293	1.08728	1.04039	1.01534
																							0.694151	0.644923	0.665114	0.629554	0.657668	0.629287	0.641877	0.691575	0.739381	0.874375	0.981286	1.07408	1.02491	1.08735	1.10938	1.14912	1.20315	1.22023	1.39883	1.38625	1.34126	1.33974	1.40336	1.4364	1.45438	1.49425	1.47113
0.470348	0.417684	0.383035	0.34363	0.344652	0.340801	0.329882	0.325592	0.402408	0.398539	0.399121	0.371709	0.360298	0.349291	0.381976	0.365994	0.351689	0.346235	0.34957	0.337969	0.329903	0.312699	0.304996	0.290494	0.299193	0.316821	0.336397	0.318585	0.373109	0.483375	0.572827	0.689748	0.739785	0.738878	0.77519	0.835165	0.926836	0.978458	0.956182	0.98668	1.01672	0.896718	0.861104	0.898238	1.01467	0.979519	0.882796	0.907637	0.857992	0.818911
0.490215	0.484901	0.512566	0.470472	0.481482	0.47132	0.444271	0.362546	0.401995	0.397063	0.403249	0.391089	0.430035	0.51014	0.427978	0.380488	0.385519	0.35736	0.379324	0.332733	0.28777	0.289569	0.280016	0.251645	0.274071	0.275902	0.278327	0.294294	0.303196	0.375167	0.394084	0.422165	0.424047	0.524136	0.75033	0.8324	0.902854	0.948387	0.885747	0.919476	0.905756	0.929594	0.963143	1.00066	1.01775	0.969138	1.03603	0.995079	0.996316	1.01063
0.71334	0.485536	0.372499	0.375306	0.360994	0.377266	0.378238	0.380225	0.374768	0.344828	0.360527	0.294532	0.284353	0.281704	0.282695	0.319683	0.351712	0.378677	0.381162	0.449906	0.473018	0.474433	0.472879	0.489147	0.456081	0.433179	0.422147	0.388693	0.411768	0.407416	0.36873	0.463486	0.481164	0.481507	0.561622	0.490608	0.602054	0.616769	0.709733	0.73086	0.811967	0.850865	0.957808	1.02688	1.1346	1.134	1.1523	1.22309	1.38994	1.43352
																						0.652902	0.728481	0.768844	0.747203	0.686469	0.70842	0.828672	0.712006	0.650797	0.648515	0.609428	0.569013	0.568399	0.571738	0.553418	0.579918	0.590338	0.640618	0.677718	0.670876	0.754516	0.961909	1.14815	1.25523	1.27872	1.20388	1.26782	1.19248
0.904569	0.899894	0.839326	0.784033	0.798277	0.73559	0.814076	0.876182	0.759239	0.761842	0.740079	0.666799	0.772694	0.889916	0.891525	0.848471	0.821136	0.859963	0.771275	0.72651	0.720331	0.758933	0.774377	0.844827	0.831403	0.830653	0.823915	0.794427	0.776845	0.768938	0.784284	0.768945	0.839196	0.87057	0.849691	0.860842	0.823586	0.769391	0.787051	0.777325	0.847686	0.883713	0.922255	0.900069	0.95708	1.06331	1.09874	1.21196	1.24681	1.40662
0.925185	0.920098	0.906581	0.925337	0.917667	0.961887	0.916679	0.913827	0.941542	0.92905	0.922591	0.863085	0.782717	0.782525	0.8132	0.795269	0.757234	0.711069	0.772378	0.744685	0.721768	0.773018	0.788989	0.788632	0.762696	0.737445	0.740933	0.74373	0.760253	0.753443	0.750914	0.710319	0.702439	0.679206	0.68817	0.704087	0.665972	0.673701	0.728979	0.684933	0.704013	0.748588	0.734207	0.737091	0.764821	0.836414	0.971569	1.03269	1.10908	1.12839
0.515706	0.473486	0.43855	0.420485	0.44105	0.415447	0.430735	0.414731	0.436801	0.444016	0.443683	0.44633	0.46555	0.422893	0.408147	0.477923	0.542682	0.595367	0.544255	0.496164	0.575175	0.525759	0.566459	0.553664	0.526856	0.53008	0.526693	0.538258	0.499255	0.486491	0.494415	0.532765	0.634149	0.626485	0.599303	0.517764	0.517225	0.505657	0.50793	0.521104	0.548336	0.56578	0.619335	0.738279	0.822808	0.938937	1.04788	1.15846	1.21591	1.16456
0.744626	0.714279	0.568934	0.589977	0.59616	0.457394	0.500108	0.470224	0.474814	0.399666	0.389842	0.383862	0.399053	0.441121	0.394055	0.387871	0.350468	0.329544	0.364291	0.30815	0.319364	0.31042	0.316622	0.352483	0.34322	0.371945	0.397152	0.382728	0.372549	0.382781	0.389177	0.382902	0.428979	0.431574	0.4137	0.457972	0.48257	0.552031	0.631955	0.809865	0.964903	1.10743	1.32607	1.23531	1.18014	1.23171	1.24122	1.37218	1.48514	1.52093
0.596015	0.588488	0.578627	0.589343	0.565109	0.5071	0.454954	0.410393	0.413526	0.388044	0.363993	0.346301	0.359171	0.388939	0.382402	0.418586	0.402926	0.399748	0.420749	0.414612	0.424437	0.399251	0.426961	0.426332	0.427212	0.428357	0.427975	0.440315	0.489977	0.469074	0.453206	0.460559	0.467532	0.49939	0.492524	0.508619	0.604776	0.727882	0.997819	1.15953	1.17759	1.16765	1.19418	1.19052	1.15385	1.26667	1.15672	1.12909	1.17479	1.26398
0.710909	0.672549	0.624864	0.573172	0.522815	0.530588	0.520558	0.454899	0.481503	0.495576	0.507212	0.457104	0.450274	0.422467	0.44811	0.435435	0.467615	0.442374	0.444634	0.466245	0.429719	0.422866	0.395855	0.403337	0.410465	0.406028	0.467091	0.540455	0.48756	0.438624	0.434006	0.473815	0.49259	0.493237	0.484879	0.436659	0.448097	0.484095	0.54375	0.466184	0.565075	0.494865	0.611486	0.556261	0.571609	0.534969	0.507826	0.549473	0.784347	0.998667
0.797644	0.759029	0.695411	0.696571	0.648233	0.59874	0.646158	0.590653	0.564997	0.540233	0.543521	0.531158	0.525691	0.507915	0.497919	0.502644	0.534947	0.525454	0.485853	0.499586	0.49041	0.472283	0.473866	0.477261	0.445469	0.422705	0.449963	0.428668	0.405835	0.400647	0.395129	0.419412	0.421794	0.419395	0.398674	0.435729	0.443243	0.452621	0.478614	0.615605	0.843117	0.982819	1.01811	0.884196	0.898398	0.8596	0.931864	1.00696	1.01935	1.03483
0.638448	0.558506	0.540725	0.49601	0.471695	0.45821	0.472502	0.447334	0.443233	0.38927	0.34622	0.342159	0.338178	0.384074	0.365877	0.36877	0.392832	0.385194	0.373475	0.370747	0.401917	0.37139	0.382908	0.365968	0.349831	0.307449	0.34042	0.311367	0.294853	0.305925	0.296493	0.31933	0.338731	0.47274	0.713036	0.834083	0.918761	0.856921	0.880125	0.918567	0.952355	1.03001	1.04044	1.0645	1.1144	1.16973	1.13497	1.1632	1.18625	1.23209
0.644723	0.612903	0.603915	0.57825	0.57373	0.652571	0.625652	0.584552	0.538914	0.527263	0.528876	0.548536	0.50276	0.522442	0.495809	0.4848	0.4531	0.434916	0.461201	0.385266	0.38347	0.377497	0.378617	0.37642	0.362197	0.334675	0.350734	0.357598	0.368247	0.329498	0.345662	0.330863	0.387604	0.385518	0.411005	0.433738	0.411387	0.431987	0.426667	0.453396	0.478308	0.484552	0.580755	0.81204	0.968278	1.06266	1.07081	1.14952	1.28364	1.29326
0.850431	0.684468	0.45621	0.441151	0.417591	0.417116	0.465664	0.437088	0.425604	0.427593	0.392726	0.398855	0.431618	0.406213	0.388591	0.372592	0.418553	0.43482	0.389926	0.361472	0.319799	0.388224	0.399243	0.348213	0.399372	0.36709	0.477287	0.402928	0.410636	0.400113	0.397817	0.464918	0.42324	0.493158	0.460321	0.520866	0.550131	0.662729	0.743137	0.812838	0.754029	0.769726	0.777635	0.701727	0.757475	0.7805	0.853653	0.807151	0.918049	0.877831
0.83239	0.712551	0.665741	0.643098	0.666582	0.627313	0.618509	0.594532	0.596886	0.582198	0.579226	0.582296	0.575035	0.579073	0.536013	0.574453	0.557118	0.531473	0.54658	0.511452	0.499549	0.506504	0.508427	0.480173	0.488518	0.483755	0.472194	0.483632	0.477957	0.471046	0.491866	0.480152	0.465982	0.481013	0.481061	0.52532	0.630194	0.795331	0.980455	1.01691	1.14513	1.15824	1.18629	1.17257	1.20458	1.18544	1.19678	1.19902	1.27444	1.28944
									0.679346	0.63788	0.565525	0.535974	0.514175	0.532611	0.533405	0.508072	0.528009	0.546155	0.576883	0.52135	0.541146	0.561102	0.523894	0.512454	0.514147	0.510799	0.541537	0.510084	0.488916	0.493383	0.485392	0.484572	0.497142	0.491358	0.522408	0.519944	0.530671	0.525463	0.508132	0.499063	0.517643	0.478403	0.44944	0.421281	0.44511	0.442689	0.434677	0.457616	0.485328
																			0.812308	0.792135	0.751559	0.739442	0.796685	0.788919	0.787187	0.713358	0.727602	0.713998	0.736761	0.725857	0.686649	0.655726	0.689017	0.643857	0.685838	0.713986	0.644091	0.684594	0.709794	0.751046	0.702396	0.7069	0.746615	0.715062	0.705898	0.687381	0.724724	0.74437	0.825398
																								0.394653	0.401838	0.497086	0.502434	0.513007	0.535006	0.436329	0.376972	0.426491	0.509632	0.459332	0.457462	0.449852	0.433837	0.444608	0.440042	0.441413	0.455468	0.630191	0.789252	0.924323	0.975353	1.0516	1.06152	0.990445	0.976664
0.750908	0.591108	0.553209	0.538796	0.504104	0.451211	0.40622	0.448635	0.481886	0.49158	0.501524	0.531633	0.52729	0.48334	0.496873	0.50371	0.529163	0.516727	0.585133	0.576323	0.621343	0.576578	0.60282	0.601881	0.598799	0.592708	0.675271	0.615437	0.671302	0.642881	0.654533	0.640212	0.689341	0.631238	0.571735	0.492959	0.496883	0.54088	0.561713	0.475125	0.485794	0.497776	0.570709	0.680036	0.793284	0.880913	0.822906	0.734606	0.65145	0.658922
						0.647461	0.707909	0.726035	0.894866	0.915785	0.85777	0.857639	0.737946	0.67541	0.707787	0.762224	0.760131	0.671157	0.613937	0.576059	0.533957	0.492391	0.482336	0.52982	0.499601	0.534036	0.60661	0.574555	0.578534	0.535312	0.541559	0.481256	0.452085	0.389197	0.396607	0.365339	0.358576	0.382664	0.512794	0.562823	0.84628	1.02239	1.16727	1.14766	1.15697	1.20854	1.29213	1.31565	1.48008
0.636626	0.633328	0.6037	0.530209	0.446378	0.416925	0.326689	0.334822	0.33091	0.332669	0.309305	0.281197	0.289252	0.277676	0.260726	0.27564	0.273369	0.283126	0.278368	0.298582	0.31821	0.3183	0.332028	0.324277	0.320911	0.314984	0.30175	0.266801	0.25541	0.267556	0.257201	0.258467	0.267399	0.272893	0.285503	0.274714	0.255946	0.260548	0.298107	0.305371	0.332127	0.382251	0.434887	0.62821	0.858266	1.01123	1.04161	1.10989	1.1225	1.14702
0.625514	0.587876	0.539869	0.55908	0.52675	0.561873	0.587262	0.528243	0.54975	0.535577	0.567129	0.505827	0.464962	0.45629	0.430649	0.412375	0.415351	0.404479	0.422484	0.360002	0.360478	0.351327	0.359506	0.426966	0.430701	0.43649	0.461555	0.472766	0.452442	0.414068	0.429848	0.379586	0.408952	0.388585	0.368423	0.389756	0.443576	0.366499	0.384218	0.355419	0.372192	0.404786	0.467364	0.48859	0.570664	0.699416	0.838423	0.858258	0.972154	1.00474
0.910148	0.895521	0.966963	0.895996	0.824638	0.767045	0.736457	0.635093	0.653104	0.606754	0.639565	0.60794	0.637155	0.559679	0.662996	0.697571	0.637332	0.602281	0.613748	0.613184	0.65048	0.524938	0.558271	0.643359	0.61087	0.623325	0.614349	0.608044	0.599813	0.594282	0.560541	0.601163	0.606799	0.589705	0.597549	0.599205	0.62381	0.625864	0.677968	0.766742	0.85845	0.995783	0.890903	0.836143	0.727203	0.715382	0.693776	0.807417	0.848313	0.989751
		0.941862	0.936337	0.933856	0.917687	0.821122	0.772344	0.764757	0.742438	0.702676	0.678181	0.654688	0.604048	0.629706	0.579256	0.580529	0.580593	0.560436	0.548454	0.550692	0.503726	0.551723	0.596925	0.571383	0.542225	0.52557	0.539263	0.555669	0.525018	0.502299	0.497423	0.503128	0.511993	0.519258	0.506293	0.620996	0.659883	0.753898	0.81111	0.865382	0.941633	0.996228	1.10534	1.06332	1.09327	1.05431	1.07619	1.03411	1.01565
[truncated: 25 more columns]

## Sheet: Palbociclib_G1 (CDK2)
Time since mitogen stimulation (hr)
0.2	0.4	0.6	0.8	1	1.2	1.4	1.6	1.8	2	2.2	2.4	2.6	2.8	3	3.2	3.4	3.6	3.8	4	4.2	4.4	4.6	4.8	5	5.2	5.4	5.6	5.8	6	6.2	6.4	6.6	6.8	7	7.2	7.4	7.6	7.8	8	8.2	8.4	8.6	8.8	9	9.2	9.4	9.6	9.8	10
																							0.565447	0.601313	0.607676	0.623107	0.620771	0.712897	0.486809	0.491653	0.503067	0.528116	0.51567	0.543189	0.565928	0.578953	0.596205	0.582599	0.620809	0.650622	0.626214	0.589499	0.606844	0.617275	0.668771	0.691407	0.710347	0.721799	0.723438
0.461637	0.479949	0.434631	0.443863	0.446053	0.469077	0.480652	0.441376	0.454128	0.455099	0.464368	0.449929	0.437539	0.436908	0.432258	0.42942	0.42225	0.423009	0.421677	0.405495	0.397956	0.403137	0.389086	0.425122	0.415001	0.411622	0.391529	0.390032	0.366723	0.345815	0.341573	0.333585	0.308919	0.310111	0.310028	0.310762	0.304333	0.283746	0.29259	0.274689	0.26829	0.317565	0.377402	0.441802	0.534976	0.562639	0.630858	0.659187	0.771047	0.774971
0.526892	0.463529	0.480186	0.469708	0.500777	0.495878	0.477249	0.482611	0.472285	0.467724	0.473292	0.444725	0.476279	0.471039	0.489909	0.471342	0.466929	0.469142	0.440145	0.483701	0.423445	0.459768	0.466074	0.475632	0.442378	0.407921	0.360305	0.378401	0.334143	0.346503	0.307632	0.322649	0.310233	0.331379	0.290626	0.304881	0.293625	0.262764	0.290826	0.302389	0.30304	0.326709	0.326412	0.353523	0.329286	0.348063	0.38454	0.372349	0.383643	0.391656
0.588886	0.524004	0.544293	0.551808	0.640486	0.625818	0.608706	0.567424	0.535715	0.518754	0.466715	0.463301	0.459524	0.47401	0.477738	0.484463	0.438309	0.449654	0.421631	0.433826	0.445091	0.469639	0.463633	0.451672	0.458394	0.434544	0.463352	0.46225	0.455439	0.455311	0.456271	0.451943	0.455112	0.450132	0.478902	0.481373	0.486002	0.506622	0.550758	0.560964	0.527308	0.512224	0.511707	0.522604	0.519491	0.518206	0.530928	0.548814	0.577618	0.616518
0.511246	0.524003	0.49355	0.507628	0.507132	0.494612	0.489461	0.491063	0.476824	0.47979	0.463691	0.483389	0.524313	0.502454	0.508242	0.500863	0.514536	0.514553	0.487419	0.486541	0.461965	0.451773	0.452914	0.449948	0.448987	0.442338	0.450947	0.436307	0.458271	0.442672	0.437004	0.425686	0.452554	0.445389	0.483289	0.483473	0.543905	0.541917	0.574204	0.6079	0.588551	0.567321	0.532278	0.512783	0.518788	0.52746	0.498013	0.510045	0.522075	0.557043
0.415627	0.3908	0.367498	0.3414	0.341661	0.322554	0.345717	0.351842	0.348328	0.353099	0.36808	0.348015	0.356867	0.351183	0.335184	0.312474	0.306341	0.303816	0.278942	0.277664	0.276768	0.275882	0.284436	0.267814	0.257442	0.254897	0.246502	0.245852	0.264551	0.262152	0.258451	0.274275	0.276626	0.265538	0.261795	0.257908	0.290914	0.300151	0.333464	0.356157	0.392709	0.43458	0.501432	0.550359	0.70376	0.659467	0.723522	0.680227	0.715774	0.725345
0.56218	0.582575	0.629658	0.641629	0.690707	0.632974	0.591336	0.547368	0.54807	0.449247	0.472359	0.446444	0.424946	0.416618	0.417132	0.45936	0.45669	0.458671	0.460638	0.447807	0.430738	0.418287	0.438003	0.42919	0.462179	0.442441	0.441414	0.450238	0.47482	0.475989	0.48169	0.467504	0.495746	0.485839	0.487362	0.460508	0.458636	0.463762	0.459403	0.480188	0.46017	0.469811	0.520464	0.549297	0.539351	0.530803	0.568422	0.562	0.569223	0.566089
0.530702	0.472639	0.455502	0.466155	0.505414	0.472717	0.467408	0.452283	0.434403	0.412096	0.386123	0.374386	0.363916	0.354783	0.36854	0.370459	0.385167	0.398049	0.37894	0.391891	0.379154	0.39756	0.385766	0.370258	0.375428	0.383159	0.376809	0.384966	0.364472	0.356524	0.3849	0.391584	0.402115	0.416798	0.402474	0.401389	0.389189	0.384702	0.387832	0.385629	0.389337	0.353564	0.354028	0.34651	0.345957	0.341472	0.350255	0.41242	0.490224	0.563639
							0.627826	0.563522	0.538042	0.544196	0.522671	0.535074	0.55095	0.51754	0.494839	0.497298	0.519196	0.513139	0.510282	0.501741	0.493606	0.491619	0.48739	0.511051	0.50441	0.509744	0.481435	0.485308	0.473742	0.479284	0.473818	0.461622	0.469006	0.4689	0.456231	0.464933	0.485613	0.499641	0.506951	0.520247	0.533108	0.546467	0.567387	0.568514	0.557399	0.578333	0.627605	0.653176	0.725544
											0.555687	0.559719	0.526684	0.529812	0.517287	0.521997	0.504356	0.504246	0.494879	0.497126	0.494687	0.484223	0.488512	0.476304	0.477416	0.455955	0.446063	0.440193	0.422444	0.444716	0.450297	0.424458	0.412627	0.413451	0.416918	0.389717	0.369712	0.37871	0.393057	0.381287	0.385483	0.375932	0.378396	0.411742	0.416748	0.42606	0.410701	0.416295	0.44323
																				0.389002	0.34885	0.327771	0.346974	0.328594	0.336544	0.326744	0.331689	0.349363	0.37938	0.383687	0.375979	0.380625	0.381513	0.400527	0.401834	0.409888	0.421764	0.41686	0.416338	0.389128	0.378008	0.405649	0.453798	0.468349	0.505953	0.537471	0.651531	0.698185	0.759138
0.505663	0.564395	0.613326	0.63602	0.64999	0.627907	0.570709	0.500723	0.49138	0.465351	0.4572	0.428349	0.434271	0.410472	0.393582	0.399413	0.416094	0.395572	0.425959	0.394842	0.37783	0.398035	0.390248	0.380188	0.401515	0.394807	0.394389	0.404734	0.393422	0.404469	0.419603	0.41783	0.406394	0.387553	0.377216	0.379235	0.407965	0.386264	0.416413	0.428081	0.456107	0.495395	0.536235	0.588573	0.651473	0.675005	0.668561	0.689332	0.685034	0.670357
0.513932	0.521563	0.516144	0.515978	0.486638	0.526992	0.536563	0.528653	0.532846	0.51657	0.515912	0.496387	0.519086	0.499789	0.488109	0.476555	0.513361	0.49381	0.483153	0.483323	0.45725	0.447589	0.468119	0.465734	0.487379	0.478061	0.456266	0.456549	0.4714	0.431633	0.433132	0.434174	0.432432	0.422033	0.430706	0.423513	0.436997	0.433614	0.432345	0.406262	0.408168	0.43728	0.423655	0.416721	0.446435	0.510616	0.563321	0.645923	0.704212	0.745929
0.491933	0.509766	0.518192	0.511557	0.538104	0.541311	0.534876	0.526886	0.508618	0.499642	0.492518	0.471274	0.437787	0.416481	0.412287	0.408194	0.429129	0.39248	0.385126	0.393994	0.39936	0.395964	0.376391	0.371661	0.377094	0.366523	0.363897	0.357912	0.366211	0.355149	0.343559	0.347077	0.341177	0.339522	0.347069	0.344874	0.34728	0.340529	0.332621	0.336933	0.326448	0.341921	0.352737	0.352724	0.347983	0.377827	0.39271	0.410397	0.42512	0.438754
0.569809	0.63063	0.628805	0.609706	0.541957	0.55003	0.566507	0.539209	0.512934	0.519888	0.488889	0.499016	0.485991	0.490613	0.466274	0.454756	0.445944	0.458718	0.448233	0.469563	0.467918	0.489823	0.470148	0.459281	0.459079	0.466911	0.439256	0.442399	0.443825	0.436268	0.441343	0.451354	0.431326	0.439938	0.459669	0.466103	0.473478	0.475153	0.465425	0.479144	0.482389	0.531522	0.597758	0.63537	0.741066	0.790585	0.854183	0.905321	0.921897	0.977156
																				0.47185	0.473954	0.467444	0.48713	0.47597	0.470849	0.462111	0.457833	0.459157	0.440832	0.414032	0.423782	0.427891	0.41707	0.443895	0.452836	0.460746	0.449075	0.450823	0.434941	0.428977	0.42059	0.420316	0.442374	0.486443	0.533732	0.596139	0.642629	0.687725	0.719571
0.592952	0.609423	0.567233	0.55348	0.489237	0.448687	0.472223	0.448162	0.481839	0.465993	0.475619	0.48343	0.477868	0.457042	0.457471	0.458132	0.455802	0.450157	0.464867	0.457934	0.439664	0.428239	0.411621	0.391228	0.380722	0.367353	0.360846	0.348198	0.335794	0.325155	0.326742	0.324136	0.309516	0.303635	0.31774	0.309032	0.293607	0.290217	0.302571	0.308657	0.32723	0.344269	0.357986	0.377008	0.407012	0.440782	0.488705	0.550662	0.639348	0.714391
0.442788	0.500484	0.509988	0.468157	0.47606	0.429706	0.413111	0.390888	0.392245	0.389964	0.436251	0.436038	0.420712	0.416371	0.418117	0.412674	0.414419	0.406415	0.433629	0.43298	0.429322	0.400812	0.390739	0.377475	0.36161	0.378969	0.385387	0.384227	0.380149	0.382857	0.380222	0.395	0.437734	0.462673	0.456845	0.463933	0.501636	0.524475	0.557446	0.572383	0.550554	0.516102	0.557802	0.570148	0.567576	0.551543	0.602034	0.636036	0.59625	0.624023
	0.568134	0.571909	0.545372	0.539662	0.547739	0.468971	0.441254	0.438477	0.463571	0.497356	0.481751	0.451155	0.436229	0.430756	0.440634	0.418222	0.403293	0.402434	0.418558	0.410994	0.384659	0.383578	0.385968	0.359249	0.36018	0.358531	0.367511	0.346771	0.3555	0.387196	0.363706	0.360271	0.351386	0.374683	0.374437	0.38026	0.390535	0.390212	0.402973	0.438153	0.459343	0.499121	0.537054	0.572709	0.602156	0.62966	0.674165	0.686753	0.71428
									0.548687	0.53533	0.514777	0.528776	0.519593	0.513452	0.484053	0.497431	0.497777	0.496251	0.506976	0.504958	0.483183	0.451684	0.440299	0.413198	0.417768	0.41742	0.408871	0.426228	0.424196	0.399965	0.370934	0.363991	0.368721	0.35807	0.357228	0.346572	0.353039	0.353475	0.351257	0.361714	0.344765	0.347894	0.358407	0.370894	0.374831	0.381418	0.390564	0.407403	0.444298
0.476584	0.46704	0.47566	0.460696	0.444062	0.462261	0.49291	0.524222	0.545123	0.55876	0.541384	0.52957	0.517877	0.522263	0.509623	0.510043	0.501751	0.496145	0.45372	0.440812	0.433742	0.443608	0.41182	0.384778	0.387379	0.373444	0.390463	0.381474	0.373603	0.380343	0.378609	0.397699	0.374327	0.383304	0.387494	0.359087	0.336015	0.337968	0.357878	0.355366	0.354991	0.37541	0.421984	0.45016	0.517303	0.586909	0.660752	0.711696	0.815351	0.84808
0.568624	0.598579	0.640863	0.606195	0.634798	0.617975	0.595508	0.548748	0.483554	0.484974	0.454485	0.436863	0.46371	0.461217	0.464487	0.464475	0.486163	0.46937	0.447462	0.448835	0.473653	0.462939	0.469522	0.463753	0.448281	0.452464	0.439573	0.443229	0.423478	0.434905	0.42627	0.430015	0.433507	0.432523	0.430404	0.413282	0.431139	0.445748	0.461263	0.464132	0.438158	0.449504	0.44054	0.412123	0.424344	0.441436	0.433532	0.426542	0.417776	0.439018
0.551082	0.534123	0.516151	0.508763	0.524036	0.521498	0.518651	0.542821	0.539731	0.514684	0.520776	0.502921	0.4976	0.4891	0.478873	0.469684	0.449823	0.433418	0.405297	0.414085	0.396222	0.384594	0.373934	0.371138	0.369547	0.366408	0.361691	0.370393	0.368407	0.347633	0.335791	0.35957	0.355787	0.366827	0.374973	0.373707	0.370542	0.353823	0.373828	0.35621	0.353409	0.360996	0.36406	0.349997	0.388676	0.399048	0.434387	0.478525	0.523649	0.579163
0.597965	0.636321	0.645995	0.650109	0.627711	0.628847	0.618744	0.648318	0.628707	0.612775	0.593335	0.565746	0.546554	0.50554	0.490123	0.490668	0.494525	0.457641	0.478207	0.490029	0.463409	0.474559	0.482799	0.466731	0.475631	0.482557	0.468434	0.501913	0.491095	0.516799	0.509548	0.478665	0.481865	0.497305	0.511768	0.505809	0.502572	0.488957	0.477156	0.474256	0.468758	0.478946	0.478454	0.484785	0.520761	0.504631	0.552355	0.634232	0.662041	0.748714
0.5701	0.560207	0.558568	0.564605	0.571704	0.57643	0.576497	0.568662	0.574862	0.550372	0.591752	0.578479	0.5536	0.564886	0.528435	0.534344	0.521133	0.504648	0.482061	0.46819	0.444215	0.433531	0.428164	0.422038	0.409038	0.406504	0.394388	0.39954	0.371085	0.366278	0.357398	0.34756	0.351421	0.341133	0.337933	0.340882	0.338429	0.327598	0.342588	0.36851	0.384672	0.407071	0.417985	0.41392	0.426063	0.426864	0.443323	0.478545	0.500529	0.538495
0.594442	0.619611	0.609745	0.575529	0.568896	0.564014	0.58281	0.570165	0.542183	0.543227	0.548021	0.54908	0.568529	0.528396	0.534525	0.52074	0.492947	0.482248	0.465843	0.461878	0.435107	0.421842	0.409324	0.402063	0.407118	0.374627	0.388574	0.421389	0.432688	0.437683	0.436781	0.445167	0.445934	0.437215	0.448934	0.452577	0.466583	0.451716	0.447471	0.444665	0.449673	0.444959	0.449564	0.448844	0.436124	0.432068	0.43282	0.453642	0.494844	0.506365
0.568554	0.570458	0.572874	0.560236	0.55119	0.546789	0.54856	0.537767	0.518815	0.498044	0.487198	0.489645	0.481889	0.463533	0.460497	0.447751	0.420446	0.434105	0.44961	0.447755	0.457907	0.461369	0.447595	0.454423	0.453805	0.441598	0.447261	0.438025	0.435551	0.431223	0.421957	0.410936	0.413969	0.409006	0.410926	0.401708	0.396541	0.386323	0.384102	0.383637	0.367951	0.382759	0.391804	0.392156	0.414832	0.427926	0.459244	0.487202	0.521854	0.555099
0.574248	0.54233	0.499585	0.50132	0.519266	0.476533	0.486423	0.470608	0.479549	0.438908	0.430548	0.397052	0.394337	0.369259	0.345476	0.316027	0.323509	0.314144	0.33488	0.30144	0.314242	0.319043	0.350511	0.337421	0.351215	0.341493	0.34935	0.3627	0.363991	0.384252	0.395828	0.373788	0.383422	0.34804	0.331503	0.315939	0.301828	0.318379	0.304689	0.299227	0.307409	0.33065	0.356551	0.4503	0.550148	0.618996	0.743304	0.79381	0.843177	0.92623
0.547783	0.495108	0.540771	0.545089	0.608678	0.661	0.631985	0.576221	0.620372	0.581073	0.566812	0.564693	0.549286	0.571069	0.571406	0.565047	0.579582	0.546734	0.539911	0.519574	0.472795	0.470048	0.4634	0.471344	0.473589	0.448094	0.436831	0.426985	0.398694	0.389302	0.37927	0.372505	0.378717	0.36295	0.357951	0.357421	0.358417	0.348974	0.351247	0.351286	0.343012	0.369393	0.38381	0.396445	0.430686	0.45642	0.485842	0.535745	0.56984	0.597763
0.541027	0.564534	0.541329	0.527243	0.500928	0.51858	0.537287	0.526497	0.519665	0.512478	0.50855	0.490318	0.485888	0.47324	0.450294	0.445804	0.454719	0.446013	0.434586	0.438093	0.434528	0.433238	0.411392	0.417184	0.410095	0.408925	0.425105	0.407765	0.385719	0.386951	0.378734	0.368914	0.379354	0.386939	0.391886	0.388215	0.401592	0.405271	0.445237	0.459629	0.465177	0.475576	0.495763	0.497178	0.524818	0.574031	0.641483	0.702199	0.74524	0.735218
	0.643802	0.61962	0.62812	0.648503	0.68214	0.627079	0.590285	0.575456	0.56195	0.52774	0.51965	0.505338	0.508794	0.489164	0.503429	0.499769	0.472773	0.472658	0.510496	0.519441	0.509715	0.479256	0.482437	0.45292	0.450903	0.45515	0.463634	0.448827	0.433583	0.429874	0.442736	0.466416	0.456789	0.462088	0.473667	0.489283	0.475929	0.483958	0.491711	0.479436	0.512902	0.535518	0.521656	0.524192	0.565702	0.594851	0.63785	0.629688	0.644007
				0.516096	0.463981	0.450993	0.440952	0.441036	0.454705	0.451375	0.466486	0.466888	0.485029	0.483079	0.461343	0.487279	0.492541	0.469607	0.476921	0.474361	0.450118	0.454407	0.46881	0.469383	0.456483	0.460696	0.455787	0.451934	0.449923	0.42325	0.426661	0.457594	0.432863	0.431271	0.430136	0.434517	0.431499	0.434678	0.437758	0.484039	0.509441	0.566233	0.604603	0.618943	0.618867	0.642439	0.681063	0.694194	0.729933
								0.434735	0.433433	0.419164	0.429192	0.428284	0.453385	0.443158	0.414298	0.419809	0.404571	0.408365	0.419335	0.42369	0.428879	0.443101	0.449425	0.445857	0.442006	0.442761	0.435671	0.432901	0.415834	0.428351	0.444422	0.421248	0.411012	0.400847	0.384134	0.366892	0.350921	0.350228	0.336437	0.324616	0.326999	0.304116	0.322503	0.374277	0.436711	0.46851	0.5186	0.557078	0.629102
										0.382521	0.410483	0.420285	0.421837	0.410794	0.395794	0.38072	0.391051	0.377628	0.359773	0.389588	0.382377	0.341619	0.361813	0.374438	0.359028	0.358532	0.33465	0.326153	0.294383	0.318202	0.328588	0.318478	0.338925	0.348442	0.373811	0.371433	0.391552	0.404877	0.430697	0.458023	0.485809	0.494581	0.506202	0.547009	0.56863	0.585305	0.584387	0.596775	0.601898
																					0.40579	0.403866	0.367122	0.368655	0.342216	0.334209	0.33967	0.350334	0.33763	0.33169	0.317939	0.328288	0.327232	0.325552	0.318413	0.313876	0.31721	0.313219	0.31552	0.313237	0.314812	0.322082	0.322123	0.330445	0.340456	0.355218	0.384451	0.442198	0.485901
0.56212	0.560307	0.545508	0.571303	0.576797	0.58684	0.557893	0.514772	0.519638	0.534805	0.488374	0.481018	0.499528	0.466619	0.445987	0.409501	0.415389	0.398846	0.393789	0.412034	0.414347	0.397704	0.398743	0.405043	0.377466	0.382074	0.374683	0.379108	0.368089	0.364048	0.374394	0.366652	0.378013	0.364241	0.373623	0.373838	0.37797	0.368351	0.401835	0.434551	0.472763	0.508234	0.508158	0.543103	0.556777	0.605065	0.61294	0.652761	0.645239	0.667692
0.386149	0.40715	0.423523	0.410321	0.391016	0.405034	0.388509	0.37467	0.375623	0.35488	0.33662	0.331723	0.320232	0.312439	0.310404	0.314286	0.335874	0.341272	0.352036	0.341098	0.331015	0.323778	0.347112	0.354313	0.328837	0.329848	0.341108	0.346502	0.347283	0.340414	0.327049	0.338577	0.330644	0.337181	0.340683	0.375312	0.403922	0.413641	0.447447	0.469639	0.484103	0.547527	0.581519	0.629502	0.654494	0.688067	0.69087	0.739239	0.720968	0.718399
0.506014	0.481435	0.472338	0.424761	0.393023	0.399121	0.417163	0.365926	0.365823	0.349359	0.362452	0.327449	0.31874	0.311598	0.323804	0.314415	0.304523	0.328426	0.325986	0.313274	0.311945	0.328392	0.333002	0.338453	0.356038	0.377781	0.367558	0.342934	0.339455	0.322254	0.328837	0.34068	0.360066	0.366225	0.366999	0.348537	0.356161	0.367794	0.352415	0.33784	0.349672	0.346995	0.350857	0.346034	0.354592	0.376281	0.384123	0.39402	0.450015	0.488441
0.535389	0.482195	0.481526	0.459017	0.500247	0.475346	0.504597	0.478711	0.478428	0.488827	0.475198	0.475801	0.471283	0.483551	0.449168	0.442774	0.460475	0.473288	0.481215	0.477358	0.472163	0.457862	0.492004	0.492647	0.473184	0.459352	0.444201	0.435336	0.438652	0.422317	0.421233	0.439332	0.421791	0.42571	0.414117	0.439275	0.415102	0.426569	0.439912	0.45769	0.481913	0.526733	0.565413	0.606746	0.669556	0.73003	0.762651	0.77761	0.801206	0.847075
0.522596	0.542137	0.548731	0.570716	0.551457	0.51432	0.48441	0.4761	0.451383	0.436414	0.399233	0.391323	0.378769	0.380523	0.391446	0.397503	0.402027	0.396565	0.402635	0.382391	0.370713	0.397986	0.362678	0.379743	0.375492	0.40164	0.388366	0.406997	0.42179	0.419369	0.41364	0.409629	0.403072	0.393018	0.389298	0.384218	0.376165	0.374076	0.390413	0.39568	0.391188	0.397941	0.408852	0.437443	0.501677	0.529339	0.580023	0.580938	0.63824	0.701991
0.510635	0.464158	0.49039	0.521628	0.562784	0.502895	0.461509	0.478213	0.507805	0.506925	0.479674	0.482808	0.463122	0.438965	0.411632	0.424599	0.403286	0.395539	0.407421	0.385882	0.400943	0.392	0.397697	0.417137	0.386274	0.398324	0.377629	0.3903	0.351316	0.354042	0.346974	0.360973	0.368419	0.369428	0.377286	0.379489	0.390652	0.41583	0.429067	0.461295	0.490991	0.505149	0.501958	0.51659	0.527793	0.623053	0.740076	0.769613	0.854864	0.912323
0.524737	0.517234	0.504572	0.506089	0.49131	0.496257	0.501316	0.504872	0.489467	0.483219	0.49849	0.49256	0.491332	0.477959	0.483073	0.467385	0.45561	0.462449	0.451042	0.442034	0.442226	0.436846	0.41331	0.412009	0.43304	0.415682	0.435117	0.414758	0.411921	0.41346	0.425392	0.4192	0.42726	0.422158	0.420653	0.434123	0.42089	0.414087	0.416622	0.418623	0.409932	0.405486	0.402727	0.400654	0.427718	0.453931	0.484679	0.520011	0.556163	0.59572
0.523723	0.53913	0.614997	0.684069	0.650266	0.649058	0.606099	0.576287	0.51382	0.487399	0.485238	0.500245	0.513007	0.464825	0.458839	0.452902	0.44823	0.445924	0.441172	0.445101	0.441866	0.435785	0.442242	0.430957	0.441263	0.454782	0.431803	0.449932	0.43923	0.440164	0.416418	0.415861	0.401555	0.410248	0.412278	0.418368	0.408217	0.409311	0.401906	0.419642	0.421882	0.414743	0.423169	0.419275	0.416618	0.434968	0.441639	0.450932	0.460334	0.481277
0.436577	0.418503	0.444228	0.47207	0.494951	0.541561	0.555464	0.495574	0.502815	0.493441	0.452043	0.446995	0.442195	0.439534	0.408336	0.401705	0.39131	0.390713	0.379133	0.395713	0.401798	0.405082	0.396668	0.379503	0.373268	0.386688	0.364927	0.394756	0.398879	0.40343	0.404486	0.400431	0.397739	0.386476	0.39827	0.365191	0.357519	0.358108	0.346379	0.349589	0.37869	0.403747	0.445946	0.473339	0.537849	0.605537	0.643511	0.735127	0.7481	0.823706
0.464456	0.442285	0.464078	0.482394	0.458281	0.485548	0.473285	0.502113	0.485877	0.469772	0.442835	0.449205	0.45487	0.438498	0.428949	0.435918	0.428511	0.443228	0.428881	0.416135	0.430419	0.408674	0.391382	0.389932	0.390681	0.397127	0.400862	0.37734	0.380193	0.36874	0.371596	0.36229	0.362978	0.365726	0.325926	0.340743	0.341214	0.310055	0.297759	0.3063	0.328993	0.305837	0.303336	0.350074	0.389846	0.482376	0.569586	0.667715	0.696682	0.813797
		0.511415	0.470783	0.480218	0.493857	0.451038	0.427231	0.409018	0.403464	0.416331	0.400995	0.387678	0.409293	0.384732	0.411996	0.386733	0.383104	0.372138	0.360148	0.34235	0.378309	0.382503	0.356856	0.369925	0.370086	0.376772	0.379885	0.405725	0.397661	0.395297	0.36454	0.399866	0.366574	0.34537	0.345482	0.325337	0.310312	0.330121	0.337724	0.372813	0.380899	0.39879	0.431202	0.467089	0.475437	0.522047	0.5541	0.571224	0.669298
															0.467733	0.436928	0.421251	0.449149	0.42923	0.436717	0.41822	0.413961	0.399083	0.390268	0.383974	0.384054	0.37898	0.365556	0.362581	0.385777	0.398268	0.398391	0.44093	0.433825	0.452584	0.418867	0.41	0.420243	0.407192	0.424107	0.452936	0.439144	0.438571	0.475628	0.476578	0.506218	0.516484	0.516631	0.523836
0.544097	0.492407	0.477501	0.474991	0.479693	0.51817	0.538245	0.536165	0.506195	0.497355	0.494629	0.472291	0.52065	0.471354	0.508643	0.510236	0.535811	0.529724	0.499013	0.545106	0.547853	0.519978	0.512109	0.513474	0.505604	0.521247	0.47361	0.452759	0.45816	0.434028	0.424466	0.421667	0.416257	0.402141	0.404923	0.409933	0.416776	0.426026	0.453014	0.433365	0.419847	0.408797	0.398114	0.390867	0.403258	0.407973	0.40105	0.407658	0.42535	0.419891
																			0.588917	0.537689	0.453245	0.480137	0.460863	0.42563	0.437434	0.401497	0.414748	0.414692	0.415175	0.399628	0.416792	0.43533	0.425366	0.423512	0.42181	0.423756	0.447443	0.433778	0.424322	0.393462	0.398934	0.379882	0.359885	0.391548	0.406045	0.41873	0.44338	0.475966	0.486503
0.586118	0.584175	0.518004	0.549011	0.585804	0.659712	0.649992	0.592157	0.569057	0.530275	0.508654	0.486939	0.491296	0.475402	0.455698	0.476403	0.466993	0.453177	0.469245	0.463076	0.501866	0.482603	0.487659	0.440871	0.422686	0.420949	0.46467	0.445292	0.444089	0.429375	0.41959	0.412406	0.386804	0.376792	0.380166	0.364472	0.360057	0.361287	0.37607	0.390486	0.395508	0.439527	0.47844	0.534524	0.619449	0.696803	0.785959	0.864978	0.894752	0.908812
0.591552	0.62884	0.633331	0.640447	0.58279	0.596989	0.59197	0.601269	0.594446	0.531748	0.529689	0.54126	0.516876	0.506875	0.47302	0.460564	0.42776	0.423313	0.410601	0.389699	0.400765	0.387912	0.403201	0.406637	0.395083	0.4169	0.392456	0.402899	0.396353	0.412874	0.415845	0.412881	0.411151	0.419739	0.411308	0.407953	0.419025	0.435475	0.425211	0.454595	0.463266	0.47607	0.51846	0.53157	0.559938	0.608405	0.663333	0.733857	0.797423	0.841886
0.482335	0.455666	0.431905	0.457288	0.423025	0.42934	0.414914	0.409378	0.407071	0.35375	0.343108	0.337247	0.345536	0.353295	0.341631	0.299149	0.334517	0.312803	0.321341	0.314412	0.345245	0.370566	0.338766	0.331411	0.323461	0.342967	0.344653	0.348449	0.348492	0.335431	0.324366	0.311841	0.337254	0.328232	0.302612	0.331619	0.317229	0.344888	0.346105	0.33832	0.359707	0.382795	0.4025	0.460382	0.511943	0.592098	0.655341	0.72298	0.752429	0.791817
0.589976	0.582461	0.536309	0.513278	0.446476	0.433233	0.386362	0.382647	0.359378	0.304867	0.305232	0.290429	0.284666	0.292946	0.311436	0.294729	0.287563	0.270928	0.27528	0.27185	0.26214	0.25104	0.266326	0.242147	0.247319	0.232488	0.2168	0.20761	0.211868	0.20878	0.195657	0.197018	0.223175	0.232337	0.241836	0.249939	0.27567	0.296353	0.306028	0.321246	0.342801	0.344913	0.364298	0.379989	0.380473	0.38608	0.424899	0.483008	0.537519	0.592357
0.446375	0.518877	0.497394	0.541523	0.56779	0.567541	0.558243	0.518311	0.473152	0.409062	0.432352	0.406007	0.416196	0.397593	0.405192	0.404118	0.396284	0.349372	0.362314	0.343906	0.307857	0.306578	0.328507	0.325375	0.327895	0.34567	0.349001	0.346065	0.356787	0.347512	0.35553	0.359901	0.379063	0.396373	0.425401	0.446829	0.412444	0.421068	0.396403	0.392742	0.422568	0.434609	0.472164	0.516864	0.552017	0.578193	0.625711	0.671204	0.696198	0.694157
										0.516644	0.496763	0.514411	0.494812	0.486549	0.434823	0.403228	0.397872	0.397498	0.414627	0.392504	0.408196	0.40254	0.422892	0.440698	0.433784	0.43248	0.410688	0.401439	0.387693	0.397342	0.383071	0.375568	0.358936	0.3481	0.356059	0.358341	0.359643	0.338407	0.348191	0.363261	0.387664	0.401505	0.428693	0.448939	0.453135	0.517439	0.575718	0.623567	0.675658
0.534576	0.523542	0.509663	0.508435	0.496259	0.497444	0.483281	0.464067	0.441111	0.427529	0.417603	0.393249	0.387373	0.404812	0.400324	0.386163	0.380568	0.379816	0.38888	0.393708	0.393267	0.378106	0.378714	0.383761	0.385381	0.392391	0.396596	0.387895	0.394194	0.38403	0.406838	0.391293	0.408553	0.399578	0.394176	0.37792	0.36515	0.369507	0.361633	0.379865	0.371128	0.364557	0.364524	0.38541	0.399752	0.403709	0.423967	0.435532	0.462643	0.504259
0.584085	0.562316	0.553084	0.566429	0.52611	0.438062	0.443491	0.42882	0.459792	0.445167	0.433149	0.429088	0.41653	0.403048	0.417534	0.433388	0.435862	0.424949	0.41542	0.393938	0.404861	0.396425	0.3981	0.405129	0.403294	0.395366	0.39999	0.391768	0.389372	0.377553	0.38405	0.369809	0.366503	0.364889	0.36409	0.373341	0.37683	0.393333	0.405344	0.392713	0.404828	0.404022	0.396079	0.376783	0.3726	0.358532	0.353239	0.354224	0.361869	0.379288
												0.651283	0.66752	0.583957	0.57657	0.576	0.572582	0.574549	0.536824	0.524588	0.496802	0.477081	0.459216	0.445452	0.437887	0.435063	0.425811	0.428014	0.423211	0.449649	0.459742	0.452919	0.465157	0.4803	0.513784	0.512358	0.510365	0.493403	0.493724	0.504439	0.519089	0.559931	0.566469	0.571797	0.604524	0.623462	0.645832	0.658522	0.681317
0.57928	0.56625	0.551094	0.524202	0.525772	0.585021	0.556554	0.542971	0.510984	0.474978	0.466423	0.439668	0.426753	0.438765	0.428458	0.407469	0.426124	0.444883	0.467854	0.45342	0.4521	0.4462	0.441072	0.401778	0.389526	0.409799	0.402724	0.416075	0.40526	0.399846	0.427088	0.401107	0.391681	0.394024	0.394559	0.357725	0.382225	0.358306	0.348478	0.327312	0.334194	0.327319	0.31081	0.322077	0.355054	0.366208	0.382707	0.423406	0.474627	0.516401
0.586793	0.540836	0.547366	0.528956	0.503091	0.517501	0.503255	0.599363	0.570108	0.569565	0.536205	0.522229	0.515045	0.499656	0.490392	0.462159	0.509395	0.443193	0.459317	0.440192	0.435199	0.420706	0.395666	0.411474	0.4064	0.39425	0.400804	0.400169	0.416404	0.416406	0.41944	0.421298	0.412618	0.423675	0.400636	0.405999	0.416746	0.390193	0.378895	0.360553	0.362586	0.37653	0.405445	0.413384	0.437306	0.436948	0.437448	0.454823	0.478369	0.484653
0.592995	0.616963	0.553337	0.598768	0.590021	0.581467	0.569736	0.531114	0.472111	0.467306	0.443592	0.456239	0.453561	0.42006	0.422699	0.4095	0.406301	0.423529	0.419349	0.404239	0.429436	0.41381	0.398068	0.372767	0.370107	0.37873	0.38695	0.37824	0.376774	0.355972	0.338609	0.344684	0.341268	0.354724	0.345714	0.336397	0.325701	0.31674	0.315806	0.325813	0.328608	0.34299	0.328078	0.341864	0.333889	0.351138	0.368458	0.358494	0.364554	0.359625
0.572065	0.598921	0.593115	0.589629	0.584248	0.595324	0.583476	0.560407	0.522967	0.517903	0.506761	0.484123	0.489386	0.512201	0.499956	0.502647	0.498038	0.500064	0.49913	0.509988	0.509327	0.518174	0.48993	0.474934	0.472849	0.462922	0.466034	0.475395	0.48573	0.468705	0.46679	0.478695	0.458574	0.449598	0.442345	0.459094	0.469867	0.445192	0.460531	0.445975	0.463632	0.474006	0.467769	0.477097	0.476476	0.473087	0.472628	0.478964	0.461492	0.517284
0.467842	0.507898	0.466618	0.524393	0.497973	0.478702	0.447189	0.426874	0.417174	0.433515	0.445407	0.419616	0.428081	0.411201	0.436535	0.43189	0.425748	0.420561	0.40413	0.395541	0.382799	0.384572	0.37312	0.36604	0.355448	0.34559	0.343358	0.342694	0.342036	0.326603	0.318771	0.325764	0.33232	0.33137	0.336115	0.32436	0.33105	0.338421	0.342364	0.351896	0.339298	0.342204	0.360748	0.356144	0.370065	0.385836	0.397356	0.429729	0.45769	0.500795
0.54338	0.53852	0.55033	0.567021	0.586502	0.578622	0.534188	0.536292	0.514846	0.532621	0.526156	0.564945	0.502317	0.486001	0.465131	0.486215	0.492394	0.502778	0.466709	0.454199	0.449968	0.457965	0.484371	0.462025	0.450753	0.444001	0.421677	0.394038	0.3757	0.381647	0.378081	0.402321	0.406153	0.409685	0.406344	0.397812	0.396081	0.377791	0.368881	0.356801	0.348864	0.368863	0.367067	0.379704	0.378534	0.376155	0.411362	0.420494	0.469776	0.532653
0.596987	0.628092	0.580901	0.601816	0.569183	0.567941	0.572457	0.538068	0.510665	0.491251	0.508933	0.487552	0.448949	0.443875	0.429831	0.410912	0.399584	0.381312	0.382507	0.366225	0.366052	0.359636	0.3371	0.324477	0.294262	0.28203	0.279743	0.281797	0.288335	0.275818	0.262858	0.26683	0.274442	0.287253	0.277607	0.273298	0.253514	0.247002	0.253183	0.240203	0.261599	0.290807	0.337371	0.361922	0.436143	0.439795	0.479769	0.536408	0.640804	0.686548
0.509988	0.508099	0.481752	0.489315	0.493227	0.485611	0.493567	0.462767	0.481967	0.476945	0.46216	0.454372	0.478689	0.459867	0.478414	0.464894	0.463217	0.469102	0.49056	0.467255	0.438198	0.442327	0.461888	0.439649	0.450004	0.42173	0.420835	0.415933	0.408522	0.429001	0.464473	0.447813	0.44329	0.455006	0.453471	0.452471	0.467711	0.460906	0.48004	0.490874	0.489563	0.500237	0.518173	0.550808	0.615443	0.644427	0.75707	0.781433	0.884282	0.879552
0.519832	0.573685	0.570942	0.609935	0.594872	0.5721	0.57068	0.53377	0.546392	0.538886	0.50578	0.511711	0.474164	0.46616	0.465375	0.454549	0.478189	0.456636	0.449543	0.444545	0.447173	0.447767	0.450912	0.426138	0.456968	0.445119	0.450368	0.445119	0.425856	0.42329	0.391951	0.379359	0.369117	0.377359	0.371609	0.366137	0.368234	0.350918	0.356748	0.340482	0.341862	0.332578	0.350726	0.34764	0.372261	0.408841	0.467532	0.541299	0.635311	0.70249
		0.574833	0.588316	0.584134	0.589546	0.588556	0.531734	0.535758	0.536867	0.512786	0.497478	0.496962	0.487688	0.475604	0.469445	0.45985	0.440582	0.45025	0.433125	0.430338	0.436307	0.429724	0.429442	0.422519	0.40689	0.427107	0.40672	0.397591	0.411245	0.394708	0.405496	0.392435	0.393577	0.407243	0.408951	0.406972	0.405804	0.399757	0.395492	0.427331	0.449152	0.468152	0.495631	0.490476	0.515268	0.53483	0.572593	0.614845	0.658501
0.482942	0.426472	0.425753	0.461827	0.475647	0.476527	0.453184	0.45826	0.423762	0.41361	0.387109	0.398654	0.371241	0.370462	0.344517	0.379784	0.4151	0.407203	0.381654	0.390588	0.381444	0.39758	0.385408	0.392059	0.388563	0.381523	0.369894	0.362474	0.357412	0.377075	0.375843	0.367906	0.38002	0.366952	0.324324	0.331027	0.342168	0.347015	0.352793	0.343618	0.362692	0.41413	0.45227	0.476613	0.514613	0.530241	0.610752	0.662084	0.697008	0.705943
0.556966	0.570806	0.607683	0.592161	0.63501	0.656232	0.683586	0.679376	0.695704	0.632125	0.607441	0.600264	0.603859	0.582443	0.548846	0.579674	0.592917	0.582435	0.573813	0.564287	0.512451	0.500731	0.466322	0.477632	0.444585	0.42332	0.426872	0.431834	0.46481	0.455619	0.487896	0.457237	0.446848	0.431162	0.449723	0.457075	0.450777	0.431479	0.447719	0.440145	0.449222	0.445938	0.473193	0.509556	0.546057	0.656984	0.716583	0.799422	0.834803	0.884641
0.486418	0.549722	0.51811	0.509417	0.526506	0.520097	0.490253	0.477195	0.459934	0.47862	0.474085	0.503444	0.500156	0.480943	0.450484	0.471054	0.460065	0.453432	0.447811	0.449551	0.425613	0.420995	0.389932	0.389956	0.377133	0.389606	0.360744	0.352735	0.366515	0.379678	0.385089	0.386139	0.389353	0.392069	0.379292	0.387142	0.422191	0.445546	0.452794	0.444055	0.464254	0.488921	0.523926	0.574052	0.673775	0.729229	0.803521	0.832885	0.853745	0.874708
																			0.610217	0.651809	0.652193	0.612295	0.586827	0.544182	0.545332	0.539634	0.506392	0.513671	0.503489	0.526688	0.493371	0.487163	0.44367	0.459909	0.468858	0.511136	0.504916	0.470386	0.481416	0.454455	0.400143	0.397752	0.367183	0.445188	0.455199	0.460529	0.498688	0.553211	0.628147
0.558026	0.5631	0.547666	0.581072	0.577211	0.562654	0.508209	0.520626	0.486114	0.533317	0.476434	0.453528	0.462223	0.474278	0.479524	0.487658	0.467931	0.453034	0.455088	0.465209	0.453934	0.471086	0.478512	0.486168	0.47328	0.489069	0.452646	0.479562	0.471615	0.476667	0.457903	0.446593	0.448065	0.441853	0.453388	0.438813	0.419188	0.406056	0.401282	0.399372	0.391572	0.405068	0.40138	0.410165	0.412731	0.438479	0.473659	0.512997	0.539928	0.587053
0.573503	0.571637	0.611466	0.580905	0.568558	0.556401	0.541065	0.544197	0.535425	0.510549	0.517191	0.509562	0.492831	0.497916	0.489424	0.478737	0.492735	0.463616	0.470512	0.458048	0.448667	0.439819	0.420003	0.404669	0.40143	0.397176	0.405134	0.379002	0.384765	0.391887	0.39384	0.390155	0.382237	0.383814	0.378105	0.382957	0.382722	0.378427	0.378791	0.357794	0.391081	0.410818	0.442754	0.465463	0.494259	0.515063	0.573564	0.597808	0.635581	0.649072
	0.695095	0.718498	0.685332	0.710971	0.672229	0.651268	0.61245	0.602787	0.584477	0.583823	0.529283	0.504809	0.48674	0.47861	0.503879	0.493774	0.486167	0.492001	0.516719	0.505496	0.50178	0.504705	0.502969	0.49893	0.495416	0.482295	0.493017	0.474918	0.447573	0.451872	0.434944	0.441428	0.444709	0.44222	0.441274	0.44314	0.455863	0.457652	0.468004	0.47662	0.486266	0.498821	0.477429	0.486324	0.469815	0.487034	0.48754	0.512748	0.515255
						0.659296	0.657746	0.590349	0.577276	0.549609	0.507398	0.539981	0.515233	0.495158	0.465918	0.473257	0.479817	0.444293	0.457819	0.478809	0.48446	0.467493	0.492589	0.457292	0.469451	0.452428	0.44928	0.441443	0.422522	0.431205	0.433507	0.455815	0.462602	0.462917	0.482149	0.511083	0.512327	0.549423	0.565449	0.579549	0.577183	0.611221	0.657122	0.685279	0.733062	0.76697	0.796825	0.843959	0.886354
							0.479169	0.488108	0.459297	0.444211	0.441551	0.382423	0.382514	0.387104	0.381707	0.365116	0.380592	0.395509	0.391425	0.389699	0.398529	0.378824	0.381068	0.37571	0.360529	0.363298	0.350131	0.345361	0.335984	0.344866	0.33221	0.319747	0.334751	0.319014	0.325937	0.311708	0.324092	0.323025	0.334091	0.343435	0.354725	0.377627	0.388602	0.459415	0.453218	0.492958	0.540702	0.60349	0.678526
0.585497	0.5928	0.603581	0.589288	0.570965	0.561775	0.5358	0.487835	0.461048	0.438373	0.416311	0.401315	0.402031	0.396015	0.417412	0.422552	0.414631	0.433438	0.41448	0.405133	0.409443	0.426655	0.409281	0.415888	0.413178	0.4101	0.428418	0.392627	0.404382	0.421888	0.425215	0.420856	0.399164	0.402825	0.381378	0.365984	0.331037	0.339009	0.3795	0.389024	0.393268	0.406126	0.446978	0.511291	0.618567	0.664465	0.686688	0.771149	0.807896	0.81648
0.532378	0.517037	0.501546	0.470903	0.468728	0.475804	0.480407	0.488282	0.498625	0.501797	0.480038	0.470688	0.446236	0.442612	0.441978	0.451853	0.448949	0.435343	0.438409	0.447866	0.447052	0.452086	0.454529	0.459567	0.448897	0.444747	0.427222	0.41875	0.419775	0.426791	0.419666	0.43544	0.432718	0.425586	0.429777	0.416132	0.422635	0.414926	0.423017	0.411399	0.398423	0.382415	0.383297	0.381236	0.382973	0.384709	0.394349	0.425678	0.476273	0.547555
0.576651	0.58517	0.565684	0.537718	0.561779	0.499422	0.529696	0.543273	0.512215	0.488289	0.496601	0.457032	0.481219	0.42145	0.422273	0.409995	0.432755	0.425182	0.428338	0.403669	0.436355	0.430763	0.410335	0.409174	0.409982	0.419846	0.402029	0.384086	0.3799	0.380544	0.397228	0.386575	0.397341	0.394795	0.403659	0.402641	0.410774	0.419889	0.43539	0.440283	0.473558	0.480829	0.513535	0.532775	0.624111	0.651603	0.730356	0.786502	0.764963	0.794674
0.521663	0.547072	0.494045	0.515977	0.469099	0.519358	0.511681	0.507279	0.489834	0.490737	0.423416	0.45814	0.433972	0.386775	0.381365	0.382945	0.37128	0.410647	0.405998	0.393773	0.381071	0.392022	0.392942	0.378609	0.376427	0.360297	0.369258	0.338008	0.342382	0.346853	0.378412	0.387838	0.423136	0.392927	0.413249	0.389672	0.352686	0.349315	0.342542	0.367088	0.363879	0.374886	0.381633	0.417455	0.428464	0.45943	0.486605	0.57699	0.654459	0.718334
0.404704	0.454485	0.447413	0.44908	0.431467	0.404138	0.368097	0.360368	0.358817	0.3709	0.381881	0.391445	0.397323	0.396377	0.401379	0.394522	0.402929	0.398495	0.377876	0.38628	0.408941	0.384477	0.376777	0.363379	0.367811	0.347281	0.335187	0.32819	0.321087	0.314453	0.313149	0.319935	0.3226	0.312546	0.306994	0.354972	0.393655	0.435691	0.444984	0.472248	0.461542	0.440172	0.460736	0.438517	0.434335	0.421852	0.443479	0.481416	0.469462	0.50411
	0.623706	0.566417	0.56088	0.605895	0.602531	0.615306	0.614296	0.598509	0.581878	0.518354	0.578399	0.528821	0.508881	0.492925	0.49349	0.506086	0.489771	0.462439	0.466423	0.472539	0.492997	0.483048	0.482361	0.477321	0.461348	0.443748	0.445232	0.44385	0.449165	0.444233	0.472465	0.456917	0.46211	0.456409	0.434924	0.429786	0.437044	0.443846	0.46277	0.459885	0.470772	0.483894	0.485205	0.506842	0.514438	0.517497	0.520048	0.547553	0.574664
						0.562613	0.517755	0.543021	0.501178	0.496775	0.469323	0.442882	0.441567	0.42169	0.436412	0.472229	0.464186	0.446384	0.436341	0.450174	0.449391	0.464594	0.444231	0.445197	0.443947	0.435445	0.440152	0.432582	0.473642	0.465329	0.455344	0.475258	0.458318	0.464584	0.470032	0.445062	0.431539	0.437573	0.457286	0.503345	0.542907	0.586496	0.591061	0.56545	0.528718	0.524425	0.515473	0.525689	0.549921
0.590018	0.665946	0.640633	0.662904	0.665141	0.652049	0.645893	0.645766	0.645599	0.590583	0.636645	0.614583	0.628115	0.610233	0.608129	0.579735	0.531788	0.522251	0.530368	0.521173	0.49289	0.483507	0.482861	0.482648	0.515242	0.485299	0.493522	0.487066	0.481969	0.472261	0.474997	0.464689	0.468461	0.450057	0.473882	0.445071	0.433616	0.4019	0.407057	0.387597	0.394079	0.413828	0.448466	0.460138	0.456256	0.455634	0.446775	0.455582	0.506908	0.54629
0.476306	0.454052	0.422207	0.374254	0.338288	0.322168	0.295672	0.335354	0.347036	0.343078	0.320263	0.34838	0.34996	0.364934	0.355337	0.369226	0.39408	0.401415	0.384458	0.402423	0.4144	0.422485	0.453131	0.417969	0.375929	0.358504	0.363012	0.343492	0.339946	0.342312	0.328992	0.317961	0.331052	0.308602	0.320783	0.301936	0.287381	0.284696	0.273957	0.298746	0.298444	0.312885	0.35061	0.340718	0.390129	0.432661	0.429139	0.465557	0.470241	0.534469
0.595349	0.609128	0.59445	0.623021	0.638452	0.623069	0.609768	0.630053	0.594108	0.569443	0.552302	0.520449	0.517686	0.509795	0.482695	0.479302	0.479076	0.476856	0.440014	0.438864	0.413871	0.405456	0.412189	0.394387	0.372072	0.36845	0.348415	0.348089	0.329223	0.334972	0.351401	0.343501	0.35229	0.354147	0.34351	0.337899	0.342379	0.338141	0.330417	0.328356	0.322018	0.322176	0.320473	0.333469	0.329366	0.327047	0.328151	0.325271	0.337548	0.368805
0.446539	0.565549	0.580348	0.613689	0.5804	0.627124	0.620106	0.588351	0.518679	0.528155	0.48361	0.489234	0.474058	0.385369	0.351385	0.346797	0.360528	0.383549	0.377879	0.390215	0.368737	0.359899	0.347096	0.361179	0.348473	0.333919	0.328711	0.359045	0.399639	0.379663	0.387979	0.367827	0.372897	0.350692	0.379732	0.381408	0.404151	0.424921	0.453551	0.484352	0.547364	0.573303	0.596245	0.604207	0.617589	0.63648	0.669962	0.671851	0.675434	0.672537
0.522396	0.524388	0.510602	0.514129	0.50401	0.499444	0.51039	0.503925	0.509454	0.495808	0.511203	0.480199	0.503616	0.488486	0.47155	0.509349	0.498757	0.53174	0.529397	0.54268	0.513444	0.505228	0.50352	0.495607	0.486256	0.485395	0.492441	0.452546	0.456143	0.450519	0.434135	0.436013	0.456997	0.427847	0.428356	0.421731	0.453789	0.471987	0.489467	0.507158	0.542315	0.553972	0.583559	0.638016	0.67621	0.721292	0.772621	0.802812	0.817073	0.832063
0.553147	0.61186	0.613523	0.635495	0.64785	0.608085	0.606018	0.602395	0.610286	0.605677	0.582153	0.547613	0.51897	0.482312	0.48982	0.475415	0.475717	0.452621	0.460042	0.457333	0.400425	0.41305	0.396403	0.410181	0.405056	0.421694	0.389502	0.385936	0.386833	0.369019	0.377917	0.382808	0.392348	0.368174	0.359322	0.360366	0.364216	0.375024	0.37754	0.364761	0.379328	0.403122	0.44422	0.481694	0.52001	0.548472	0.60603	0.678763	0.746175	0.823438
0.593052	0.597209	0.627158	0.614818	0.574356	0.547934	0.542373	0.517537	0.504416	0.471857	0.468622	0.469455	0.465402	0.469964	0.463264	0.45415	0.460285	0.467256	0.459027	0.472816	0.482672	0.486389	0.483404	0.469212	0.464779	0.466099	0.462779	0.445001	0.440349	0.43357	0.429838	0.419445	0.414528	0.415129	0.408627	0.417998	0.413872	0.412851	0.422914	0.425879	0.435357	0.426765	0.407054	0.397865	0.416806	0.458182	0.453729	0.456614	0.506741	0.544375
0.478762	0.406463	0.400244	0.420776	0.42227	0.450018	0.45827	0.453521	0.466417	0.4458	0.426657	0.408154	0.408625	0.394588	0.385722	0.396532	0.381773	0.383373	0.384111	0.373322	0.384248	0.380065	0.347373	0.365623	0.368107	0.384045	0.369601	0.359351	0.350021	0.347509	0.335284	0.334118	0.330996	0.343648	0.376495	0.358842	0.354887	0.360901	0.352496	0.364647	0.370914	0.380735	0.404393	0.442497	0.490817	0.513811	0.581243	0.653	0.690814	0.733669
0.514802	0.510237	0.537454	0.553056	0.584156	0.566127	0.558228	0.581717	0.544419	0.516735	0.476345	0.442914	0.42854	0.465277	0.495545	0.458294	0.479974	0.456903	0.442494	0.428859	0.457583	0.49024	0.481913	0.467275	0.465192	0.455738	0.458027	0.430358	0.407845	0.416973	0.418082	0.404164	0.407347	0.39039	0.371931	0.374678	0.376835	0.405523	0.40906	0.432038	0.418985	0.43568	0.44422	0.463878	0.469806	0.475751	0.495969	0.516232	0.497265	0.528779
0.526482	0.537262	0.599933	0.609967	0.573334	0.577689	0.563294	0.50375	0.504527	0.466645	0.444019	0.449107	0.463629	0.470649	0.459405	0.460616	0.450078	0.464076	0.457215	0.459142	0.484755	0.488141	0.492114	0.511779	0.496178	0.476344	0.487407	0.482116	0.487638	0.49064	0.482414	0.477465	0.4594	0.457841	0.453112	0.436122	0.4299	0.437257	0.438388	0.428801	0.425662	0.44083	0.4428	0.445719	0.453676	0.467378	0.52879	0.561156	0.635537	0.700444
0.545029	0.56268	0.584689	0.589482	0.525196	0.49305	0.526177	0.497144	0.466528	0.437259	0.436258	0.41169	0.41903	0.418289	0.41128	0.441737	0.437715	0.430094	0.433621	0.43481	0.41105	0.414572	0.404504	0.416533	0.415065	0.414021	0.404884	0.39822	0.396223	0.406664	0.38424	0.383553	0.386119	0.368523	0.402953	0.422734	0.418881	0.4538	0.480226	0.520881	0.563135	0.575675	0.623306	0.664764	0.678948	0.699352	0.72675	0.781501	0.815922	0.79281
0.59118	0.642018	0.635512	0.625969	0.58511	0.566083	0.514057	0.536515	0.503428	0.535927	0.540114	0.54462	0.528471	0.537483	0.548267	0.539391	0.556888	0.520537	0.52273	0.497199	0.491508	0.477008	0.444393	0.432533	0.415441	0.426696	0.39469	0.395635	0.406399	0.39526	0.392804	0.410969	0.400688	0.417289	0.427092	0.457079	0.449869	0.471097	0.503473	0.516435	0.552979	0.577809	0.630457	0.675187	0.691667	0.71359	0.734884	0.722995	0.722143	0.722045
0.546156	0.566629	0.520793	0.567222	0.565587	0.584606	0.594405	0.563257	0.560014	0.538201	0.546151	0.54194	0.550851	0.536568	0.533723	0.4994	0.461804	0.427121	0.456317	0.46927	0.480059	0.464218	0.438121	0.4294	0.428664	0.425162	0.413504	0.384786	0.383183	0.391324	0.393627	0.413743	0.380059	0.391311	0.375053	0.369823	0.368326	0.37605	0.371866	0.37206	0.359233	0.350622	0.349727	0.337534	0.350509	0.375846	0.403891	0.437078	0.44826	0.494335
0.525965	0.592916	0.598233	0.62173	0.564416	0.539249	0.503731	0.479178	0.455999	0.451964	0.445973	0.430617	0.442544	0.446768	0.437381	0.429998	0.434505	0.435804	0.463844	0.432194	0.418454	0.427713	0.420713	0.405955	0.406248	0.384635	0.378869	0.393798	0.395449	0.373075	0.354787	0.343753	0.342323	0.351228	0.344691	0.371743	0.369701	0.381503	0.390778	0.416225	0.407321	0.411286	0.42621	0.449747	0.476571	0.543906	0.607626	0.665947	0.685872	0.741764
0.547116	0.499783	0.504356	0.541975	0.604317	0.546895	0.507132	0.551636	0.469348	0.479775	0.471601	0.463211	0.482154	0.464019	0.437738	0.451531	0.458982	0.46075	0.468411	0.454732	0.447108	0.48215	0.479533	0.474022	0.457329	0.503297	0.481559	0.48731	0.487265	0.480264	0.458668	0.459726	0.431329	0.407425	0.397117	0.388685	0.394289	0.414437	0.429168	0.485222	0.513531	0.571018	0.583385	0.656165	0.721921	0.774727	0.882255	0.920948	0.980658	0.975032
0.57037	0.601991	0.581022	0.567335	0.568359	0.587008	0.612232	0.603102	0.590978	0.60273	0.598152	0.59419	0.589818	0.557194	0.530663	0.538797	0.554321	0.515103	0.508177	0.516421	0.492182	0.48847	0.473976	0.464246	0.465715	0.477632	0.465793	0.456549	0.455453	0.439014	0.435311	0.443283	0.428623	0.428929	0.409412	0.408393	0.396442	0.386242	0.385056	0.375127	0.361315	0.358758	0.379442	0.381966	0.383279	0.392241	0.407286	0.419831	0.452841	0.488579
0.529786	0.538244	0.531417	0.516739	0.535287	0.565532	0.52977	0.528415	0.535558	0.554143	0.533665	0.525096	0.489475	0.494575	0.477877	0.423545	0.394925	0.39174	0.374951	0.394161	0.36965	0.404003	0.37523	0.387397	0.373155	0.39742	0.389197	0.389468	0.371886	0.386798	0.369708	0.366625	0.358143	0.374659	0.378895	0.364453	0.367782	0.387854	0.360729	0.363587	0.392072	0.400184	0.424889	0.47268	0.561069	0.643287	0.743431	0.774899	0.882033	0.895634
0.497156	0.459293	0.425189	0.430966	0.450741	0.424663	0.421891	0.438421	0.416933	0.421269	0.409544	0.413546	0.403121	0.394416	0.39668	0.383732	0.38559	0.389991	0.381928	0.391342	0.384246	0.401715	0.405034	0.396716	0.417214	0.431431	0.433884	0.435097	0.425609	0.460614	0.434514	0.422967	0.448968	0.423011	0.425712	0.384812	0.39449	0.39084	0.38058	0.384527	0.384511	0.407428	0.394283	0.365081	0.351666	0.313167	0.328563	0.323029	0.320766	0.33645
0.558162	0.551469	0.466201	0.473793	0.492881	0.43813	0.463072	0.445262	0.450374	0.456098	0.475253	0.464069	0.486593	0.48151	0.436484	0.471524	0.451216	0.437661	0.4453	0.441103	0.442229	0.431744	0.397384	0.41036	0.404201	0.396639	0.397166	0.392617	0.382826	0.409047	0.398286	0.390949	0.412125	0.413021	0.413406	0.422041	0.417875	0.442108	0.445254	0.449209	0.467927	0.487363	0.496277	0.510364	0.517705	0.551225	0.585463	0.61813	0.650371	0.694375
0.430075	0.42352	0.409267	0.390329	0.461476	0.450746	0.41752	0.402825	0.391196	0.374375	0.383695	0.415973	0.395339	0.416305	0.425555	0.440459	0.432534	0.425249	0.414703	0.418162	0.410862	0.39969	0.384779	0.389426	0.380756	0.370223	0.352567	0.349002	0.364164	0.350007	0.371346	0.377027	0.376789	0.385101	0.365821	0.37914	0.383238	0.388859	0.370392	0.396175	0.407964	0.412086	0.407191	0.411062	0.426099	0.428982	0.440865	0.470419	0.506907	0.550493
0.555117	0.624214	0.584316	0.5851	0.543181	0.493379	0.501527	0.475538	0.456673	0.461231	0.434262	0.409653	0.411941	0.397243	0.41281	0.405832	0.413925	0.402314	0.401617	0.395104	0.390696	0.394577	0.38598	0.396577	0.394624	0.398573	0.392434	0.392775	0.394836	0.392345	0.37334	0.378648	0.370227	0.369732	0.36087	0.351504	0.356312	0.357845	0.363363	0.376013	0.395459	0.39616	0.423766	0.427482	0.453259	0.460313	0.457696	0.469673	0.497388	0.517334
0.402228	0.445732	0.436786	0.439365	0.441809	0.432693	0.425892	0.437823	0.40887	0.391839	0.374053	0.365455	0.333701	0.342546	0.337816	0.344994	0.374151	0.386429	0.389051	0.38166	0.36565	0.364838	0.3566	0.366398	0.352179	0.358085	0.331744	0.329584	0.337004	0.339491	0.329844	0.331216	0.328853	0.329181	0.3561	0.375208	0.3974	0.46455	0.489062	0.525519	0.540053	0.579269	0.587804	0.630732	0.646064	0.661321	0.651932	0.575529	0.578858	0.60808
0.319819	0.336172	0.361228	0.353592	0.349658	0.342678	0.358317	0.37706	0.376873	0.373912	0.394758	0.371971	0.329796	0.330162	0.352444	0.308621	0.290384	0.308436	0.305812	0.330464	0.332055	0.345933	0.32843	0.343715	0.330462	0.320603	0.327944	0.309241	0.307302	0.305404	0.286937	0.276329	0.262178	0.263606	0.241259	0.248823	0.241091	0.245849	0.240045	0.241899	0.249687	0.260182	0.26103	0.256796	0.268238	0.271745	0.307205	0.356468	0.415628	0.488756
0.59466	0.595605	0.646513	0.660339	0.629609	0.627267	0.588147	0.544089	0.529671	0.48786	0.46061	0.449005	0.43823	0.43868	0.424487	0.422414	0.399446	0.386081	0.401998	0.414851	0.411918	0.395426	0.40729	0.384998	0.408451	0.401762	0.41619	0.417418	0.407525	0.397873	0.392363	0.381119	0.394997	0.394319	0.381475	0.379379	0.379132	0.380156	0.376729	0.38153	0.372243	0.364767	0.367159	0.362912	0.370374	0.389063	0.377157	0.393627	0.416455	0.434971
													0.644036	0.606908	0.659818	0.65218	0.642724	0.624855	0.580742	0.540542	0.551048	0.532969	0.506632	0.511253	0.523569	0.506811	0.478747	0.489598	0.466176	0.442295	0.427819	0.428841	0.416441	0.394527	0.389318	0.37479	0.397671	0.408012	0.40624	0.412745	0.391238	0.401771	0.404769	0.405186	0.410255	0.422168	0.429921	0.428065	0.455308
0.555293	0.537524	0.529078	0.553308	0.588795	0.581138	0.601304	0.549752	0.519833	0.491139	0.475576	0.493329	0.471731	0.469193	0.464911	0.45261	0.468754	0.445889	0.458026	0.471275	0.464477	0.460491	0.445074	0.473174	0.464385	0.457817	0.448861	0.458841	0.449559	0.451373	0.420454	0.413202	0.424313	0.423877	0.424351	0.415129	0.410814	0.422813	0.424346	0.424902	0.421295	0.413141	0.425226	0.413218	0.431618	0.455958	0.465462	0.459459	0.492017	0.52615
0.464916	0.465206	0.527658	0.559665	0.62566	0.617864	0.552894	0.559494	0.533837	0.509931	0.505891	0.49224	0.46765	0.436419	0.417051	0.386574	0.423382	0.434507	0.436885	0.422487	0.429584	0.437936	0.410031	0.37032	0.38088	0.38638	0.335377	0.329184	0.300419	0.318763	0.337113	0.334057	0.307831	0.340627	0.417005	0.45387	0.484965	0.541763	0.528707	0.528513	0.461767	0.415754	0.382072	0.399155	0.353154	0.345481	0.38481	0.43649	0.473796	0.516411
		0.562602	0.505288	0.523088	0.521954	0.485551	0.480214	0.447734	0.454942	0.42512	0.408819	0.4029	0.407764	0.396068	0.423535	0.408232	0.422034	0.398002	0.376204	0.366666	0.386479	0.379362	0.396401	0.361531	0.364342	0.382926	0.367775	0.357961	0.352633	0.365523	0.381317	0.369551	0.365866	0.363615	0.367199	0.375104	0.382596	0.375081	0.358054	0.361617	0.361636	0.363411	0.413583	0.416953	0.47616	0.498901	0.520973	0.577908	0.616479
																				0.567143	0.549855	0.549666	0.568705	0.52009	0.507821	0.488053	0.487371	0.493804	0.507991	0.51507	0.533145	0.531456	0.551379	0.53163	0.551338	0.569857	0.595401	0.591634	0.584578	0.595688	0.631233	0.673774	0.696223	0.743787	0.775983	0.775268	0.791155	0.811354	0.894244
0.563206	0.599399	0.62417	0.612687	0.634594	0.563346	0.573186	0.56172	0.580377	0.57994	0.587854	0.571246	0.573411	0.583322	0.586029	0.548684	0.545536	0.556589	0.558995	0.553352	0.56534	0.590869	0.589196	0.595701	0.559259	0.623686	0.601721	0.5904	0.593214	0.55725	0.562972	0.57373	0.589591	0.571862	0.585396	0.58467	0.615494	0.604485	0.619435	0.61043	0.586013	0.578341	0.585199	0.560031	0.573562	0.601557	0.639874	0.660649	0.703027	0.716416
0.489701	0.471278	0.468593	0.441574	0.42271	0.451754	0.430206	0.396874	0.411853	0.402799	0.401165	0.39356	0.378726	0.384481	0.376346	0.374346	0.378788	0.388266	0.399602	0.379907	0.401946	0.390251	0.369188	0.375758	0.338593	0.343901	0.324811	0.316064	0.353495	0.331277	0.335769	0.353554	0.372031	0.375047	0.368837	0.354392	0.348047	0.345764	0.336216	0.357423	0.346279	0.362763	0.364545	0.358901	0.362135	0.395715	0.412064	0.415002	0.491836	0.54072
	0.637387	0.661267	0.682712	0.684482	0.669791	0.661414	0.621457	0.604571	0.582708	0.584214	0.571605	0.567018	0.550796	0.542067	0.533752	0.522543	0.520586	0.520365	0.517648	0.51576	0.513631	0.500739	0.504238	0.514037	0.493795	0.487296	0.479648	0.492097	0.505281	0.497092	0.507305	0.495559	0.498516	0.513033	0.508684	0.513164	0.521446	0.513858	0.510131	0.491813	0.468823	0.462766	0.472821	0.482475	0.462437	0.482987	0.486306	0.466875	0.473906
					0.688216	0.63876	0.637897	0.665522	0.645657	0.675925	0.622565	0.61069	0.61817	0.594167	0.603473	0.600039	0.572356	0.586119	0.576909	0.579465	0.570045	0.548999	0.551744	0.52768	0.524596	0.475649	0.459325	0.472677	0.447637	0.450262	0.456995	0.44529	0.449968	0.450084	0.448556	0.45362	0.456813	0.453311	0.453113	0.431152	0.432253	0.450964	0.442151	0.460106	0.460365	0.497659	0.534855	0.57501	0.643389
[truncated: 25 more columns]

## Sheet: Palbociclib_G1 (CDK4)
Time since mitogen stimulation (hr)
0.2	0.4	0.6	0.8	1	1.2	1.4	1.6	1.8	2	2.2	2.4	2.6	2.8	3	3.2	3.4	3.6	3.8	4	4.2	4.4	4.6	4.8	5	5.2	5.4	5.6	5.8	6	6.2	6.4	6.6	6.8	7	7.2	7.4	7.6	7.8	8	8.2	8.4	8.6	8.8	9	9.2	9.4	9.6	9.8	10
																							0.610894	0.669169	0.667824	0.654756	0.73376	0.814961	1.69113	1.63012	1.76863	1.96022	1.72698	1.64836	1.51526	1.50838	1.51237	1.44295	1.44348	1.42917	1.39918	1.14516	1.15652	1.10546	1.05628	1.12744	1.20767	1.27518	1.34148
0.805042	0.823942	0.639505	0.764255	0.680159	0.645988	0.612948	0.569862	0.553995	0.537707	0.589082	0.548531	0.550326	0.562873	0.542907	0.537183	0.522524	0.524362	0.533853	0.518377	0.481482	0.520168	0.498487	0.540778	0.528857	0.498424	0.462979	0.440052	0.442539	0.402091	0.387563	0.387742	0.39051	0.433683	0.53128	0.729385	0.832731	0.735561	0.813005	0.736518	0.770411	0.796908	0.806806	0.91012	0.963208	0.968803	0.976506	1.01146	1.12892	1.10666
0.948427	0.894095	0.637181	0.65892	0.634571	0.627703	0.634668	0.624626	0.637278	0.564318	0.554173	0.580046	0.611184	0.667937	0.710661	0.736347	0.689914	0.630024	0.689268	0.597521	0.572467	0.578017	0.522446	0.524531	0.534249	0.512975	0.483195	0.496428	0.458408	0.628674	0.589388	0.598359	0.626084	0.589641	0.709808	0.644664	0.559044	0.487521	0.596596	0.636792	0.594352	0.786051	0.758272	0.900953	0.946851	1.03934	1.14501	1.12732	0.988343	0.929575
0.778001	0.62499	0.658122	0.639597	0.759135	0.874747	0.688358	0.58915	0.631232	0.614911	0.545659	0.544536	0.528562	0.560052	0.570482	0.602795	0.630025	0.595551	0.548153	0.531043	0.558331	0.55611	0.547489	0.500683	0.506708	0.495217	0.503691	0.496953	0.47465	0.489065	0.479942	0.507606	0.5192	0.561896	0.655625	0.664609	0.693519	0.769378	0.737613	0.815367	0.888038	0.944441	0.981755	1.00126	0.993401	0.948774	0.944987	0.973218	0.979315	1.01933
0.763421	0.737416	0.703377	0.65762	0.740592	0.743544	0.755465	0.701656	0.700494	0.702973	0.669061	0.717667	0.66112	0.620722	0.638462	0.66968	0.658522	0.614819	0.647883	0.693201	0.616395	0.621061	0.644418	0.645187	0.575873	0.571353	0.624037	0.543254	0.62676	0.60507	0.61344	0.608002	0.669284	0.756741	0.685085	0.677796	0.743856	0.746757	0.811909	1.06467	0.881711	0.945105	0.91189	0.743905	0.811877	0.814463	0.679877	0.702845	1.05607	1.06332
0.514227	0.482558	0.398536	0.357551	0.333345	0.296174	0.303989	0.315888	0.298355	0.309951	0.367122	0.315098	0.38123	0.358555	0.333746	0.289874	0.310451	0.282087	0.255345	0.255157	0.241167	0.249259	0.248699	0.233528	0.23131	0.234464	0.236606	0.237733	0.254743	0.271392	0.291216	0.31154	0.327481	0.334348	0.404152	0.554801	0.748332	1.00133	1.10861	1.05994	1.03354	1.10167	1.07604	0.96813	1.03666	0.849989	0.94747	0.801523	0.859596	0.891063
0.816949	0.940381	0.841584	0.754258	0.79651	0.715717	0.61946	0.629671	0.536261	0.519794	0.514764	0.5057	0.508574	0.508278	0.494053	0.523637	0.530002	0.538575	0.596965	0.564554	0.570975	0.569688	0.656171	0.636752	0.655198	0.587255	0.608666	0.601372	0.612241	0.626692	0.699094	0.759679	0.863758	0.892027	0.91622	0.804783	0.78857	0.76109	0.749189	0.739088	0.7478	0.823492	1.02651	1.14133	1.12884	0.969873	0.970235	0.992526	0.974059	1.00381
0.745614	0.668493	0.588918	0.589349	0.595838	0.613536	0.636139	0.586606	0.584691	0.563636	0.500897	0.534145	0.513839	0.534209	0.527944	0.503698	0.52242	0.440328	0.436505	0.414126	0.416902	0.441468	0.433536	0.430711	0.440253	0.44	0.439289	0.479825	0.473484	0.498693	0.538272	0.551043	0.6244	0.639946	0.675412	0.769555	0.801122	0.809644	0.802166	0.785067	0.751805	0.711907	0.706722	0.736204	0.783081	0.837266	0.872152	0.935482	1.08735	1.17304
							0.764005	0.741029	0.703704	0.671591	0.647672	0.683321	0.650356	0.610154	0.652045	0.596779	0.620743	0.577004	0.633244	0.640737	0.603713	0.593706	0.612446	0.592154	0.591555	0.6056	0.654784	0.593072	0.605025	0.607389	0.543274	0.592266	0.665059	0.665258	0.720523	0.870552	1.10244	1.13122	1.14425	1.18817	1.13246	1.0852	1.08865	1.03553	1.09744	1.17847	1.29311	1.34423	1.36854
											0.727461	0.753065	0.63128	0.607328	0.603874	0.625281	0.59121	0.594747	0.533317	0.522431	0.518587	0.498104	0.481815	0.477391	0.493963	0.484446	0.441773	0.447755	0.416711	0.423254	0.409286	0.406076	0.407489	0.381944	0.369645	0.414043	0.408602	0.415629	0.406315	0.424198	0.437976	0.547235	0.673848	0.853139	0.877315	0.903288	0.883831	0.852636	0.831229
																				0.552046	0.501997	0.466664	0.539681	0.470663	0.50272	0.553582	0.513739	0.46859	0.548284	0.559386	0.570078	0.561461	0.602311	0.604329	0.636624	0.721745	0.787683	0.830062	0.937563	0.864002	1.02018	1.01288	0.973536	0.904245	0.893208	0.857292	0.927165	0.91603	0.899888
0.682207	0.65119	0.704378	0.684361	0.655643	0.649702	0.586446	0.471364	0.442725	0.44999	0.418149	0.381064	0.410655	0.40327	0.391967	0.428181	0.437851	0.408368	0.429674	0.409742	0.407056	0.453731	0.459154	0.423611	0.444011	0.448308	0.496584	0.514146	0.48576	0.555838	0.543116	0.569941	0.570001	0.599218	0.727323	0.769052	0.868182	0.911579	0.922783	0.947194	0.931913	1.03263	1.00778	1.07095	1.09464	1.17286	1.09481	1.15046	1.12635	1.11077
0.789273	0.754607	0.806363	0.719925	0.689563	0.799091	0.723246	0.707781	0.695877	0.635544	0.646749	0.656712	0.642286	0.602233	0.62842	0.635892	0.675463	0.67898	0.727311	0.656634	0.65069	0.600621	0.584337	0.582868	0.570408	0.619891	0.564345	0.553633	0.539548	0.551557	0.578165	0.579987	0.636293	0.674946	0.793369	0.856765	0.883114	0.809916	0.837285	0.864697	0.930973	1.12666	1.17579	1.00841	1.0156	1.13188	1.12308	1.10857	1.13487	1.10819
0.869353	0.847747	0.856319	0.880755	0.790723	0.754471	0.732189	0.665801	0.649328	0.694505	0.683693	0.594506	0.563981	0.525495	0.555349	0.514108	0.544058	0.52814	0.524466	0.531923	0.50806	0.517227	0.509487	0.499851	0.488243	0.524449	0.548758	0.521116	0.566341	0.535258	0.508679	0.530701	0.575354	0.541035	0.518962	0.557688	0.606098	0.601711	0.615992	0.623186	0.548454	0.601244	0.593919	0.638148	0.581039	0.662206	0.687362	0.781762	0.799206	0.790622
0.862974	0.962371	0.853662	0.831038	0.753662	0.755132	0.735178	0.64655	0.626054	0.629255	0.634972	0.639103	0.615651	0.626572	0.66454	0.617777	0.614536	0.620467	0.603784	0.619166	0.634562	0.630203	0.674791	0.640038	0.626298	0.675643	0.619992	0.709768	0.707124	0.623867	0.675077	0.627695	0.640836	0.677433	0.764428	0.758373	0.810491	1.16109	1.23952	1.26679	1.33265	1.24099	1.30727	1.27974	1.30292	1.33054	1.38977	1.51181	1.44755	1.48283
																				0.558666	0.547101	0.518464	0.526966	0.528062	0.489111	0.49101	0.50294	0.491359	0.463098	0.473551	0.464656	0.489289	0.470774	0.520469	0.622155	0.942211	1.13913	1.15106	1.02464	0.902472	0.852386	0.913012	0.93495	1.02774	1.08105	1.11509	1.11957	1.22435	1.15827
0.958745	0.958377	0.900138	0.833285	0.718816	0.706239	0.6823	0.612561	0.613464	0.640409	0.573465	0.568027	0.621264	0.606169	0.57857	0.596404	0.588122	0.598005	0.568325	0.549785	0.553665	0.537313	0.519755	0.514142	0.505007	0.477303	0.477493	0.436349	0.419063	0.424913	0.41644	0.380147	0.375646	0.347715	0.365667	0.360872	0.355083	0.403994	0.741677	0.997604	0.976558	1.12074	1.08731	1.02982	1.11799	1.10457	1.1413	1.18008	1.29223	1.25662
0.587867	0.618817	0.51186	0.471207	0.433072	0.382264	0.382042	0.357853	0.369384	0.384411	0.434594	0.438989	0.436744	0.471033	0.459362	0.467236	0.519094	0.478183	0.472651	0.517708	0.464684	0.438928	0.446838	0.448439	0.453611	0.486024	0.493373	0.511982	0.576847	0.673481	0.861462	1.08278	1.16491	1.27021	1.28405	1.27846	1.3496	1.38977	1.54318	1.5208	1.36542	1.45477	1.55325	1.25262	1.1758	1.15086	1.32472	1.36339	1.37586	1.36339
	0.735153	0.727022	0.60253	0.640004	0.606249	0.564516	0.492102	0.494765	0.533771	0.55219	0.542187	0.519481	0.5341	0.493636	0.480824	0.482794	0.491428	0.473899	0.486754	0.494423	0.471081	0.441767	0.432938	0.385428	0.357491	0.365247	0.353129	0.380322	0.417782	0.491671	0.596531	0.704402	0.726555	0.836454	0.965969	1.01581	1.08182	1.05316	1.09252	1.05551	1.15406	1.13265	1.07693	1.0841	1.02064	0.987639	1.02251	0.954989	1.05961
									0.811973	0.755504	0.734736	0.751422	0.738083	0.724568	0.703879	0.71466	0.718188	0.697847	0.694683	0.633135	0.606956	0.585755	0.515138	0.515517	0.489681	0.502052	0.47982	0.464743	0.470634	0.469702	0.488811	0.43924	0.412017	0.383761	0.390064	0.404059	0.539756	0.804683	0.926989	0.944193	1.03005	1.0482	1.05748	1.02328	1.0145	1.03381	1.06599	1.10209	1.17321
0.821506	0.742151	0.793166	0.812282	0.74768	0.839175	0.867555	0.794007	0.786227	0.84235	0.812621	0.763977	0.728214	0.673931	0.673022	0.649875	0.672661	0.617835	0.64797	0.598135	0.559879	0.600245	0.520881	0.474019	0.470403	0.474123	0.47231	0.470685	0.508729	0.491144	0.482321	0.533458	0.505245	0.555996	0.564285	0.512678	0.515301	0.569637	0.759677	1.02398	1.09613	1.25619	1.32276	1.28312	1.2329	1.3019	1.26525	1.22151	1.21828	1.28079
0.887334	0.821318	0.879199	0.838941	0.750472	0.727472	0.765915	0.666535	0.747992	0.672512	0.657984	0.627135	0.659546	0.626914	0.672252	0.680084	0.684786	0.666834	0.722504	0.666216	0.695015	0.648048	0.719442	0.717874	0.690167	0.670167	0.684685	0.71302	0.642194	0.682621	0.672703	0.665995	0.704537	0.69574	0.679171	0.638063	0.679352	0.703585	0.700192	0.716195	0.688205	0.681199	0.677817	0.634161	0.648801	0.672378	0.727934	0.854015	0.963215	1.08202
0.71195	0.681535	0.623479	0.566341	0.551958	0.537053	0.506726	0.534559	0.511176	0.497579	0.488385	0.458846	0.464146	0.460161	0.46534	0.428812	0.389738	0.381698	0.344374	0.372815	0.339193	0.32084	0.322615	0.325519	0.343848	0.325829	0.332765	0.338617	0.345618	0.3371	0.30553	0.316985	0.339744	0.335418	0.352543	0.351265	0.341005	0.347607	0.351726	0.364965	0.353074	0.377571	0.388712	0.418449	0.556855	0.843246	1.08887	1.13345	1.18682	1.18402
0.810825	0.799591	0.866273	0.875999	0.882445	0.87903	0.894856	0.91103	0.885112	0.920104	0.787545	0.759461	0.689747	0.690694	0.667816	0.685975	0.68151	0.634883	0.597629	0.579382	0.561892	0.648866	0.634419	0.575772	0.629584	0.627472	0.587517	0.627139	0.663233	0.651251	0.644953	0.620155	0.610808	0.679295	0.624514	0.658773	0.606719	0.582055	0.579561	0.66343	0.7948	1.15188	1.4289	1.44385	1.50739	1.57099	1.54618	1.67922	1.56908	1.71937
0.822594	0.788158	0.754357	0.705589	0.660083	0.684642	0.689931	0.692854	0.686942	0.660902	0.696114	0.733748	0.697872	0.681444	0.680824	0.682323	0.609939	0.568115	0.554527	0.55185	0.524482	0.526089	0.506873	0.490643	0.488819	0.505948	0.479474	0.508226	0.496781	0.499777	0.47623	0.471849	0.467766	0.467091	0.470207	0.557348	0.682937	0.784863	0.825355	0.917998	0.94027	0.937645	0.963072	1.01592	1.05667	1.12328	1.19574	1.19835	1.16594	1.21254
0.940781	1.00843	0.912934	0.873987	0.786713	0.78472	0.807146	0.805559	0.771028	0.765301	0.777917	0.767668	0.764851	0.75566	0.754285	0.727066	0.682064	0.669964	0.677869	0.701721	0.665195	0.616931	0.636717	0.634003	0.566032	0.544417	0.557232	0.621301	0.611931	0.611864	0.649553	0.637472	0.657472	0.673902	0.729475	0.657892	0.785243	0.828796	0.857062	0.88874	0.892782	1.00746	0.890914	0.925314	0.925649	0.873006	0.936144	0.994458	1.13285	1.16147
0.985589	0.880415	0.878412	0.881589	0.824007	0.820963	0.797954	0.87057	0.9311	0.854944	0.67248	0.637355	0.637804	0.581282	0.615922	0.622562	0.564688	0.532572	0.556129	0.559519	0.513342	0.517027	0.490937	0.488333	0.503586	0.545782	0.52453	0.553397	0.554605	0.56545	0.521867	0.52404	0.514351	0.499854	0.484926	0.473219	0.481325	0.492374	0.488055	0.498151	0.495737	0.478348	0.472324	0.502265	0.698787	0.878539	1.04657	1.09366	1.17932	1.1455
0.80766	0.660365	0.599052	0.566767	0.581039	0.590018	0.589598	0.59603	0.623123	0.639452	0.57245	0.597104	0.509322	0.481976	0.427133	0.433884	0.405942	0.403323	0.431144	0.361087	0.401901	0.372139	0.427714	0.478028	0.450449	0.429321	0.458525	0.43142	0.476499	0.461189	0.506003	0.488583	0.479367	0.512669	0.582103	0.641313	0.645034	0.780673	0.709715	0.823062	0.805447	0.725301	0.615637	0.698649	0.76141	0.74453	0.850978	1.06737	1.15884	1.19184
0.949538	0.76262	0.75441	0.77873	0.768682	0.791626	0.786577	0.782176	0.82618	0.764192	0.669048	0.683638	0.754336	0.729508	0.675489	0.656289	0.652467	0.677698	0.623867	0.572158	0.515719	0.531759	0.485753	0.537287	0.510385	0.47376	0.465768	0.476583	0.417999	0.448494	0.398145	0.395016	0.364897	0.377327	0.366152	0.353337	0.369944	0.356384	0.358864	0.376843	0.515249	0.993298	1.18096	1.27326	1.3331	1.28503	1.34408	1.37589	1.34453	1.31269
0.63446	0.606886	0.573012	0.501573	0.491358	0.497629	0.496378	0.526048	0.48464	0.518386	0.524142	0.494658	0.485167	0.466052	0.415938	0.401003	0.400058	0.408007	0.432506	0.482339	0.505698	0.471407	0.459513	0.436427	0.436067	0.440669	0.483917	0.491035	0.498298	0.48301	0.496345	0.536587	0.690353	1.09419	1.10889	1.10253	0.991974	0.971214	1.03829	1.04995	1.0663	1.09773	1.09038	1.09244	1.13671	1.16494	1.21101	1.21747	1.25706	1.33045
	0.864399	0.790674	0.749067	0.729642	0.756834	0.699481	0.691958	0.631391	0.621826	0.60294	0.580756	0.550253	0.559766	0.522323	0.559459	0.571423	0.551706	0.550101	0.63893	0.625593	0.638457	0.609059	0.577841	0.526628	0.558611	0.55946	0.589096	0.558346	0.524133	0.511572	0.565024	0.597277	0.596911	0.676495	0.692019	0.72424	0.748472	0.718837	0.770569	0.765254	0.85011	1.06534	1.21691	1.56787	1.36189	1.56164	1.38498	1.2416	1.21019
				0.691815	0.622628	0.577204	0.539024	0.572606	0.552307	0.546744	0.518685	0.568528	0.56197	0.59249	0.548448	0.584469	0.609856	0.554744	0.655671	0.825393	0.620351	0.704502	0.718543	0.744714	0.819773	0.746273	0.741776	0.739957	0.795947	0.746897	0.835596	0.810107	0.803201	0.787302	0.886531	0.825815	0.858702	0.871243	0.988279	1.20014	1.16478	1.18101	1.09963	0.979309	0.876324	0.945054	0.92885	0.945939	0.995044
								0.493126	0.504673	0.50665	0.474445	0.46369	0.463023	0.487065	0.463222	0.458843	0.446117	0.455765	0.451888	0.437762	0.450024	0.448605	0.46416	0.46038	0.455917	0.464166	0.464851	0.469168	0.447432	0.478299	0.503783	0.500171	0.474674	0.453935	0.440002	0.455231	0.458686	0.459858	0.488333	0.524584	0.566118	0.594156	0.648445	0.731078	0.827322	0.910213	0.936818	1.03001	1.13787
										0.44353	0.440433	0.439941	0.448172	0.437459	0.456092	0.466085	0.453809	0.411333	0.369771	0.390111	0.399493	0.355973	0.383916	0.409179	0.366037	0.371092	0.374441	0.34849	0.303745	0.328875	0.375133	0.390017	0.485894	0.811573	1.14073	1.26841	1.35595	1.33734	1.31547	1.28091	1.1952	1.21841	1.18803	1.25482	1.19354	1.24153	1.0926	1.10334	1.20492
																					0.880632	0.773863	0.910775	0.862404	0.838607	0.854272	0.800403	0.832521	0.763328	0.688708	0.687156	0.706394	0.648385	0.666194	0.741518	0.642339	0.637746	0.554979	0.593889	0.651637	0.665437	0.779699	0.815796	0.902551	0.924574	1.08912	1.1034	1.39117	1.43286
0.944345	0.795844	0.797551	0.760272	0.752131	0.759814	0.723339	0.737747	0.740489	0.731537	0.626657	0.612885	0.588519	0.527321	0.526428	0.500868	0.481696	0.484663	0.500663	0.525353	0.516749	0.529328	0.494051	0.494	0.492568	0.490645	0.541144	0.514311	0.538414	0.529522	0.560901	0.609201	0.794443	1.12184	1.25391	1.23671	1.225	1.30711	1.28365	1.27021	1.32513	1.27681	1.23716	1.31793	1.27862	1.26806	1.39419	1.32891	1.2591	1.31237
0.563461	0.554828	0.609936	0.569813	0.506012	0.511049	0.482868	0.464803	0.39167	0.385316	0.395017	0.350651	0.342423	0.350015	0.342594	0.357204	0.362428	0.354782	0.357391	0.37259	0.37966	0.365638	0.373722	0.385329	0.380856	0.394095	0.377831	0.364596	0.391234	0.389427	0.376778	0.383304	0.40113	0.598932	0.853011	1.0805	1.11269	1.1772	1.22042	1.26237	1.28769	1.37559	1.40285	1.42125	1.4406	1.39083	1.42363	1.31094	1.32547	1.3294
0.717126	0.665437	0.624549	0.555872	0.514622	0.480855	0.49645	0.455991	0.418058	0.405128	0.435054	0.39667	0.384485	0.376611	0.355224	0.366857	0.354718	0.38266	0.37508	0.389258	0.38208	0.394843	0.401456	0.402568	0.446344	0.420735	0.423224	0.387004	0.386577	0.380523	0.38899	0.392416	0.394694	0.372734	0.407329	0.378547	0.38618	0.383005	0.358452	0.364571	0.382621	0.692124	1.04125	1.16743	1.15263	1.16583	1.17748	1.16405	1.16032	1.19765
0.907534	0.803764	0.851115	0.883361	0.785904	0.690575	0.68378	0.64834	0.678159	0.640682	0.658025	0.64379	0.615169	0.674802	0.607132	0.622375	0.603308	0.612681	0.611453	0.624213	0.658572	0.593983	0.598959	0.632936	0.59642	0.567678	0.584697	0.52762	0.573358	0.596646	0.584454	0.621704	0.530256	0.561017	0.532261	0.569829	0.666235	1.00357	1.13577	1.14014	1.17706	1.16995	1.14219	1.14744	1.19335	1.16778	1.15743	1.23986	1.2616	1.41429
0.739366	0.716177	0.711112	0.741529	0.735234	0.707212	0.665149	0.630566	0.559184	0.57747	0.502933	0.498286	0.461538	0.498998	0.506134	0.483432	0.414243	0.395623	0.496389	0.418341	0.420436	0.443235	0.381132	0.477121	0.453244	0.459734	0.452606	0.481805	0.502358	0.531457	0.542058	0.541917	0.496492	0.525822	0.524019	0.576101	0.761953	0.801332	0.926424	0.984438	1.16701	1.08342	1.01002	0.968842	0.986233	0.946639	0.955054	0.972937	1.03119	1.0541
0.696771	0.685282	0.670414	0.684162	0.717805	0.647767	0.622972	0.619226	0.626331	0.677998	0.672253	0.640983	0.60525	0.621427	0.601755	0.528858	0.533616	0.512183	0.529073	0.527263	0.488946	0.502891	0.514272	0.50102	0.460114	0.444609	0.452435	0.483045	0.457616	0.515603	0.706237	0.763173	0.811301	0.84791	0.909163	0.91209	0.914208	0.945031	0.947847	1.09093	1.20011	1.17289	1.21221	1.2008	1.19362	1.24669	1.20598	1.28755	1.27766	1.47031
0.720138	0.684277	0.643933	0.626219	0.593601	0.579177	0.573768	0.576543	0.563754	0.576517	0.585601	0.573634	0.56084	0.583089	0.565178	0.549634	0.533662	0.533707	0.550403	0.542146	0.547217	0.508132	0.520442	0.558521	0.555203	0.583768	0.576725	0.543487	0.549048	0.559211	0.57228	0.568239	0.58801	0.640424	0.631789	0.641167	0.618283	0.651453	0.664065	0.741494	0.791554	0.752941	0.735566	0.736661	0.870521	0.872119	0.994701	1.02889	1.09942	1.07485
0.687233	0.724244	0.767725	0.833551	0.799555	0.79525	0.660574	0.659294	0.71056	0.625938	0.685468	0.772437	0.654471	0.658264	0.524317	0.510492	0.534098	0.470266	0.459492	0.461072	0.478416	0.447549	0.44903	0.423504	0.450079	0.466102	0.462291	0.474628	0.46575	0.465939	0.453074	0.512522	0.544047	0.679544	0.685666	0.737856	0.725464	0.555779	0.519222	0.517241	0.529974	0.527064	0.551096	0.581176	0.579868	0.598787	0.63848	0.745723	0.959257	1.10832
0.62107	0.673318	0.700049	0.692526	0.706721	0.693631	0.70751	0.651342	0.651494	0.632148	0.568	0.521728	0.493559	0.480779	0.418791	0.411725	0.395524	0.399762	0.398658	0.40971	0.447114	0.430489	0.41813	0.44945	0.471902	0.442372	0.451363	0.469364	0.486888	0.487294	0.496067	0.532104	0.501317	0.541889	0.758505	1.0933	1.10374	1.04374	0.989542	1.0747	1.05843	1.1124	1.06922	1.13714	1.18304	1.13911	1.06094	1.16768	1.1715	1.21639
0.749259	0.66226	0.72549	0.770687	0.661915	0.650582	0.623896	0.663764	0.738792	0.729991	0.678996	0.659329	0.702718	0.666961	0.677478	0.676443	0.612528	0.684995	0.674223	0.596521	0.604431	0.591089	0.622887	0.624797	0.63511	0.65716	0.629587	0.602952	0.622038	0.597306	0.604147	0.642729	0.592373	0.53129	0.530127	0.51717	0.496704	0.489738	0.520128	0.602237	0.706303	0.758572	0.73021	0.850615	1.11955	1.23572	1.27773	1.24477	1.27477	1.35945
		0.738174	0.734999	0.74461	0.791158	0.776432	0.634565	0.641056	0.561325	0.551495	0.53819	0.534386	0.501316	0.504377	0.563542	0.537797	0.512814	0.524831	0.4603	0.454238	0.480913	0.456228	0.438053	0.443856	0.436111	0.410983	0.384252	0.431569	0.443674	0.444257	0.491373	0.465017	0.463577	0.408859	0.399264	0.412816	0.483146	0.788158	1.09394	1.21069	1.26561	1.31218	1.34563	1.31991	1.23962	1.20435	1.2622	1.20539	1.32222
															0.644393	0.567254	0.547755	0.54729	0.522122	0.523702	0.490299	0.489438	0.486662	0.469273	0.453355	0.487551	0.482315	0.408415	0.437199	0.533138	0.475368	0.544614	0.622158	0.660368	0.667756	0.677501	0.723641	0.745311	0.722752	0.813507	0.756022	0.796388	0.981414	1.23181	1.47167	1.5613	1.42641	1.45543	1.23575
0.95299	0.79105	0.648901	0.598114	0.597543	0.559624	0.570107	0.584056	0.616364	0.592766	0.581991	0.490819	0.50821	0.489614	0.52552	0.511116	0.522745	0.502585	0.476395	0.510006	0.524166	0.508943	0.515743	0.462948	0.48364	0.457689	0.462004	0.457982	0.481357	0.493857	0.543335	0.569479	0.634467	0.633419	0.568795	0.611639	0.600216	0.585651	0.606646	0.530558	0.479604	0.453594	0.460684	0.468371	0.426868	0.43058	0.443103	0.432323	0.442421	0.518924
																			0.654742	0.597216	0.550896	0.571646	0.608681	0.553675	0.588691	0.539477	0.633015	0.641544	0.579659	0.519468	0.539117	0.613022	0.663817	0.662003	0.681101	0.689306	0.695781	0.693297	0.737789	0.931828	1.05613	1.05494	0.992025	1.05552	1.08104	1.11394	1.09682	1.08264	0.982457
0.943549	0.863356	0.835688	0.786611	0.912388	0.931339	0.790092	0.723764	0.614492	0.587488	0.597729	0.562925	0.521134	0.525766	0.517904	0.516775	0.503308	0.51171	0.47914	0.442235	0.49202	0.487269	0.513091	0.479103	0.460309	0.443202	0.453609	0.465421	0.479688	0.493352	0.500011	0.519251	0.506861	0.494591	0.529888	0.509138	0.619428	0.868744	1.0803	1.13828	1.13116	1.16351	1.17099	1.17055	1.18258	1.19381	1.18367	1.23254	1.349	1.31278
0.909203	0.939457	0.754954	0.709971	0.68082	0.718773	0.631569	0.677147	0.614623	0.648016	0.627722	0.605668	0.608046	0.577632	0.552431	0.507359	0.529312	0.490983	0.450134	0.420676	0.430982	0.4159	0.429688	0.403089	0.394236	0.388294	0.417852	0.442348	0.425997	0.412869	0.467108	0.512935	0.5112	0.537063	0.549927	0.543976	0.556333	0.586252	0.683124	0.822051	1.23703	1.37251	1.34683	1.3475	1.35993	1.44363	1.48849	1.53684	1.55777	1.50276
0.730924	0.681256	0.634567	0.662805	0.64208	0.713084	0.556538	0.714292	0.565688	0.456239	0.419172	0.415203	0.355942	0.438278	0.421151	0.460395	0.415822	0.411985	0.445171	0.425405	0.463584	0.458612	0.485645	0.44296	0.428393	0.469976	0.440829	0.456254	0.455116	0.433515	0.42683	0.413957	0.45096	0.416439	0.414383	0.459484	0.510298	0.657937	0.784531	0.772753	0.907944	1.08746	1.03023	1.01535	1.08777	1.10826	1.21514	1.27555	1.07899	1.07792
0.906494	0.87882	0.736153	0.688061	0.632877	0.575739	0.564672	0.528159	0.479959	0.391778	0.36474	0.335379	0.355109	0.334834	0.363473	0.349598	0.350698	0.319887	0.319175	0.308029	0.307532	0.290803	0.279489	0.255872	0.238301	0.230828	0.214299	0.205204	0.218531	0.211373	0.226214	0.225616	0.248729	0.258404	0.268728	0.286132	0.335061	0.364839	0.432385	0.546723	0.68368	0.783092	0.936082	0.988565	1.0616	1.06979	1.10381	1.13771	1.11069	1.16877
0.526231	0.678523	0.690308	0.776638	0.743482	0.726579	0.725731	0.678771	0.563553	0.537365	0.516435	0.457702	0.459721	0.45477	0.508398	0.465481	0.405729	0.4075	0.390388	0.376431	0.329845	0.322249	0.33014	0.368437	0.348512	0.389592	0.378133	0.355004	0.380651	0.397111	0.423861	0.445618	0.468384	0.547655	0.666398	0.718006	0.711487	0.750745	0.652084	0.646672	0.812616	0.893837	1.01049	1.05289	1.12865	1.14717	1.27975	1.27838	1.27152	1.23466
										0.848493	0.737621	0.739129	0.706514	0.674525	0.645744	0.541757	0.533082	0.521766	0.536759	0.485287	0.521049	0.528443	0.496833	0.482778	0.457624	0.489208	0.48483	0.568576	0.502356	0.443455	0.436077	0.421856	0.463954	0.544119	0.604438	0.820038	1.03233	1.09954	1.13494	1.24261	1.36644	1.53099	1.51177	1.486	1.39539	1.34846	1.38933	1.42095	1.4714
0.743758	0.752737	0.670713	0.610397	0.577004	0.594627	0.551626	0.554868	0.501664	0.498197	0.479056	0.468286	0.443985	0.446943	0.461293	0.45475	0.477425	0.473553	0.450069	0.456408	0.458921	0.45094	0.424816	0.415736	0.431638	0.428296	0.437652	0.414769	0.440928	0.469974	0.48335	0.496324	0.479713	0.498157	0.506368	0.529067	0.530899	0.542086	0.535278	0.558093	0.58343	0.635998	0.764558	0.942499	1.00943	1.02025	0.994067	1.06872	1.05629	0.984554
0.800958	0.774684	0.684184	0.666638	0.606007	0.552282	0.583798	0.566454	0.54337	0.559295	0.53636	0.514231	0.483293	0.509324	0.505315	0.602969	0.536262	0.50223	0.497381	0.467143	0.472354	0.459527	0.455325	0.421177	0.435134	0.447843	0.429666	0.452101	0.474188	0.485024	0.453898	0.45132	0.481911	0.514222	0.645773	0.815848	0.921569	1.0297	1.01813	0.977058	0.972171	0.927859	0.880248	0.838567	0.83315	0.795578	0.782021	0.848993	0.9371	1.06923
												0.753143	0.730045	0.677292	0.664344	0.666958	0.691693	0.688013	0.598734	0.600909	0.589134	0.576273	0.56522	0.552309	0.544812	0.531052	0.557119	0.526824	0.556906	0.570666	0.687275	0.967043	1.20275	1.35548	1.34437	1.35201	1.46346	1.40039	1.38715	1.34446	1.37994	1.34082	1.39393	1.31438	1.26955	1.28444	1.30562	1.35344	1.33662
0.961811	0.949249	0.796292	0.80436	0.727269	0.828368	0.637334	0.70771	0.705359	0.601693	0.508924	0.438251	0.415434	0.405579	0.396252	0.411797	0.443276	0.451552	0.470773	0.469916	0.481456	0.472537	0.483952	0.502123	0.535107	0.507633	0.482509	0.465499	0.504447	0.488746	0.537857	0.525193	0.487724	0.50968	0.513621	0.475224	0.467498	0.470429	0.481005	0.523672	0.711479	0.948986	0.981892	1.04077	0.957783	1.01751	0.935272	1.01143	1.0798	1.02311
0.807345	0.860569	0.759513	0.82804	0.756015	0.7576	0.753551	0.737869	0.815292	0.759816	0.753222	0.77286	0.678246	0.646802	0.635852	0.625734	0.563444	0.57452	0.618301	0.605536	0.552369	0.610242	0.553496	0.56818	0.557698	0.530664	0.591616	0.594282	0.64137	0.616978	0.803287	0.959498	1.14924	1.33051	1.33919	1.31933	1.3625	1.25051	1.16075	1.12178	1.17749	1.13529	1.15656	1.13501	1.11245	1.08153	0.977741	0.896208	0.817068	0.79826
0.887839	0.873475	0.826694	0.766539	0.814532	0.742366	0.772154	0.707269	0.661864	0.616459	0.573938	0.587134	0.556622	0.519004	0.472007	0.486595	0.473897	0.475395	0.438866	0.452604	0.483652	0.444119	0.426872	0.428118	0.419409	0.438337	0.436535	0.420264	0.413329	0.397917	0.383555	0.386581	0.379564	0.358614	0.364621	0.341578	0.341549	0.318444	0.355403	0.347104	0.346791	0.365937	0.354919	0.367756	0.394851	0.418126	0.440628	0.499531	0.597277	1.00779
0.977365	0.930402	0.99131	0.889596	0.801327	0.814181	0.850627	0.811191	0.803191	0.834909	0.746705	0.684725	0.666916	0.716764	0.707356	0.702551	0.68037	0.727266	0.704152	0.735351	0.721415	0.724991	0.722756	0.706205	0.679869	0.66042	0.708891	0.718306	0.76886	0.783653	0.754797	0.783886	0.782109	0.77731	0.777709	0.801495	0.866892	0.81675	0.900324	0.874326	0.865278	0.847546	0.840881	0.853609	0.795245	0.804928	0.834048	0.854286	0.988041	0.992139
0.678045	0.70912	0.695371	0.697185	0.632345	0.562919	0.519088	0.513765	0.499821	0.54576	0.560163	0.597049	0.578815	0.550517	0.577513	0.561454	0.561466	0.555759	0.549268	0.513699	0.489578	0.471105	0.501662	0.500202	0.473473	0.480709	0.457457	0.462159	0.477087	0.451198	0.451559	0.472326	0.465774	0.457764	0.484538	0.476245	0.515284	0.511823	0.585007	0.741245	0.760152	0.768724	0.783243	0.768993	0.766451	0.827826	0.951831	0.965314	0.975759	0.958736
0.961474	0.80473	0.812962	0.786171	0.712042	0.7004	0.679447	0.71471	0.605059	0.578662	0.539196	0.545081	0.536397	0.513104	0.474316	0.539352	0.546161	0.539838	0.555433	0.510815	0.548898	0.544698	0.585408	0.47866	0.484428	0.482981	0.474741	0.473594	0.453693	0.44948	0.426495	0.47525	0.49669	0.494834	0.522675	0.52452	0.502898	0.523277	0.529416	0.501895	0.502313	0.527559	0.545489	0.688132	1.00111	1.0983	1.14017	1.13976	1.17305	1.21496
0.825902	0.754293	0.693638	0.680344	0.592228	0.573476	0.561392	0.522615	0.494575	0.477692	0.504733	0.483881	0.459699	0.441745	0.45354	0.475452	0.472201	0.495004	0.461242	0.47602	0.442427	0.434461	0.408054	0.415399	0.365815	0.361752	0.363312	0.325922	0.344983	0.334363	0.323239	0.368298	0.342503	0.34755	0.394281	0.386438	0.365333	0.400734	0.404557	0.447086	0.671079	0.911461	0.939027	0.997143	0.972963	0.789428	0.870147	1.05111	1.06484	1.12916
0.864406	0.896353	0.915707	0.802564	0.799102	0.825404	0.835266	0.782537	0.753381	0.726207	0.615463	0.619517	0.722189	0.673438	0.725494	0.713443	0.653247	0.662224	0.647587	0.655564	0.553024	0.526798	0.52706	0.528156	0.521315	0.519635	0.493454	0.465879	0.497352	0.496173	0.614311	0.5309	0.56449	0.626107	0.729593	0.881786	0.99835	1.01249	1.10575	1.12092	1.09686	1.02493	1.00527	1.09446	1.17019	1.26553	1.34356	1.40932	1.36358	1.39363
0.859383	1.00019	0.944676	0.836664	0.794081	0.831194	0.746456	0.675371	0.715288	0.736509	0.748705	0.778746	0.762955	0.713768	0.687312	0.616121	0.62327	0.58784	0.569584	0.583405	0.566498	0.538347	0.545179	0.517835	0.538039	0.546015	0.532046	0.542625	0.501946	0.510617	0.470069	0.493741	0.494438	0.49277	0.520437	0.468313	0.481973	0.503805	0.525252	0.532035	0.625469	0.760969	1.02399	1.1672	1.13028	1.11785	1.04478	1.11763	1.15026	1.09108
		0.766007	0.757612	0.722447	0.728524	0.723769	0.717804	0.682207	0.737628	0.758465	0.697438	0.707973	0.648393	0.688129	0.618353	0.659828	0.581184	0.585771	0.563692	0.598865	0.643286	0.594332	0.532797	0.540501	0.473721	0.496509	0.501288	0.517665	0.509477	0.561837	0.597022	0.588229	0.696869	0.842997	0.901774	0.889768	0.850036	0.866733	0.945564	1.03134	1.08861	1.06924	1.05674	0.977439	1.00361	0.981141	1.03993	1.17117	1.15326
0.896395	0.723962	0.688281	0.661448	0.723305	0.756619	0.649711	0.632369	0.55529	0.525329	0.49415	0.468471	0.43058	0.446843	0.378472	0.408359	0.440028	0.456679	0.439479	0.433253	0.452431	0.396747	0.410911	0.427856	0.440455	0.394238	0.399432	0.397883	0.40678	0.433476	0.445066	0.466549	0.46829	0.521566	0.518781	0.548796	0.588143	0.630359	0.650768	0.656072	0.730499	0.786043	0.813476	0.931523	1.17542	1.11474	1.27107	1.12581	1.15185	1.04213
0.832776	0.833958	0.853497	0.874757	0.850178	0.797563	0.820459	0.844841	0.857365	0.840177	0.783692	0.7555	0.755584	0.73532	0.697436	0.708005	0.753827	0.714882	0.747703	0.709675	0.66942	0.675393	0.587265	0.634621	0.608573	0.638097	0.613281	0.672906	0.776299	0.762879	0.803972	0.712944	0.704551	0.580371	0.629368	0.617525	0.730924	1.0754	1.13384	1.17648	1.14044	1.23621	1.29914	1.33004	1.27604	1.22926	1.34346	1.36581	1.34972	1.37636
0.52612	0.55241	0.531062	0.497187	0.492049	0.484944	0.472106	0.438268	0.414494	0.420289	0.394499	0.392122	0.409559	0.406463	0.388405	0.376464	0.347786	0.355663	0.370318	0.338302	0.360338	0.407597	0.370027	0.356544	0.350407	0.373739	0.368272	0.332764	0.334301	0.35349	0.366684	0.422622	0.415684	0.410095	0.415668	0.596203	0.784522	1.00043	0.99914	1.05605	1.14631	1.13579	1.00288	1.09049	1.11949	1.1821	1.26999	1.20306	1.33587	1.38129
																			0.911325	0.950101	0.839218	0.884624	0.857748	0.763534	0.784265	0.822065	0.766094	0.796533	0.803838	0.789523	0.742383	0.697642	0.608394	0.621185	0.610822	0.729303	0.68857	0.654046	0.630886	0.622696	0.502582	0.440665	0.4185	0.74612	0.937774	1.02898	0.99001	1.01157	1.07825
0.856619	0.804635	0.799293	0.794502	0.742181	0.795861	0.732885	0.790446	0.747899	0.786422	0.726474	0.655477	0.644208	0.671737	0.724199	0.720586	0.664114	0.644154	0.5911	0.570654	0.537496	0.543384	0.535314	0.565869	0.591525	0.541176	0.551477	0.542059	0.575604	0.540274	0.53918	0.532711	0.512086	0.495673	0.492854	0.477171	0.471276	0.448225	0.45821	0.47493	0.456044	0.451716	0.487093	0.542044	0.676105	0.887657	1.00246	1.09411	1.16158	1.14212
0.802504	0.685625	0.764494	0.697322	0.715543	0.699966	0.693031	0.707777	0.699134	0.753811	0.755489	0.694868	0.691228	0.650258	0.576644	0.59502	0.638059	0.583721	0.589986	0.589845	0.621917	0.584577	0.563525	0.538552	0.53613	0.535866	0.530324	0.501883	0.520709	0.483049	0.478813	0.491374	0.510691	0.513261	0.500722	0.512288	0.502485	0.48924	0.510924	0.550906	0.686384	0.923289	1.19266	1.24692	1.29475	1.28239	1.22394	1.20419	1.2231	1.1573
	0.954351	0.909817	0.845718	0.846969	0.761144	0.798735	0.743996	0.708154	0.662356	0.606892	0.609231	0.572504	0.557107	0.535114	0.564531	0.538614	0.558011	0.531984	0.563952	0.56506	0.556398	0.582304	0.55785	0.568096	0.549099	0.546759	0.576911	0.544385	0.497918	0.515841	0.515592	0.518551	0.502556	0.564517	0.531218	0.575397	0.605443	0.638794	0.88404	1.08311	1.2147	1.15427	1.17389	1.14964	1.07021	1.1161	1.17786	1.147	1.1716
						0.846374	0.827035	0.694787	0.696435	0.661871	0.574942	0.575376	0.574959	0.559103	0.56133	0.583324	0.562679	0.588642	0.589532	0.58019	0.619182	0.626411	0.694488	0.630328	0.547088	0.557585	0.561337	0.553964	0.620371	0.730828	0.886167	0.902296	0.903193	0.999898	1.01275	0.989787	1.15078	1.22043	1.28977	1.15663	1.13863	1.17188	1.21227	1.06512	1.03491	0.945672	0.929818	0.995546	0.986354
							0.798971	0.786444	0.782949	0.67029	0.644318	0.633928	0.618419	0.625012	0.583948	0.607467	0.544484	0.60257	0.529798	0.502	0.516981	0.484426	0.4896	0.501033	0.510821	0.478454	0.474257	0.475565	0.472335	0.525934	0.505923	0.499474	0.519221	0.520324	0.539427	0.555612	0.595644	0.641713	0.743685	0.796309	1.2101	1.24324	1.26109	1.22524	1.05099	1.08541	1.22669	1.28253	1.1568
0.780647	0.733258	0.723466	0.716121	0.625657	0.586481	0.554844	0.502472	0.48139	0.465105	0.425351	0.428875	0.442212	0.424092	0.441117	0.483007	0.518669	0.51341	0.529129	0.541065	0.395987	0.412792	0.451193	0.4406	0.502275	0.454766	0.488229	0.423868	0.459748	0.405602	0.443641	0.446421	0.429143	0.41645	0.426272	0.438931	0.430173	0.576658	1.03571	1.07076	1.08054	0.990919	0.978434	1.05352	1.15542	1.18325	1.14787	1.19824	1.24285	1.22445
0.845758	0.776394	0.759044	0.777933	0.666635	0.638426	0.640992	0.694969	0.671914	0.676194	0.609341	0.606262	0.60772	0.588476	0.60951	0.5939	0.593696	0.595886	0.604008	0.578683	0.631829	0.61834	0.594258	0.641049	0.61482	0.626455	0.64373	0.622893	0.611084	0.704601	0.710154	0.688837	0.707474	0.601664	0.673444	0.642953	0.642537	0.652447	0.626088	0.631243	0.620056	0.57266	0.58927	0.597796	0.615834	0.630308	0.770077	0.851106	1.05277	1.05986
0.997562	0.972832	0.924173	0.919237	0.8137	0.707674	0.704816	0.656847	0.676899	0.598722	0.647057	0.563533	0.60852	0.513407	0.510974	0.508777	0.513669	0.65895	0.528997	0.560642	0.579875	0.554796	0.519261	0.547523	0.504181	0.547464	0.568481	0.515661	0.52155	0.528805	0.521112	0.507439	0.548337	0.590014	0.597877	0.637524	0.93286	1.16407	1.19783	1.21634	1.25928	1.25931	1.22577	1.34273	1.47389	1.49319	1.53421	1.60284	1.59401	1.55427
0.912143	0.784585	0.672631	0.656588	0.614323	0.622774	0.615281	0.623215	0.668839	0.664268	0.658009	0.661135	0.640757	0.664857	0.621748	0.589691	0.606529	0.54791	0.598147	0.603568	0.591619	0.594526	0.590254	0.623197	0.540409	0.577299	0.636984	0.58957	0.531921	0.545652	0.555511	0.513212	0.584949	0.596864	0.623752	0.652365	0.706084	0.681982	0.7614	0.783232	0.940918	1.18206	1.12751	1.04037	1.2089	1.2639	1.42122	1.45747	1.41851	1.44338
0.585941	0.579976	0.563786	0.6413	0.624307	0.69993	0.641926	0.573815	0.50594	0.515365	0.550272	0.554338	0.555808	0.581901	0.529432	0.511643	0.49142	0.505099	0.514964	0.508507	0.507527	0.500957	0.43973	0.426427	0.430327	0.46016	0.43608	0.422676	0.459233	0.450162	0.410808	0.42426	0.501352	0.482422	0.471225	0.516966	0.541295	0.6586	0.971976	1.26906	1.22799	1.21515	1.27025	1.27735	1.33082	1.35664	1.42817	1.62016	1.49929	1.49101
	0.838089	0.791498	0.750557	0.801142	0.805753	0.800827	0.873435	0.830092	0.843795	0.811957	0.817308	0.747983	0.709987	0.717952	0.658884	0.656228	0.629592	0.561248	0.612636	0.531128	0.543342	0.582211	0.577247	0.569827	0.574494	0.490195	0.4562	0.483687	0.492219	0.537554	0.534805	0.599284	0.733103	0.762632	0.864044	0.903391	0.957769	0.966127	1.04819	1.05618	1.15256	1.14154	1.15542	1.13259	1.25296	1.07915	1.09722	1.12061	1.09092
						0.724821	0.714849	0.708845	0.671833	0.717925	0.707232	0.607185	0.623709	0.583537	0.526541	0.502486	0.516542	0.494677	0.498315	0.471786	0.513327	0.518397	0.498277	0.477875	0.508874	0.496367	0.649309	1.06014	1.23119	1.17043	1.12348	1.11282	1.1338	0.957322	0.844198	0.74081	0.669736	0.648523	0.737707	1.00539	1.17316	1.12361	1.03455	0.932897	0.817696	0.781204	0.7811	0.773745	0.870407
0.856309	0.953286	0.923081	0.903794	0.875962	0.816807	0.782341	0.747022	0.786284	0.713905	0.778885	0.747158	0.812712	0.755363	0.68578	0.654456	0.671523	0.727741	0.673877	0.689186	0.65269	0.658541	0.692617	0.680508	0.711819	0.673378	0.698545	0.68193	0.666225	0.664576	0.712714	0.629863	0.626168	0.634512	0.653159	0.615927	0.612897	0.604643	0.616795	0.574643	0.597237	0.582046	0.622419	0.650284	0.734165	0.908396	1.06233	1.14041	1.17196	1.23911
0.665548	0.631578	0.585314	0.546098	0.542687	0.466164	0.399173	0.433408	0.442388	0.420666	0.439038	0.393201	0.427578	0.382474	0.467945	0.426217	0.429652	0.384512	0.406575	0.404565	0.401624	0.413851	0.451424	0.496636	0.502514	0.450836	0.439971	0.427258	0.450092	0.438494	0.422951	0.412083	0.445538	0.422355	0.426558	0.398131	0.388825	0.38659	0.431409	0.679584	0.92129	0.978066	1.05488	1.0121	1.02496	1.07285	1.01886	1.00609	0.956169	0.953951
0.987053	0.822635	0.851365	0.893043	0.829589	0.81157	0.712836	0.786458	0.739336	0.687364	0.697747	0.673314	0.7351	0.662878	0.646503	0.637346	0.654988	0.599089	0.633566	0.613126	0.633877	0.626162	0.647508	0.618739	0.601237	0.606447	0.623468	0.628185	0.62105	0.60476	0.698656	0.718163	0.719997	0.730211	0.659127	0.652692	0.658246	0.688114	0.712608	0.758189	0.762219	0.742207	0.839083	0.91802	0.961577	1.00388	1.12063	1.1757	1.16946	1.2277
0.641481	0.769361	0.759513	0.796495	0.777948	0.897317	0.884574	0.838765	0.792419	0.754488	0.700893	0.694216	0.601874	0.478229	0.410235	0.370744	0.408571	0.497154	0.450414	0.465598	0.433211	0.43844	0.447451	0.428518	0.395382	0.375052	0.365038	0.386249	0.433161	0.412337	0.447749	0.748476	1.08086	1.0341	1.05959	0.967292	1.01247	0.95242	1.02739	1.0873	1.18329	1.21749	1.20269	1.18841	1.16926	1.20954	1.27804	1.2631	1.28454	1.28418
0.875466	0.76862	0.741969	0.679322	0.642325	0.749817	0.676286	0.647319	0.695191	0.741033	0.634428	0.690517	0.68276	0.573025	0.556426	0.626465	0.650182	0.672544	0.690611	0.654508	0.633028	0.580791	0.564651	0.53911	0.608162	0.591599	0.598518	0.633874	0.58022	0.577367	0.763872	1.13107	1.26668	1.33323	1.22175	1.19827	1.12928	1.1342	1.20801	1.06857	1.10566	1.09833	1.09573	1.09974	1.08339	1.07893	1.08915	1.05037	1.1033	1.03564
0.963085	0.842531	0.87957	0.881772	0.857791	0.839019	0.743098	0.758604	0.734109	0.746966	0.71488	0.668454	0.613181	0.551896	0.546753	0.528632	0.544464	0.515263	0.483869	0.491579	0.481961	0.506838	0.476124	0.497598	0.494555	0.481331	0.437461	0.439758	0.445096	0.419267	0.395252	0.439884	0.429403	0.425503	0.446251	0.53712	0.762396	1.01075	1.1913	1.31123	1.37506	1.32768	1.40992	1.46052	1.41819	1.38753	1.31843	1.31329	1.27833	1.4049
0.778672	0.631289	0.61193	0.55402	0.500166	0.492262	0.459295	0.414949	0.39034	0.373892	0.371906	0.377143	0.370699	0.377339	0.402173	0.400752	0.412673	0.400211	0.403061	0.361725	0.369982	0.378236	0.369807	0.349943	0.348548	0.342428	0.329747	0.339029	0.345429	0.340261	0.337009	0.32498	0.343682	0.342729	0.365155	0.38682	0.371512	0.415543	0.442831	0.432194	0.45022	0.430824	0.454413	0.47565	0.489313	0.491291	0.519343	0.662336	0.781649	0.738468
0.727364	0.626546	0.577375	0.569337	0.537253	0.533552	0.58453	0.611938	0.59097	0.665391	0.59524	0.548542	0.503745	0.497912	0.474213	0.504889	0.490542	0.488359	0.489979	0.496805	0.4626	0.456849	0.437752	0.435881	0.456913	0.4854	0.469106	0.445589	0.442807	0.446521	0.422458	0.431089	0.446216	0.465335	0.558853	0.719001	0.973053	1.18833	1.23246	1.20143	1.17062	1.09835	1.15625	1.15784	1.12449	1.16312	1.0644	1.09811	1.15269	1.21705
0.648751	0.640615	0.650804	0.707198	0.781808	0.734463	0.812907	0.789707	0.699703	0.670316	0.665071	0.593867	0.541752	0.574829	0.615219	0.613897	0.650415	0.556054	0.579624	0.56439	0.680792	0.671788	0.678403	0.659208	0.577882	0.614697	0.547122	0.544162	0.522056	0.470557	0.479247	0.502708	0.464183	0.458692	0.464942	0.58024	0.571727	0.752543	0.741467	0.866761	0.977913	1.00842	1.02902	1.05859	1.01513	1.12496	1.10556	1.17502	1.0702	1.08332
0.789687	0.930578	0.86929	0.851881	0.823753	0.716246	0.6857	0.590286	0.662752	0.526995	0.556906	0.553264	0.539414	0.524679	0.538786	0.532564	0.536708	0.575051	0.589168	0.563332	0.602318	0.600004	0.650048	0.636524	0.64041	0.648323	0.602667	0.636768	0.639681	0.568069	0.606476	0.637173	0.623722	0.578766	0.555157	0.589698	0.608931	0.557657	0.581985	0.591612	0.594104	0.581743	0.606351	0.759917	1.03661	1.13918	1.16051	1.21076	1.23566	1.29842
0.822137	0.830469	0.81611	0.783075	0.71133	0.66573	0.656577	0.6615	0.581926	0.618149	0.564925	0.621665	0.62786	0.651603	0.628404	0.65873	0.619517	0.694872	0.606054	0.574116	0.590645	0.598499	0.596881	0.587705	0.56457	0.515276	0.545008	0.525362	0.568562	0.716732	0.888783	1.21099	1.32007	1.33636	1.39593	1.58211	1.38859	1.25361	1.26254	1.37265	1.36085	1.41835	1.36986	1.36579	1.33486	1.25058	1.35456	1.3477	1.41467	1.26084
0.878533	0.796301	0.817559	0.832648	0.717064	0.711118	0.717991	0.73459	0.724405	0.71342	0.705949	0.764666	0.718967	0.728169	0.70971	0.664366	0.633773	0.709048	0.617727	0.603383	0.661504	0.598456	0.578016	0.490694	0.484857	0.490198	0.502854	0.482383	0.467981	0.53232	0.5681	0.822398	0.975486	1.00244	1.00431	1.04724	1.13808	1.14455	1.13251	1.15485	1.19563	1.29311	1.29025	1.35729	1.39262	1.33358	1.39693	1.42688	1.40646	1.51358
0.668131	0.688789	0.741219	0.753954	0.761744	0.914281	0.77818	0.759884	0.690018	0.660358	0.656261	0.623275	0.608838	0.63225	0.673867	0.593924	0.592442	0.608717	0.551044	0.562659	0.526719	0.54736	0.507734	0.604185	0.575132	0.576411	0.516446	0.478533	0.501379	0.479955	0.475754	0.549351	0.512053	0.522496	0.519611	0.523663	0.547407	0.576431	0.505294	0.5394	0.576134	0.587217	0.736554	0.934872	0.978061	0.991036	1.00907	0.982283	1.14364	1.28808
0.863438	0.828799	0.858909	0.843514	0.805569	0.69738	0.683712	0.70315	0.644864	0.653448	0.55173	0.536907	0.490859	0.476201	0.451744	0.405535	0.433725	0.452812	0.41585	0.423089	0.400526	0.422536	0.435931	0.425735	0.420592	0.391299	0.418675	0.428257	0.431983	0.431948	0.426263	0.415549	0.426412	0.466363	0.556322	0.648951	0.798269	0.93395	1.074	1.11445	1.29542	1.2443	1.28868	1.33606	1.32755	1.47659	1.61717	1.5946	1.6304	1.61279
0.844468	0.70788	0.709897	0.672973	0.634232	0.550037	0.538919	0.538071	0.50382	0.496747	0.511757	0.512205	0.493989	0.514083	0.468309	0.499977	0.518054	0.484367	0.47279	0.493934	0.48791	0.507962	0.501706	0.507561	0.51091	0.507413	0.516447	0.505081	0.502604	0.496649	0.488265	0.460264	0.439155	0.396893	0.362697	0.375912	0.418988	0.482955	0.75644	0.915741	1.03123	1.17257	1.25073	1.22734	1.25297	1.25797	1.23275	1.23093	1.23129	1.22396
0.56664	0.608672	0.704942	0.660306	0.642878	0.696666	0.717047	0.717408	0.676688	0.694203	0.734124	0.741217	0.758278	0.819788	0.645797	0.647528	0.702719	0.628268	0.596101	0.598243	0.593352	0.528718	0.490576	0.453892	0.457257	0.491184	0.510432	0.558547	0.545222	0.536416	0.504359	0.531804	0.5197	0.540643	0.552422	0.594022	0.62324	0.656553	0.75328	0.697656	0.657567	0.687978	0.71148	0.740856	0.796735	0.803329	0.85776	0.952568	1.11114	1.18565
0.839647	0.839546	0.766207	0.758092	0.732843	0.761773	0.787927	0.785508	0.821629	0.804604	0.793602	0.83561	0.804397	0.765623	0.758061	0.672605	0.578369	0.611498	0.579245	0.563215	0.576561	0.580318	0.536593	0.513728	0.50475	0.513341	0.444577	0.47182	0.470435	0.484667	0.501846	0.431603	0.456337	0.470449	0.487923	0.519036	0.603182	0.772213	1.06328	1.18175	1.29714	1.31224	1.30461	1.20797	1.35803	1.39661	1.37702	1.48545	1.39794	1.38252
0.781239	0.623125	0.547134	0.534598	0.511511	0.472011	0.476942	0.501455	0.483391	0.489879	0.501757	0.515974	0.508966	0.50044	0.496666	0.49495	0.443677	0.487488	0.48889	0.482006	0.498844	0.511156	0.490594	0.49282	0.474145	0.437181	0.467233	0.458662	0.478305	0.446931	0.45168	0.446992	0.424059	0.414157	0.392501	0.375803	0.384485	0.381543	0.397183	0.379202	0.382842	0.389288	0.38673	0.409743	0.415192	0.427374	0.494857	0.594641	0.659683	0.773178
0.750735	0.717151	0.602349	0.572432	0.543645	0.47325	0.496447	0.483114	0.505303	0.467678	0.506616	0.531249	0.486899	0.504771	0.479853	0.508812	0.492965	0.505684	0.525887	0.522196	0.512905	0.512843	0.479409	0.455501	0.450662	0.45067	0.42194	0.482458	0.449771	0.503041	0.525294	0.563971	0.615321	0.755463	0.992469	1.12352	1.19654	1.10131	1.10324	1.14974	1.17882	1.29704	1.32758	1.34026	1.38004	1.39464	1.4675	1.37206	1.34444	1.42616
0.584098	0.550808	0.512532	0.473286	0.493956	0.440139	0.422759	0.406445	0.385834	0.364185	0.369524	0.388988	0.38549	0.394084	0.390919	0.412048	0.373302	0.405464	0.385961	0.387833	0.385579	0.371517	0.36897	0.380113	0.361568	0.354209	0.337931	0.324589	0.329967	0.326595	0.371376	0.36731	0.374113	0.377264	0.377762	0.385339	0.38997	0.409468	0.415508	0.435757	0.457243	0.481777	0.485161	0.490352	0.548637	0.627265	0.812282	1.04371	1.15663	1.17438
0.839922	0.882186	0.805293	0.751448	0.679216	0.609078	0.632407	0.607865	0.553914	0.540372	0.497331	0.453359	0.476312	0.463651	0.434392	0.456963	0.477733	0.493268	0.467554	0.482749	0.48683	0.436734	0.432322	0.444638	0.450409	0.448775	0.447398	0.437856	0.446822	0.420172	0.431887	0.437308	0.434052	0.440694	0.444827	0.478952	0.571968	0.812272	0.950747	1.03236	1.06129	1.06276	1.05259	1.03552	1.02779	0.997373	1.08593	1.13608	1.22752	1.20693
0.530156	0.475887	0.462803	0.452996	0.453428	0.432047	0.403335	0.395652	0.390524	0.351033	0.317533	0.338475	0.300223	0.303307	0.31779	0.327816	0.366804	0.377175	0.381475	0.372211	0.343594	0.360969	0.355038	0.370475	0.360951	0.348341	0.357685	0.38347	0.52063	0.716591	0.880657	0.998172	1.05841	1.03875	1.07954	1.09365	1.1301	1.15213	1.24535	1.29704	1.30869	1.27181	1.31407	1.29766	1.33449	1.29121	1.15995	0.967132	0.962036	0.944641
0.47962	0.423292	0.488685	0.560865	0.58223	0.503171	0.477849	0.511057	0.696847	0.469735	0.488745	0.600903	0.418394	0.422602	0.487891	0.383292	0.404989	0.386488	0.336007	0.373189	0.340697	0.417452	0.3547	0.397826	0.373315	0.389997	0.387627	0.392499	0.393864	0.381198	0.413226	0.372282	0.363671	0.350499	0.321164	0.342662	0.346636	0.33313	0.34811	0.356235	0.447323	0.583602	0.717726	0.85294	0.930758	1.01143	1.08166	1.03828	1.15219	1.22282
0.988443	0.957107	0.979387	0.94222	0.848182	0.869537	0.80186	0.810795	0.862275	0.763784	0.752684	0.71233	0.701441	0.694422	0.724127	0.659044	0.664385	0.641107	0.643707	0.686112	0.655408	0.627116	0.68054	0.669484	0.670097	0.677361	0.690884	0.684904	0.698695	0.687974	0.658341	0.677548	0.672522	0.700323	0.657106	0.678668	0.695347	0.694065	0.696273	0.748305	0.691476	0.719003	0.651486	0.607518	0.667899	0.728835	0.751029	0.89737	1.15851	1.2501
													0.879273	0.858442	0.967126	0.851347	0.945737	0.871607	0.832984	0.814447	0.801789	0.804842	0.792924	0.816389	0.78816	0.713702	0.756085	0.744432	0.679989	0.6638	0.652753	0.645968	0.64376	0.652972	0.631843	0.691925	0.770012	0.921603	0.915811	0.857287	0.82931	0.767319	0.77621	0.75819	0.808384	0.834179	0.887313	0.901519	0.911922
0.979414	0.891151	0.831526	0.868142	0.789537	0.788347	0.779286	0.764584	0.779249	0.848292	0.806334	0.793857	0.771959	0.793793	0.771737	0.754754	0.798786	0.725015	0.770132	0.785893	0.773303	0.809184	0.816974	0.85169	0.709477	0.679277	0.718602	0.767658	0.730148	0.758595	0.795286	0.693991	0.682712	0.848063	0.779742	0.673362	0.620741	0.569387	0.521612	0.509852	0.584222	0.697919	0.788257	0.912628	0.897353	0.956116	0.994505	0.957776	1.03454	1.02468
0.854371	0.780173	0.879716	0.830995	0.865254	0.900098	0.855212	0.801549	0.76037	0.726424	0.691461	0.715622	0.669084	0.632868	0.628123	0.575641	0.533543	0.557904	0.524959	0.521694	0.61049	0.629044	0.564221	0.546659	0.539081	0.474179	0.450634	0.416566	0.396248	0.450696	0.479395	0.503157	0.460028	0.540443	0.530288	0.589528	0.626074	0.614485	0.627918	0.69263	0.826007	0.946831	0.95933	0.954017	0.951973	0.955112	1.04925	1.06712	1.13786	1.09043
		0.815596	0.734125	0.658219	0.619409	0.596058	0.590343	0.589112	0.592047	0.551257	0.529296	0.541422	0.506107	0.471626	0.445851	0.428964	0.471368	0.459726	0.435783	0.428858	0.428638	0.440534	0.411317	0.404367	0.36855	0.39029	0.434694	0.396451	0.416275	0.444367	0.442043	0.531575	0.548749	0.5611	0.635968	0.674556	0.734084	0.790254	0.745747	0.791953	0.891898	0.831419	0.889417	0.897752	1.01943	1.17007	1.21739	1.22599	1.22258
																				0.81514	0.760012	0.780018	0.779722	0.741679	0.703028	0.679848	0.729022	0.793576	0.940338	1.08949	1.05628	0.99039	1.02816	1.06592	1.13494	1.30923	1.27815	1.22501	1.4842	1.36274	1.4329	1.32368	1.29753	1.25225	1.32777	1.23633	1.2895	1.20271	1.24981
0.987714	0.905032	0.83557	0.779411	0.806824	0.782367	0.721964	0.755375	0.778303	0.774586	0.739544	0.744095	0.740635	0.709241	0.676911	0.650137	0.610013	0.6238	0.609179	0.637201	0.62828	0.646938	0.673541	0.627781	0.618104	0.618601	0.649501	0.663678	0.661297	0.663665	0.66336	0.692893	0.734841	0.85734	1.06793	1.20212	1.34615	1.43928	1.46081	1.40601	1.2877	1.36797	1.29602	1.29195	1.37567	1.33356	1.30775	1.3091	1.34577	1.34549
0.789878	0.739048	0.669465	0.640314	0.581564	0.559801	0.526027	0.48058	0.462135	0.421755	0.415001	0.402071	0.407673	0.404539	0.381887	0.367492	0.373863	0.361609	0.369645	0.366002	0.349471	0.363548	0.332471	0.340311	0.321973	0.365324	0.329261	0.341615	0.364276	0.368194	0.358415	0.372183	0.41326	0.389093	0.393563	0.410301	0.390672	0.373053	0.374708	0.410259	0.404963	0.452722	0.485478	0.763941	1.11884	1.22873	1.21665	1.19383	1.23789	1.27491
	0.700007	0.712921	0.779791	0.819509	0.85477	0.832892	0.798092	0.842619	0.732207	0.80293	0.820942	0.83973	0.812119	0.769699	0.767737	0.787337	0.691109	0.697208	0.71007	0.703535	0.695862	0.657409	0.632128	0.650023	0.609412	0.618305	0.638152	0.630692	0.644574	0.64909	0.647482	0.617622	0.607203	0.632616	0.654529	0.632522	0.672824	0.69291	0.759381	0.85447	0.951307	0.980246	1.06018	0.980771	0.969318	0.906285	1.04663	1.02502	1.19901
					0.841748	0.820744	0.79452	0.752646	0.745353	0.745262	0.655412	0.634849	0.595835	0.648263	0.682997	0.597721	0.589741	0.61018	0.604402	0.657974	0.643989	0.622994	0.654329	0.65569	0.643606	0.563883	0.586835	0.560642	0.54723	0.585923	0.583814	0.553555	0.548315	0.557901	0.538521	0.50091	0.480431	0.512233	0.516756	0.479637	0.515256	0.668276	0.894844	0.968757	0.935521	0.981393	1.02202	1.10108	1.1959
[truncated: 25 more columns]

## Sheet: Abemaciclib_G1 (CDK2)
Time since mitogen stimulation (hr)
0.2	0.4	0.6	0.8	1	1.2	1.4	1.6	1.8	2	2.2	2.4	2.6	2.8	3	3.2	3.4	3.6	3.8	4	4.2	4.4	4.6	4.8	5	5.2	5.4	5.6	5.8	6	6.2	6.4	6.6	6.8	7	7.2	7.4	7.6	7.8	8	8.2	8.4	8.6	8.8	9	9.2	9.4	9.6	9.8	10
0.422231	0.437921	0.428152	0.43247	0.451974	0.41107	0.401407	0.392194	0.37995	0.380519	0.384116	0.316574	0.303503	0.289004	0.283721	0.275503	0.273423	0.257612	0.252192	0.266064	0.264814	0.273501	0.259163	0.252924	0.259696	0.273754	0.282684	0.272956	0.268332	0.269312	0.273682	0.266144	0.276206	0.262007	0.250699	0.266768	0.258007	0.251831	0.251961	0.253236	0.264575	0.260617	0.259606	0.246416	0.273356	0.269188	0.287749	0.294572	0.337188	0.388043
0.582166	0.557242	0.584067	0.506871	0.509763	0.505482	0.494484	0.479499	0.498367	0.500392	0.47082	0.457076	0.443885	0.421469	0.415812	0.388574	0.388429	0.383342	0.399232	0.39932	0.395234	0.38812	0.373759	0.36517	0.357179	0.370536	0.38309	0.395988	0.380081	0.409889	0.428557	0.416467	0.431319	0.429952	0.421865	0.44339	0.450283	0.469568	0.503879	0.518278	0.561397	0.602637	0.669774	0.713988	0.760511	0.80479	0.854856	0.854077	0.892222	0.932879
0.377188	0.374299	0.376835	0.401753	0.342038	0.33047	0.297627	0.283456	0.283312	0.272875	0.270557	0.272747	0.264066	0.252821	0.260858	0.245252	0.25021	0.229769	0.238275	0.241584	0.251539	0.234258	0.232061	0.248557	0.259291	0.269713	0.289141	0.314008	0.311931	0.331915	0.323539	0.309685	0.296047	0.287896	0.286513	0.296958	0.303213	0.329362	0.327815	0.321039	0.336489	0.347603	0.352837	0.394116	0.441014	0.4423	0.494332	0.492552	0.517817	0.550049
0.358486	0.32237	0.261998	0.2467	0.258468	0.26485	0.261146	0.272521	0.277613	0.272034	0.265539	0.266918	0.266841	0.249745	0.2522	0.237479	0.260327	0.257208	0.244151	0.241897	0.242736	0.214221	0.238833	0.22869	0.230037	0.227714	0.249339	0.297061	0.297626	0.309547	0.292068	0.301793	0.313643	0.317734	0.334207	0.330829	0.330717	0.332739	0.346753	0.344532	0.351629	0.298015	0.294296	0.275362	0.324778	0.338244	0.373808	0.387797	0.407462	0.436295
												0.497385	0.473275	0.453044	0.465864	0.463006	0.479518	0.468179	0.484235	0.469908	0.462335	0.45882	0.460033	0.44426	0.440116	0.435827	0.429885	0.419814	0.430003	0.434359	0.433693	0.459639	0.468366	0.493158	0.509941	0.538535	0.572334	0.594621	0.576729	0.60528	0.637403	0.611975	0.620533	0.659063	0.66787	0.713915	0.743926	0.771398	0.826345
0.571414	0.484712	0.52505	0.574218	0.50892	0.556702	0.545226	0.493215	0.45647	0.458433	0.431072	0.430368	0.446133	0.402878	0.411767	0.397709	0.354727	0.361641	0.365635	0.392093	0.374716	0.378353	0.367624	0.373141	0.367247	0.348685	0.332812	0.334267	0.322692	0.294978	0.295495	0.278375	0.283059	0.320802	0.326786	0.290582	0.302755	0.307967	0.325841	0.305345	0.296859	0.29681	0.29627	0.284986	0.28726	0.313017	0.3155	0.333626	0.366807	0.374281
0.572811	0.406423	0.403294	0.430504	0.435564	0.387734	0.391411	0.423923	0.421629	0.398729	0.428419	0.419806	0.415744	0.415666	0.459559	0.428793	0.432499	0.422458	0.420878	0.41285	0.409766	0.394511	0.394249	0.39137	0.381105	0.377613	0.330763	0.348723	0.310698	0.313374	0.316683	0.290732	0.288869	0.287543	0.270686	0.280692	0.273782	0.277555	0.290099	0.290922	0.272894	0.278434	0.290255	0.29979	0.306978	0.286875	0.312863	0.360803	0.421179	0.474824
0.536083	0.452796	0.447307	0.54017	0.546015	0.525467	0.531139	0.524842	0.505391	0.508006	0.449868	0.461522	0.426936	0.414553	0.410437	0.404022	0.409573	0.40453	0.392316	0.394043	0.389756	0.378443	0.352833	0.357747	0.331858	0.344088	0.308319	0.323612	0.30088	0.298092	0.310912	0.295616	0.267167	0.291465	0.289097	0.285382	0.310729	0.318687	0.326549	0.338347	0.342592	0.359096	0.366362	0.375897	0.370363	0.388734	0.39685	0.405391	0.40983	0.430475
0.548573	0.592854	0.598513	0.580234	0.554826	0.532	0.503651	0.495613	0.48818	0.488288	0.479106	0.487306	0.49896	0.482181	0.503125	0.485248	0.474908	0.48905	0.491591	0.462002	0.455789	0.428138	0.458197	0.44041	0.439309	0.437353	0.406048	0.404613	0.401816	0.381568	0.37688	0.38027	0.38455	0.362053	0.37416	0.3473	0.353209	0.341542	0.342855	0.325787	0.319269	0.319172	0.326129	0.325242	0.351316	0.391785	0.410972	0.450855	0.488936	0.56771
0.538216	0.549557	0.579567	0.608836	0.617076	0.65127	0.572257	0.562156	0.579062	0.56117	0.525814	0.505372	0.556214	0.545102	0.510992	0.510196	0.492453	0.504984	0.484928	0.503556	0.49887	0.48678	0.467628	0.482102	0.480484	0.420749	0.410367	0.397316	0.398139	0.39879	0.405308	0.398422	0.357635	0.334072	0.324254	0.337332	0.33718	0.331054	0.329271	0.315546	0.293375	0.298741	0.308498	0.328867	0.341024	0.347472	0.365845	0.358367	0.382654	0.412084
0.578546	0.6021	0.600512	0.609096	0.584571	0.577674	0.618283	0.650304	0.618506	0.571969	0.56096	0.545121	0.529208	0.494546	0.464233	0.46656	0.464353	0.437345	0.432967	0.449759	0.464027	0.4454	0.428552	0.425305	0.434003	0.410616	0.396992	0.405964	0.377786	0.404138	0.401079	0.40034	0.349706	0.345732	0.331961	0.362916	0.388683	0.397069	0.413148	0.396271	0.368864	0.390575	0.402707	0.384807	0.370328	0.377993	0.391841	0.420064	0.473938	0.540269
0.45061	0.482193	0.475936	0.518196	0.521971	0.49707	0.486729	0.428951	0.452721	0.412556	0.398209	0.417248	0.405553	0.423287	0.440717	0.410834	0.405847	0.425324	0.456392	0.474554	0.433318	0.452098	0.434558	0.484981	0.472511	0.436321	0.429341	0.423972	0.410884	0.37721	0.359054	0.337695	0.369607	0.445726	0.513335	0.554048	0.517148	0.433547	0.413485	0.427123	0.387932	0.39829	0.480879	0.540686	0.590436	0.639051	0.616648	0.666607	0.720749	0.805545
0.390884	0.427966	0.432085	0.48006	0.472137	0.458669	0.44096	0.422115	0.414978	0.397109	0.397803	0.374572	0.351681	0.347465	0.327401	0.343355	0.348944	0.349502	0.34439	0.342421	0.361582	0.337099	0.339677	0.344274	0.35161	0.339544	0.337403	0.333244	0.336586	0.337258	0.327439	0.33063	0.316096	0.305532	0.311514	0.30421	0.339312	0.319112	0.334575	0.338636	0.341056	0.360608	0.36758	0.382617	0.394743	0.408741	0.45678	0.463051	0.517023	0.524887
0.561002	0.53428	0.491062	0.488086	0.50522	0.475818	0.48255	0.488145	0.469095	0.518114	0.52631	0.507806	0.538672	0.54678	0.549142	0.566817	0.566299	0.55516	0.557082	0.548555	0.505906	0.516843	0.517179	0.533384	0.51109	0.481773	0.49039	0.470587	0.470204	0.447473	0.428293	0.41682	0.409742	0.405834	0.417227	0.38475	0.383944	0.363951	0.361021	0.34579	0.347648	0.357059	0.360889	0.376056	0.384165	0.405139	0.420862	0.440668	0.464342	0.499229
0.495932	0.543804	0.512999	0.52674	0.500078	0.486397	0.473699	0.477082	0.454993	0.427403	0.443425	0.429456	0.439783	0.450802	0.428233	0.432434	0.45529	0.441394	0.425221	0.434875	0.428246	0.433558	0.429066	0.42894	0.403428	0.399011	0.367165	0.346206	0.302851	0.288398	0.281424	0.289462	0.276302	0.278397	0.2783	0.281563	0.307104	0.311598	0.348954	0.3714	0.404949	0.442021	0.487316	0.614743	0.687794	0.715229	0.774506	0.805575	0.784398	0.83151
0.585816	0.622268	0.637913	0.589772	0.532838	0.548862	0.502551	0.486295	0.446356	0.415991	0.405562	0.409262	0.390677	0.381053	0.383609	0.369139	0.3763	0.375847	0.37463	0.39911	0.376097	0.406567	0.395302	0.401986	0.375906	0.364952	0.387502	0.367688	0.34973	0.345688	0.325972	0.336426	0.333848	0.32613	0.325005	0.326498	0.327294	0.321458	0.328208	0.334271	0.344969	0.352339	0.392337	0.400114	0.437763	0.484617	0.526116	0.563873	0.606877	0.616255
																	0.643114	0.677729	0.601474	0.576832	0.516867	0.454654	0.429295	0.398356	0.404523	0.427563	0.424458	0.397196	0.380195	0.374934	0.388313	0.37977	0.375628	0.367037	0.372267	0.365431	0.387177	0.40976	0.398033	0.415416	0.431934	0.455235	0.45358	0.485523	0.51618	0.577451	0.632113	0.684208	0.725556
0.492644	0.481202	0.456503	0.451939	0.460122	0.443942	0.414488	0.428207	0.429079	0.435117	0.428054	0.42808	0.431201	0.425618	0.435502	0.415361	0.429282	0.436263	0.424765	0.404517	0.424647	0.408951	0.43794	0.432379	0.441824	0.443788	0.446575	0.435257	0.431644	0.428731	0.424645	0.423948	0.407447	0.382863	0.370619	0.353131	0.342808	0.350467	0.377441	0.366732	0.374368	0.394091	0.413616	0.434984	0.456713	0.479159	0.490569	0.525132	0.557998	0.566284
0.440011	0.44113	0.424053	0.431176	0.41531	0.41163	0.424528	0.425738	0.427588	0.42758	0.41564	0.417873	0.425949	0.423206	0.415373	0.404802	0.414823	0.433595	0.415209	0.412672	0.420283	0.40364	0.41083	0.40701	0.405904	0.396959	0.40522	0.4033	0.388621	0.396298	0.385939	0.405735	0.403977	0.431793	0.445786	0.451378	0.468357	0.528968	0.586214	0.603022	0.678548	0.705284	0.768338	0.787839	0.822504	0.807249	0.843897	0.872084	0.894621	0.934455
0.445746	0.476635	0.462744	0.450597	0.450676	0.421719	0.416603	0.405646	0.39259	0.393447	0.374601	0.351012	0.357953	0.357817	0.376317	0.371756	0.381622	0.409361	0.405263	0.415432	0.382271	0.387699	0.401391	0.411594	0.376666	0.392255	0.377968	0.351447	0.38306	0.400617	0.396186	0.401013	0.397124	0.399788	0.413737	0.431195	0.437291	0.445054	0.420546	0.369836	0.338581	0.337204	0.345066	0.366644	0.333959	0.361738	0.381425	0.401944	0.40168	0.431953
0.419424	0.471841	0.474254	0.443596	0.466394	0.504527	0.464905	0.481858	0.480864	0.496701	0.507196	0.551305	0.521349	0.541266	0.502645	0.484652	0.483264	0.44641	0.44732	0.451284	0.441282	0.439382	0.449415	0.428243	0.395714	0.399279	0.371227	0.379848	0.393979	0.374446	0.34305	0.347207	0.315907	0.351173	0.362828	0.387074	0.392929	0.38247	0.377162	0.375334	0.377768	0.377035	0.43704	0.482138	0.484805	0.516294	0.547218	0.542055	0.57313	0.623265
0.381629	0.41287	0.414224	0.402593	0.400748	0.380574	0.403358	0.418352	0.460528	0.44857	0.451159	0.435132	0.431015	0.407159	0.403618	0.396676	0.399372	0.405276	0.417356	0.414185	0.399146	0.406191	0.39395	0.398244	0.384039	0.377786	0.378515	0.378502	0.378716	0.375931	0.361734	0.335922	0.33594	0.346514	0.352249	0.354039	0.345446	0.361441	0.365449	0.371752	0.361652	0.333034	0.319032	0.346901	0.361185	0.35763	0.393202	0.449453	0.49599	0.538282
0.538377	0.536742	0.534564	0.558808	0.530176	0.531447	0.509121	0.509297	0.495722	0.49794	0.505514	0.459011	0.487052	0.490238	0.474672	0.489718	0.505724	0.514847	0.523734	0.52496	0.524838	0.497599	0.525247	0.529825	0.530779	0.508881	0.490191	0.489058	0.466844	0.445126	0.426333	0.390478	0.396692	0.388984	0.400398	0.366537	0.383834	0.394002	0.408536	0.400444	0.371686	0.419037	0.405449	0.435859	0.473565	0.464182	0.453301	0.509496	0.555769	0.585507
0.574889	0.575154	0.551373	0.576056	0.52775	0.530901	0.521519	0.516546	0.494591	0.495135	0.477731	0.476597	0.488733	0.497539	0.485751	0.48751	0.453542	0.45815	0.456392	0.444665	0.454727	0.479164	0.489059	0.476119	0.473189	0.459217	0.444237	0.431162	0.435206	0.419895	0.424703	0.416935	0.423474	0.416107	0.430451	0.420963	0.429091	0.407418	0.399837	0.390112	0.383155	0.380422	0.377772	0.372987	0.38373	0.385885	0.393862	0.426186	0.457323	0.482076
															0.386244	0.384301	0.39287	0.389889	0.37267	0.394442	0.406181	0.389848	0.386165	0.404053	0.394349	0.401619	0.395079	0.383628	0.381457	0.360014	0.355316	0.364022	0.35879	0.373617	0.372126	0.367522	0.386992	0.395417	0.415785	0.445495	0.504449	0.575521	0.652479	0.685644	0.745698	0.755507	0.80757	0.817549	0.805012
0.590212	0.60111	0.554857	0.60302	0.609293	0.571514	0.569671	0.537113	0.503263	0.484715	0.482014	0.488977	0.47884	0.465835	0.480039	0.467181	0.477224	0.451835	0.469078	0.464914	0.481321	0.473075	0.471379	0.450917	0.428665	0.430955	0.433739	0.425273	0.407721	0.396197	0.414205	0.385566	0.41508	0.394439	0.393986	0.388884	0.360731	0.3675	0.384521	0.369606	0.371826	0.38364	0.384853	0.384837	0.39245	0.447143	0.477747	0.514273	0.558524	0.622885
0.308457	0.291085	0.255945	0.204398	0.227941	0.267001	0.291395	0.296584	0.274559	0.270904	0.28799	0.249799	0.255608	0.255124	0.250819	0.254974	0.242182	0.261054	0.270796	0.264119	0.262526	0.251381	0.242397	0.239184	0.221275	0.233331	0.207403	0.220149	0.228404	0.222496	0.237254	0.242242	0.234418	0.22513	0.242775	0.257908	0.279135	0.28283	0.327498	0.384429	0.444816	0.488826	0.542629	0.592196	0.62666	0.659663	0.677501	0.713895	0.712975	0.701687
0.348761	0.374359	0.382344	0.393014	0.381841	0.378617	0.373673	0.355746	0.357711	0.346254	0.298537	0.289822	0.284458	0.28709	0.274299	0.264863	0.269301	0.254844	0.261137	0.281828	0.279334	0.287182	0.318095	0.317135	0.325541	0.32182	0.330798	0.336741	0.336986	0.338327	0.355229	0.333475	0.329764	0.321902	0.320452	0.311828	0.308093	0.297396	0.286714	0.278322	0.296568	0.306181	0.326742	0.324957	0.35148	0.372842	0.395927	0.43067	0.485015	0.539224
															0.575849	0.550869	0.524595	0.520668	0.502646	0.475626	0.488976	0.465545	0.421233	0.416211	0.434182	0.445889	0.446937	0.458229	0.430236	0.418841	0.413751	0.41221	0.422569	0.42745	0.416832	0.416457	0.410679	0.406484	0.434979	0.454909	0.508965	0.555665	0.571799	0.609306	0.638937	0.672406	0.701251	0.715823	0.761531
																	0.59802	0.566533	0.557685	0.531051	0.494799	0.4826	0.483532	0.499394	0.498356	0.483558	0.497197	0.487907	0.493731	0.480609	0.447509	0.449146	0.435231	0.423864	0.488855	0.502119	0.511752	0.578316	0.526333	0.573064	0.582059	0.591136	0.587557	0.615813	0.65736	0.723022	0.745107	0.766379	0.743535
																								0.379078	0.365891	0.34558	0.347905	0.335193	0.340725	0.336514	0.335094	0.309186	0.284719	0.275978	0.276355	0.25526	0.264384	0.269464	0.270496	0.272269	0.27215	0.282875	0.302728	0.352178	0.389738	0.430251	0.49166	0.545919	0.60342
0.454337	0.458844	0.4755	0.492379	0.47239	0.460803	0.4506	0.429274	0.451139	0.400257	0.419385	0.44232	0.449766	0.426381	0.400075	0.354827	0.355835	0.380477	0.377242	0.39515	0.415846	0.411382	0.418751	0.401695	0.412434	0.401443	0.416709	0.393192	0.395013	0.390768	0.40337	0.395401	0.417688	0.411633	0.383515	0.361964	0.38983	0.371511	0.363301	0.372431	0.37248	0.37688	0.399161	0.427427	0.465596	0.499041	0.579229	0.565713	0.58032	0.648024
0.404643	0.423003	0.412863	0.409392	0.385456	0.360531	0.367725	0.339739	0.328641	0.319541	0.322944	0.310458	0.318071	0.315379	0.311057	0.313686	0.308999	0.300801	0.316379	0.306463	0.301701	0.300016	0.291956	0.292978	0.288237	0.297356	0.30259	0.301294	0.307485	0.324128	0.342329	0.332252	0.315989	0.328912	0.339015	0.373729	0.387022	0.386434	0.400518	0.422322	0.41993	0.436167	0.464658	0.494115	0.555111	0.65911	0.74115	0.826943	0.869985	0.902493
0.578401	0.569756	0.558487	0.567088	0.56761	0.586306	0.606549	0.602919	0.588583	0.597501	0.566757	0.569288	0.525273	0.504953	0.466728	0.432085	0.407557	0.396106	0.406411	0.41912	0.404677	0.394016	0.386889	0.404841	0.392149	0.39884	0.407227	0.39117	0.380427	0.370443	0.382068	0.382545	0.385681	0.388381	0.40246	0.405897	0.402304	0.402162	0.442265	0.42093	0.427804	0.413288	0.4426	0.467725	0.496629	0.5335	0.585238	0.638057	0.745178	0.852282
0.597732	0.666724	0.635572	0.64027	0.634438	0.618122	0.642831	0.605849	0.556483	0.579678	0.568588	0.525644	0.53398	0.529778	0.502715	0.521566	0.512648	0.485421	0.493508	0.497414	0.476505	0.50106	0.476786	0.466586	0.463503	0.45768	0.43714	0.432719	0.416131	0.415998	0.404454	0.408448	0.41035	0.416902	0.401411	0.402198	0.413891	0.397299	0.400392	0.405915	0.392205	0.388529	0.383951	0.40025	0.400119	0.393517	0.401199	0.422211	0.434687	0.468776
0.506859	0.481571	0.481276	0.462362	0.430717	0.443311	0.483287	0.469258	0.491268	0.483127	0.46505	0.462669	0.438355	0.453977	0.465128	0.459053	0.447851	0.463331	0.459753	0.472483	0.442796	0.448831	0.438056	0.455471	0.454696	0.444008	0.437588	0.436017	0.43229	0.419824	0.406439	0.415221	0.41417	0.427489	0.443317	0.441012	0.449995	0.467917	0.50505	0.560191	0.594749	0.661034	0.715385	0.761242	0.778933	0.786379	0.812487	0.82877	0.849645	0.858891
0.581815	0.581574	0.557292	0.54278	0.53033	0.5142	0.516748	0.498741	0.513789	0.522621	0.516348	0.501535	0.500036	0.486673	0.461273	0.470799	0.466654	0.483157	0.489326	0.498374	0.487056	0.488197	0.480174	0.481976	0.490649	0.484711	0.477191	0.45879	0.46006	0.442455	0.420921	0.400276	0.372599	0.343368	0.304094	0.31985	0.331236	0.327057	0.332731	0.341781	0.35163	0.344432	0.346123	0.338936	0.362142	0.353602	0.374777	0.383	0.379467	0.417738
0.529482	0.539684	0.542814	0.575126	0.561341	0.547422	0.578786	0.583626	0.541149	0.528675	0.510975	0.510189	0.473562	0.473587	0.428919	0.448938	0.424948	0.423798	0.436208	0.415745	0.420892	0.410818	0.373341	0.360577	0.321909	0.345647	0.326883	0.33538	0.326723	0.333954	0.332721	0.313068	0.320889	0.294152	0.317818	0.306265	0.322039	0.321451	0.331717	0.359576	0.34551	0.331871	0.322477	0.348344	0.338231	0.344182	0.382526	0.416049	0.4542	0.507813
0.561263	0.507496	0.488825	0.447171	0.432403	0.445039	0.472836	0.47411	0.478675	0.523801	0.460839	0.482131	0.464753	0.475892	0.486901	0.447253	0.459112	0.449661	0.435392	0.442252	0.430936	0.431687	0.43605	0.420978	0.401801	0.379284	0.375114	0.366565	0.395739	0.407014	0.401965	0.404582	0.401475	0.372892	0.394102	0.384218	0.378744	0.391964	0.394743	0.397305	0.3926	0.39996	0.421858	0.415455	0.418781	0.432297	0.450514	0.506169	0.565265	0.619596
0.475263	0.480698	0.474256	0.510003	0.484888	0.529307	0.539664	0.528361	0.47339	0.461443	0.435659	0.413945	0.43526	0.442215	0.433827	0.442977	0.430856	0.414124	0.427087	0.444381	0.448748	0.454011	0.44746	0.441247	0.435716	0.43817	0.412697	0.395158	0.418065	0.423562	0.440593	0.43229	0.450148	0.423402	0.4142	0.420108	0.428424	0.429339	0.45071	0.458555	0.442018	0.433385	0.46995	0.491896	0.516269	0.558498	0.608511	0.662778	0.750035	0.815439
0.533544	0.517074	0.490362	0.521044	0.542273	0.528915	0.510026	0.498847	0.49162	0.440191	0.45846	0.436685	0.412286	0.417741	0.409036	0.398599	0.39578	0.373177	0.357248	0.358465	0.360402	0.34587	0.344132	0.322484	0.344094	0.326648	0.348726	0.351376	0.327694	0.330498	0.37086	0.378948	0.357492	0.360385	0.371928	0.383688	0.412478	0.41763	0.424787	0.465891	0.489898	0.507459	0.522568	0.553087	0.596619	0.630621	0.6864	0.756018	0.815365	0.847862
0.465918	0.436065	0.422663	0.432378	0.409565	0.414904	0.41031	0.390414	0.384152	0.367292	0.359768	0.362863	0.343897	0.339819	0.332193	0.32871	0.327073	0.324887	0.314332	0.310569	0.302426	0.3298	0.329853	0.339446	0.324141	0.324744	0.333021	0.31943	0.338655	0.331398	0.332382	0.339504	0.337752	0.338445	0.343237	0.338107	0.356679	0.350323	0.369312	0.359703	0.354429	0.343962	0.348621	0.37175	0.396242	0.411498	0.462111	0.503395	0.53647	0.547251
0.44542	0.445979	0.438119	0.43979	0.392649	0.410718	0.399269	0.37542	0.340786	0.3206	0.311415	0.305532	0.291844	0.305381	0.3519	0.345443	0.34124	0.345675	0.36138	0.36549	0.32611	0.30664	0.305295	0.271235	0.277918	0.280608	0.281319	0.282672	0.29304	0.297099	0.299256	0.29969	0.315522	0.302086	0.289166	0.286985	0.288213	0.278512	0.278497	0.277459	0.277982	0.274989	0.297963	0.301774	0.300507	0.29694	0.296833	0.322706	0.363035	0.408787
	0.561896	0.559461	0.54738	0.517538	0.515369	0.538708	0.541056	0.505199	0.52094	0.523709	0.562318	0.496252	0.512278	0.52117	0.531333	0.473989	0.479014	0.458011	0.449692	0.442252	0.447057	0.440107	0.487945	0.454859	0.454371	0.443211	0.42964	0.41323	0.408972	0.398492	0.419321	0.399092	0.376257	0.398516	0.386003	0.385204	0.36513	0.372661	0.372028	0.376393	0.351442	0.356999	0.342011	0.316073	0.332388	0.356128	0.386832	0.412029	0.469405
0.556189	0.568084	0.542233	0.539688	0.506537	0.54227	0.505256	0.486586	0.482462	0.469441	0.446619	0.391896	0.390423	0.37063	0.400945	0.364726	0.332541	0.320419	0.322883	0.319474	0.32385	0.326825	0.356741	0.332624	0.338386	0.338415	0.353443	0.328048	0.335337	0.34449	0.337091	0.326954	0.345103	0.325463	0.333508	0.3177	0.333137	0.337574	0.344559	0.353475	0.356495	0.366119	0.364791	0.380556	0.381605	0.396605	0.41814	0.477997	0.539462	0.590847
0.46625	0.468565	0.437013	0.454949	0.447267	0.452805	0.459378	0.431917	0.417334	0.392276	0.40236	0.380207	0.385007	0.39097	0.402404	0.411324	0.400125	0.38653	0.380863	0.378494	0.376677	0.351108	0.359013	0.339631	0.343451	0.320946	0.314928	0.329824	0.309764	0.292243	0.305195	0.300615	0.300426	0.300937	0.294699	0.279783	0.288153	0.277363	0.281605	0.284996	0.288122	0.290142	0.300154	0.323594	0.310685	0.322196	0.348641	0.40648	0.448475	0.551136
0.48201	0.500258	0.472038	0.505988	0.596294	0.642431	0.598585	0.575323	0.541272	0.55929	0.527796	0.538168	0.533445	0.491329	0.485407	0.484829	0.469662	0.446167	0.451487	0.456318	0.469862	0.452546	0.483611	0.449175	0.453736	0.424515	0.415361	0.409903	0.393454	0.387822	0.376218	0.369795	0.365579	0.399548	0.429794	0.412227	0.427453	0.389395	0.406886	0.413557	0.42839	0.419649	0.413482	0.416083	0.39818	0.410503	0.431816	0.448344	0.44211	0.458803
0.521512	0.528621	0.544104	0.529678	0.520294	0.5564	0.524047	0.528143	0.552126	0.535731	0.506628	0.506405	0.517821	0.544659	0.568992	0.563106	0.567671	0.554494	0.539805	0.50773	0.539291	0.491148	0.520146	0.502027	0.486501	0.454321	0.445849	0.452083	0.439028	0.422646	0.410427	0.398725	0.379819	0.347985	0.3566	0.371489	0.385093	0.399458	0.381699	0.397661	0.399582	0.42213	0.464614	0.489774	0.52792	0.578587	0.656407	0.707542	0.767118	0.852119
0.512101	0.496948	0.471067	0.472104	0.478523	0.505648	0.489502	0.52624	0.521107	0.505043	0.474398	0.486254	0.478405	0.490194	0.475043	0.464602	0.458948	0.425061	0.423659	0.423374	0.435653	0.426905	0.418842	0.416658	0.425765	0.445703	0.468099	0.43388	0.409331	0.415658	0.420679	0.404165	0.384145	0.376703	0.369569	0.369143	0.367657	0.376234	0.372242	0.389954	0.394161	0.373918	0.374299	0.390007	0.411861	0.432229	0.450499	0.497793	0.576237	0.635243
0.533313	0.544221	0.480882	0.47016	0.499867	0.499306	0.493652	0.479984	0.463448	0.431213	0.415722	0.391811	0.376657	0.369977	0.382421	0.367178	0.387234	0.397274	0.396278	0.405647	0.407725	0.396171	0.381563	0.39458	0.396403	0.4003	0.376527	0.37438	0.380294	0.368146	0.367228	0.346218	0.358235	0.351847	0.367312	0.398751	0.418469	0.428291	0.44364	0.4726	0.502929	0.533534	0.575492	0.632173	0.692115	0.713599	0.780114	0.818618	0.825068	0.897105
0.593646	0.573854	0.560452	0.525479	0.532549	0.518096	0.511684	0.500997	0.453352	0.44857	0.417384	0.410637	0.400666	0.393474	0.391271	0.410019	0.403133	0.38832	0.37975	0.372075	0.36627	0.373566	0.366978	0.372192	0.369289	0.36541	0.364677	0.359427	0.354944	0.33424	0.32081	0.310907	0.319462	0.328041	0.33433	0.340079	0.359895	0.373909	0.383487	0.405641	0.423692	0.465179	0.517589	0.551459	0.5869	0.582131	0.645961	0.700231	0.785435	0.81712
0.55392	0.56186	0.54143	0.563494	0.556458	0.535163	0.525037	0.507421	0.499589	0.500364	0.473525	0.456033	0.465446	0.458008	0.462732	0.457907	0.431235	0.435697	0.407641	0.39872	0.413122	0.407769	0.406787	0.399046	0.400635	0.379364	0.378836	0.369822	0.37651	0.378451	0.384662	0.358495	0.362543	0.351532	0.348734	0.331508	0.33604	0.328466	0.325527	0.341539	0.366943	0.391888	0.415396	0.445041	0.48301	0.542121	0.595855	0.652667	0.69653	0.71221
0.575279	0.596423	0.590609	0.583693	0.623432	0.581017	0.54101	0.531975	0.468706	0.441869	0.370702	0.376247	0.333592	0.306911	0.304737	0.280002	0.29334	0.306663	0.337731	0.347123	0.336178	0.330335	0.33197	0.336331	0.336678	0.335511	0.341054	0.330049	0.322284	0.326222	0.324585	0.327375	0.349424	0.338895	0.314303	0.31585	0.319642	0.326853	0.312319	0.341422	0.326676	0.360492	0.378242	0.405564	0.417059	0.457488	0.526063	0.618851	0.70055	0.743896
0.59892	0.619778	0.629568	0.583289	0.600334	0.584142	0.524343	0.545176	0.51579	0.50022	0.529878	0.515419	0.492014	0.46735	0.459629	0.460908	0.460383	0.447024	0.447152	0.451636	0.447736	0.472471	0.500794	0.514097	0.5077	0.545453	0.55248	0.554532	0.52939	0.509681	0.495728	0.48256	0.479968	0.483948	0.458726	0.441445	0.440942	0.43589	0.446044	0.462767	0.491574	0.488759	0.461054	0.449379	0.460156	0.472475	0.45472	0.461849	0.45762	0.495768
0.570129	0.558114	0.553715	0.551386	0.543252	0.525123	0.506054	0.514538	0.52598	0.510428	0.486246	0.494107	0.473347	0.454206	0.474435	0.473665	0.460051	0.459618	0.453464	0.448531	0.452479	0.437043	0.409417	0.401764	0.405033	0.393587	0.379814	0.366362	0.352454	0.357746	0.343392	0.341855	0.336942	0.335883	0.335313	0.356258	0.356028	0.361756	0.353927	0.378908	0.372682	0.36866	0.3689	0.372862	0.38675	0.423546	0.441056	0.449407	0.477463	0.492533
0.362178	0.404606	0.417301	0.370154	0.420436	0.422123	0.453973	0.503006	0.494639	0.489034	0.469461	0.455887	0.481049	0.453324	0.459743	0.454358	0.449824	0.450969	0.424221	0.435623	0.411282	0.3766	0.353401	0.350326	0.349547	0.298882	0.31401	0.330273	0.308039	0.326728	0.340937	0.319729	0.325614	0.337818	0.35601	0.364844	0.385217	0.405459	0.422945	0.492934	0.522059	0.573676	0.628056	0.674796	0.70585	0.727335	0.763281	0.825458	0.791584	0.831957
			0.413992	0.436717	0.421845	0.417339	0.416881	0.434376	0.418199	0.437569	0.453977	0.430284	0.425012	0.425492	0.42454	0.425441	0.446708	0.442896	0.423559	0.44067	0.399596	0.40474	0.401798	0.392089	0.383381	0.370947	0.387621	0.377164	0.39237	0.388626	0.388962	0.40222	0.399038	0.425065	0.418778	0.409059	0.38835	0.395011	0.392739	0.38464	0.391808	0.411545	0.431577	0.471578	0.523272	0.601763	0.693414	0.761977	0.844928
																						0.417582	0.438499	0.468044	0.464617	0.466741	0.456822	0.448022	0.447539	0.439192	0.451391	0.452783	0.44004	0.432937	0.438383	0.430464	0.416588	0.445761	0.445101	0.433904	0.439419	0.447056	0.450009	0.454809	0.462352	0.463926	0.483392	0.524257	0.572951
0.58392	0.588492	0.593646	0.608402	0.628416	0.646869	0.614736	0.593494	0.546459	0.518639	0.553395	0.525745	0.500592	0.522298	0.509101	0.485708	0.447024	0.436889	0.42692	0.423142	0.4295	0.445384	0.435249	0.429964	0.4089	0.404566	0.385555	0.383168	0.38111	0.375329	0.378641	0.394306	0.369992	0.376935	0.385085	0.370742	0.364141	0.372981	0.364762	0.384141	0.367674	0.383562	0.359956	0.363935	0.372486	0.384959	0.388012	0.399656	0.392927	0.413681
0.414306	0.387779	0.373505	0.404019	0.402617	0.394294	0.411485	0.394906	0.397179	0.405143	0.38518	0.378157	0.40485	0.409133	0.432912	0.437444	0.458576	0.472007	0.47199	0.456533	0.461074	0.43399	0.416764	0.418758	0.414257	0.414538	0.395824	0.409931	0.426836	0.421443	0.408417	0.413552	0.407753	0.396482	0.392597	0.395834	0.395487	0.390822	0.376165	0.357727	0.375388	0.362432	0.370442	0.389813	0.382099	0.373324	0.364876	0.364627	0.377892	0.424724
0.556906	0.51694	0.497017	0.459652	0.449391	0.439107	0.447382	0.405289	0.378327	0.380925	0.387012	0.367204	0.388115	0.406932	0.414154	0.417561	0.45646	0.45208	0.438578	0.434383	0.420531	0.421242	0.374678	0.388481	0.403867	0.422745	0.352813	0.361903	0.335152	0.364822	0.358303	0.36956	0.324461	0.357679	0.347119	0.353429	0.352308	0.363729	0.375568	0.378336	0.393737	0.395078	0.414642	0.421439	0.436295	0.462165	0.473084	0.48267	0.480481	0.493592
0.575977	0.562185	0.548392	0.51544	0.527588	0.520224	0.488847	0.485357	0.458622	0.450237	0.452426	0.428307	0.427375	0.406878	0.430174	0.431532	0.401802	0.383483	0.379626	0.368817	0.373497	0.386545	0.405068	0.398931	0.414005	0.395827	0.36354	0.357479	0.349294	0.320522	0.322489	0.341262	0.323916	0.321793	0.324175	0.320144	0.33938	0.354525	0.352919	0.37581	0.406052	0.448343	0.438766	0.436066	0.447102	0.461454	0.458039	0.492694	0.500881	0.513587
0.473053	0.443863	0.448472	0.430804	0.41061	0.419419	0.415608	0.393743	0.394948	0.413646	0.411327	0.400056	0.393108	0.367818	0.37782	0.373211	0.355055	0.348331	0.350857	0.336	0.330923	0.348601	0.341256	0.344313	0.364163	0.356788	0.366044	0.345741	0.358598	0.354234	0.349584	0.352871	0.344515	0.340632	0.350277	0.329849	0.326943	0.333205	0.304868	0.320347	0.315775	0.314623	0.314036	0.313597	0.320584	0.34483	0.377906	0.43385	0.491998	0.597084
0.559614	0.601894	0.604353	0.609354	0.57012	0.532072	0.539821	0.50892	0.493927	0.466871	0.471065	0.449884	0.444772	0.432918	0.444059	0.424218	0.424033	0.41756	0.419619	0.427119	0.414385	0.401016	0.401635	0.406969	0.423995	0.418538	0.413842	0.422527	0.421214	0.429786	0.420046	0.44865	0.435013	0.418426	0.412922	0.433705	0.418974	0.432805	0.435381	0.443683	0.450248	0.468304	0.487051	0.564801	0.62484	0.654969	0.707939	0.7159	0.76828	0.803782
0.577518	0.62998	0.640353	0.633055	0.594617	0.577613	0.553681	0.522596	0.509205	0.487083	0.470795	0.465476	0.442278	0.429174	0.449017	0.427233	0.424069	0.426687	0.41759	0.405684	0.40204	0.386016	0.37137	0.381522	0.374087	0.387902	0.370526	0.372908	0.373854	0.380575	0.392618	0.401932	0.388919	0.406692	0.427356	0.438027	0.457167	0.464464	0.487356	0.488333	0.502564	0.525928	0.537908	0.54751	0.611619	0.645522	0.634539	0.697657	0.714607	0.743382
0.585223	0.573629	0.577994	0.590923	0.556704	0.604715	0.590372	0.561018	0.549411	0.534617	0.534064	0.501119	0.522052	0.509369	0.515657	0.481387	0.520596	0.497691	0.493032	0.521005	0.5167	0.501937	0.513492	0.50685	0.4827	0.48179	0.457514	0.439935	0.436062	0.40529	0.403426	0.401854	0.394489	0.392417	0.406487	0.395655	0.40522	0.43583	0.419924	0.426975	0.425877	0.433683	0.417778	0.431409	0.410126	0.425073	0.415268	0.450436	0.479911	0.501723
		0.690459	0.650393	0.631877	0.600164	0.591449	0.613724	0.57491	0.58371	0.603993	0.575995	0.59497	0.615726	0.572213	0.563005	0.543976	0.519877	0.507887	0.509563	0.510291	0.4991	0.47686	0.476982	0.482757	0.456157	0.474214	0.450402	0.450554	0.460736	0.474797	0.48704	0.47654	0.496824	0.517168	0.528108	0.527982	0.56826	0.565596	0.605193	0.605144	0.623824	0.65838	0.671486	0.699282	0.667966	0.715966	0.798029	0.780567	0.825286
0.585762	0.605529	0.620141	0.600015	0.564699	0.540347	0.528803	0.526786	0.520223	0.537708	0.512946	0.512965	0.496607	0.474357	0.465307	0.437457	0.473116	0.48205	0.494938	0.482464	0.441413	0.42103	0.388527	0.405652	0.392764	0.370154	0.383034	0.385699	0.365532	0.370391	0.359376	0.363519	0.340482	0.350048	0.340584	0.325498	0.340481	0.328388	0.324219	0.321512	0.330357	0.3434	0.360494	0.370395	0.357995	0.362081	0.373276	0.397087	0.409402	0.463601
0.553407	0.564416	0.547736	0.539903	0.521954	0.523698	0.507878	0.481615	0.485189	0.470055	0.467841	0.435009	0.447424	0.427899	0.447187	0.445805	0.432706	0.432231	0.441765	0.430998	0.436369	0.430983	0.436849	0.415745	0.410208	0.402334	0.421102	0.418604	0.407957	0.422879	0.415748	0.424247	0.417578	0.433866	0.444213	0.411752	0.422445	0.443482	0.453507	0.462163	0.511622	0.509259	0.533703	0.538467	0.573028	0.608912	0.64305	0.667998	0.713696	0.750843
0.589253	0.595536	0.569858	0.615624	0.620139	0.6076	0.575169	0.586393	0.563242	0.560134	0.536147	0.509342	0.512431	0.509906	0.474281	0.489283	0.487647	0.496066	0.495934	0.493118	0.493926	0.488488	0.465067	0.482518	0.472087	0.471112	0.477484	0.466185	0.443617	0.424929	0.4297	0.420284	0.421418	0.447084	0.456354	0.435534	0.444439	0.438054	0.443809	0.450013	0.474075	0.482332	0.475782	0.511823	0.533409	0.586354	0.643131	0.684836	0.732855	0.786576
						0.613109	0.593978	0.579179	0.580456	0.53295	0.556569	0.552625	0.538485	0.542424	0.533401	0.525745	0.512896	0.483162	0.470038	0.447358	0.426441	0.418299	0.426944	0.415895	0.39694	0.401608	0.381143	0.37872	0.373672	0.377814	0.38077	0.376621	0.38778	0.394461	0.387546	0.383028	0.382013	0.387526	0.383694	0.380207	0.401804	0.413835	0.433398	0.479628	0.525846	0.584551	0.622715	0.635632	0.737519
																	0.519483	0.569963	0.562956	0.572879	0.568427	0.582452	0.594048	0.567719	0.550654	0.549658	0.581081	0.575318	0.578317	0.576315	0.560437	0.552308	0.540318	0.515587	0.510388	0.50656	0.506996	0.488549	0.470583	0.463399	0.47019	0.463814	0.459171	0.438679	0.451691	0.461854	0.458364	0.48963	0.496149
0.441208	0.43476	0.485556	0.514187	0.544414	0.53906	0.504266	0.500991	0.473108	0.449947	0.42479	0.40225	0.413565	0.398395	0.353026	0.346518	0.348594	0.353642	0.359048	0.353791	0.352584	0.356837	0.351119	0.356632	0.351967	0.356867	0.369567	0.352038	0.350377	0.352342	0.355452	0.373651	0.363724	0.356507	0.383759	0.401287	0.401062	0.402569	0.426761	0.454086	0.516142	0.587157	0.640476	0.716902	0.726558	0.696475	0.736253	0.84781	0.929006	0.988299
0.476489	0.478102	0.481154	0.539374	0.617079	0.551107	0.69473	0.597076	0.524234	0.506999	0.518972	0.504912	0.484853	0.474841	0.439714	0.428588	0.438308	0.419961	0.445337	0.438292	0.399102	0.387483	0.395181	0.399941	0.413581	0.419043	0.420444	0.397293	0.407907	0.394007	0.397252	0.405641	0.399731	0.406748	0.426145	0.403279	0.38155	0.392973	0.381484	0.385302	0.400706	0.417402	0.460526	0.509579	0.576235	0.634695	0.677206	0.683458	0.677179	0.702508
0.593892	0.636372	0.600606	0.552111	0.524336	0.515643	0.500959	0.472463	0.45941	0.425801	0.390617	0.385102	0.357449	0.349736	0.34583	0.365324	0.375665	0.370371	0.374512	0.387794	0.380618	0.383021	0.373266	0.358523	0.350382	0.343894	0.339205	0.335822	0.339982	0.321964	0.326741	0.322249	0.339085	0.334203	0.344873	0.343742	0.353901	0.341408	0.332437	0.340053	0.333986	0.328586	0.323722	0.324108	0.324181	0.343709	0.334458	0.340855	0.359942	0.368512
	0.650107	0.659162	0.682244	0.652707	0.60591	0.58093	0.571659	0.51502	0.477281	0.480527	0.471373	0.482497	0.493068	0.50202	0.471467	0.45419	0.468018	0.44925	0.460942	0.434586	0.412972	0.43172	0.435259	0.421332	0.425703	0.416862	0.407017	0.409875	0.4071	0.405112	0.402543	0.415283	0.39464	0.395776	0.39058	0.389517	0.384324	0.386503	0.382302	0.386668	0.390975	0.406477	0.413392	0.424321	0.437457	0.45067	0.454171	0.479717	0.500843
				0.679941	0.691215	0.697989	0.703024	0.706463	0.662482	0.659787	0.627179	0.605223	0.530516	0.520494	0.509107	0.501593	0.46853	0.458209	0.454379	0.450633	0.474611	0.468551	0.511242	0.46352	0.456363	0.461551	0.465068	0.461436	0.465993	0.434386	0.449599	0.437195	0.418705	0.41043	0.385296	0.381951	0.361557	0.361605	0.354168	0.354652	0.35514	0.350762	0.364034	0.385303	0.399653	0.415851	0.422137	0.459006	0.502236
0.570685	0.562232	0.552355	0.543704	0.553963	0.51396	0.48997	0.47772	0.466229	0.451294	0.456005	0.442396	0.427284	0.424938	0.410836	0.412765	0.375258	0.393758	0.38428	0.385864	0.392995	0.383423	0.407919	0.398413	0.379277	0.403923	0.398496	0.391232	0.379429	0.37027	0.357577	0.357141	0.368159	0.356826	0.347631	0.354297	0.34714	0.352231	0.342842	0.336879	0.36071	0.348986	0.381092	0.410085	0.404078	0.412403	0.450575	0.503553	0.570297	0.648941
0.509145	0.504753	0.483646	0.490622	0.467907	0.439373	0.438537	0.471718	0.474194	0.465931	0.465715	0.482336	0.429745	0.433295	0.443365	0.414583	0.39892	0.376354	0.410562	0.368821	0.380794	0.3657	0.366821	0.36759	0.318707	0.348308	0.346693	0.319152	0.317119	0.33271	0.340352	0.339135	0.342351	0.334963	0.322258	0.335456	0.338041	0.337152	0.343077	0.339024	0.33907	0.330989	0.33709	0.344543	0.344351	0.361373	0.375623	0.396526	0.431529	0.465408
0.531148	0.519108	0.500333	0.543203	0.557236	0.537624	0.55896	0.573004	0.575238	0.543827	0.581731	0.570975	0.534206	0.501758	0.515532	0.480592	0.482472	0.48524	0.48568	0.462152	0.480061	0.456232	0.480195	0.458532	0.45697	0.441192	0.455175	0.448429	0.444026	0.439432	0.432515	0.426769	0.417755	0.418272	0.40594	0.407002	0.38974	0.394217	0.411025	0.401167	0.405167	0.393609	0.398756	0.403612	0.410248	0.412854	0.439893	0.471223	0.521881	0.587852
0.476926	0.451975	0.413485	0.407832	0.390394	0.388383	0.396361	0.385391	0.385223	0.377949	0.37326	0.367704	0.37584	0.38617	0.380495	0.39508	0.375339	0.376121	0.369696	0.383526	0.349087	0.337542	0.348509	0.339265	0.334405	0.346701	0.351428	0.35027	0.34452	0.342631	0.364163	0.351888	0.347906	0.35433	0.354927	0.350272	0.357126	0.361255	0.361122	0.362544	0.35188	0.354732	0.361124	0.372036	0.413243	0.464446	0.53035	0.606491	0.687152	0.721191
																								0.358646	0.365886	0.369145	0.379967	0.38536	0.364568	0.346386	0.336449	0.328645	0.351549	0.3433	0.35408	0.34544	0.326314	0.364326	0.331641	0.343871	0.364827	0.349225	0.360488	0.400937	0.435988	0.491729	0.499307	0.574084	0.639887
																								0.54214	0.543029	0.550323	0.537488	0.531809	0.537257	0.529682	0.538468	0.534269	0.565845	0.542913	0.542119	0.573567	0.561203	0.532838	0.542067	0.544705	0.545589	0.523163	0.520789	0.525687	0.509624	0.517069	0.513813	0.533647	0.505273
																									0.440107	0.410053	0.387607	0.363148	0.393787	0.393186	0.351434	0.344411	0.325623	0.306187	0.269212	0.276898	0.264748	0.262307	0.255727	0.273665	0.291205	0.320293	0.307839	0.311156	0.36746	0.3848	0.403006	0.43669	0.450765
0.440826	0.45148	0.4488	0.411399	0.439164	0.421701	0.399779	0.337506	0.333724	0.322807	0.311275	0.288411	0.290817	0.329126	0.307003	0.319282	0.311967	0.313792	0.316379	0.300065	0.297357	0.313356	0.34792	0.342758	0.334058	0.340398	0.345983	0.330313	0.329114	0.364516	0.38273	0.40963	0.402117	0.397341	0.397955	0.37974	0.364663	0.376914	0.365731	0.362015	0.387952	0.39297	0.417704	0.423685	0.424423	0.43561	0.437027	0.45816	0.469216	0.533534
				0.636892	0.615895	0.590381	0.584032	0.579567	0.554625	0.54305	0.526355	0.496974	0.523645	0.51324	0.546611	0.523734	0.49913	0.535635	0.518295	0.524976	0.507829	0.504601	0.496982	0.497131	0.467081	0.479345	0.459463	0.466377	0.476548	0.449226	0.463974	0.448123	0.45562	0.444557	0.439245	0.422906	0.437018	0.425152	0.416851	0.427735	0.4335	0.445735	0.431747	0.448504	0.495548	0.575369	0.639026	0.696472	0.736896
																								0.554253	0.525834	0.504026	0.527431	0.566843	0.567243	0.582917	0.598323	0.59561	0.585585	0.575598	0.531928	0.533742	0.547014	0.547688	0.531914	0.568218	0.572095	0.548682	0.55957	0.567843	0.570389	0.587936	0.64419	0.688759	0.665457
0.58806	0.584689	0.604441	0.616522	0.685575	0.671651	0.642965	0.641048	0.613127	0.572382	0.540023	0.510716	0.484644	0.486387	0.462815	0.463215	0.453618	0.438208	0.424934	0.425185	0.46186	0.472517	0.475716	0.459654	0.471383	0.465435	0.465903	0.461681	0.476244	0.476163	0.464905	0.455495	0.480193	0.455582	0.452287	0.459916	0.455173	0.456667	0.474536	0.494618	0.531828	0.519632	0.513844	0.539384	0.553313	0.547611	0.563694	0.547732	0.51965	0.537142
0.40561	0.384645	0.383289	0.366721	0.350332	0.351799	0.334936	0.350855	0.329867	0.347033	0.353623	0.335226	0.338345	0.339926	0.354935	0.339655	0.341458	0.334158	0.347407	0.360316	0.344168	0.342619	0.345811	0.352454	0.392821	0.374176	0.372288	0.38907	0.362445	0.355343	0.394512	0.366096	0.358787	0.365571	0.331784	0.329089	0.334409	0.358753	0.37786	0.368343	0.394736	0.397681	0.403911	0.414299	0.415825	0.431056	0.471067	0.501057	0.55862	0.641358
0.486256	0.473636	0.44612	0.414131	0.385874	0.41378	0.459766	0.449003	0.450175	0.448843	0.42643	0.41273	0.38645	0.361843	0.357696	0.351283	0.346276	0.348418	0.358264	0.338787	0.348162	0.334123	0.333504	0.310471	0.285311	0.292266	0.286415	0.272132	0.245884	0.257943	0.266842	0.268045	0.245654	0.262023	0.256923	0.251377	0.245119	0.24709	0.261988	0.262782	0.25057	0.257917	0.288465	0.315815	0.34566	0.419752	0.491511	0.571837	0.653561	0.726194
0.423503	0.402385	0.451611	0.457755	0.475867	0.476295	0.44861	0.41354	0.396785	0.370848	0.36557	0.364029	0.376131	0.380669	0.371473	0.362818	0.361144	0.360921	0.355963	0.38943	0.371229	0.385966	0.387596	0.364629	0.375859	0.365607	0.370233	0.346811	0.355876	0.34226	0.333097	0.321727	0.34228	0.35185	0.36079	0.364435	0.379665	0.397946	0.44909	0.486154	0.521288	0.580579	0.667697	0.723012	0.793956	0.814917	0.834131	0.927083	0.939906	0.973045
0.596289	0.583068	0.556563	0.569817	0.559262	0.590407	0.590696	0.576098	0.576975	0.554073	0.529478	0.496798	0.483125	0.483235	0.483164	0.470494	0.479314	0.466204	0.458733	0.472456	0.46295	0.468778	0.463825	0.453348	0.453838	0.456412	0.457174	0.446528	0.448676	0.434855	0.442726	0.436646	0.435038	0.433485	0.438707	0.448433	0.463287	0.446905	0.453169	0.449956	0.448096	0.446698	0.492851	0.525023	0.576951	0.645607	0.68709	0.760658	0.788438	0.859355
0.324966	0.342499	0.365809	0.339427	0.35461	0.370058	0.386557	0.391829	0.371432	0.39099	0.418193	0.413452	0.369115	0.350183	0.366448	0.360718	0.367659	0.364295	0.354088	0.340179	0.300545	0.31458	0.322613	0.316346	0.322464	0.319266	0.314082	0.327554	0.315411	0.313201	0.305835	0.311196	0.317531	0.310712	0.298717	0.304073	0.31189	0.309603	0.280941	0.276995	0.272634	0.285707	0.292383	0.282297	0.277693	0.295228	0.307563	0.342996	0.375187	0.453445
0.502359	0.507367	0.519158	0.528244	0.552179	0.547477	0.558477	0.59447	0.61884	0.581509	0.558236	0.548818	0.527155	0.54946	0.540193	0.526015	0.510662	0.515566	0.5098	0.501197	0.493913	0.483811	0.477895	0.462309	0.471979	0.455218	0.455813	0.443754	0.444328	0.432585	0.419195	0.4245	0.424825	0.415195	0.402244	0.415115	0.403501	0.408531	0.420542	0.410889	0.438223	0.417172	0.425965	0.401571	0.40084	0.391521	0.407235	0.438294	0.474024	0.511006
0.582028	0.605067	0.651517	0.699166	0.645585	0.678039	0.661933	0.64537	0.622698	0.580129	0.586455	0.581704	0.553099	0.538174	0.536951	0.498602	0.496424	0.502114	0.521005	0.52152	0.529108	0.532463	0.503773	0.513973	0.505883	0.492561	0.490722	0.484856	0.469253	0.478739	0.483779	0.483962	0.46662	0.487301	0.471791	0.483467	0.459518	0.469831	0.463318	0.47163	0.498326	0.542884	0.611914	0.633814	0.698368	0.691391	0.722348	0.724185	0.722619	0.752115
0.388816	0.386171	0.354115	0.328684	0.328849	0.308265	0.282991	0.292277	0.279701	0.25181	0.245642	0.266634	0.261526	0.260409	0.263743	0.261441	0.265728	0.281013	0.275948	0.272429	0.275809	0.29134	0.284549	0.28428	0.277972	0.273095	0.26616	0.250442	0.259954	0.265385	0.274041	0.295116	0.332833	0.350736	0.345454	0.363092	0.389519	0.385427	0.385123	0.401049	0.414675	0.473497	0.502092	0.526292	0.536929	0.535663	0.591836	0.627638	0.662631	0.70226
		0.639896	0.607543	0.598411	0.539815	0.533521	0.525009	0.512148	0.523057	0.51753	0.526743	0.50472	0.492751	0.472957	0.474169	0.465569	0.456268	0.445589	0.439655	0.440073	0.434956	0.440709	0.44683	0.440511	0.448377	0.438823	0.448481	0.436011	0.43302	0.424351	0.420235	0.421726	0.416448	0.417432	0.408609	0.419936	0.420915	0.419248	0.437855	0.40908	0.412939	0.410997	0.425654	0.434122	0.429039	0.447864	0.49896	0.550128	0.615891
										0.591307	0.490263	0.487521	0.441718	0.432232	0.440437	0.439975	0.445736	0.440864	0.413424	0.397378	0.38848	0.3929	0.376814	0.396884	0.364896	0.380716	0.380672	0.394914	0.386342	0.387657	0.374963	0.388226	0.372368	0.371886	0.330846	0.310005	0.309061	0.28902	0.312361	0.297798	0.296347	0.34176	0.365538	0.463689	0.526055	0.568613	0.596779	0.662817	0.696835
												0.524501	0.531953	0.510974	0.494708	0.474931	0.469073	0.453458	0.455864	0.472892	0.451241	0.456242	0.439156	0.447223	0.431853	0.425982	0.425351	0.41069	0.420418	0.406377	0.39599	0.396358	0.391531	0.380979	0.373465	0.372322	0.362079	0.366109	0.352624	0.348772	0.358176	0.362985	0.371862	0.368519	0.361633	0.356204	0.370061	0.38799	0.422031
																0.384049	0.394418	0.383122	0.400942	0.389024	0.395116	0.399519	0.422885	0.395474	0.404921	0.425095	0.389522	0.369393	0.388653	0.376745	0.391536	0.381362	0.386325	0.368389	0.378082	0.374625	0.3813	0.394928	0.394459	0.414578	0.42411	0.44071	0.442742	0.448967	0.454347	0.446638	0.452164	0.498134	0.526481
0.594126	0.602859	0.588827	0.612871	0.595342	0.543252	0.547403	0.558095	0.541383	0.541661	0.527783	0.521272	0.502515	0.501621	0.48327	0.49049	0.496732	0.50041	0.51504	0.49105	0.499888	0.493612	0.506871	0.521549	0.529479	0.517701	0.52822	0.529459	0.536509	0.520481	0.506517	0.512556	0.493163	0.482077	0.474431	0.477173	0.48197	0.478179	0.473446	0.465694	0.483658	0.481115	0.489049	0.496296	0.523676	0.546239	0.496264	0.522778	0.576275	0.604332
0.557077	0.567934	0.588558	0.556011	0.570048	0.533096	0.481004	0.470458	0.474016	0.480504	0.52466	0.524785	0.521676	0.491186	0.484712	0.48952	0.485699	0.494491	0.510377	0.503592	0.492005	0.496241	0.516862	0.509223	0.521882	0.523228	0.4952	0.488517	0.484155	0.484195	0.487305	0.496336	0.487618	0.49938	0.485327	0.474152	0.461265	0.464188	0.450252	0.45696	0.474148	0.485358	0.484701	0.504727	0.529571	0.547964	0.494561	0.542598	0.560812	0.595982
0.474496	0.502596	0.477712	0.464701	0.497829	0.45021	0.445728	0.452191	0.451904	0.422207	0.41807	0.394304	0.375449	0.379303	0.351018	0.347688	0.331729	0.324841	0.330134	0.332893	0.324789	0.338235	0.341089	0.334895	0.322497	0.320239	0.301043	0.267245	0.270997	0.26489	0.263201	0.267996	0.261905	0.253216	0.25203	0.242711	0.249669	0.24801	0.235504	0.23686	0.244978	0.261884	0.282077	0.326426	0.357635	0.377018	0.345829	0.383672	0.417257	0.438382
0.554764	0.622432	0.594627	0.567868	0.602387	0.545752	0.505468	0.519271	0.473057	0.488487	0.510381	0.496957	0.454123	0.455848	0.434932	0.452494	0.456807	0.442824	0.452752	0.435599	0.42875	0.429721	0.412042	0.424207	0.406	0.432834	0.441399	0.420286	0.432305	0.418231	0.434543	0.430497	0.419277	0.416987	0.401593	0.379813	0.362084	0.365456	0.355786	0.364102	0.381	0.406103	0.437695	0.461273	0.523936	0.547891	0.516945	0.524047	0.586039	0.639173
0.572681	0.586032	0.552781	0.603203	0.565725	0.575838	0.547166	0.540503	0.517486	0.498509	0.501998	0.502023	0.559392	0.525739	0.537217	0.481528	0.496991	0.501723	0.514306	0.498237	0.497978	0.52487	0.532383	0.521921	0.516332	0.505665	0.48545	0.462581	0.465417	0.447108	0.444067	0.418688	0.399679	0.420791	0.420941	0.422049	0.443985	0.444654	0.457275	0.420776	0.406303	0.420725	0.424097	0.412214	0.42109	0.422871	0.397716	0.457219	0.515689	0.540245
0.475866	0.4381	0.452947	0.421723	0.448951	0.44535	0.514249	0.492628	0.482822	0.493767	0.47782	0.461028	0.433852	0.422301	0.464888	0.481412	0.436557	0.402456	0.433785	0.401694	0.384739	0.402795	0.400263	0.368939	0.38104	0.36341	0.346266	0.356761	0.348699	0.340269	0.347943	0.343195	0.331318	0.340361	0.335546	0.376937	0.378108	0.425775	0.455355	0.450659	0.488207	0.512984	0.578862	0.613396	0.644535	0.715134	0.718303	0.777491	0.901566	0.953355
0.575238	0.591436	0.634899	0.669231	0.645482	0.607498	0.612597	0.614114	0.576979	0.565147	0.549902	0.513327	0.484905	0.43733	0.438667	0.429021	0.422894	0.430885	0.434695	0.437552	0.445336	0.449207	0.440166	0.442747	0.415406	0.441448	0.428513	0.405726	0.400868	0.366689	0.384091	0.376161	0.375323	0.390589	0.402932	0.393906	0.403126	0.433101	0.446273	0.471609	0.512587	0.571123	0.65043	0.721156	0.765779	0.821111	0.835773	0.904529	0.89189	0.909495
[truncated: 25 more columns]

## Sheet: Abemaciclib_G1 (CDK4)
Time since mitogen stimulation (hr)
0.2	0.4	0.6	0.8	1	1.2	1.4	1.6	1.8	2	2.2	2.4	2.6	2.8	3	3.2	3.4	3.6	3.8	4	4.2	4.4	4.6	4.8	5	5.2	5.4	5.6	5.8	6	6.2	6.4	6.6	6.8	7	7.2	7.4	7.6	7.8	8	8.2	8.4	8.6	8.8	9	9.2	9.4	9.6	9.8	10
0.835537	0.839031	0.800367	0.847006	0.83381	0.830656	0.817556	0.766047	0.771757	0.754207	0.749492	0.641019	0.574971	0.600703	0.620509	0.547203	0.607493	0.58466	0.568033	0.598597	0.626699	0.576751	0.561569	0.544215	0.58426	0.545286	0.587605	0.541866	0.623305	0.596635	0.521455	0.493322	0.515521	0.491536	0.516347	0.553236	0.629504	0.71831	0.742016	0.773676	0.757907	0.79123	0.767886	0.696039	0.7636	0.770363	0.776269	0.822773	0.937524	1.01063
0.756027	0.676347	0.656765	0.555956	0.509619	0.534619	0.527095	0.477153	0.548729	0.583875	0.575917	0.539181	0.540697	0.520881	0.53213	0.507304	0.470864	0.474447	0.535553	0.54465	0.500811	0.471755	0.417402	0.388371	0.397282	0.418415	0.434684	0.418049	0.422157	0.446257	0.467039	0.494139	0.535715	0.593957	0.792236	1.04827	1.0843	1.07314	1.06903	1.09884	1.10574	1.14816	1.14163	1.16906	1.14755	1.21349	1.2091	1.24797	1.26256	1.21571
0.514904	0.528699	0.492817	0.4683	0.385227	0.367736	0.356219	0.304925	0.29448	0.281216	0.260277	0.274268	0.273031	0.271263	0.277301	0.272148	0.282666	0.257625	0.262168	0.254623	0.257278	0.245628	0.258176	0.266104	0.274679	0.30323	0.325634	0.332714	0.3435	0.368481	0.373441	0.342571	0.337097	0.349485	0.391592	0.564545	0.880715	1.03931	1.08832	1.05263	1.17159	1.19118	1.2237	1.27426	1.3823	1.37996	1.40089	1.36601	1.42698	1.40698
0.375109	0.300438	0.240962	0.224602	0.212632	0.211495	0.202316	0.198598	0.202741	0.198906	0.208666	0.202418	0.186088	0.188354	0.198738	0.182447	0.196549	0.199823	0.189207	0.194686	0.18345	0.156002	0.157104	0.160807	0.160636	0.161197	0.170219	0.207866	0.215933	0.233904	0.221281	0.24204	0.260313	0.289488	0.288318	0.29888	0.30391	0.307861	0.337765	0.377839	0.409596	0.390021	0.40476	0.412591	0.524413	0.606685	0.664843	0.738444	0.807948	0.880128
												0.56151	0.553241	0.516423	0.567315	0.509616	0.516588	0.508561	0.513441	0.516482	0.52155	0.543937	0.539981	0.573254	0.56285	0.494711	0.485508	0.486037	0.490085	0.489745	0.489893	0.511881	0.584424	0.810741	0.93423	1.05239	0.875776	0.948003	1.07042	1.06598	1.02907	1.04924	0.987247	1.03972	1.07045	1.11184	1.16603	1.25158	1.39401
0.784495	0.827874	0.856816	0.867005	0.774903	0.769983	0.741723	0.659151	0.632324	0.578818	0.602966	0.575421	0.570022	0.593399	0.562909	0.549918	0.503565	0.496791	0.492055	0.428787	0.47074	0.363574	0.365717	0.348896	0.362468	0.3629	0.342093	0.342183	0.366212	0.367451	0.376941	0.341831	0.384082	0.441282	0.456979	0.429198	0.377458	0.361991	0.355125	0.320074	0.338833	0.347753	0.277519	0.309181	0.375057	0.496903	0.797784	0.883983	0.971756	1.11244
0.960198	0.93976	0.91899	0.944148	0.850533	0.84531	0.828177	0.831502	0.835379	0.829876	0.814634	0.799894	0.747053	0.780396	0.816672	0.707983	0.715387	0.679596	0.699324	0.593736	0.632636	0.574142	0.554193	0.524697	0.508359	0.477958	0.483077	0.469243	0.450722	0.457273	0.451315	0.439508	0.469084	0.472148	0.47985	0.448885	0.46076	0.47507	0.447146	0.500807	0.751304	1.0285	1.1588	1.09506	1.03078	1.0657	1.04372	1.03936	1.23474	1.24353
0.816003	0.671838	0.672449	0.687652	0.691179	0.689281	0.674401	0.639954	0.613201	0.62658	0.599382	0.563503	0.564737	0.572377	0.577471	0.586785	0.604786	0.591781	0.593843	0.635334	0.599657	0.53787	0.530267	0.567834	0.469846	0.509291	0.558302	0.44372	0.471144	0.390631	0.34224	0.333683	0.351676	0.390877	0.410395	0.420291	0.435986	0.459923	0.519575	0.516004	0.498333	0.587162	0.676696	0.771185	0.834116	0.785706	0.92984	1.00205	0.979664	1.11096
0.858114	0.908559	0.889365	0.843077	0.756492	0.627189	0.615131	0.575102	0.566259	0.601651	0.619887	0.624874	0.648533	0.607128	0.616032	0.554234	0.591121	0.617196	0.576386	0.562556	0.539368	0.514842	0.522209	0.528625	0.542816	0.545998	0.552483	0.538268	0.548951	0.536325	0.524223	0.519652	0.525013	0.487439	0.488858	0.458074	0.429211	0.432167	0.37783	0.412832	0.440017	0.49713	0.630592	0.814672	0.985375	1.0906	1.09747	1.13869	1.12324	1.17215
0.86584	0.723396	0.70476	0.769851	0.713526	0.67928	0.628891	0.634143	0.784984	0.724855	0.736612	0.626184	0.588941	0.608811	0.588307	0.556297	0.591854	0.583224	0.660532	0.651583	0.633251	0.634503	0.547418	0.572148	0.612074	0.561503	0.502793	0.452995	0.509834	0.529747	0.618846	0.533367	0.491608	0.461377	0.457875	0.447864	0.476036	0.484047	0.476713	0.494466	0.530322	0.628742	0.705961	0.797269	0.798337	0.805717	0.904027	1.04995	1.1201	1.17976
0.751791	0.709224	0.709491	0.673204	0.641308	0.605485	0.645107	0.679928	0.606934	0.52951	0.542052	0.533491	0.548032	0.500068	0.516202	0.457919	0.421732	0.386074	0.402644	0.443964	0.445166	0.425377	0.454568	0.439984	0.469286	0.449908	0.443574	0.450357	0.410368	0.478005	0.481094	0.47111	0.420781	0.467256	0.523726	0.5921	0.618946	0.679083	0.72947	0.705899	0.830213	0.949955	1.00221	1.01587	1.16726	1.10373	1.11246	1.1387	1.20941	1.19356
0.803166	0.738095	0.732286	0.717981	0.693961	0.628237	0.62466	0.530963	0.559589	0.482645	0.514966	0.504791	0.495774	0.497333	0.494231	0.504657	0.55953	0.562706	0.638516	0.673986	0.633504	0.627016	0.736616	0.692476	0.638121	0.646619	0.641126	0.722167	0.710944	0.804445	0.760067	0.696395	0.736373	0.747719	0.866943	1.02617	1.19359	1.41349	1.37283	1.29814	1.20945	1.09466	1.13478	1.23569	1.41328	1.336	1.24069	1.5383	1.67411	2.01924
0.510623	0.544892	0.506952	0.620879	0.586969	0.577282	0.480646	0.478678	0.532279	0.498915	0.476569	0.464476	0.444802	0.407885	0.363387	0.38986	0.3746	0.361862	0.363378	0.371461	0.403682	0.38926	0.377554	0.411763	0.405093	0.436421	0.463557	0.45434	0.470061	0.464347	0.460687	0.432848	0.415346	0.382369	0.40405	0.433457	0.458093	0.456563	0.534328	0.746402	1.09362	1.13311	1.19619	1.17152	1.17453	1.05393	1.07524	0.826488	0.723529	0.872587
0.918618	0.923267	0.854494	0.779922	0.776937	0.764376	0.704929	0.715267	0.720001	0.726056	0.699461	0.711968	0.790776	0.788524	0.795426	0.777808	0.815506	0.828452	0.836979	0.811901	0.76295	0.788363	0.757699	0.716766	0.715556	0.678329	0.710609	0.70612	0.706686	0.689382	0.637263	0.618883	0.588255	0.570908	0.585205	0.555594	0.535318	0.485097	0.46888	0.471231	0.461765	0.484318	0.577314	0.897955	1.09779	1.1474	1.20899	1.2148	1.24954	1.31396
0.658084	0.740554	0.735399	0.704424	0.682967	0.642441	0.555373	0.509203	0.488329	0.490763	0.460673	0.486962	0.505075	0.545264	0.484461	0.552338	0.48872	0.464966	0.499375	0.547848	0.510453	0.556149	0.575736	0.5675	0.497404	0.418065	0.432623	0.415939	0.36021	0.345187	0.36604	0.461505	0.681444	0.863878	0.901445	1.03829	1.04156	1.06723	1.12193	1.10377	1.05997	1.03513	0.957667	1.06381	1.10237	1.00274	1.1377	1.14534	1.21015	1.37004
0.799195	0.758943	0.758663	0.695157	0.661141	0.66043	0.553465	0.517139	0.524855	0.488093	0.453745	0.439198	0.42486	0.413579	0.445214	0.393655	0.439441	0.445591	0.459232	0.476966	0.448231	0.447436	0.442893	0.460964	0.41549	0.457787	0.474384	0.463373	0.43126	0.450068	0.425127	0.428843	0.40084	0.45588	0.435694	0.456093	0.527928	0.68186	0.916172	1.02854	1.07278	1.12325	1.1477	1.10315	1.15513	1.13756	1.10357	1.12033	1.09781	1.06195
																0.648188	0.684482	0.799339	0.71048	0.788263	0.698301	0.678473	0.677339	0.625872	0.574129	0.626186	0.584295	0.532332	0.503362	0.467608	0.497068	0.485443	0.49922	0.447843	0.45221	0.44563	0.476409	0.65998	1.07748	1.32828	1.33736	1.32836	1.32465	1.26801	1.36389	1.37489	1.29628	1.31238	1.31134
0.687074	0.675166	0.621562	0.658484	0.669561	0.581702	0.572846	0.629872	0.610177	0.557281	0.527222	0.424984	0.46122	0.430368	0.397206	0.405728	0.400755	0.386389	0.399849	0.429744	0.427132	0.465635	0.449254	0.443243	0.429567	0.476282	0.476171	0.475288	0.474656	0.470451	0.45275	0.432967	0.419376	0.430206	0.470572	0.51347	0.540013	0.652865	0.822901	1.01676	1.10857	1.06076	1.10767	1.1412	1.04345	0.9873	1.02506	1.07197	1.07969	1.05139
0.584224	0.573037	0.548606	0.521851	0.489964	0.488608	0.479237	0.480784	0.471224	0.46029	0.458033	0.44571	0.471401	0.447887	0.465869	0.469634	0.488533	0.49579	0.475674	0.480004	0.484536	0.466281	0.457158	0.44941	0.433447	0.43579	0.515737	0.801717	1.16841	1.25501	1.22177	1.29001	1.31769	1.35088	1.29883	1.36895	1.42958	1.45942	1.50034	1.43299	1.49318	1.49955	1.46796	1.52197	1.54794	1.44709	1.39802	1.33403	1.26456	1.2319
0.709668	0.686219	0.641667	0.597841	0.62924	0.591491	0.56975	0.545581	0.563172	0.552426	0.511643	0.523658	0.515974	0.574352	0.58013	0.603224	0.589294	0.609097	0.574641	0.615528	0.575973	0.525608	0.542445	0.551095	0.539993	0.5719	0.524135	0.509259	0.557788	0.58563	0.550245	0.550173	0.549445	0.511043	0.523875	0.543601	0.576724	0.582824	0.571069	0.588753	0.506956	0.52981	0.531376	0.491264	0.505296	0.597488	0.733732	0.927053	0.915793	1.00914
0.459357	0.554049	0.539797	0.57102	0.528657	0.630732	0.61917	0.683753	0.692116	0.724992	0.690895	0.730186	0.755591	0.727843	0.647005	0.72307	0.632227	0.597999	0.59135	0.585715	0.5931	0.615852	0.584625	0.615666	0.491048	0.522154	0.500039	0.515055	0.509568	0.521688	0.565343	0.561066	0.553219	0.555664	0.585514	0.688224	0.723652	0.736251	0.780397	0.808583	0.860118	0.877864	0.971041	1.03996	1.0641	1.24775	1.12464	1.09731	1.24256	1.18563
0.51602	0.524175	0.535373	0.568248	0.539502	0.501891	0.52479	0.550648	0.606959	0.60531	0.644527	0.620635	0.603601	0.594431	0.576734	0.590957	0.555416	0.545435	0.574735	0.560258	0.521978	0.520871	0.493555	0.46988	0.462405	0.466928	0.464249	0.454383	0.479398	0.459773	0.416227	0.436505	0.443248	0.439118	0.468991	0.490435	0.490865	0.504449	0.604311	0.702682	0.826643	0.826088	0.883184	0.912636	0.927735	0.972239	1.02149	1.02891	1.11579	1.11359
0.74862	0.763413	0.71022	0.740248	0.65117	0.65452	0.647746	0.64896	0.636832	0.652422	0.666925	0.641472	0.665966	0.645518	0.626308	0.593749	0.574143	0.594581	0.569155	0.552317	0.554776	0.505081	0.502699	0.466855	0.468814	0.438975	0.439225	0.41491	0.390662	0.370851	0.347873	0.322456	0.325601	0.34142	0.317691	0.309576	0.338657	0.353745	0.450208	0.653062	0.845031	0.983874	1.09545	1.01047	1.00279	1.03926	1.09612	1.06907	1.098	1.13296
0.740499	0.702114	0.679536	0.683319	0.547826	0.5577	0.56345	0.56902	0.534938	0.515419	0.559029	0.504521	0.533454	0.551631	0.549015	0.5099	0.479395	0.465137	0.440665	0.413713	0.433805	0.437606	0.440511	0.440924	0.440965	0.421184	0.396327	0.391753	0.391601	0.396702	0.416067	0.426395	0.426052	0.418169	0.438963	0.449847	0.46173	0.455285	0.463657	0.450856	0.455059	0.435411	0.439901	0.462887	0.551138	0.659778	0.802992	0.955917	0.991037	1.06667
															0.54436	0.502108	0.49836	0.468433	0.459767	0.481808	0.459586	0.465451	0.447412	0.45143	0.423596	0.429046	0.403069	0.413572	0.413553	0.393769	0.422364	0.567704	0.797745	0.927286	0.897725	0.954704	0.885748	0.966387	0.999852	1.05324	1.1409	1.16449	1.21388	1.24042	1.15243	1.18231	1.31235	1.32985	1.36973
0.639075	0.661026	0.60993	0.621108	0.678441	0.629737	0.546916	0.468968	0.434339	0.386215	0.40973	0.400799	0.376286	0.377337	0.367556	0.381017	0.400392	0.392063	0.406731	0.40512	0.416341	0.430992	0.430746	0.469855	0.481573	0.463545	0.423693	0.392514	0.360067	0.366442	0.35783	0.357259	0.391341	0.398892	0.387351	0.377375	0.384208	0.39297	0.432113	0.440737	0.490555	0.525431	0.613267	0.72831	0.80829	0.974097	1.06424	1.08883	1.13528	1.29691
0.352678	0.318426	0.241344	0.194146	0.20317	0.228397	0.247607	0.2397	0.225852	0.22745	0.250447	0.220504	0.218773	0.220357	0.213447	0.215604	0.19929	0.208344	0.224604	0.229003	0.21954	0.211912	0.213537	0.215427	0.191827	0.208657	0.193629	0.201687	0.211566	0.214387	0.230595	0.246557	0.263574	0.362622	0.734105	0.919488	0.966105	0.994211	1.054	1.05331	1.08264	1.07868	1.03851	1.08684	1.05738	1.10094	1.15615	1.1617	1.1441	1.10505
0.555066	0.633132	0.598097	0.530202	0.599854	0.623919	0.656852	0.62858	0.592139	0.454055	0.353505	0.302761	0.298134	0.330534	0.306633	0.314006	0.301282	0.280583	0.321419	0.352856	0.360913	0.386028	0.412935	0.446964	0.452452	0.457515	0.472315	0.481438	0.491223	0.503553	0.526721	0.551894	0.544962	0.559348	0.547521	0.59128	0.599922	0.683761	0.70762	0.730761	0.779944	0.804842	0.927686	0.949689	0.973838	1.06521	1.01462	1.04391	1.09472	1.13945
															0.72415	0.72133	0.722075	0.749622	0.789654	0.787005	0.811646	0.792668	0.755627	0.70705	0.710463	0.761335	0.761687	0.748751	0.731617	0.750132	0.941324	1.07769	1.08029	1.07599	1.05888	0.946748	0.903883	0.875797	0.986031	0.992645	1.06511	0.993798	0.984763	1.07181	1.04997	1.10191	1.05835	1.09274	1.15147
																	0.786094	0.767034	0.819013	0.781437	0.796741	0.743909	0.769339	0.788074	0.759451	0.764781	0.720043	0.646359	0.619864	0.568558	0.531828	0.546675	0.581356	0.571277	0.688036	0.802098	1.16501	1.26324	1.34202	1.20175	1.2373	1.29347	1.27126	1.2888	1.325	1.35697	1.32263	1.30592	1.23726
																								0.482042	0.515044	0.513108	0.535504	0.556026	0.554805	0.568464	0.564425	0.565856	0.570955	0.575448	0.599274	0.577335	0.558552	0.574716	0.594078	0.620208	0.645205	0.671279	0.678542	0.764629	0.946786	1.04962	1.20115	1.30899	1.41765
0.545303	0.470149	0.459069	0.468085	0.438505	0.408017	0.394711	0.391882	0.373557	0.356451	0.379671	0.43483	0.427094	0.426941	0.414188	0.364433	0.391485	0.374195	0.355402	0.357029	0.356551	0.355053	0.41329	0.429887	0.409638	0.418715	0.413684	0.38589	0.430923	0.891168	1.07088	1.13766	1.11099	1.09462	1.09779	0.951001	0.952116	0.864917	0.829814	0.847175	0.812171	0.798497	0.825982	0.775701	0.797344	0.718024	0.655758	0.660434	0.604679	0.698315
0.515156	0.538551	0.520405	0.490639	0.477763	0.461778	0.40687	0.355348	0.359216	0.290092	0.296565	0.284874	0.271034	0.237111	0.266665	0.248792	0.24034	0.232798	0.237116	0.231627	0.221594	0.229747	0.223271	0.225944	0.229154	0.230722	0.233161	0.240732	0.23221	0.249831	0.264788	0.263452	0.276293	0.28603	0.300537	0.371689	0.483785	0.547694	0.667193	0.813124	0.899523	0.940328	0.980466	1.06119	1.10993	1.18115	1.1789	1.2326	1.26259	1.25385
0.864284	0.901362	0.795165	0.715688	0.718044	0.691196	0.663615	0.637362	0.643666	0.710535	0.711123	0.698258	0.588243	0.553517	0.59428	0.576752	0.558931	0.519754	0.50936	0.543088	0.528839	0.564209	0.5392	0.51869	0.517873	0.517248	0.49414	0.48003	0.461166	0.434613	0.445211	0.47313	0.442879	0.483985	0.510454	0.516137	0.537751	0.573548	0.630848	0.696125	0.767338	0.865502	1.04239	1.06106	1.02797	1.11202	1.19737	1.21098	1.21718	1.39921
0.965962	0.929119	0.877404	0.869695	0.892582	0.859146	0.854626	0.763517	0.703677	0.647682	0.654018	0.653398	0.5869	0.598212	0.616702	0.682085	0.657272	0.610516	0.628205	0.68996	0.675097	0.691848	0.660134	0.620899	0.661451	0.615612	0.585878	0.647163	0.630471	0.661794	0.634697	0.63756	0.614276	0.606072	0.601715	0.618794	0.594023	0.591619	0.597243	0.589331	0.595867	0.574433	0.557879	0.559799	0.576229	0.609425	0.67376	0.806244	0.932717	1.0378
0.800996	0.810776	0.720027	0.694337	0.671312	0.651323	0.677013	0.62177	0.601895	0.611629	0.569018	0.622843	0.550063	0.607103	0.553587	0.53323	0.534717	0.543856	0.581918	0.537295	0.514452	0.508202	0.502596	0.519708	0.518493	0.494801	0.479706	0.497599	0.52759	0.567304	0.613496	0.879667	1.24643	1.28301	1.27595	1.34854	1.31302	1.39006	1.30559	1.37394	1.38766	1.37756	1.43739	1.44298	1.46402	1.59343	1.56813	1.52145	1.49106	1.48877
0.998092	0.868539	0.758824	0.704019	0.620823	0.62951	0.570171	0.582033	0.594063	0.627918	0.631416	0.642914	0.667182	0.619282	0.624635	0.617763	0.657564	0.701366	0.753133	0.806832	0.79852	0.77507	0.766325	0.810144	0.887384	0.875645	0.887557	0.80351	0.810688	0.82268	0.89306	0.971311	0.786525	0.662164	0.576847	0.596523	0.605649	0.608609	0.669178	0.757344	0.85807	1.00597	1.17385	1.01715	1.10457	0.813535	0.962164	0.992333	0.9733	0.995088
0.755259	0.7473	0.687615	0.693661	0.704156	0.697014	0.714402	0.687134	0.672221	0.64861	0.601793	0.642862	0.579589	0.602788	0.555776	0.55398	0.5527	0.541486	0.542351	0.520525	0.487887	0.471058	0.44426	0.42295	0.379536	0.33254	0.356625	0.362062	0.370525	0.377905	0.372545	0.340145	0.348131	0.345033	0.364137	0.347354	0.370556	0.354098	0.37623	0.372073	0.411662	0.557373	0.857589	1.04357	1.07274	1.1595	1.2042	1.22179	1.24131	1.30125
0.751114	0.742321	0.773173	0.712276	0.672695	0.604431	0.690447	0.713463	0.726893	0.77754	0.729484	0.729222	0.681698	0.714852	0.689489	0.623196	0.634895	0.624575	0.622907	0.64476	0.547533	0.562697	0.561282	0.507379	0.438197	0.427839	0.425232	0.394402	0.384837	0.413773	0.406057	0.430091	0.429378	0.497051	0.473261	0.454641	0.452854	0.489367	0.481947	0.503122	0.545014	0.799185	1.03672	1.07982	1.08074	1.11172	1.10401	1.10958	1.07578	1.02462
0.602753	0.546892	0.543579	0.610851	0.663269	0.577616	0.510045	0.492037	0.443546	0.446641	0.441832	0.437813	0.41267	0.442095	0.434209	0.432239	0.433488	0.417748	0.432933	0.468954	0.421596	0.438374	0.417635	0.42848	0.483768	0.49311	0.462111	0.457285	0.474075	0.472281	0.462279	0.449127	0.48411	0.452186	0.436464	0.448316	0.446398	0.440428	0.488379	0.571059	0.854463	0.994307	1.03924	1.09244	1.08704	1.07185	1.10537	1.11028	1.12068	1.1232
0.6237	0.57436	0.59399	0.575239	0.536697	0.542154	0.52592	0.535692	0.498241	0.500013	0.485186	0.49224	0.472162	0.477104	0.466015	0.433858	0.409918	0.433502	0.407788	0.410056	0.393263	0.34883	0.329699	0.333217	0.344754	0.321245	0.334117	0.367236	0.359852	0.367899	0.382227	0.417655	0.412587	0.488266	0.712844	0.937055	1.04903	1.07416	1.09328	1.14755	1.17655	1.14121	1.18176	1.19663	1.13558	1.14357	1.14394	1.15689	1.22517	1.22094
0.734506	0.696168	0.617514	0.586346	0.587445	0.575973	0.562587	0.549428	0.565896	0.556672	0.585173	0.509606	0.504347	0.466964	0.445119	0.47928	0.492755	0.460869	0.441514	0.444708	0.439613	0.452407	0.478216	0.42443	0.417624	0.435635	0.433988	0.428402	0.429699	0.46996	0.511461	0.48877	0.518754	0.500737	0.515143	0.495145	0.519519	0.513156	0.550901	0.585946	0.696554	0.816643	0.866632	1.01406	1.09694	1.02483	1.02326	1.07074	1.0932	1.01048
0.69459	0.728783	0.657626	0.646251	0.59842	0.595352	0.553629	0.520802	0.460436	0.440084	0.471188	0.488691	0.426909	0.453042	0.450666	0.465518	0.446307	0.46899	0.447881	0.440267	0.391686	0.38413	0.361964	0.338797	0.359864	0.33906	0.343932	0.370343	0.355951	0.371592	0.395145	0.41025	0.422053	0.413729	0.388613	0.407107	0.41149	0.401335	0.447473	0.454454	0.56724	0.707863	0.87483	0.909703	0.887661	0.954134	0.95774	1.06194	1.07201	1.1779
	0.926565	0.890551	0.803541	0.751131	0.755481	0.735585	0.820815	0.734732	0.803425	0.835741	0.763042	0.683267	0.729445	0.750956	0.688317	0.712659	0.678312	0.659419	0.656353	0.643953	0.65555	0.642206	0.689652	0.604486	0.569277	0.578306	0.548195	0.573695	0.527018	0.54743	0.524834	0.544583	0.50584	0.493339	0.503404	0.510976	0.502491	0.505923	0.530819	0.558529	0.539529	0.57872	0.657256	0.994616	1.10523	1.12556	1.09317	1.09265	1.14273
0.719489	0.708835	0.632316	0.574181	0.512245	0.587047	0.562199	0.561021	0.518714	0.531902	0.51328	0.461937	0.44972	0.434108	0.453333	0.432986	0.415052	0.375413	0.356911	0.330864	0.330985	0.330702	0.354572	0.339119	0.354762	0.36174	0.379906	0.355146	0.335227	0.358521	0.37344	0.37282	0.388836	0.413088	0.355204	0.354734	0.357054	0.38189	0.427499	0.55504	0.857838	1.04297	1.01578	1.06748	1.06124	1.05005	1.02246	1.02324	1.00934	1.03928
0.663991	0.530774	0.495909	0.48184	0.45642	0.422287	0.470855	0.407559	0.404814	0.351434	0.352431	0.343832	0.371813	0.370672	0.375874	0.380363	0.380986	0.348821	0.337584	0.366791	0.348015	0.338923	0.326484	0.304258	0.307302	0.289172	0.274552	0.284852	0.263225	0.251606	0.251956	0.256433	0.256114	0.249777	0.256167	0.239663	0.253031	0.257949	0.27553	0.308888	0.400655	0.64287	0.889442	1.03303	1.07171	1.09317	1.14155	1.18043	1.20795	1.21445
0.689826	0.661808	0.622476	0.642537	0.766753	0.736805	0.695432	0.664705	0.648997	0.663441	0.591813	0.536297	0.526826	0.561926	0.583414	0.60497	0.563316	0.55717	0.525692	0.563712	0.569917	0.573568	0.605926	0.601182	0.576531	0.527747	0.506063	0.499284	0.443113	0.454815	0.459302	0.452798	0.441421	0.461354	0.471204	0.454094	0.462823	0.447133	0.40213	0.452773	0.454143	0.452935	0.489497	0.509636	0.559733	0.627935	0.748781	0.967429	1.0904	1.16512
0.685439	0.753215	0.74993	0.70554	0.675396	0.665506	0.63608	0.844998	0.781713	0.77121	0.644126	0.750477	0.809085	0.819019	0.755772	0.693757	0.657886	0.674675	0.670153	0.680078	0.670205	0.625926	0.593796	0.59484	0.5711	0.529453	0.496086	0.506441	0.554569	0.580678	0.63529	0.626057	0.667412	0.690328	0.737545	0.785712	0.875059	0.994061	1.0299	0.989861	1.04953	1.05632	1.13467	1.1583	1.21974	1.17638	1.25099	1.30109	1.30724	1.3842
0.655992	0.602773	0.517704	0.563378	0.574816	0.585261	0.583391	0.599037	0.61163	0.615943	0.58372	0.566216	0.540685	0.52425	0.500396	0.474542	0.475179	0.432764	0.42022	0.423668	0.431031	0.43699	0.434088	0.442394	0.479437	0.455038	0.483315	0.441989	0.432357	0.407869	0.456875	0.405586	0.398834	0.357675	0.349663	0.34183	0.372823	0.364949	0.391203	0.391397	0.42897	0.51515	0.830131	1.05922	1.11497	1.03264	1.06614	1.04083	1.09886	1.24349
0.874027	0.760308	0.644666	0.596741	0.618174	0.610977	0.661286	0.636409	0.597046	0.575043	0.512229	0.466798	0.494525	0.428741	0.467435	0.481904	0.483708	0.474649	0.469095	0.502932	0.476562	0.464327	0.470843	0.465385	0.47948	0.476906	0.477034	0.497555	0.485971	0.495226	0.519665	0.544504	0.627385	0.759567	0.906777	1.08997	1.21905	1.13351	1.15519	1.24424	1.17271	1.0754	1.1036	1.17763	1.21068	1.30367	1.35219	1.31172	1.38497	1.42792
0.816696	0.882111	0.847481	0.737058	0.646117	0.667323	0.591547	0.62335	0.51125	0.487668	0.437228	0.417871	0.398284	0.428958	0.44512	0.42942	0.422822	0.406448	0.401606	0.399242	0.399457	0.391071	0.377287	0.400704	0.403831	0.401583	0.417139	0.405426	0.390095	0.377775	0.408846	0.5096	0.81069	1.00145	1.06971	1.15899	1.11909	1.19022	1.24058	1.2204	1.26579	1.28282	1.33485	1.36286	1.36094	1.29718	1.2437	1.30185	1.30978	1.31191
0.802177	0.747393	0.690781	0.638103	0.642323	0.611842	0.551995	0.581582	0.546982	0.493156	0.512002	0.502387	0.494919	0.482623	0.483881	0.501444	0.494898	0.449643	0.448535	0.420353	0.43885	0.434104	0.442364	0.453264	0.46742	0.453136	0.444435	0.424802	0.423734	0.415245	0.415246	0.409057	0.40451	0.402408	0.377635	0.357261	0.373153	0.516082	0.800854	1.00351	1.15286	1.13486	1.13726	1.12137	1.0998	1.15832	1.18323	1.24877	1.20464	1.23065
0.778228	0.787766	0.729742	0.804682	0.817025	0.820545	0.692657	0.686486	0.597669	0.512358	0.481765	0.431034	0.387963	0.341668	0.321742	0.275395	0.287063	0.319445	0.34233	0.373201	0.352432	0.319962	0.313658	0.346981	0.324226	0.304329	0.320705	0.319627	0.337794	0.341895	0.340612	0.349395	0.39519	0.426555	0.402801	0.408658	0.418359	0.45707	0.471124	0.516187	0.665082	1.00784	1.13673	1.24647	1.27268	1.30264	1.36571	1.45319	1.53332	1.47302
0.83255	0.740323	0.677913	0.708751	0.654202	0.68519	0.61261	0.738346	0.682553	0.621387	0.6302	0.629054	0.679159	0.695696	0.648401	0.620462	0.63627	0.642314	0.658467	0.709496	0.691289	0.665911	0.742231	0.745131	0.763783	0.805925	0.812148	0.864946	0.784563	0.690281	0.651799	0.602035	0.608991	0.596443	0.602672	0.569388	0.573864	0.598263	0.600629	0.687278	0.740848	0.71656	0.716715	0.740442	0.745281	0.777702	0.727993	0.796194	0.984527	1.07212
0.886055	0.853733	0.806329	0.779551	0.742439	0.65016	0.622431	0.632222	0.69846	0.614868	0.587816	0.562425	0.502022	0.464146	0.464484	0.496868	0.48025	0.466971	0.448688	0.453486	0.473153	0.469864	0.427244	0.429309	0.480558	0.484834	0.445558	0.418591	0.380967	0.365376	0.386226	0.416094	0.399718	0.3827	0.402326	0.413328	0.439851	0.423592	0.428428	0.462663	0.467127	0.459219	0.493562	0.568593	0.773681	0.937509	1.00525	1.01824	1.04939	1.02347
0.530921	0.552385	0.506101	0.451301	0.469126	0.467246	0.518801	0.632843	0.598011	0.570224	0.588272	0.578846	0.575369	0.551492	0.591613	0.612233	0.61467	0.617732	0.628087	0.595637	0.587218	0.542622	0.53341	0.547917	0.452625	0.372601	0.355228	0.360649	0.35107	0.374191	0.421964	0.526347	0.730934	0.928559	0.987599	0.96959	1.05853	1.14908	1.19788	1.27478	1.25371	1.22364	1.3965	1.53135	1.56182	1.61065	1.69664	1.66927	1.77471	1.77005
			0.489909	0.575279	0.537819	0.515171	0.516366	0.523285	0.554216	0.527882	0.574044	0.616564	0.543142	0.519484	0.589388	0.630067	0.646001	0.600118	0.655181	0.578924	0.510535	0.526683	0.475496	0.509866	0.499451	0.524407	0.528459	0.57698	0.528354	0.540896	0.513485	0.504802	0.513469	0.514197	0.567772	0.595503	0.607642	0.681442	0.710469	0.769975	0.935168	0.999761	1.04476	1.04181	1.14064	1.15539	1.19446	1.19804	1.20183
																						0.440103	0.439686	0.481283	0.492584	0.520159	0.523071	0.569396	0.547284	0.532715	0.578783	0.542731	0.566363	0.553622	0.551737	0.558692	0.59169	0.598061	0.580419	0.61541	0.661639	0.679641	0.622811	0.682495	0.782641	0.923274	1.12867	1.30538	1.32791
0.864736	0.795271	0.778647	0.774434	0.767098	0.736074	0.671047	0.649517	0.603952	0.567019	0.579004	0.543641	0.545713	0.57018	0.552101	0.480688	0.451647	0.472155	0.484575	0.505783	0.502584	0.50617	0.5085	0.554004	0.461052	0.459625	0.474203	0.461427	0.474359	0.4476	0.451102	0.485911	0.471258	0.438938	0.459446	0.444647	0.482399	0.510398	0.488262	0.540059	0.513981	0.537518	0.573523	0.688564	0.876281	0.832951	0.812836	0.804584	0.716212	0.754059
0.658044	0.605069	0.568426	0.54408	0.532987	0.512008	0.503769	0.479744	0.463924	0.441842	0.405671	0.39968	0.424388	0.430587	0.458441	0.450239	0.487629	0.48827	0.487032	0.515017	0.484585	0.47112	0.48334	0.491311	0.482112	0.488251	0.464905	0.478814	0.476131	0.497072	0.472912	0.483556	0.467226	0.465843	0.476589	0.475165	0.477986	0.483656	0.499658	0.510169	0.524946	0.553147	0.634903	0.847876	0.987984	0.972814	0.99411	1.00383	1.01756	1.0585
0.950963	0.816776	0.700901	0.694157	0.724281	0.663301	0.659311	0.614317	0.572073	0.61159	0.567847	0.577561	0.53384	0.501715	0.47872	0.567825	0.579225	0.570357	0.572056	0.56287	0.564558	0.582015	0.598736	0.601085	0.648621	0.622986	0.601114	0.616713	0.64182	0.647502	0.674303	0.649523	0.582961	0.594197	0.612057	0.601351	0.660799	0.603664	0.619413	0.607479	0.667711	0.679095	0.688099	0.743434	0.720231	0.730774	0.747315	0.744337	0.752451	0.786104
0.987063	0.854079	0.831913	0.743997	0.807764	0.783117	0.758905	0.7579	0.66653	0.664368	0.634019	0.602083	0.574079	0.565382	0.56841	0.484882	0.470961	0.460308	0.443168	0.441219	0.445367	0.438598	0.454768	0.468031	0.456478	0.47828	0.422297	0.457517	0.454531	0.397463	0.397696	0.43869	0.389881	0.386315	0.398113	0.435689	0.51558	0.573725	0.737789	0.866847	0.989975	1.08934	1.19536	1.23818	1.35437	1.26839	1.29857	1.35588	1.36463	1.26461
0.669361	0.546376	0.489286	0.414364	0.413708	0.396419	0.398464	0.342368	0.345282	0.360686	0.330524	0.329929	0.336588	0.325734	0.337634	0.345006	0.347229	0.341569	0.34603	0.328354	0.323633	0.336901	0.339017	0.332902	0.352041	0.359662	0.400599	0.391452	0.404651	0.399891	0.395314	0.415009	0.39725	0.38999	0.392052	0.393098	0.39419	0.38946	0.396881	0.406048	0.406509	0.399342	0.392358	0.41368	0.454148	0.572957	0.766408	0.892819	0.997943	1.07497
0.820881	0.75304	0.672408	0.67368	0.605557	0.549334	0.549963	0.492207	0.424917	0.464923	0.450417	0.441208	0.486905	0.446842	0.445954	0.418778	0.4459	0.432325	0.418011	0.44906	0.411999	0.402196	0.404857	0.41116	0.420551	0.403055	0.407598	0.41238	0.412515	0.492424	0.484065	0.542443	0.541839	0.531065	0.526747	0.569055	0.616806	0.767512	1.09438	1.26657	1.30731	1.29505	1.37456	1.45249	1.47386	1.25474	1.27332	1.318	1.25566	1.27663
0.864061	0.938877	0.853306	0.815129	0.692687	0.653837	0.641108	0.51473	0.518527	0.521419	0.483485	0.482482	0.478252	0.47891	0.48099	0.494209	0.488955	0.477784	0.494052	0.471049	0.47489	0.447811	0.421097	0.409068	0.410429	0.395084	0.404313	0.375924	0.425412	0.436024	0.466651	0.556894	0.915375	1.14928	1.19046	1.27272	1.13766	1.2053	1.16341	1.18739	1.18338	1.19012	1.08453	1.13502	1.36037	1.50453	1.39652	1.36807	1.24752	1.33264
0.949945	0.910703	0.834207	0.780465	0.722761	0.786705	0.721481	0.733637	0.681557	0.742543	0.737748	0.722705	0.73441	0.69002	0.642735	0.636256	0.596478	0.650819	0.640518	0.534446	0.572036	0.538751	0.536218	0.531531	0.48368	0.4829	0.454514	0.490771	0.502874	0.480548	0.456527	0.466381	0.425042	0.433361	0.450961	0.42968	0.434963	0.489102	0.440784	0.486179	0.489941	0.492586	0.498628	0.531455	0.632306	0.731912	1.03168	1.22105	1.23669	1.26146
		0.94809	0.944498	0.779946	0.800359	0.748209	0.735638	0.729073	0.730853	0.700703	0.640084	0.70672	0.775093	0.802188	0.717797	0.700166	0.687889	0.637794	0.655296	0.70789	0.675834	0.712655	0.716158	0.69271	0.628214	0.55637	0.572912	0.613183	0.566992	0.581631	0.631261	0.703516	0.94725	1.09732	1.23802	1.38189	1.4324	1.54397	1.40327	1.38675	1.23426	1.26501	1.23671	1.2296	1.24736	1.23477	1.28551	1.22552	1.24159
0.842794	0.825569	0.909457	0.905723	0.824853	0.868207	0.828787	0.877778	0.772208	0.773019	0.797816	0.749523	0.650398	0.665201	0.630138	0.58126	0.616263	0.617552	0.638077	0.588706	0.510717	0.482132	0.431033	0.450431	0.38407	0.401825	0.436264	0.435743	0.417553	0.426653	0.443079	0.482568	0.500359	0.517284	0.498973	0.44819	0.44683	0.457304	0.469076	0.465967	0.476397	0.497189	0.654202	0.942359	0.942479	1.03735	0.994507	1.0742	1.02454	0.995784
0.756956	0.702289	0.636669	0.624987	0.624392	0.563671	0.593093	0.583064	0.585189	0.620254	0.611237	0.655223	0.58518	0.667804	0.598765	0.61146	0.589854	0.591333	0.595963	0.690638	0.708352	0.656988	0.649014	0.665053	0.716181	0.652661	0.662477	0.723696	0.765017	0.856983	0.924552	0.98882	1.08796	1.15501	1.21044	1.3864	1.19985	1.15173	1.1847	1.17815	1.18015	1.23393	1.19631	1.17757	1.156	1.21816	1.16804	1.14225	1.1186	1.1325
0.782377	0.815447	0.766442	0.792665	0.73963	0.735947	0.718481	0.740938	0.727442	0.793067	0.7184	0.688758	0.656725	0.654028	0.626156	0.602587	0.569316	0.557043	0.571257	0.570618	0.521399	0.55828	0.532627	0.509524	0.517485	0.498676	0.525357	0.522689	0.525717	0.508965	0.50525	0.494749	0.570313	0.709262	1.04383	1.1488	1.19205	1.06245	1.13846	1.10807	1.1679	1.17397	1.20977	1.23385	1.14789	1.16156	1.20497	1.22266	1.271	1.36961
						0.815808	0.767602	0.744715	0.661822	0.554894	0.575599	0.56146	0.511599	0.543168	0.514001	0.503127	0.50246	0.471318	0.445986	0.431806	0.437142	0.421338	0.408012	0.411223	0.41676	0.43458	0.461161	0.453136	0.457073	0.459724	0.453228	0.440129	0.442124	0.462288	0.486047	0.520166	0.610534	0.741694	0.928279	1.0657	1.01345	1.05616	1.11564	1.18699	1.27494	1.32736	1.25291	1.16018	1.2562
																	0.758706	0.686844	0.779583	0.740035	0.72839	0.826833	0.772688	0.691557	0.748255	0.812874	0.751594	0.750667	0.80661	0.799762	0.853334	0.838538	0.834546	0.824353	0.807651	0.778118	0.856513	0.753177	0.902302	0.811969	0.798117	0.791812	0.771105	0.772334	0.726093	0.67491	0.730848	0.660738	0.839581
0.641923	0.650281	0.690924	0.660806	0.669345	0.644965	0.584404	0.541771	0.524514	0.49938	0.455863	0.430438	0.452436	0.403379	0.371733	0.377008	0.369122	0.359591	0.348334	0.338957	0.335917	0.326287	0.332998	0.334113	0.340358	0.346871	0.357321	0.335602	0.346164	0.351225	0.3724	0.403794	0.455047	0.540143	0.88903	1.01014	1.04873	1.01172	1.04274	1.03078	1.13833	1.25045	1.35962	1.31186	1.20112	1.00982	1.02935	1.14543	1.31664	1.4775
0.647056	0.620932	0.58463	0.601195	0.644438	0.606372	0.718993	0.649872	0.649516	0.585785	0.604966	0.567419	0.592378	0.572391	0.603316	0.563059	0.554835	0.547626	0.580741	0.563864	0.540583	0.530847	0.542527	0.493622	0.485699	0.474155	0.490927	0.468326	0.481879	0.477557	0.562112	0.548626	0.605063	0.613379	0.596452	0.62548	0.728983	0.760434	0.842893	0.925733	0.948591	0.973681	1.03066	1.05669	1.13457	1.13186	1.10073	1.08649	1.16749	1.16734
0.877628	0.865759	0.757819	0.693651	0.587275	0.569351	0.61638	0.523082	0.47171	0.466041	0.432197	0.396714	0.357025	0.367987	0.365803	0.35892	0.385006	0.357112	0.36327	0.397086	0.388637	0.406265	0.369971	0.352678	0.350985	0.317831	0.327243	0.292886	0.28101	0.272282	0.2806	0.28204	0.297349	0.28393	0.298055	0.290088	0.296585	0.309339	0.300005	0.28935	0.282247	0.276084	0.300332	0.281592	0.290919	0.304729	0.32522	0.365455	0.556151	0.803577
	0.869724	0.827526	0.828612	0.825439	0.792608	0.756554	0.741451	0.594284	0.548369	0.518937	0.561645	0.521679	0.520143	0.547152	0.535731	0.517324	0.525452	0.472064	0.47395	0.50214	0.502595	0.493033	0.48785	0.480715	0.475634	0.482294	0.450702	0.420854	0.423906	0.435923	0.419485	0.449421	0.454504	0.445539	0.443502	0.451203	0.444976	0.480654	0.503141	0.557199	0.615932	0.952116	1.09056	1.13907	1.27	1.16884	1.20322	1.278	1.30624
				1.0001	0.913342	0.908025	0.917616	0.805729	0.780116	0.754324	0.732649	0.711961	0.702558	0.712253	0.605776	0.59027	0.584601	0.641172	0.622027	0.638881	0.610609	0.589135	0.635098	0.677599	0.592546	0.57028	0.529036	0.570277	0.543135	0.544578	0.538982	0.582805	0.628212	0.740809	0.806792	0.848534	0.783478	0.703766	0.824674	0.940877	1.07076	0.939336	0.885748	0.881424	0.855323	0.953668	0.974047	1.02044	1.03385
0.867723	0.784612	0.673713	0.640493	0.613866	0.52923	0.518492	0.498448	0.496867	0.510319	0.512725	0.472474	0.430964	0.40251	0.374297	0.377276	0.343119	0.326278	0.325101	0.328956	0.330536	0.321985	0.333244	0.307452	0.301108	0.314158	0.3247	0.347424	0.344417	0.395019	0.370675	0.407406	0.455623	0.441812	0.417714	0.401769	0.396985	0.421074	0.370041	0.362089	0.411553	0.550314	0.774497	0.983935	1.04157	1.02696	1.09687	1.07494	1.03601	1.08272
0.812673	0.712888	0.646488	0.594897	0.512386	0.469769	0.470291	0.484638	0.551895	0.486992	0.551207	0.561516	0.533071	0.474801	0.474292	0.453966	0.433113	0.427982	0.440169	0.405596	0.390214	0.3833	0.352961	0.354268	0.32607	0.32411	0.330761	0.321152	0.342718	0.376652	0.418178	0.465661	0.451961	0.480924	0.490504	0.471666	0.509121	0.501341	0.483278	0.484037	0.522441	0.613908	0.792411	0.921404	0.971352	0.986148	0.995808	0.995921	1.04647	1.0931
0.799174	0.745246	0.711433	0.711272	0.758879	0.748082	0.761765	0.765374	0.770858	0.749835	0.839398	0.762053	0.733824	0.684899	0.693457	0.667777	0.666288	0.672245	0.673511	0.635901	0.662862	0.632307	0.678169	0.648733	0.67287	0.658316	0.618813	0.627389	0.616349	0.631395	0.65088	0.661223	0.664587	0.704577	0.744198	0.811233	0.750725	0.710286	0.720984	0.750275	0.806079	0.854519	0.819693	0.920197	1.11839	1.17364	1.29964	1.36329	1.38237	1.54572
0.736234	0.670701	0.564286	0.500623	0.519406	0.505258	0.455688	0.513806	0.479772	0.475913	0.493406	0.486548	0.468963	0.468399	0.439721	0.439475	0.428907	0.377141	0.398976	0.408367	0.377021	0.330756	0.335662	0.33214	0.332192	0.320809	0.320619	0.328187	0.332175	0.349993	0.356738	0.373244	0.39873	0.387151	0.416352	0.442198	0.440689	0.473911	0.487322	0.536048	0.614156	0.920473	1.01403	1.12456	1.14445	1.15775	1.13543	1.11247	1.08033	1.049
																								0.356011	0.410282	0.42795	0.424009	0.442029	0.382489	0.354335	0.368176	0.361182	0.41835	0.469222	0.661052	0.919377	0.96418	1.00776	0.864728	0.913082	0.980677	0.974073	1.02131	1.15348	1.21877	1.23118	1.20042	1.31912	1.32148
																								0.623755	0.605605	0.640442	0.593126	0.608434	0.588482	0.616394	0.67056	0.667663	0.784162	0.765726	0.700503	0.789933	0.75923	0.693099	0.687412	0.818706	0.78972	0.851698	0.781714	0.800672	0.758035	0.834216	0.815534	0.915874	1.14333
																									0.562782	0.544849	0.556754	0.504137	0.513106	0.519946	0.459304	0.409827	0.395664	0.38037	0.404422	0.392562	0.361176	0.370441	0.388957	0.452346	0.477298	0.633289	0.595864	0.681599	0.767109	0.773473	0.915273	0.893586	1.02309
0.62278	0.665193	0.664345	0.604322	0.594321	0.556462	0.449769	0.393587	0.400444	0.337164	0.325792	0.269434	0.305679	0.320729	0.314699	0.334777	0.331008	0.333953	0.348982	0.35449	0.356491	0.386616	0.407756	0.435986	0.426369	0.434394	0.450647	0.450511	0.468476	0.500536	0.517551	0.53968	0.516879	0.528864	0.514379	0.530033	0.525268	0.57074	0.5751	0.581322	0.606196	0.652462	0.689796	0.748317	0.855733	0.925956	0.921862	0.998682	1.11037	1.23591
				0.797177	0.743703	0.692822	0.675291	0.749579	0.730385	0.675775	0.665871	0.6435	0.675051	0.673338	0.695194	0.675009	0.632224	0.641097	0.663436	0.661496	0.665961	0.635107	0.596762	0.566611	0.58817	0.569011	0.563448	0.529602	0.54806	0.548638	0.529911	0.513707	0.482527	0.496486	0.49423	0.504729	0.507895	0.512402	0.512986	0.50965	0.546372	0.607466	0.727148	1.11695	1.35259	1.48336	1.49888	1.45279	1.51683
																								0.642486	0.644452	0.621112	0.601552	0.653971	0.845972	0.944881	1.02241	1.17923	1.20947	1.24693	1.1774	1.09361	1.02229	1.04776	0.996945	1.00911	0.923876	0.849776	0.804307	0.758068	0.811017	0.914879	0.887022	0.958845	1.00679
0.945826	0.851073	0.84576	0.853503	0.96122	0.855966	0.862513	0.790786	0.774098	0.72379	0.779292	0.709038	0.727744	0.613815	0.627067	0.692743	0.654742	0.749179	0.638259	0.651169	0.67525	0.698664	0.699714	0.749391	0.677925	0.694337	0.751244	0.814012	0.964991	1.09912	0.907857	0.912227	0.837051	0.810548	0.745491	0.707562	0.826363	0.881226	1.19379	1.32293	1.43487	1.45267	1.25133	1.01512	1.16707	1.1188	1.11749	1.02394	0.88998	0.976959
0.935559	0.84444	0.755893	0.697086	0.671335	0.622219	0.567103	0.525797	0.534033	0.540427	0.496897	0.492023	0.455986	0.425603	0.401207	0.419565	0.418551	0.433644	0.473625	0.437044	0.423733	0.442003	0.44022	0.470078	0.487024	0.443473	0.492115	0.568755	0.515694	0.589112	0.664986	0.684551	0.660181	0.603092	0.64667	0.619947	0.675974	0.725775	0.714268	0.77079	0.802628	0.866394	0.936602	0.919959	0.990853	1.05776	1.1241	1.10461	1.13733	1.17088
0.462398	0.435656	0.436255	0.404158	0.347329	0.413705	0.407764	0.364137	0.433468	0.375843	0.425299	0.395612	0.382185	0.382202	0.40363	0.414702	0.395358	0.402826	0.412657	0.392343	0.362109	0.402773	0.449586	0.402477	0.372504	0.389927	0.359788	0.324738	0.288362	0.256381	0.295531	0.287298	0.2859	0.317715	0.336639	0.35498	0.350899	0.369047	0.453103	0.533475	0.57545	0.707237	0.823234	0.835889	0.878316	1.03274	1.11135	1.13427	1.14623	1.18563
0.575448	0.551382	0.576037	0.588704	0.641819	0.646504	0.587087	0.485841	0.466425	0.378518	0.385573	0.425328	0.444651	0.471436	0.444633	0.424036	0.408946	0.408476	0.384954	0.440499	0.436994	0.428565	0.3817	0.422184	0.390482	0.400616	0.416938	0.383534	0.379925	0.389347	0.399526	0.388704	0.399025	0.414759	0.461501	0.638923	0.948512	1.03442	1.08009	1.03894	1.04596	1.02547	1.08762	1.07329	1.07438	1.07137	1.06439	1.17212	1.23335	1.27891
0.768135	0.677773	0.662224	0.598447	0.569751	0.573316	0.603511	0.6147	0.604891	0.567106	0.503795	0.494387	0.47294	0.477256	0.498179	0.511473	0.525652	0.558516	0.531119	0.514019	0.545984	0.536704	0.571669	0.571545	0.558655	0.569255	0.582738	0.583596	0.586193	0.65408	0.6168	0.638199	0.615168	0.597424	0.58756	0.596338	0.622618	0.673312	0.776728	0.891444	1.00997	1.12857	1.13805	1.16637	1.28611	1.25324	1.24666	1.25249	1.16264	1.23254
0.398036	0.421682	0.446392	0.394801	0.463136	0.530278	0.568374	0.584214	0.606151	0.601399	0.654444	0.610736	0.585378	0.548133	0.503726	0.533456	0.51147	0.521557	0.497763	0.452502	0.41866	0.439856	0.416999	0.425952	0.395685	0.438339	0.465764	0.476753	0.499997	0.456463	0.427466	0.44369	0.45046	0.462484	0.415334	0.4115	0.42968	0.455083	0.435134	0.472545	0.609122	0.869477	0.948336	0.869743	0.864522	1.00611	1.15057	1.1732	1.14539	1.10314
0.683748	0.66778	0.667482	0.670141	0.623744	0.620612	0.635608	0.597618	0.605008	0.601144	0.608384	0.5876	0.606171	0.597878	0.608497	0.620557	0.614092	0.576463	0.591333	0.599095	0.639284	0.612122	0.579452	0.572746	0.605317	0.582134	0.603708	0.575832	0.567167	0.633495	0.584519	0.579475	0.617506	0.599174	0.574897	0.591066	0.617868	0.651538	0.702054	0.790776	0.899304	0.9396	0.945341	0.87376	0.978407	1.08562	1.08174	1.18538	1.24041	1.21342
0.867081	0.782525	0.80472	0.844941	0.745756	0.806593	0.691329	0.733078	0.716164	0.659763	0.619064	0.612464	0.557853	0.5445	0.546569	0.534822	0.523115	0.550249	0.530406	0.542876	0.536507	0.556784	0.579372	0.524097	0.556278	0.535367	0.520696	0.491316	0.495895	0.504548	0.548093	0.618516	0.877134	1.0997	1.21206	1.24937	1.25146	1.28849	1.1453	1.09077	1.15264	1.24673	1.29518	1.22094	1.26602	1.09084	1.10667	1.16835	1.20781	1.26113
0.502985	0.526638	0.481872	0.423652	0.427015	0.405391	0.344609	0.331112	0.32362	0.300286	0.321131	0.308467	0.304796	0.324069	0.307961	0.342262	0.354386	0.391536	0.383167	0.385777	0.395997	0.426844	0.398359	0.408884	0.429732	0.39704	0.408052	0.361079	0.358083	0.372737	0.398406	0.450743	0.528755	0.659807	0.799909	0.859516	0.925658	1.05013	1.01222	1.05468	1.03971	1.12217	1.16134	1.11252	1.1169	1.04063	1.01521	1.07168	1.11942	1.17735
		0.907377	0.802184	0.747634	0.6693	0.634081	0.648277	0.604002	0.613749	0.645613	0.651095	0.644251	0.61886	0.588796	0.613852	0.622243	0.572175	0.583361	0.581752	0.591911	0.621253	0.598554	0.596217	0.57015	0.610828	0.569052	0.633433	0.581063	0.567369	0.523333	0.509908	0.526832	0.527886	0.552592	0.588673	0.634735	0.645486	0.643493	0.667151	0.641599	0.672788	0.695609	0.726407	0.80005	0.877373	0.960758	1.05632	1.12719	1.16863
										0.778471	0.600459	0.587678	0.581173	0.535953	0.527435	0.493922	0.496022	0.483421	0.430092	0.407506	0.400678	0.407743	0.366525	0.417795	0.39164	0.390882	0.395116	0.390762	0.430034	0.390343	0.386355	0.429506	0.430011	0.449745	0.468121	0.494999	0.546237	0.610816	0.764341	0.825158	0.920415	0.984556	0.997636	1.22044	1.20354	1.22523	1.17613	1.2306	1.2767
												0.656532	0.630941	0.601831	0.568775	0.545207	0.557162	0.506672	0.519514	0.564342	0.579119	0.57074	0.564388	0.581277	0.579899	0.561158	0.541517	0.569352	0.587064	0.540495	0.591575	0.545431	0.527007	0.585717	0.530322	0.511761	0.512703	0.494394	0.523643	0.500376	0.514839	0.542609	0.58005	0.624606	0.704175	0.792224	0.96325	1.03464	1.09065
																0.459794	0.448836	0.435346	0.435812	0.491619	0.463943	0.521544	0.538961	0.557097	0.543233	0.597786	0.577533	0.56606	0.56168	0.534205	0.563311	0.551752	0.526937	0.513906	0.495072	0.509207	0.532173	0.558099	0.725493	0.948397	1.12338	1.24266	1.27224	1.23098	1.23446	0.972256	1.04428	1.06541	0.989461
0.885348	0.823705	0.781097	0.836369	0.73285	0.622442	0.629342	0.613525	0.629285	0.572918	0.604013	0.559784	0.591593	0.572165	0.553316	0.568572	0.566763	0.584189	0.635456	0.590666	0.609238	0.577473	0.62012	0.609646	0.624585	0.644242	0.631312	0.615881	0.623351	0.588447	0.61726	0.66147	0.666989	0.67531	0.846986	1.08639	1.21224	1.2368	1.30506	1.19825	1.29029	1.26153	1.32734	1.34167	1.4164	1.43766	1.29695	1.30483	1.31483	1.3832
0.845122	0.793207	0.786193	0.68539	0.664358	0.594771	0.532359	0.536583	0.480738	0.539625	0.535787	0.581946	0.571457	0.545614	0.52998	0.560147	0.549934	0.581611	0.633477	0.600646	0.622103	0.613416	0.627101	0.633532	0.656148	0.648679	0.668366	0.6484	0.685496	0.683332	0.728149	0.709223	0.746612	0.734396	0.831842	0.797125	0.768353	0.676982	0.677788	0.702639	0.754654	0.815617	1.03057	1.30835	1.28245	1.14457	1.11351	1.04754	1.05265	1.06736
0.789131	0.750465	0.685888	0.58492	0.667003	0.523996	0.509785	0.560303	0.582591	0.633667	0.657135	0.688178	0.632685	0.538336	0.485991	0.485232	0.476056	0.467488	0.427663	0.443946	0.449238	0.437023	0.42629	0.435009	0.432412	0.434014	0.402449	0.36369	0.341128	0.32174	0.337421	0.281128	0.296291	0.287493	0.282418	0.283608	0.265315	0.276919	0.290511	0.295747	0.317267	0.444274	0.842198	0.948661	1.03148	1.02051	1.01322	1.03522	1.10943	1.12616
0.904534	0.906322	0.89013	0.752574	0.753886	0.701022	0.730613	0.743516	0.75217	0.749072	0.721601	0.721205	0.695763	0.748351	0.647806	0.637764	0.650092	0.60051	0.591068	0.548302	0.578224	0.480747	0.501169	0.533924	0.538741	0.490704	0.503751	0.505041	0.478786	0.472345	0.488733	0.50132	0.487139	0.469225	0.43126	0.43735	0.452509	0.535406	1.03076	1.22227	1.23145	1.30515	1.42051	1.44295	1.40133	1.49049	1.4389	1.48533	1.5767	1.55371
0.93838	0.885783	0.874442	0.839748	0.785074	0.726508	0.683621	0.643523	0.60599	0.644623	0.661883	0.707268	0.65517	0.595592	0.602377	0.595528	0.6779	0.613839	0.669182	0.688519	0.67402	0.695509	0.674591	0.639496	0.642369	0.581869	0.574978	0.651534	0.599869	0.673186	0.658792	0.661955	0.617448	0.614628	0.644481	0.709247	0.704833	0.712763	0.653756	0.598771	0.642881	0.694829	0.781197	0.887948	0.999239	0.97634	1.08764	1.22153	1.17987	1.29266
0.488147	0.430034	0.487551	0.50323	0.572006	0.550555	0.663239	0.663843	0.622884	0.589895	0.558779	0.485378	0.491162	0.468507	0.466014	0.53634	0.46871	0.463544	0.462227	0.461538	0.449647	0.459281	0.436808	0.438405	0.490356	0.438248	0.461721	0.469749	0.432661	0.468912	0.526993	0.63173	0.896519	1.18391	1.22955	1.25705	1.25949	1.35343	1.329	1.12031	1.25653	1.18685	1.26255	1.24521	1.32919	1.49043	1.27868	1.31068	1.36504	1.48587
0.725272	0.701919	0.771186	0.810822	0.750149	0.706684	0.728308	0.689182	0.648543	0.6574	0.576417	0.567124	0.575053	0.488909	0.483391	0.487334	0.472478	0.517701	0.503341	0.48388	0.504438	0.495283	0.493204	0.482893	0.492636	0.474273	0.492166	0.427447	0.408604	0.426223	0.477848	0.536754	0.615764	0.7623	0.901952	1.05475	1.14148	1.16702	1.10581	1.02908	1.06787	1.14265	1.09162	1.12223	1.1835	1.21726	1.24655	1.34241	1.38385	1.42678
[truncated: 25 more columns]

## Sheet: Ribociclib_G1 (CDK2)
Time since mitogen stimulation (hr)
0.2	0.4	0.6	0.8	1	1.2	1.4	1.6	1.8	2	2.2	2.4	2.6	2.8	3	3.2	3.4	3.6	3.8	4	4.2	4.4	4.6	4.8	5	5.2	5.4	5.6	5.8	6	6.2	6.4	6.6	6.8	7	7.2	7.4	7.6	7.8	8	8.2	8.4	8.6	8.8	9	9.2	9.4	9.6	9.8	10
0.4515	0.483571	0.501484	0.545123	0.479419	0.457193	0.485729	0.489238	0.485638	0.495491	0.468012	0.484151	0.465811	0.452171	0.452102	0.439569	0.437465	0.425742	0.422782	0.416287	0.387236	0.378964	0.322161	0.312404	0.269845	0.257953	0.252433	0.2474	0.267247	0.255752	0.264998	0.254932	0.25986	0.267814	0.286204	0.265599	0.268897	0.276568	0.289792	0.318683	0.31052	0.31436	0.309262	0.329411	0.312615	0.327473	0.320152	0.340107	0.361728	0.395098
0.59512	0.590498	0.614576	0.59615	0.607559	0.614924	0.588941	0.57343	0.548065	0.531096	0.535875	0.554471	0.572655	0.557546	0.5559	0.501445	0.512472	0.51244	0.500581	0.482851	0.48422	0.490929	0.485339	0.493316	0.479851	0.482287	0.447982	0.448757	0.472561	0.467953	0.457962	0.464075	0.445763	0.441695	0.470282	0.478519	0.459326	0.452435	0.437296	0.440624	0.428496	0.429299	0.423516	0.431725	0.472811	0.468526	0.450231	0.449127	0.461413	0.481885
0.51782	0.489204	0.507455	0.467594	0.433755	0.451021	0.437451	0.419704	0.405096	0.378008	0.372311	0.361379	0.357189	0.356528	0.347184	0.355609	0.362714	0.349268	0.345458	0.354236	0.35898	0.361557	0.355992	0.354826	0.350374	0.351753	0.340496	0.336877	0.334605	0.345956	0.323869	0.326937	0.332041	0.32283	0.295196	0.287275	0.275667	0.273734	0.275673	0.280237	0.290051	0.285775	0.292476	0.275687	0.275987	0.288758	0.335934	0.399729	0.440303	0.492255
0.594462	0.578855	0.52562	0.477552	0.462618	0.439706	0.424524	0.447452	0.426267	0.399017	0.401507	0.397259	0.391059	0.38989	0.383606	0.406653	0.396679	0.39828	0.397714	0.379479	0.380869	0.384324	0.38403	0.373358	0.380728	0.372027	0.374726	0.361078	0.374606	0.384991	0.389542	0.377915	0.376891	0.359968	0.341832	0.341069	0.336671	0.331982	0.344601	0.364666	0.361796	0.358707	0.373905	0.387678	0.417037	0.492035	0.569479	0.641872	0.720167	0.766633
										0.515021	0.528725	0.501045	0.485589	0.501875	0.511663	0.499492	0.481303	0.471386	0.460619	0.473725	0.45699	0.467401	0.443396	0.45452	0.465856	0.480615	0.467249	0.451488	0.432783	0.429648	0.438489	0.42961	0.436626	0.414389	0.416952	0.409888	0.401794	0.398635	0.417117	0.462762	0.456715	0.467904	0.499576	0.530755	0.533783	0.534513	0.554525	0.602832	0.608503
																	0.382859	0.369242	0.339963	0.340172	0.336098	0.334157	0.340519	0.337381	0.34234	0.312367	0.300555	0.286864	0.297525	0.295187	0.295509	0.284495	0.283602	0.284494	0.296855	0.279965	0.294499	0.28972	0.317486	0.321649	0.32678	0.320794	0.328162	0.387372	0.417575	0.452572	0.528788	0.582208	0.606551
																					0.57975	0.500177	0.474954	0.489217	0.455221	0.467753	0.437433	0.452379	0.433337	0.43305	0.434911	0.379077	0.360809	0.353744	0.345116	0.367622	0.372599	0.38812	0.393506	0.408886	0.401082	0.448372	0.429088	0.447155	0.459809	0.469735	0.506324	0.539244	0.560712
																								0.535528	0.534643	0.508025	0.496711	0.507639	0.532364	0.529964	0.504063	0.530582	0.506689	0.483612	0.49166	0.490111	0.464954	0.445604	0.44235	0.460174	0.485981	0.501745	0.534702	0.530699	0.547513	0.588913	0.627787	0.680769	0.721814
0.589835	0.618474	0.640531	0.625293	0.677133	0.567637	0.541121	0.523234	0.489216	0.471357	0.476981	0.527254	0.511443	0.486912	0.502446	0.447143	0.451851	0.432648	0.452038	0.408886	0.453972	0.427785	0.441056	0.441084	0.411028	0.408026	0.401883	0.414948	0.401379	0.373471	0.372493	0.374528	0.393722	0.392886	0.379342	0.406105	0.427467	0.421065	0.423724	0.444356	0.449706	0.474458	0.503281	0.541556	0.602269	0.678152	0.749778	0.759403	0.833858	0.886783
0.596707	0.653087	0.59351	0.564183	0.582104	0.554423	0.535915	0.525218	0.538881	0.497904	0.491434	0.477105	0.49136	0.492435	0.530737	0.533397	0.518521	0.529114	0.552487	0.537863	0.562072	0.572331	0.521925	0.541161	0.56206	0.537167	0.534718	0.500452	0.50557	0.498507	0.469509	0.461084	0.453499	0.455106	0.469387	0.484053	0.480061	0.466758	0.487264	0.502285	0.483788	0.498898	0.436903	0.442746	0.446215	0.429027	0.445188	0.429443	0.418659	0.418166
																0.539609	0.491665	0.50331	0.4988	0.480724	0.461876	0.44819	0.438903	0.426332	0.420971	0.396265	0.390819	0.395088	0.385857	0.381134	0.376849	0.369032	0.362235	0.356638	0.361703	0.368914	0.358236	0.362758	0.357942	0.371301	0.384398	0.398905	0.393424	0.416913	0.416576	0.424991	0.43422	0.452132	0.505353
0.53107	0.516532	0.494387	0.47878	0.505146	0.580014	0.607656	0.577251	0.548704	0.511518	0.500531	0.47715	0.46355	0.455791	0.440995	0.41134	0.406357	0.386445	0.395633	0.399383	0.387576	0.395925	0.402869	0.399534	0.405949	0.403195	0.398828	0.390312	0.377482	0.360754	0.363193	0.365433	0.385796	0.384841	0.377246	0.379694	0.372212	0.378949	0.392568	0.395156	0.396408	0.402216	0.416493	0.437355	0.44593	0.464039	0.460397	0.463233	0.480316	0.493854
0.45276	0.447061	0.456878	0.458802	0.457119	0.51533	0.521753	0.498283	0.451781	0.45243	0.450587	0.43512	0.431636	0.426478	0.432269	0.439304	0.423025	0.410706	0.424494	0.42623	0.405275	0.396929	0.408263	0.407874	0.43242	0.414476	0.425974	0.395915	0.431314	0.388941	0.384449	0.3818	0.344995	0.326061	0.331642	0.326356	0.345503	0.346033	0.346271	0.338493	0.334603	0.338411	0.355257	0.347212	0.367373	0.367248	0.409706	0.448563	0.483419	0.560804
0.504558	0.511654	0.525011	0.495519	0.4816	0.462725	0.466326	0.46483	0.438079	0.437612	0.441702	0.434463	0.425655	0.392244	0.382676	0.371849	0.35401	0.328122	0.320312	0.294056	0.289671	0.303312	0.324485	0.35536	0.305451	0.271474	0.285547	0.302213	0.307999	0.312262	0.318212	0.3079	0.31356	0.304613	0.328151	0.320603	0.304354	0.294352	0.290133	0.277447	0.287456	0.292093	0.295319	0.291275	0.30637	0.285035	0.285058	0.332216	0.348848	0.388732
0.577363	0.585498	0.567819	0.580262	0.570521	0.551491	0.562556	0.6081	0.556482	0.527589	0.517365	0.51642	0.508305	0.51762	0.527952	0.521192	0.50779	0.532791	0.539766	0.515174	0.504663	0.506976	0.476676	0.46175	0.467486	0.446765	0.423921	0.401941	0.394077	0.393678	0.368273	0.372842	0.376816	0.347757	0.357643	0.348673	0.339754	0.356799	0.35483	0.364063	0.362853	0.378799	0.389042	0.398811	0.409343	0.40355	0.416822	0.448583	0.469453	0.490198
0.546354	0.538793	0.502686	0.493716	0.503638	0.513867	0.51726	0.498335	0.506189	0.493359	0.462725	0.450985	0.425675	0.41749	0.427096	0.427655	0.403562	0.400579	0.411277	0.398741	0.390971	0.369777	0.415707	0.463901	0.406897	0.419541	0.428518	0.436502	0.432454	0.468771	0.456856	0.449448	0.470694	0.43402	0.445982	0.45617	0.474549	0.464578	0.45894	0.466126	0.458448	0.456572	0.455139	0.470044	0.451905	0.454122	0.461495	0.487687	0.492196	0.506678
0.498244	0.518981	0.5148	0.499678	0.52656	0.540414	0.523249	0.505027	0.503825	0.495042	0.492024	0.473868	0.469095	0.478331	0.469526	0.473083	0.478579	0.478209	0.477023	0.463535	0.462426	0.44032	0.436071	0.441022	0.441535	0.436963	0.448099	0.428348	0.433153	0.411847	0.426441	0.407901	0.446377	0.431322	0.429606	0.429064	0.414536	0.416124	0.410045	0.406701	0.402095	0.423155	0.434118	0.438377	0.509448	0.523271	0.552952	0.591462	0.652691	0.692686
0.599471	0.574038	0.592606	0.56432	0.567929	0.554118	0.548369	0.560587	0.545318	0.533784	0.543919	0.54026	0.563127	0.545062	0.554211	0.55123	0.549707	0.558357	0.563221	0.534723	0.523701	0.507999	0.509944	0.507617	0.496074	0.485247	0.471176	0.49057	0.472216	0.457668	0.454094	0.44169	0.427671	0.417646	0.424701	0.411839	0.413884	0.404238	0.408675	0.405261	0.413685	0.406322	0.383965	0.374012	0.38327	0.373528	0.392577	0.41178	0.417886	0.43152
0.548686	0.561258	0.566428	0.60621	0.55815	0.564187	0.542266	0.479649	0.461942	0.421616	0.400263	0.372706	0.359214	0.361292	0.353033	0.319547	0.308967	0.306141	0.320542	0.315789	0.330885	0.336485	0.3542	0.34614	0.35791	0.353321	0.377212	0.369933	0.371727	0.353677	0.362496	0.354419	0.369361	0.351848	0.350253	0.336267	0.328806	0.322415	0.30768	0.261706	0.268254	0.276242	0.276615	0.302122	0.323812	0.349559	0.358134	0.399166	0.458779	0.486341
0.53344	0.528544	0.549734	0.530187	0.530916	0.512137	0.515849	0.504479	0.490648	0.485188	0.48256	0.46599	0.457873	0.436177	0.394862	0.364879	0.376944	0.34103	0.325286	0.304317	0.306481	0.307929	0.331427	0.319402	0.318434	0.321618	0.371997	0.339129	0.363104	0.350411	0.340788	0.321457	0.343582	0.324687	0.337756	0.335023	0.343534	0.346048	0.354977	0.352854	0.3765	0.392137	0.40011	0.444536	0.488276	0.472113	0.532018	0.576894	0.588983	0.622479
0.461579	0.430716	0.404891	0.435409	0.455795	0.461401	0.484668	0.464093	0.456456	0.447207	0.448225	0.418702	0.427583	0.404026	0.375265	0.361627	0.367387	0.362753	0.370022	0.387356	0.380086	0.370096	0.380912	0.367509	0.370319	0.346961	0.349613	0.338622	0.333828	0.327254	0.323706	0.331044	0.341472	0.339683	0.332713	0.336325	0.3291	0.330351	0.331144	0.347463	0.331821	0.346392	0.359336	0.362042	0.374851	0.393601	0.4236	0.473275	0.540027	0.593977
0.567392	0.53363	0.516578	0.476306	0.511731	0.49797	0.517922	0.490807	0.453567	0.480646	0.501535	0.50842	0.501468	0.508794	0.470159	0.469207	0.476273	0.491424	0.463334	0.458412	0.459511	0.463053	0.453246	0.435076	0.421912	0.42665	0.409835	0.411778	0.404675	0.390902	0.364188	0.369654	0.370584	0.377316	0.382673	0.36697	0.384549	0.39045	0.411206	0.448354	0.454884	0.503708	0.523649	0.56459	0.610152	0.673942	0.718174	0.746923	0.742627	0.785029
0.492654	0.487373	0.500276	0.499739	0.512191	0.474951	0.466859	0.458305	0.462767	0.45775	0.477919	0.456756	0.45143	0.448281	0.440328	0.441104	0.434929	0.43163	0.434533	0.430658	0.437329	0.423772	0.430675	0.42207	0.397852	0.387824	0.388485	0.364806	0.369974	0.364122	0.355009	0.369885	0.376694	0.37574	0.373955	0.368419	0.387082	0.393492	0.395469	0.403153	0.400681	0.397103	0.386554	0.359778	0.355634	0.359466	0.387674	0.40151	0.428169	0.465836
0.592158	0.586262	0.552844	0.519954	0.504784	0.530901	0.532913	0.510128	0.467732	0.443599	0.447243	0.445654	0.409743	0.416848	0.42833	0.41999	0.390477	0.382931	0.366634	0.395436	0.386314	0.373406	0.367682	0.386505	0.378116	0.377324	0.389343	0.389432	0.388965	0.387376	0.403882	0.403896	0.389012	0.400141	0.409619	0.422356	0.414293	0.440461	0.454947	0.475767	0.487757	0.470861	0.474485	0.49716	0.508291	0.55952	0.594392	0.583379	0.570872	0.592423
0.502708	0.464763	0.435709	0.424492	0.447499	0.44862	0.486811	0.46889	0.478408	0.478229	0.496941	0.483219	0.497149	0.495673	0.480241	0.472735	0.460495	0.459806	0.459738	0.452303	0.464962	0.455293	0.463836	0.444981	0.432255	0.412848	0.43059	0.407431	0.394033	0.380229	0.377663	0.371094	0.382503	0.382444	0.374657	0.36584	0.356877	0.346586	0.355325	0.372216	0.383216	0.391565	0.385573	0.382718	0.403489	0.446395	0.485375	0.526077	0.580367	0.616443
0.52062	0.530754	0.523902	0.542761	0.548154	0.498695	0.487444	0.479648	0.472813	0.439335	0.4395	0.447438	0.409622	0.413434	0.383338	0.371678	0.356058	0.337756	0.327439	0.328305	0.322886	0.314938	0.317825	0.29153	0.276857	0.269229	0.299046	0.292448	0.320507	0.305522	0.317377	0.303298	0.3283	0.329694	0.327912	0.31688	0.320879	0.3097	0.31438	0.316305	0.311232	0.302131	0.310303	0.283705	0.292782	0.300589	0.352823	0.385369	0.45506	0.53266
																			0.276424	0.28252	0.294553	0.28324	0.280527	0.299723	0.268652	0.265971	0.278853	0.282146	0.298946	0.265319	0.273088	0.263936	0.277508	0.310951	0.323668	0.337986	0.351817	0.337253	0.356734	0.322096	0.359736	0.382204	0.434788	0.494351	0.530261	0.58365	0.637666	0.695255	0.758533
0.374766	0.370163	0.377596	0.377937	0.402373	0.409073	0.407012	0.413091	0.384237	0.393531	0.385711	0.361057	0.367162	0.357057	0.360799	0.370047	0.343295	0.347345	0.35242	0.348792	0.347681	0.333757	0.340809	0.33121	0.326386	0.326407	0.327159	0.342666	0.339376	0.335533	0.347255	0.355799	0.352805	0.365363	0.386286	0.384902	0.401091	0.408748	0.443585	0.48032	0.526845	0.576397	0.58997	0.641722	0.687158	0.741763	0.765366	0.823907	0.8923	0.915023
0.58664	0.549079	0.531906	0.486505	0.513055	0.505876	0.54167	0.537472	0.545843	0.532538	0.507159	0.49216	0.471036	0.467427	0.416495	0.405733	0.416452	0.421206	0.420086	0.391891	0.383036	0.385371	0.391712	0.377547	0.388905	0.395009	0.392878	0.395413	0.401515	0.399596	0.383003	0.378353	0.387327	0.372623	0.394936	0.389274	0.400135	0.401307	0.394214	0.401089	0.381266	0.38138	0.377964	0.377662	0.395726	0.419846	0.453498	0.458091	0.529793	0.565877
0.338705	0.351655	0.320338	0.328927	0.330068	0.378939	0.396537	0.37247	0.3836	0.40381	0.399901	0.387036	0.414916	0.407008	0.417313	0.423376	0.412193	0.406688	0.426815	0.4175	0.405425	0.409864	0.396261	0.412969	0.387312	0.369771	0.368018	0.373665	0.368728	0.374778	0.366725	0.341744	0.340554	0.341431	0.333392	0.313239	0.345329	0.328134	0.318902	0.306548	0.313298	0.319609	0.323143	0.31743	0.310199	0.319635	0.31297	0.314185	0.328711	0.357715
0.481039	0.449535	0.455124	0.445055	0.435578	0.472215	0.458386	0.458549	0.417662	0.409421	0.430052	0.403293	0.41338	0.393222	0.388293	0.360064	0.349384	0.331132	0.312849	0.294269	0.307628	0.295028	0.292306	0.292364	0.277943	0.281621	0.272903	0.270254	0.282485	0.293638	0.309097	0.31068	0.313755	0.337033	0.337849	0.358362	0.375613	0.358863	0.397369	0.37755	0.381132	0.409652	0.450176	0.490204	0.485912	0.528001	0.553713	0.591554	0.674366	0.676616
0.530935	0.547439	0.528603	0.509956	0.487346	0.495059	0.469102	0.462741	0.421243	0.42137	0.438361	0.441533	0.442171	0.43101	0.406702	0.407508	0.437864	0.445671	0.454387	0.439298	0.479135	0.447809	0.437848	0.424877	0.383545	0.379091	0.386295	0.395976	0.381792	0.361167	0.350695	0.343	0.37429	0.384672	0.383252	0.40328	0.414397	0.447463	0.525548	0.596992	0.682377	0.889331	0.949494	0.955966	0.980789	0.970863	0.918492	0.874204	0.865117	0.843953
0.495229	0.531572	0.532571	0.507956	0.502694	0.467501	0.45479	0.452566	0.454101	0.438568	0.46423	0.436754	0.446805	0.438293	0.443859	0.451729	0.441271	0.448468	0.465019	0.464859	0.458301	0.449336	0.454226	0.431838	0.416956	0.41516	0.40725	0.408578	0.391713	0.38858	0.379007	0.386131	0.385369	0.380181	0.379274	0.365335	0.383718	0.398239	0.39845	0.391985	0.39114	0.400898	0.381723	0.371951	0.368312	0.364682	0.366775	0.375605	0.399378	0.444999
0.518805	0.490457	0.502732	0.464862	0.456269	0.461184	0.432077	0.426799	0.419309	0.431181	0.405448	0.386744	0.409616	0.396735	0.415929	0.401389	0.405993	0.416008	0.404968	0.395922	0.425335	0.418226	0.413963	0.406349	0.425558	0.439066	0.401417	0.417028	0.404309	0.422705	0.415629	0.397323	0.379387	0.38326	0.394745	0.40251	0.416532	0.4215	0.440912	0.467309	0.510929	0.552976	0.594924	0.647374	0.70678	0.812571	0.857852	0.856804	0.857052	0.855111
0.558605	0.576726	0.565035	0.520616	0.486978	0.494944	0.482398	0.49362	0.48472	0.489349	0.482912	0.457065	0.429824	0.452483	0.4438	0.43576	0.418174	0.433627	0.410742	0.40708	0.39774	0.389552	0.399402	0.410366	0.419561	0.407016	0.392086	0.386605	0.37857	0.36884	0.376864	0.385516	0.390756	0.38731	0.400754	0.376516	0.362384	0.363101	0.353611	0.367086	0.351787	0.350863	0.368173	0.370647	0.37363	0.368316	0.391645	0.414184	0.451367	0.514063
0.563111	0.546256	0.537101	0.531393	0.52473	0.528144	0.499607	0.510721	0.491276	0.496881	0.494352	0.497579	0.511117	0.482717	0.480632	0.457072	0.456193	0.427129	0.416623	0.39962	0.385989	0.377447	0.387993	0.394668	0.383515	0.374909	0.356996	0.359796	0.343841	0.346463	0.343463	0.33707	0.329201	0.315926	0.322952	0.297842	0.317292	0.294069	0.2913	0.280489	0.290907	0.295261	0.31638	0.345259	0.372892	0.42077	0.457026	0.505647	0.562325	0.619334
0.563895	0.552577	0.531049	0.548894	0.539102	0.536889	0.568391	0.56712	0.556453	0.553316	0.533611	0.518933	0.511589	0.479477	0.501379	0.49838	0.471671	0.492052	0.476525	0.466102	0.453661	0.448071	0.442408	0.414846	0.416472	0.415237	0.414967	0.418814	0.431472	0.409656	0.420057	0.418603	0.415488	0.403438	0.385481	0.404062	0.441559	0.46444	0.554166	0.630176	0.704894	0.740734	0.805981	0.830726	0.831671	0.842567	0.844754	0.878041	0.899712	0.913994
												0.509733	0.506791	0.508092	0.494379	0.485363	0.477684	0.470778	0.43102	0.445523	0.440535	0.428397	0.420771	0.434868	0.445817	0.432478	0.426112	0.414054	0.406745	0.39625	0.384829	0.378793	0.391256	0.384869	0.384115	0.380074	0.380881	0.371226	0.382395	0.387934	0.381277	0.376912	0.372938	0.390204	0.414854	0.443114	0.520908	0.60343	0.658829
																								0.473931	0.483	0.463542	0.500797	0.466057	0.442124	0.429744	0.413499	0.415277	0.390966	0.369274	0.361528	0.373576	0.376838	0.375933	0.361334	0.344557	0.357699	0.392576	0.368869	0.392532	0.394356	0.409455	0.47223	0.537557	0.605372
0.502136	0.45868	0.474386	0.475051	0.518412	0.531737	0.51887	0.498853	0.494122	0.49028	0.500171	0.485618	0.498033	0.49047	0.492789	0.494649	0.46604	0.452656	0.460423	0.42046	0.407577	0.409477	0.391377	0.388211	0.362549	0.373927	0.349304	0.344964	0.352221	0.357839	0.358743	0.365441	0.356823	0.35694	0.361052	0.334826	0.351055	0.352959	0.362332	0.36515	0.388265	0.409866	0.462243	0.496735	0.55404	0.630231	0.711817	0.79235	0.83784	0.894452
0.568085	0.716815	0.653471	0.623042	0.614187	0.614072	0.651283	0.602225	0.596031	0.588264	0.629325	0.561035	0.558133	0.552815	0.542332	0.527295	0.507193	0.494517	0.511403	0.504397	0.487203	0.49782	0.490419	0.508396	0.487881	0.486816	0.508402	0.4857	0.491056	0.479074	0.472729	0.480453	0.453271	0.452939	0.412621	0.406256	0.399709	0.387992	0.411852	0.41231	0.424036	0.417541	0.402541	0.407166	0.42297	0.442782	0.461427	0.48432	0.498514	0.519296
0.520629	0.48596	0.472297	0.446303	0.435166	0.437778	0.434964	0.428525	0.42169	0.42154	0.429481	0.439373	0.432163	0.441968	0.437791	0.429585	0.457421	0.472778	0.496763	0.49281	0.482787	0.497438	0.480545	0.474011	0.482961	0.457129	0.452454	0.445046	0.445126	0.432302	0.421519	0.404061	0.39167	0.384587	0.385991	0.389742	0.379542	0.366618	0.377632	0.376	0.386306	0.386699	0.397447	0.393282	0.410846	0.415472	0.460644	0.480519	0.540472	0.65789
0.533994	0.544373	0.496234	0.499361	0.499955	0.502585	0.478666	0.466742	0.454525	0.458446	0.464186	0.454838	0.461057	0.470618	0.458568	0.46381	0.459808	0.45859	0.43505	0.438906	0.427608	0.424138	0.401385	0.396067	0.387712	0.395502	0.378753	0.38226	0.380436	0.3822	0.381068	0.386956	0.382142	0.368915	0.364725	0.364906	0.370492	0.352487	0.352814	0.35378	0.348441	0.339334	0.366361	0.40204	0.437925	0.48461	0.569648	0.646282	0.748434	0.832979
0.528032	0.535945	0.556824	0.529949	0.494914	0.503143	0.492562	0.467031	0.467685	0.535977	0.496477	0.491913	0.495869	0.487266	0.480321	0.458584	0.438681	0.410298	0.400057	0.404661	0.412822	0.391081	0.387431	0.374714	0.361016	0.360243	0.357879	0.363499	0.358051	0.360328	0.362084	0.360618	0.350892	0.36508	0.393195	0.372312	0.373335	0.369509	0.354387	0.364972	0.401246	0.434278	0.471602	0.526943	0.606694	0.66701	0.723272	0.744906	0.760205	0.767703
0.387227	0.392339	0.394237	0.380973	0.370703	0.364077	0.347583	0.345576	0.331629	0.326592	0.325506	0.319752	0.308828	0.302217	0.284203	0.29247	0.275156	0.28441	0.288854	0.290014	0.276572	0.273115	0.270922	0.270833	0.278545	0.279638	0.296336	0.279465	0.276179	0.274597	0.276757	0.270448	0.269724	0.265897	0.267721	0.272598	0.263309	0.264442	0.269518	0.270984	0.27465	0.280882	0.289534	0.314997	0.359184	0.441613	0.561421	0.668589	0.724435	0.763983
0.529033	0.570949	0.560816	0.608809	0.655114	0.624536	0.592596	0.564836	0.529456	0.511999	0.482522	0.477518	0.466683	0.445278	0.441955	0.436256	0.425312	0.43009	0.43926	0.403233	0.40334	0.395627	0.385146	0.372181	0.369424	0.356747	0.334412	0.33182	0.319918	0.309712	0.315028	0.33338	0.353857	0.378729	0.367628	0.379212	0.378512	0.382799	0.420107	0.438965	0.46004	0.500439	0.5291	0.596796	0.60325	0.64122	0.650344	0.678714	0.664466	0.707539
0.382143	0.418759	0.454523	0.470414	0.456716	0.477148	0.463711	0.444685	0.405112	0.398489	0.387792	0.377286	0.364615	0.363049	0.346336	0.320863	0.304795	0.295151	0.30903	0.314533	0.314858	0.319049	0.326422	0.32732	0.339877	0.342444	0.33666	0.329019	0.335898	0.345694	0.348503	0.333915	0.323494	0.275596	0.288936	0.284896	0.288785	0.305638	0.304216	0.296757	0.325319	0.325595	0.268401	0.282249	0.295348	0.311103	0.332756	0.409735	0.494768	0.60144
							0.715612	0.655375	0.682438	0.656999	0.59214	0.568666	0.536673	0.501898	0.474452	0.472986	0.479234	0.484507	0.46289	0.473528	0.461959	0.443496	0.436964	0.41282	0.4092	0.402017	0.389281	0.382151	0.385511	0.394049	0.387231	0.389468	0.384169	0.402448	0.401114	0.410718	0.413293	0.396076	0.379648	0.394806	0.404155	0.405926	0.402779	0.392938	0.380511	0.387399	0.413474	0.419019	0.455814
													0.559856	0.53547	0.540007	0.5286	0.512809	0.512842	0.504711	0.490623	0.50618	0.482303	0.478514	0.472488	0.480971	0.45928	0.459261	0.46891	0.461522	0.448984	0.455708	0.453298	0.455481	0.471323	0.468499	0.483508	0.475784	0.489075	0.507114	0.547331	0.565043	0.567099	0.607183	0.622696	0.676953	0.721073	0.754785	0.753195	0.814559
															0.502766	0.538222	0.580535	0.580546	0.586073	0.577524	0.548385	0.546491	0.536924	0.543106	0.522763	0.537532	0.497652	0.502417	0.493829	0.481824	0.484444	0.478558	0.496111	0.516147	0.515453	0.556223	0.504782	0.511013	0.530389	0.522124	0.549167	0.527023	0.51752	0.537342	0.548872	0.549766	0.583327	0.608512	0.648285
																		0.489594	0.443927	0.441997	0.444687	0.41397	0.412903	0.397225	0.377032	0.385245	0.368174	0.370727	0.369758	0.390769	0.392536	0.373967	0.365607	0.380212	0.403365	0.417355	0.418423	0.445532	0.469698	0.506094	0.545283	0.62031	0.601627	0.658886	0.67589	0.699903	0.721821	0.711437	0.731738
																					0.488973	0.500779	0.502441	0.491836	0.492797	0.478738	0.437341	0.429158	0.41022	0.411765	0.404565	0.393033	0.400716	0.414347	0.420787	0.408952	0.421474	0.42843	0.433017	0.426888	0.463891	0.472563	0.487411	0.496078	0.518182	0.563642	0.622006	0.645677	0.714307
0.557177	0.562451	0.573967	0.578406	0.616533	0.644969	0.558749	0.503338	0.48478	0.517185	0.506415	0.533069	0.523029	0.534601	0.510793	0.495857	0.484012	0.476895	0.455684	0.461791	0.454912	0.454759	0.433996	0.425203	0.433646	0.430936	0.443895	0.442167	0.423777	0.422618	0.42082	0.404155	0.409045	0.391635	0.401731	0.388326	0.390358	0.393243	0.396577	0.409393	0.422812	0.445835	0.439028	0.456647	0.500535	0.544419	0.575007	0.636598	0.668005	0.712105
0.567363	0.594334	0.569589	0.595162	0.56145	0.50768	0.476896	0.448395	0.440466	0.429762	0.390373	0.381711	0.393478	0.398301	0.396221	0.407886	0.403464	0.409748	0.393002	0.40392	0.394501	0.403572	0.400942	0.394729	0.387888	0.385407	0.381568	0.368762	0.386167	0.374597	0.386274	0.369206	0.389535	0.380941	0.398151	0.395006	0.399345	0.398044	0.408313	0.441997	0.483771	0.542155	0.603158	0.66391	0.69369	0.677336	0.672263	0.699583	0.7063	0.72927
0.595317	0.572999	0.560404	0.549306	0.509548	0.508596	0.494333	0.467727	0.431434	0.465804	0.462492	0.466585	0.459949	0.480205	0.43828	0.477753	0.481999	0.505629	0.49861	0.487861	0.496934	0.524236	0.505861	0.485279	0.48273	0.484422	0.480849	0.440677	0.460525	0.441908	0.457928	0.41757	0.42515	0.430258	0.436368	0.412871	0.385754	0.377549	0.387809	0.382341	0.380924	0.399061	0.425444	0.449809	0.457813	0.49476	0.496077	0.534135	0.569409	0.600662
0.527146	0.495873	0.482482	0.474554	0.456589	0.471479	0.46866	0.447508	0.412423	0.407138	0.416293	0.405747	0.396948	0.408155	0.389694	0.370666	0.385412	0.388478	0.386592	0.370732	0.365552	0.367423	0.371242	0.371288	0.365489	0.354335	0.346183	0.338017	0.344131	0.355174	0.360259	0.345303	0.331554	0.324495	0.341739	0.327045	0.327696	0.332612	0.352481	0.399665	0.438322	0.501798	0.525329	0.581257	0.655202	0.675647	0.742621	0.786486	0.81387	0.81537
0.44967	0.482458	0.477163	0.506973	0.504493	0.481029	0.435578	0.403091	0.376008	0.355476	0.345604	0.344837	0.33295	0.344902	0.312957	0.335151	0.339374	0.315936	0.312562	0.315774	0.316813	0.307582	0.317255	0.318717	0.322197	0.320524	0.32582	0.325907	0.326569	0.326789	0.325947	0.329797	0.318002	0.299121	0.286526	0.291337	0.302324	0.306023	0.308733	0.312892	0.330443	0.338278	0.346897	0.343459	0.350027	0.381672	0.423124	0.493508	0.543274	0.613738
0.597379	0.59862	0.616121	0.675856	0.623655	0.646427	0.659548	0.618229	0.575337	0.569972	0.521493	0.514154	0.489585	0.47421	0.480723	0.461607	0.454209	0.456038	0.463895	0.488862	0.476648	0.501231	0.475516	0.456624	0.445235	0.420124	0.424854	0.423186	0.400657	0.431036	0.425326	0.42567	0.441643	0.418674	0.423398	0.400912	0.400868	0.4129	0.437957	0.441935	0.450992	0.460585	0.472366	0.514403	0.520203	0.516524	0.537425	0.520753	0.553746	0.602802
																							0.432427	0.438304	0.413917	0.403855	0.406446	0.403198	0.36993	0.389244	0.393951	0.39646	0.363035	0.355892	0.363961	0.388358	0.383027	0.392088	0.390941	0.383093	0.386908	0.365905	0.385954	0.416854	0.402613	0.394176	0.389417	0.405853	0.410027
0.538653	0.496834	0.47738	0.434334	0.455191	0.45426	0.446195	0.443967	0.471711	0.420666	0.428883	0.428787	0.413951	0.397987	0.387921	0.380289	0.379568	0.391488	0.413884	0.413633	0.370866	0.374586	0.335827	0.342057	0.361032	0.367938	0.383069	0.354384	0.376705	0.39495	0.363877	0.407128	0.415339	0.392274	0.396825	0.415386	0.440986	0.425352	0.452094	0.426955	0.437951	0.449899	0.483105	0.470813	0.509404	0.530073	0.552029	0.620218	0.678528	0.72687
0.565719	0.591958	0.562485	0.543204	0.551175	0.52221	0.496265	0.482216	0.479039	0.471875	0.43702	0.447559	0.420449	0.411835	0.397876	0.40562	0.395011	0.397678	0.368165	0.374375	0.349422	0.355738	0.355757	0.36738	0.362537	0.360527	0.368735	0.369532	0.350928	0.355489	0.359372	0.361468	0.347057	0.347783	0.349485	0.346091	0.332115	0.327471	0.325934	0.317501	0.321399	0.338735	0.353695	0.374274	0.38717	0.403613	0.421539	0.434783	0.481301	0.540817
0.590906	0.54619	0.5586	0.549773	0.518947	0.523818	0.474282	0.426567	0.410197	0.377713	0.416518	0.404169	0.443708	0.457421	0.485922	0.491435	0.485037	0.482994	0.471262	0.461214	0.451362	0.469714	0.461197	0.455515	0.436331	0.424717	0.425637	0.434149	0.429577	0.422952	0.409471	0.388236	0.397688	0.378931	0.35476	0.333783	0.309209	0.313375	0.322477	0.319056	0.310685	0.315608	0.340101	0.341476	0.340888	0.349987	0.367345	0.384723	0.444262	0.511393
												0.330046	0.36328	0.378632	0.410226	0.401483	0.407524	0.428099	0.411484	0.393255	0.382831	0.382535	0.377063	0.368676	0.384113	0.363909	0.365138	0.349177	0.357208	0.337188	0.331084	0.334053	0.339514	0.390327	0.395718	0.401102	0.433093	0.467037	0.500465	0.552394	0.586275	0.59247	0.603895	0.606747	0.577157	0.625891	0.652207	0.739907	0.716799
0.444801	0.441391	0.448818	0.460198	0.451416	0.446989	0.443987	0.410465	0.409118	0.39749	0.371213	0.387935	0.398636	0.403947	0.397092	0.384389	0.372399	0.379569	0.362388	0.356417	0.342733	0.327386	0.335824	0.316118	0.323367	0.323689	0.337224	0.320169	0.356186	0.364008	0.385881	0.388797	0.385092	0.378208	0.379014	0.371676	0.365657	0.352195	0.355425	0.354517	0.365855	0.369967	0.370639	0.370683	0.369127	0.378158	0.389307	0.384864	0.387138	0.392507
0.591791	0.536125	0.502282	0.500395	0.472104	0.48351	0.4856	0.466923	0.471562	0.486356	0.460358	0.448083	0.434277	0.439947	0.443991	0.443963	0.448628	0.446949	0.438276	0.422896	0.442579	0.421677	0.433365	0.436631	0.427675	0.420094	0.426214	0.432427	0.409622	0.418753	0.423126	0.41506	0.440483	0.429294	0.417306	0.399756	0.411439	0.361372	0.356788	0.358394	0.347394	0.350207	0.369613	0.357943	0.361186	0.394159	0.412871	0.428426	0.464465	0.485012
0.331234	0.337756	0.334075	0.330759	0.325199	0.340292	0.317146	0.319761	0.314313	0.31254	0.300183	0.299016	0.274274	0.269002	0.277879	0.291451	0.290979	0.307835	0.305949	0.313307	0.313168	0.31987	0.312454	0.319653	0.323383	0.308959	0.319335	0.317015	0.302304	0.310922	0.32582	0.319568	0.332528	0.307663	0.329747	0.334203	0.329701	0.342033	0.325397	0.320773	0.320158	0.300744	0.28633	0.309373	0.3199	0.336503	0.377412	0.407625	0.472397	0.494884
0.548764	0.538943	0.498304	0.534698	0.496407	0.489764	0.49278	0.505058	0.496264	0.472831	0.466696	0.476415	0.470914	0.479704	0.500109	0.487385	0.494042	0.508812	0.490701	0.467229	0.470512	0.463193	0.462314	0.457652	0.442192	0.41967	0.41759	0.427252	0.434574	0.47259	0.468006	0.454917	0.459765	0.446371	0.452343	0.447404	0.454277	0.462852	0.481006	0.488514	0.519681	0.560889	0.612733	0.714202	0.793359	0.893959	0.938268	0.93984	0.999125	0.985832
0.489309	0.471299	0.503671	0.514133	0.489849	0.478994	0.487239	0.460673	0.477943	0.441494	0.467548	0.443411	0.465553	0.437204	0.430426	0.408355	0.433934	0.444287	0.450923	0.459297	0.474702	0.468905	0.437942	0.416736	0.393566	0.407937	0.400916	0.404018	0.408248	0.414637	0.402831	0.393749	0.395236	0.397052	0.389023	0.403967	0.395063	0.400628	0.402597	0.371322	0.392263	0.373702	0.375486	0.380382	0.379627	0.401211	0.420143	0.412434	0.428744	0.430959
0.535328	0.487791	0.42587	0.395116	0.430093	0.450812	0.527706	0.542362	0.531775	0.531292	0.481268	0.462386	0.452748	0.44445	0.446922	0.443653	0.44633	0.443669	0.434338	0.411431	0.396179	0.394672	0.38334	0.382469	0.379905	0.380543	0.383105	0.366921	0.381397	0.372662	0.33985	0.326253	0.327267	0.313535	0.329724	0.326159	0.337763	0.340525	0.337182	0.357835	0.36703	0.385598	0.394421	0.382511	0.388037	0.392622	0.401572	0.442611	0.470926	0.52981
0.434015	0.451397	0.382083	0.355455	0.412187	0.397564	0.396471	0.389662	0.374195	0.344423	0.354987	0.339596	0.366867	0.372319	0.369834	0.359363	0.360437	0.354069	0.340619	0.352578	0.362108	0.35383	0.372031	0.355412	0.362312	0.362243	0.375988	0.390229	0.365228	0.352295	0.333222	0.330583	0.35834	0.3416	0.348252	0.360731	0.355517	0.359749	0.364545	0.381879	0.399717	0.407207	0.41554	0.430256	0.438732	0.457735	0.476109	0.520652	0.523065	0.542655
0.569555	0.534546	0.539156	0.540093	0.532171	0.545882	0.502898	0.43149	0.431049	0.471716	0.425002	0.421508	0.442488	0.414418	0.435361	0.437639	0.446012	0.435538	0.440983	0.408781	0.399604	0.40048	0.389111	0.380297	0.39387	0.396836	0.389132	0.380744	0.352685	0.384585	0.401152	0.391515	0.388551	0.365828	0.352455	0.336857	0.359216	0.35684	0.371078	0.361776	0.376757	0.377195	0.376528	0.382598	0.379672	0.372845	0.39733	0.393808	0.423531	0.442712
																									0.537094	0.50899	0.47011	0.479783	0.473943	0.44382	0.470622	0.47206	0.461024	0.486333	0.488135	0.460629	0.470417	0.467622	0.483081	0.495292	0.473896	0.487224	0.475382	0.478223	0.500414	0.532814	0.575521	0.62428	0.672929
																								0.504564	0.528772	0.526337	0.513367	0.515335	0.509341	0.525892	0.505546	0.504925	0.497695	0.492284	0.495284	0.498301	0.5111	0.523076	0.525425	0.572186	0.580978	0.614309	0.633443	0.651453	0.669312	0.703501	0.72688	0.733272	0.818353
0.526521	0.492241	0.510209	0.50417	0.479053	0.491604	0.520421	0.503626	0.507915	0.491389	0.468213	0.489618	0.485881	0.462669	0.455871	0.440193	0.443057	0.410723	0.436407	0.431445	0.43566	0.439682	0.461161	0.436881	0.460841	0.461029	0.419767	0.445813	0.484436	0.468353	0.472343	0.472035	0.473523	0.442723	0.426726	0.438629	0.447746	0.432105	0.428288	0.444937	0.477643	0.533312	0.564416	0.625046	0.677317	0.709208	0.763121	0.734515	0.761486	0.752271
0.553119	0.565267	0.542485	0.546566	0.563617	0.553179	0.51226	0.459838	0.469686	0.420908	0.419431	0.404259	0.425656	0.38465	0.400984	0.398417	0.391397	0.394328	0.413533	0.393275	0.402147	0.406494	0.458049	0.443073	0.459374	0.434665	0.398335	0.388266	0.380462	0.383072	0.40006	0.417949	0.452141	0.419518	0.421987	0.410466	0.422038	0.416204	0.435179	0.465033	0.467739	0.470803	0.528804	0.574449	0.618429	0.686353	0.727783	0.778564	0.818123	0.846088
0.551199	0.527141	0.497401	0.477765	0.479808	0.441087	0.446561	0.397635	0.385482	0.358068	0.342927	0.3277	0.300472	0.294336	0.331626	0.328844	0.308601	0.31914	0.353812	0.332965	0.338224	0.34984	0.355113	0.346141	0.356937	0.31536	0.323732	0.319211	0.323387	0.314086	0.299466	0.301152	0.307312	0.320551	0.318436	0.300241	0.319066	0.313003	0.321521	0.317958	0.333111	0.330217	0.319945	0.339582	0.379291	0.412525	0.445749	0.459876	0.486234	0.526977
0.587454	0.555248	0.542527	0.538234	0.540469	0.533453	0.53899	0.557375	0.529014	0.516221	0.496442	0.473686	0.473727	0.472887	0.453065	0.441286	0.465024	0.438461	0.439391	0.427169	0.40798	0.418088	0.402127	0.403268	0.390458	0.398941	0.392481	0.375701	0.392924	0.380102	0.358739	0.36458	0.348893	0.365571	0.357921	0.345663	0.346076	0.340166	0.344997	0.342797	0.351806	0.345235	0.358249	0.402087	0.441336	0.45828	0.476038	0.529598	0.590542	0.67198
0.595998	0.601275	0.655395	0.677211	0.657974	0.632959	0.647135	0.576607	0.568571	0.546147	0.547385	0.514323	0.500147	0.478567	0.462856	0.453353	0.459802	0.435187	0.422771	0.431193	0.394421	0.40412	0.415984	0.408422	0.407419	0.445835	0.472408	0.457324	0.47921	0.467271	0.467789	0.471379	0.462101	0.460733	0.465446	0.435935	0.437306	0.432334	0.447759	0.414573	0.430991	0.438887	0.44165	0.483623	0.507828	0.49685	0.532238	0.510701	0.513175	0.544636
0.521852	0.533967	0.527651	0.521119	0.517951	0.487497	0.497274	0.504657	0.475934	0.448644	0.462367	0.462413	0.450476	0.466054	0.449074	0.48166	0.482439	0.493273	0.477978	0.465975	0.460844	0.465183	0.453224	0.447084	0.44381	0.422423	0.444353	0.409283	0.416495	0.409389	0.394124	0.401342	0.396361	0.390661	0.39158	0.380911	0.389771	0.387024	0.398952	0.406526	0.40946	0.423702	0.426875	0.428229	0.459127	0.485673	0.549632	0.591727	0.649283	0.69996
															0.483383	0.567821	0.586032	0.603811	0.590618	0.586355	0.572735	0.534089	0.5403	0.543151	0.528753	0.540364	0.536065	0.525775	0.524447	0.520892	0.529546	0.527313	0.520103	0.507055	0.506671	0.497067	0.50512	0.487115	0.505966	0.478282	0.44009	0.45318	0.474749	0.478733	0.481234	0.466772	0.489735	0.52586	0.561891
																0.403144	0.414967	0.428817	0.482014	0.450467	0.463259	0.422106	0.411098	0.41745	0.418249	0.379518	0.396416	0.369558	0.364646	0.347866	0.346252	0.363877	0.340288	0.36864	0.340121	0.325113	0.327542	0.295708	0.312005	0.309573	0.290915	0.321011	0.361624	0.452567	0.51715	0.49908	0.496442	0.558197	0.586921
0.463462	0.438614	0.426993	0.430007	0.450914	0.438004	0.413609	0.41838	0.399976	0.407991	0.401094	0.362273	0.359341	0.356111	0.341305	0.337861	0.353096	0.378084	0.36733	0.379769	0.360675	0.359186	0.37868	0.375777	0.379734	0.374047	0.3714	0.376266	0.341406	0.339093	0.383265	0.422233	0.382268	0.438519	0.420228	0.453313	0.420449	0.424131	0.390435	0.403147	0.392316	0.370335	0.364952	0.38403	0.408944	0.404784	0.450106	0.473205	0.530571	0.581134
0.400381	0.399462	0.37362	0.381281	0.394126	0.395681	0.412269	0.406225	0.397736	0.390675	0.414071	0.389011	0.367989	0.370441	0.365746	0.377218	0.389032	0.389046	0.393248	0.385385	0.392646	0.395001	0.404673	0.404628	0.400834	0.390308	0.369765	0.364917	0.356561	0.341191	0.304718	0.303712	0.296706	0.314417	0.293931	0.304476	0.322833	0.342865	0.367297	0.392255	0.418224	0.50485	0.604286	0.69412	0.731896	0.773509	0.749984	0.766	0.754086	0.755547
0.488969	0.54191	0.636099	0.599061	0.630742	0.61154	0.663784	0.664752	0.616298	0.642365	0.577968	0.60334	0.575401	0.55853	0.511522	0.46868	0.443091	0.406728	0.39109	0.379215	0.386604	0.359042	0.366869	0.36834	0.34039	0.326851	0.333535	0.320389	0.3284	0.344842	0.355415	0.357648	0.345068	0.375611	0.331324	0.34427	0.368731	0.426805	0.430443	0.399059	0.408808	0.365852	0.387775	0.470508	0.448538	0.448506	0.494986	0.535694	0.607857	0.623386
0.557076	0.598717	0.673207	0.656687	0.610352	0.633662	0.646244	0.624058	0.598349	0.584898	0.563705	0.51898	0.525125	0.520327	0.494907	0.499751	0.471587	0.486783	0.479057	0.471799	0.489221	0.463899	0.467545	0.470053	0.467683	0.469278	0.453358	0.428166	0.410153	0.422745	0.419966	0.409695	0.390722	0.419021	0.404843	0.409606	0.410618	0.423726	0.39692	0.412379	0.417735	0.440784	0.439427	0.442796	0.43472	0.457751	0.488964	0.540961	0.630395	0.692951
																	0.466935	0.454236	0.457833	0.485463	0.486766	0.489833	0.492399	0.501761	0.486841	0.500336	0.507032	0.524045	0.521662	0.530326	0.525639	0.515313	0.511112	0.520232	0.500159	0.493452	0.480865	0.503285	0.462507	0.48013	0.486839	0.524949	0.526428	0.517476	0.582139	0.656833	0.718577	0.780365	0.830562
0.419992	0.426917	0.427212	0.449743	0.446306	0.430233	0.41098	0.426129	0.423053	0.416969	0.419242	0.404062	0.428719	0.437609	0.436229	0.431721	0.403434	0.418487	0.437539	0.420953	0.408618	0.40738	0.41399	0.405618	0.392887	0.379261	0.380055	0.353821	0.354849	0.334294	0.322423	0.317084	0.308407	0.279338	0.305587	0.343488	0.327161	0.341261	0.362778	0.375324	0.366462	0.376384	0.400914	0.453861	0.508353	0.592436	0.641365	0.649545	0.665583	0.672466
			0.557324	0.549302	0.536936	0.525712	0.558207	0.523512	0.542231	0.536432	0.512769	0.497629	0.47808	0.484418	0.491263	0.491722	0.474821	0.473965	0.484944	0.486364	0.485414	0.490141	0.490952	0.501846	0.475831	0.442983	0.427926	0.425657	0.432743	0.422234	0.422608	0.430942	0.420382	0.438423	0.455291	0.449802	0.490054	0.499524	0.543886	0.589457	0.596413	0.650323	0.673622	0.717843	0.77742	0.77627	0.780956	0.782885	0.832921
0.545297	0.550267	0.536437	0.603014	0.592902	0.557903	0.545264	0.556665	0.585117	0.548988	0.526377	0.53027	0.498693	0.508318	0.475483	0.481676	0.476498	0.497748	0.442817	0.449783	0.433458	0.431504	0.407507	0.401445	0.422727	0.372856	0.40288	0.427969	0.421152	0.411585	0.420217	0.401238	0.403262	0.404845	0.384496	0.377949	0.419784	0.4105	0.427976	0.407104	0.438611	0.397686	0.436754	0.431084	0.435109	0.442961	0.482036	0.533404	0.568131	0.65892
0.59265	0.580931	0.579824	0.575815	0.564685	0.574642	0.578591	0.561291	0.55493	0.519425	0.515847	0.49756	0.505547	0.493656	0.47273	0.474039	0.488715	0.517194	0.514994	0.53052	0.519485	0.519697	0.510568	0.513641	0.496161	0.496675	0.477705	0.461096	0.456911	0.462692	0.462894	0.467373	0.466433	0.456949	0.453547	0.453846	0.437688	0.452547	0.478678	0.48395	0.501892	0.539214	0.545174	0.583149	0.590389	0.605583	0.640612	0.662253	0.698018	0.733233
		0.341286	0.361399	0.340819	0.326505	0.29809	0.284134	0.274448	0.237151	0.237406	0.232675	0.219439	0.218846	0.230486	0.244217	0.223492	0.230993	0.239517	0.228878	0.230952	0.217608	0.237715	0.233737	0.242875	0.24243	0.241847	0.239532	0.250382	0.227144	0.218259	0.241471	0.238058	0.236755	0.253909	0.253827	0.242189	0.262224	0.262855	0.247482	0.259362	0.256553	0.275253	0.303073	0.321351	0.374312	0.452446	0.50916	0.574066	0.614788
0.531501	0.538317	0.515002	0.517617	0.531693	0.54433	0.563565	0.514035	0.466109	0.452498	0.463871	0.475825	0.45791	0.435873	0.431108	0.436061	0.438921	0.44076	0.448707	0.459235	0.437835	0.43646	0.438568	0.441043	0.446295	0.419246	0.431834	0.419185	0.431355	0.429554	0.421826	0.410946	0.408277	0.412879	0.421717	0.419752	0.412245	0.423664	0.431544	0.402142	0.367433	0.39528	0.39087	0.418969	0.41751	0.481067	0.555421	0.588521	0.659757	0.702282
0.578919	0.608589	0.609794	0.59953	0.580752	0.535392	0.535559	0.498495	0.479719	0.466644	0.447529	0.451483	0.441044	0.456697	0.447135	0.430341	0.412294	0.404761	0.405723	0.402024	0.40229	0.40295	0.399965	0.397776	0.386825	0.377889	0.371573	0.356523	0.370339	0.375365	0.391248	0.394401	0.389216	0.387505	0.382593	0.377548	0.369635	0.370484	0.352889	0.332112	0.338351	0.356676	0.396035	0.39968	0.439045	0.434137	0.434329	0.438918	0.435621	0.478774
0.39322	0.400993	0.381974	0.390847	0.412533	0.417239	0.466033	0.460417	0.430926	0.439419	0.434156	0.428739	0.414316	0.388302	0.386149	0.393019	0.41037	0.406039	0.401575	0.426229	0.443306	0.442056	0.432759	0.457059	0.455095	0.448437	0.420653	0.409291	0.385408	0.378301	0.390343	0.36305	0.344508	0.351685	0.356563	0.34481	0.339037	0.370688	0.40433	0.388452	0.395451	0.404254	0.419519	0.428053	0.431064	0.416869	0.411152	0.411593	0.426015	0.434814
0.524716	0.401592	0.39902	0.431776	0.424885	0.498455	0.553412	0.537758	0.55746	0.494311	0.455297	0.418204	0.437437	0.415263	0.443213	0.449254	0.456307	0.460557	0.427522	0.423278	0.41392	0.424876	0.433536	0.410336	0.421982	0.418507	0.417585	0.423547	0.433708	0.439496	0.405509	0.410638	0.434323	0.422986	0.412634	0.401708	0.421041	0.423819	0.425807	0.416413	0.425069	0.473937	0.49375	0.53091	0.544441	0.573923	0.618772	0.677002	0.720935	0.790139
0.563293	0.531349	0.517838	0.518375	0.485402	0.464259	0.457593	0.466672	0.472003	0.452834	0.444498	0.442146	0.457367	0.442406	0.439299	0.427028	0.455761	0.40664	0.441773	0.440602	0.398554	0.436351	0.426919	0.418212	0.409007	0.41757	0.405563	0.398652	0.400317	0.387791	0.385677	0.36637	0.385415	0.389783	0.373545	0.364991	0.373414	0.362354	0.341568	0.347547	0.347107	0.365035	0.383427	0.422514	0.434995	0.466012	0.489193	0.53557	0.578863	0.622882
								0.510856	0.466353	0.47317	0.477093	0.465228	0.473252	0.476353	0.471745	0.466181	0.45108	0.444891	0.42599	0.408364	0.411474	0.427186	0.429669	0.408017	0.404631	0.406862	0.412754	0.402628	0.385729	0.392227	0.398241	0.416433	0.410843	0.413257	0.406061	0.374322	0.369712	0.36742	0.384271	0.380201	0.359298	0.312075	0.301945	0.274441	0.305091	0.288632	0.290673	0.309501	0.325309
[truncated: 25 more columns]

## Sheet: Ribociclib_G1 (CDK4)
Time since mitogen stimulation (hr)
0.2	0.4	0.6	0.8	1	1.2	1.4	1.6	1.8	2	2.2	2.4	2.6	2.8	3	3.2	3.4	3.6	3.8	4	4.2	4.4	4.6	4.8	5	5.2	5.4	5.6	5.8	6	6.2	6.4	6.6	6.8	7	7.2	7.4	7.6	7.8	8	8.2	8.4	8.6	8.8	9	9.2	9.4	9.6	9.8	10
0.793655	0.747939	0.796328	0.755347	0.625217	0.573711	0.570426	0.580746	0.578766	0.553896	0.48107	0.494402	0.46685	0.472634	0.465344	0.462118	0.433972	0.420604	0.424192	0.420813	0.451359	0.400971	0.356679	0.322563	0.273056	0.305905	0.291364	0.258922	0.266844	0.270114	0.271445	0.28022	0.284759	0.293485	0.305968	0.32658	0.300729	0.328792	0.359452	0.416833	0.47179	0.497739	0.617808	0.812102	0.948439	0.963251	1.05164	1.19488	1.20869	1.29803
0.891121	0.898396	0.806379	0.811049	0.76143	0.704932	0.696568	0.6959	0.584439	0.599544	0.577839	0.614464	0.630323	0.640214	0.608063	0.56617	0.604178	0.665372	0.647431	0.66817	0.690154	0.720933	0.710138	0.667275	0.667797	0.69665	0.634298	0.600455	0.616224	0.555727	0.622241	0.703074	0.556103	0.572311	0.584522	0.497499	0.493822	0.509382	0.535761	0.555561	0.617654	0.602574	0.588877	0.59787	0.589696	0.578129	0.633276	0.625718	0.750619	0.82055
0.826936	0.700475	0.686909	0.638291	0.601367	0.520204	0.513857	0.470234	0.445269	0.468356	0.432755	0.384943	0.389689	0.3961	0.409849	0.420921	0.408095	0.415085	0.394002	0.439162	0.436001	0.433961	0.476301	0.440633	0.415599	0.474332	0.436926	0.407678	0.411856	0.429425	0.40742	0.401293	0.407828	0.418756	0.371758	0.379555	0.362322	0.399947	0.480083	0.732166	0.898996	0.924888	0.978996	1.02937	0.916268	0.841682	0.937813	1.03626	1.02511	1.01324
0.966825	0.920546	0.781656	0.784156	0.680229	0.69485	0.639444	0.673491	0.677412	0.708882	0.657134	0.645185	0.641075	0.681406	0.673746	0.738209	0.691988	0.683888	0.659647	0.617304	0.543407	0.534245	0.484134	0.496009	0.455003	0.446751	0.43234	0.418629	0.43945	0.431568	0.45412	0.458628	0.460549	0.499995	0.522737	0.571521	0.717929	0.894529	1.03517	1.03998	1.0517	1.10876	1.07128	1.04013	1.13972	1.15644	1.22715	1.09978	1.10622	1.17759
										0.800689	0.878972	0.852498	0.804832	0.914858	0.887712	0.985145	1.04584	0.931726	0.878574	0.849494	0.826083	0.850859	0.791294	0.851473	0.89052	0.867214	0.823713	0.867941	0.809849	0.742413	0.738214	0.786693	0.788056	0.773036	0.76311	0.76627	0.778771	0.794589	0.749548	0.783821	0.873145	0.945159	0.857495	0.878207	0.882392	0.969168	1.0708	1.00159	1.3822
																	0.489622	0.528565	0.45122	0.479504	0.471325	0.493691	0.486642	0.477842	0.468239	0.423974	0.445944	0.436661	0.454494	0.473553	0.451679	0.455689	0.417961	0.436374	0.45492	0.483909	0.458511	0.488396	0.569476	0.688961	0.810449	0.850952	0.917573	1.0063	1.0043	0.998754	0.993464	1.09933	1.0685
																					0.774273	0.717987	0.650716	0.645433	0.650171	0.687368	0.670509	0.676808	0.687092	0.694442	0.76886	0.761773	0.753753	0.75469	0.757938	0.824313	0.790758	0.882289	0.853113	0.915788	0.767193	0.926277	0.949403	0.971298	1.05956	0.95161	0.994658	1.08136	1.07393
																								0.630434	0.647058	0.609194	0.568701	0.595939	0.589634	0.6464	0.611932	0.669546	0.689962	0.693567	0.642934	0.705779	0.679833	0.62999	0.645453	0.872358	1.24862	1.19128	1.24497	1.27094	1.17662	1.13684	1.1127	1.16351	1.11739
0.87853	0.827197	0.787417	0.779363	0.784852	0.693249	0.668616	0.633746	0.576279	0.53117	0.555189	0.567495	0.577286	0.534825	0.533661	0.518643	0.490646	0.478804	0.474942	0.459202	0.457499	0.448687	0.454588	0.441243	0.408073	0.455889	0.431914	0.435582	0.4369	0.439711	0.407141	0.417694	0.427091	0.47674	0.447582	0.484924	0.551001	0.61338	0.689544	0.902869	1.02544	1.16913	1.17255	1.1697	1.14594	1.13552	1.08247	1.08184	1.10484	1.1144
0.662687	0.873798	0.672487	0.820949	0.713869	0.677959	0.684363	0.686254	0.665138	0.572466	0.525441	0.435016	0.526589	0.608289	0.681109	0.682931	0.729761	0.68538	0.701131	0.612999	0.636966	0.660875	0.637414	0.640693	0.677745	0.734075	0.819074	0.817121	0.758887	0.679069	0.629857	0.616202	0.592613	0.607826	0.60991	0.579622	0.638937	0.631084	0.600839	0.610987	0.632854	0.711471	0.641368	0.683888	0.80419	0.767857	0.89752	0.87604	1.03299	1.03781
																0.958365	0.938938	0.93207	0.94725	0.892909	0.900169	0.957229	0.829608	0.818798	0.804356	0.744993	0.752174	0.726639	0.724602	0.71533	0.693935	0.714942	0.738602	0.683202	0.681238	0.674095	0.699744	0.731804	0.756249	0.787069	0.76281	0.871171	0.93284	1.12243	1.11696	1.18144	1.21548	1.25889	1.25905
0.76374	0.763397	0.644431	0.617615	0.627674	0.739908	0.790531	0.832796	0.746429	0.657572	0.632607	0.606351	0.587299	0.597616	0.555402	0.561203	0.538413	0.532486	0.503403	0.502569	0.494111	0.511538	0.506346	0.533398	0.527341	0.520219	0.52503	0.536267	0.533848	0.524208	0.496396	0.519718	0.499539	0.562094	0.61474	0.704232	0.884625	1.01919	1.15941	1.21056	1.17266	1.16895	1.17892	1.2201	1.25708	1.17831	1.12122	1.11689	1.09739	1.14622
0.616638	0.556134	0.643438	0.559072	0.57472	0.623434	0.623292	0.608292	0.656213	0.557031	0.563843	0.59926	0.567837	0.616068	0.574696	0.614609	0.573259	0.542886	0.493811	0.512182	0.513757	0.635149	0.575752	0.61781	0.600187	0.604884	0.557582	0.543786	0.552722	0.564269	0.515871	0.51375	0.516345	0.545574	0.556993	0.549548	0.579532	0.597367	0.619739	0.6391	0.647743	0.80615	0.857949	0.983421	0.976259	1.11802	1.21153	1.28037	1.31167	1.20638
0.721572	0.719458	0.670036	0.614718	0.644528	0.57312	0.570476	0.572897	0.535133	0.562579	0.504058	0.533627	0.503242	0.487706	0.489974	0.456066	0.451229	0.421765	0.426181	0.375244	0.391233	0.412384	0.458873	0.488494	0.399498	0.30833	0.305771	0.327429	0.351553	0.333829	0.344901	0.329376	0.341365	0.341519	0.360101	0.366685	0.350937	0.36299	0.371703	0.367606	0.387037	0.458774	0.670389	0.913288	0.980228	0.963087	0.90485	0.980096	1.04912	1.01032
0.809781	0.731044	0.712805	0.771017	0.680287	0.69791	0.708274	0.698658	0.71485	0.744425	0.672194	0.675425	0.608539	0.625381	0.59291	0.609496	0.634393	0.678497	0.705284	0.692922	0.659685	0.649517	0.584551	0.552339	0.566455	0.588045	0.562564	0.488809	0.480685	0.462738	0.467575	0.432205	0.440918	0.416185	0.424295	0.441437	0.440733	0.430361	0.459045	0.55177	0.845219	1.19914	1.2781	1.29221	1.35127	1.30771	1.27777	1.23984	1.19548	1.12642
0.777865	0.690882	0.653019	0.669306	0.67643	0.709576	0.678736	0.600393	0.530874	0.532678	0.505115	0.457887	0.412707	0.433135	0.45992	0.435415	0.471538	0.497439	0.499194	0.530655	0.492875	0.529424	0.561497	0.568628	0.534485	0.551366	0.531578	0.542492	0.557882	0.614286	0.613906	0.598925	0.655215	0.640784	0.663351	0.729529	0.827536	0.819056	0.82537	0.792463	0.748264	0.767222	0.775795	0.857542	0.945045	1.02254	1.04648	1.06621	1.10947	1.08974
0.700194	0.7837	0.733644	0.66457	0.846068	0.760969	0.675808	0.663585	0.651491	0.593075	0.615876	0.560384	0.591728	0.579094	0.563156	0.586837	0.615034	0.568977	0.544069	0.605824	0.581539	0.614907	0.597798	0.463628	0.548526	0.555942	0.512115	0.507328	0.447178	0.442869	0.478894	0.467394	0.486145	0.543275	0.516399	0.519106	0.518176	0.536998	0.590116	0.956825	1.18057	1.26819	1.28641	1.33985	1.40277	1.4238	1.47334	1.45184	1.47717	1.44707
0.776713	0.725714	0.766324	0.747302	0.760731	0.729618	0.829842	0.836894	0.79719	0.779438	0.836916	0.811238	0.889224	0.867622	0.892575	0.851567	0.838484	0.799103	0.76666	0.726403	0.671676	0.613449	0.665201	0.627727	0.649414	0.594278	0.647577	0.589182	0.585082	0.579626	0.591191	0.610916	0.59881	0.547197	0.535542	0.585347	0.548332	0.56455	0.511498	0.534843	0.539253	0.65677	0.579057	0.680015	0.73077	0.753164	0.845677	0.824906	0.90511	0.95962
0.778823	0.856995	0.837989	0.808822	0.787776	0.754297	0.749101	0.683041	0.587944	0.566721	0.529694	0.522352	0.457521	0.446035	0.426759	0.418745	0.465602	0.426161	0.474621	0.51345	0.485308	0.438764	0.46498	0.472419	0.486118	0.482494	0.49968	0.49969	0.472302	0.486603	0.468403	0.473463	0.46391	0.45634	0.494693	0.498574	0.670965	0.957139	1.03184	0.938421	0.898418	0.91122	0.942603	0.99748	0.994601	1.006	0.962962	0.970542	1.01515	1.03653
0.880225	0.878951	0.806011	0.797427	0.822009	0.866818	0.876073	0.852686	0.869857	0.931241	0.822199	0.796143	0.764063	0.726924	0.613339	0.523956	0.495502	0.463674	0.420187	0.376396	0.377847	0.384628	0.413121	0.394606	0.375475	0.354505	0.429806	0.419401	0.452393	0.379119	0.474912	0.435333	0.378055	0.47233	0.670944	0.789871	0.774311	0.852247	0.973785	0.976486	0.990332	1.02174	1.10175	1.09581	1.23375	1.18333	1.2382	1.14496	1.11738	1.08687
0.569472	0.532421	0.466554	0.475423	0.459356	0.444785	0.434749	0.420213	0.457633	0.444291	0.369904	0.335439	0.425754	0.424722	0.404814	0.343869	0.409651	0.393773	0.423255	0.443038	0.426618	0.417591	0.403601	0.398798	0.406106	0.360654	0.389045	0.400411	0.367765	0.363103	0.344789	0.38126	0.398774	0.460832	0.538131	0.601003	0.673442	0.750476	0.878374	0.907381	0.923626	0.961245	1.03735	0.979602	1.0003	0.987943	1.01699	1.05957	1.0514	1.04866
0.917822	0.866935	0.793469	0.678742	0.753124	0.706692	0.669446	0.702067	0.661128	0.697675	0.706981	0.6574	0.6254	0.634232	0.599467	0.574134	0.576676	0.572636	0.572622	0.535951	0.528169	0.548734	0.526934	0.502878	0.484194	0.486031	0.505382	0.482099	0.464479	0.472009	0.465337	0.470606	0.579461	1.01379	1.24251	1.21365	1.24213	1.26065	1.17143	1.18928	1.19427	1.24657	1.27979	1.33298	1.264	1.42282	1.42398	1.42174	1.4604	1.40013
0.69215	0.610494	0.675076	0.608044	0.642053	0.667376	0.683611	0.66705	0.624474	0.610031	0.624529	0.603007	0.606216	0.560277	0.513399	0.501919	0.533835	0.537209	0.538459	0.557268	0.582432	0.557703	0.588051	0.558373	0.546075	0.508212	0.498958	0.467868	0.476705	0.476525	0.494615	0.529406	0.551751	0.55936	0.545129	0.517002	0.52925	0.540732	0.56957	0.570159	0.557966	0.586646	0.581826	0.625543	0.697281	0.905425	1.02415	1.13792	1.06855	1.09215
0.931614	0.851625	0.800556	0.750358	0.69769	0.680732	0.635996	0.597665	0.556907	0.515901	0.478394	0.468998	0.494089	0.430471	0.479102	0.448261	0.407117	0.369116	0.366667	0.391445	0.393766	0.378221	0.385054	0.389499	0.396335	0.380355	0.430808	0.478991	0.571612	0.715562	0.800212	0.818794	0.801104	0.777679	0.816564	0.82166	0.831745	0.91778	1.05994	0.984391	1.01405	1.02061	1.03265	1.13694	1.152	1.23958	1.30419	1.30979	1.29099	1.20018
0.826352	0.791801	0.733901	0.660683	0.659371	0.643213	0.642604	0.657839	0.640789	0.652386	0.65322	0.628256	0.588851	0.58596	0.553337	0.523429	0.519237	0.501183	0.480591	0.496948	0.511885	0.52679	0.558404	0.500474	0.486782	0.472057	0.500066	0.48627	0.467977	0.454297	0.472143	0.463291	0.500747	0.488784	0.48799	0.459819	0.47528	0.476902	0.549322	0.80323	1.00218	1.10913	1.13231	1.17726	1.18387	1.24541	1.22317	1.22499	1.26611	1.30514
0.852208	0.896705	0.847836	0.76709	0.714039	0.651806	0.627228	0.622612	0.689503	0.613818	0.608792	0.551578	0.506119	0.503404	0.482953	0.479438	0.44821	0.437767	0.404664	0.412562	0.398858	0.424169	0.366926	0.326924	0.344207	0.30569	0.31702	0.305425	0.328884	0.324912	0.327145	0.322643	0.353628	0.41499	0.421666	0.412612	0.431421	0.444177	0.46698	0.481502	0.516047	0.633764	0.839492	0.939087	0.985987	0.956717	1.07919	1.09905	1.04125	1.03432
																			0.284594	0.306972	0.3006	0.298686	0.273671	0.297492	0.30476	0.285094	0.29473	0.281527	0.276952	0.28796	0.291611	0.283635	0.29684	0.308455	0.352069	0.342329	0.371346	0.479139	0.639305	0.713347	0.978989	1.1721	1.13923	1.14175	1.11639	1.13684	1.15423	1.34219	1.27695
0.680523	0.610311	0.636966	0.551791	0.587868	0.571076	0.600056	0.555841	0.503059	0.511917	0.488825	0.503619	0.496832	0.492474	0.457966	0.466953	0.448457	0.461071	0.448457	0.432104	0.421373	0.425303	0.428014	0.437556	0.430905	0.443083	0.421022	0.467562	0.485596	0.506781	0.529115	0.572388	0.57795	0.583767	0.682876	0.885481	1.05728	1.15773	1.17385	1.22483	1.21554	1.28435	1.29304	1.31456	1.30089	1.33861	1.29542	1.37609	1.40921	1.40286
0.825848	0.819325	0.761438	0.754792	0.762441	0.672865	0.784441	0.90189	0.933478	0.815679	0.716813	0.739319	0.614014	0.556813	0.503107	0.446669	0.500671	0.465676	0.500117	0.502	0.455223	0.487537	0.405816	0.386698	0.395285	0.407184	0.377267	0.382792	0.385266	0.386289	0.387278	0.374985	0.367837	0.373851	0.441515	0.548099	0.7108	0.774462	0.768373	0.793101	0.776224	0.878927	0.994174	1.06409	1.15768	1.18792	1.31502	1.33845	1.29425	1.28912
0.645719	0.589459	0.759804	0.521496	0.801858	0.580612	0.586054	0.87875	0.609824	0.522614	0.570343	0.557603	0.552243	0.483108	0.43054	0.423298	0.413052	0.434982	0.40028	0.455784	0.498277	0.494838	0.429167	0.423857	0.46897	0.492481	0.521486	0.486621	0.491081	0.446464	0.486852	0.476518	0.407887	0.517744	0.515339	0.524608	0.494075	0.450681	0.410173	0.39312	0.412603	0.410707	0.400175	0.436841	0.456742	0.457178	0.494274	0.51445	0.540084	0.666833
0.675723	0.716342	0.674345	0.645171	0.655598	0.706164	0.697008	0.746793	0.697075	0.857373	0.810058	0.758931	0.771639	0.773718	0.677349	0.634112	0.572565	0.487934	0.437173	0.461164	0.440093	0.39741	0.395345	0.38205	0.379957	0.362113	0.320827	0.314174	0.338622	0.342789	0.363742	0.399066	0.407244	0.483443	0.855869	1.07008	1.13652	1.09588	1.13033	1.19214	1.21711	1.15893	1.24376	1.26307	1.13819	1.12366	1.13773	1.24707	1.35949	1.38206
0.632526	0.638273	0.56122	0.574023	0.565193	0.551975	0.488207	0.443017	0.400352	0.397732	0.40306	0.387507	0.397165	0.380255	0.365818	0.380307	0.382791	0.37805	0.402053	0.376489	0.416689	0.396169	0.398049	0.416096	0.384011	0.397343	0.352051	0.369462	0.362829	0.344894	0.346369	0.352466	0.374515	0.395988	0.400861	0.414537	0.384466	0.404041	0.434414	0.508379	0.697367	0.907938	0.953072	1.00906	1.06718	1.09462	1.08245	1.09453	1.09883	1.07073
0.783349	0.741734	0.727782	0.686205	0.671569	0.654686	0.602734	0.594593	0.583674	0.555036	0.604057	0.526822	0.515328	0.530473	0.529159	0.562899	0.540736	0.536835	0.563749	0.590321	0.577565	0.54242	0.482905	0.500094	0.474543	0.456865	0.451169	0.453091	0.447042	0.434597	0.427058	0.457718	0.458085	0.46332	0.45359	0.496514	0.547148	0.612988	0.673472	0.745684	0.709143	0.643396	0.631265	0.596319	0.584181	0.640489	0.72443	0.928806	1.10453	1.18989
0.741222	0.660794	0.630636	0.639685	0.56231	0.527762	0.499886	0.504299	0.444214	0.474105	0.445378	0.447803	0.466386	0.442525	0.472004	0.489784	0.476152	0.417092	0.445368	0.471747	0.456119	0.43402	0.46252	0.400667	0.411644	0.42383	0.405344	0.438466	0.406174	0.420336	0.433513	0.425955	0.435506	0.48891	0.761168	1.09553	1.13448	1.16225	1.13546	1.17395	1.21141	1.18384	1.23531	1.28216	1.34128	1.35784	1.36113	1.39342	1.34847	1.35509
0.865147	0.903329	0.834815	0.783386	0.71939	0.692619	0.63667	0.610456	0.602386	0.59702	0.601915	0.570569	0.551727	0.568557	0.54575	0.532651	0.565629	0.532878	0.498313	0.506698	0.468726	0.485683	0.494796	0.494445	0.49128	0.514359	0.528395	0.542949	0.555364	0.540798	0.518888	0.534572	0.564878	0.563005	0.626381	0.75167	0.79787	0.796509	0.79515	0.887159	1.0064	0.99913	0.962278	0.965423	1.04949	1.03263	1.09467	1.15468	1.22898	1.2853
0.665628	0.671786	0.684553	0.635916	0.656203	0.717363	0.735428	0.716219	0.701706	0.688642	0.64848	0.649999	0.617088	0.583213	0.541642	0.516182	0.490564	0.450551	0.439418	0.44113	0.404945	0.408677	0.404916	0.369406	0.372752	0.381625	0.35578	0.374075	0.356319	0.346976	0.354119	0.362889	0.34396	0.340232	0.321002	0.306875	0.328201	0.33097	0.453241	0.643292	0.780631	0.779653	0.877994	0.925614	0.951451	1.00917	1.01108	1.03882	1.06175	1.05673
0.781653	0.737633	0.639482	0.645807	0.697112	0.662232	0.718177	0.686608	0.639939	0.641204	0.634631	0.574783	0.550284	0.519034	0.51853	0.530513	0.503121	0.510805	0.490764	0.472452	0.472209	0.489401	0.472076	0.449354	0.43546	0.448198	0.439029	0.410087	0.456828	0.434733	0.441028	0.451561	0.437078	0.45908	0.568529	0.767757	0.943656	0.999293	1.07118	1.04781	1.11321	1.17038	1.17228	1.14744	1.16402	1.13758	1.14775	1.18191	1.21331	1.23605
												0.825976	0.829779	0.798958	0.827751	0.787397	0.815329	0.746639	0.666504	0.666479	0.686614	0.714264	0.689698	0.740191	0.694677	0.743989	0.755994	0.831045	0.736735	0.781494	0.739088	0.699802	0.730302	0.72353	0.661813	0.765013	0.866387	0.880478	0.912398	1.01575	1.07943	1.04007	1.05623	1.0504	1.08433	1.09082	1.17847	1.2254	1.32093
																								0.655797	0.625915	0.594458	0.637005	0.590374	0.564794	0.569213	0.555831	0.54784	0.532826	0.536003	0.528075	0.543805	0.600494	0.651471	0.786707	0.765984	0.89151	1.04282	1.19527	1.18813	1.22695	1.24063	1.30788	1.33141	1.32842
0.759325	0.680975	0.629125	0.651616	0.686656	0.694123	0.723241	0.6795	0.667569	0.645566	0.596221	0.660758	0.58933	0.557987	0.549789	0.523207	0.508692	0.52663	0.513718	0.463083	0.436066	0.474127	0.445655	0.413101	0.431086	0.444421	0.436806	0.441797	0.456672	0.443413	0.394832	0.420016	0.385534	0.392871	0.391795	0.415806	0.59546	0.947697	1.1763	1.1967	1.20854	1.21391	1.2419	1.29641	1.29109	1.30595	1.35257	1.37094	1.37837	1.40241
0.665652	0.945209	0.829816	0.762635	0.859905	0.786905	0.864555	0.870728	0.85512	0.780734	0.795666	0.670969	0.645283	0.634173	0.538234	0.541713	0.496612	0.521528	0.539752	0.551952	0.573858	0.542728	0.545316	0.611051	0.618373	0.641216	0.682201	0.623257	0.644348	0.662358	0.692782	0.668712	0.564908	0.560491	0.563616	0.649123	0.661142	0.676252	0.733	0.758571	0.768809	0.871088	0.977081	1.11305	1.19543	1.30034	1.21983	1.24868	0.99824	0.966887
0.852012	0.835689	0.805264	0.713526	0.641096	0.58895	0.54889	0.549842	0.530811	0.49819	0.521629	0.51799	0.519882	0.526761	0.557958	0.543312	0.54614	0.580377	0.581306	0.545768	0.563735	0.624666	0.604043	0.595336	0.631817	0.598448	0.572456	0.60522	0.594361	0.574081	0.549147	0.536885	0.510264	0.519594	0.47957	0.46018	0.457867	0.43823	0.458445	0.472474	0.496007	0.535348	0.57042	0.655277	0.753371	0.989488	1.10042	1.30463	1.37355	1.42875
0.874837	0.827619	0.869768	0.825937	0.755513	0.697909	0.646378	0.651294	0.682759	0.648754	0.615453	0.616312	0.615483	0.656523	0.685569	0.664822	0.596377	0.600703	0.572927	0.60668	0.604978	0.575482	0.567114	0.586817	0.585619	0.582805	0.5655	0.55306	0.57786	0.543072	0.589964	0.529504	0.532458	0.515775	0.524323	0.528506	0.535854	0.49453	0.505719	0.584862	0.801746	1.01292	1.1725	1.29152	1.26588	1.25377	1.2825	1.21986	1.32135	1.35047
0.813024	0.822451	0.767351	0.656582	0.601886	0.598457	0.542404	0.511324	0.502354	0.59754	0.55553	0.562441	0.562355	0.575298	0.604944	0.611408	0.568815	0.524626	0.491045	0.489981	0.503038	0.483199	0.471539	0.459584	0.418022	0.398611	0.416365	0.396366	0.395458	0.393057	0.411877	0.421314	0.475674	0.789304	1.12004	1.18117	1.30086	1.21819	1.16955	1.21737	1.24056	1.25492	1.30253	1.31184	1.33605	1.40346	1.39029	1.37579	1.32068	1.31627
0.600508	0.531375	0.510503	0.473135	0.431212	0.416723	0.385599	0.364793	0.360247	0.316144	0.315887	0.32376	0.323308	0.348349	0.285353	0.30066	0.306658	0.323076	0.310056	0.311406	0.319553	0.327909	0.298588	0.318564	0.318657	0.31601	0.344167	0.332336	0.311821	0.321624	0.339589	0.337308	0.358438	0.329776	0.377934	0.375007	0.372462	0.412844	0.510168	0.619139	0.767509	0.842788	0.916806	0.929892	0.962683	1.03912	1.10877	1.12822	1.18259	1.22003
0.70524	0.73395	0.702284	0.763466	0.778609	0.756745	0.755524	0.756178	0.709183	0.718818	0.66245	0.718837	0.668694	0.632381	0.641565	0.613092	0.639774	0.619437	0.610368	0.561301	0.533868	0.501568	0.48462	0.466225	0.459533	0.428997	0.416562	0.387804	0.388377	0.360116	0.377073	0.449701	0.771755	0.958392	1.06237	1.11688	1.20598	1.24537	1.33848	1.30358	1.2697	1.26461	1.32451	1.30087	1.27982	1.30131	1.18521	1.12634	1.14482	1.1626
0.436595	0.504361	0.52727	0.55135	0.555264	0.560786	0.51935	0.696347	0.685286	0.624426	0.632341	0.620352	0.618454	0.6125	0.530163	0.473827	0.421306	0.433584	0.403012	0.422567	0.434518	0.422309	0.451482	0.449026	0.453953	0.441074	0.372419	0.344763	0.371711	0.350242	0.34884	0.337207	0.359522	0.360603	0.415308	0.483814	0.572918	0.660065	0.64761	0.637056	0.646998	0.577328	0.446813	0.520466	0.573197	0.586777	0.661918	0.722159	0.799787	0.90104
							0.935421	0.871251	0.812286	0.840639	0.827381	0.741081	0.703425	0.665846	0.659375	0.638675	0.656715	0.66143	0.664417	0.701583	0.625628	0.63707	0.584667	0.56247	0.543283	0.544489	0.525218	0.515792	0.537809	0.552082	0.527864	0.53889	0.551572	0.570749	0.579851	0.645951	0.632447	0.6411	0.564798	0.565506	0.547593	0.561976	0.559828	0.584285	0.657956	0.861876	1.00853	1.09126	1.18505
													0.64226	0.630591	0.634439	0.609879	0.607955	0.633454	0.658519	0.708776	0.67029	0.672179	0.686291	0.688562	0.690581	0.680369	0.719876	0.742449	0.839616	0.673906	0.724411	0.904566	1.13381	1.27456	1.41244	1.79993	1.61879	1.5028	1.47622	1.3078	1.39682	1.26093	1.05111	0.89124	0.987472	0.987535	1.04979	0.998363	0.889431
															0.667042	0.638006	0.622872	0.64588	0.746171	0.666731	0.678783	0.659317	0.674305	0.713139	0.662868	0.683476	0.645614	0.627988	0.6842	0.583054	0.733292	0.761483	0.862996	0.98837	1.21888	1.38329	1.52098	1.50679	1.43593	1.45396	1.37687	1.29123	1.3201	1.35912	1.30591	1.34461	1.41714	1.43075	1.4992
																		0.652174	0.607888	0.613781	0.623745	0.626792	0.589979	0.585298	0.607184	0.551717	0.543846	0.551906	0.572141	0.63617	0.823171	1.16874	1.37354	1.3346	1.25846	1.33301	1.31474	1.34641	1.36232	1.40935	1.55438	1.48134	1.43106	1.48269	1.46581	1.59462	1.58602	1.50897	1.57391
																					0.595087	0.626518	0.588804	0.58734	0.605531	0.583126	0.55363	0.555253	0.536566	0.543928	0.521243	0.476881	0.455675	0.502892	0.496196	0.558474	0.782147	1.16543	1.17043	1.20052	1.27417	1.33638	1.16847	1.13975	1.21142	1.2229	1.25279	1.20464	1.2771
0.942108	0.907633	0.909272	0.869429	0.897091	0.866281	0.683867	0.640501	0.532499	0.514197	0.540822	0.547848	0.549467	0.589294	0.565078	0.494966	0.484535	0.511069	0.47937	0.472833	0.493	0.488763	0.503375	0.507321	0.526243	0.528847	0.548104	0.613944	0.585384	0.591658	0.560973	0.582683	0.57228	0.543231	0.593691	0.58364	0.645457	0.73653	0.917814	1.06129	1.15125	1.19783	1.2317	1.31313	1.42258	1.35446	1.29296	1.23711	1.31896	1.22345
0.769937	0.74729	0.753055	0.740392	0.671049	0.609161	0.5451	0.489619	0.476259	0.484191	0.424678	0.400337	0.43359	0.434901	0.414791	0.402607	0.404933	0.419173	0.410495	0.419257	0.399491	0.42436	0.433926	0.41615	0.436225	0.446395	0.426905	0.403727	0.42277	0.425479	0.435434	0.493213	0.703711	0.920152	1.15432	1.13379	1.20757	1.215	1.13604	1.17022	1.06379	1.21684	1.15184	1.19771	1.17756	0.927224	0.932096	0.86808	0.868472	0.811857
0.97569	0.829678	0.851437	0.74656	0.712677	0.659078	0.60625	0.505034	0.565233	0.557392	0.478229	0.495195	0.527949	0.524202	0.530608	0.576341	0.534162	0.538082	0.520121	0.592696	0.622642	0.713374	0.663141	0.651761	0.662338	0.591323	0.616119	0.558985	0.606851	0.647346	0.566581	0.553618	0.50364	0.510177	0.47589	0.461537	0.448212	0.445467	0.418706	0.476011	0.504062	0.653727	0.860868	0.976934	0.993433	1.04442	1.05953	1.14553	1.1889	1.17088
0.757159	0.679298	0.643551	0.598449	0.561807	0.547486	0.552933	0.53495	0.504543	0.490298	0.430898	0.405098	0.387047	0.386929	0.413102	0.391721	0.367114	0.374023	0.36318	0.323807	0.325769	0.306273	0.326102	0.331141	0.333815	0.331467	0.332469	0.315731	0.315501	0.312876	0.322077	0.371194	0.681772	0.952093	1.00295	0.971763	0.977879	0.953561	0.948247	0.9962	1.00817	1.05782	1.08519	1.16709	1.27276	1.24784	1.2275	1.27057	1.25587	1.24486
0.696757	0.705399	0.723662	0.753268	0.710792	0.608324	0.577034	0.497309	0.524171	0.452942	0.469657	0.474791	0.456074	0.433594	0.46821	0.442642	0.418504	0.380303	0.366098	0.406064	0.361059	0.387984	0.375334	0.373787	0.357607	0.358265	0.370813	0.353493	0.354367	0.376415	0.37367	0.35783	0.363543	0.347515	0.327797	0.334945	0.370626	0.364987	0.437152	0.5151	0.726008	1.03171	1.1385	1.16546	1.19814	1.18236	1.25162	1.24076	1.28467	1.34012
0.870141	0.847644	0.895461	0.89047	0.872221	0.831609	0.777466	0.823078	0.732881	0.708648	0.605214	0.582541	0.606633	0.615331	0.55711	0.556961	0.545646	0.546267	0.536141	0.592873	0.598245	0.584929	0.574628	0.585006	0.563719	0.572219	0.562123	0.551723	0.556659	0.575627	0.558004	0.556501	0.589167	0.600131	0.587385	0.579581	0.65286	0.922777	1.27082	1.25934	1.22317	1.14302	1.02525	1.03766	0.997983	1.01195	1.01333	1.03994	1.1616	1.29377
																							0.559787	0.488742	0.481852	0.48388	0.471953	0.479469	0.462997	0.451258	0.475177	0.481521	0.437054	0.516241	0.56508	0.561354	0.577723	0.593931	0.573159	0.562071	0.539724	0.56399	0.501533	0.524175	0.495995	0.534373	0.51962	0.570653	0.721878
0.923209	0.839236	0.797654	0.735715	0.670151	0.566404	0.606566	0.648612	0.589989	0.625262	0.573505	0.481769	0.537172	0.54072	0.567144	0.546062	0.547872	0.634964	0.564691	0.564995	0.53338	0.53621	0.533134	0.59875	0.575877	0.536625	0.513261	0.483883	0.493568	0.592956	0.706096	0.805061	0.884889	0.969015	1.02339	1.0956	1.10135	1.10615	1.1288	1.15407	1.26567	1.26697	1.22069	1.15977	1.21485	1.2159	1.16994	1.25053	1.25336	1.27018
0.926309	0.818327	0.780674	0.764455	0.754564	0.67629	0.675274	0.603152	0.573749	0.538286	0.514694	0.50184	0.499555	0.474685	0.474676	0.469213	0.463539	0.473418	0.425797	0.428008	0.411475	0.398984	0.424196	0.428956	0.428025	0.415945	0.418145	0.403566	0.396812	0.408166	0.400653	0.411796	0.414804	0.404836	0.40318	0.395621	0.392186	0.397352	0.394417	0.504097	0.788907	0.974393	1.03442	0.994237	0.956661	0.971613	0.992422	1.06106	1.10271	1.18386
0.981732	0.877813	0.84535	0.877792	0.812472	0.802911	0.721321	0.803538	0.762586	0.600875	0.636647	0.653263	0.651652	0.748652	0.694421	0.725828	0.758694	0.766808	0.721887	0.747581	0.680009	0.689436	0.621157	0.595732	0.592605	0.620105	0.554319	0.642111	0.559745	0.621486	0.56962	0.58217	0.631861	0.639205	0.574005	0.514854	0.5227	0.541132	0.578416	0.68102	0.72566	0.865541	1.04117	1.08441	0.989213	1.04506	1.06851	1.10961	1.13936	1.19395
												0.462302	0.479934	0.518394	0.567655	0.538608	0.553712	0.592703	0.554456	0.554357	0.521922	0.54114	0.531761	0.511558	0.497923	0.481653	0.500937	0.502874	0.546625	0.533615	0.543312	0.51515	0.555443	0.69719	0.993548	1.19449	1.21656	1.26477	1.31179	1.37752	1.30612	1.27363	1.21292	1.22269	1.24983	1.08422	1.09966	1.21396	1.18727
0.593301	0.565693	0.511482	0.463438	0.43967	0.420047	0.433715	0.383623	0.400512	0.374678	0.359903	0.387998	0.411738	0.42095	0.436517	0.406722	0.391808	0.437189	0.406605	0.414399	0.386762	0.361684	0.376157	0.354801	0.364554	0.339338	0.353014	0.373178	0.389539	0.415062	0.465081	0.497019	0.460692	0.388334	0.400995	0.417115	0.420655	0.395704	0.415384	0.433168	0.491073	0.54921	0.612401	0.684222	0.77556	0.867211	0.82646	0.805902	0.816601	0.896642
0.802757	0.700856	0.620962	0.576082	0.489679	0.483386	0.509307	0.429862	0.43928	0.423326	0.376736	0.350531	0.34789	0.347051	0.352681	0.338335	0.323866	0.313453	0.328637	0.328724	0.337965	0.306083	0.298058	0.325304	0.305505	0.327116	0.302887	0.310862	0.320683	0.282815	0.288048	0.302577	0.3078	0.304509	0.294227	0.294341	0.305344	0.264086	0.269811	0.274691	0.275858	0.283011	0.277156	0.278705	0.274065	0.302867	0.337537	0.426172	0.807017	1.12588
0.432973	0.385415	0.375734	0.333424	0.351205	0.346004	0.344794	0.349929	0.354411	0.37075	0.337094	0.367376	0.318651	0.2963	0.317279	0.311929	0.327618	0.36783	0.362331	0.375988	0.387888	0.432894	0.445989	0.444032	0.444757	0.439099	0.432201	0.402417	0.423834	0.415205	0.388933	0.391876	0.376712	0.387235	0.385827	0.39731	0.404792	0.445047	0.404273	0.411584	0.417352	0.408574	0.439627	0.61187	0.867079	0.931709	1.06509	1.01057	1.00949	0.982023
0.806861	0.729256	0.787337	0.880062	0.795636	0.69326	0.714558	0.699341	0.642266	0.617822	0.597625	0.603105	0.586155	0.596165	0.583287	0.565259	0.551584	0.599151	0.527047	0.528357	0.518639	0.525902	0.531913	0.621778	0.571174	0.641327	0.592596	0.592463	0.579724	0.665657	0.634498	0.62589	0.63466	0.71458	1.04405	1.22156	1.30915	1.33779	1.23744	1.26183	1.23947	1.34468	1.33491	1.40012	1.44998	1.46394	1.42285	1.3104	1.3463	1.27119
0.688046	0.665508	0.659136	0.673339	0.580711	0.579705	0.580297	0.557985	0.551309	0.508597	0.504078	0.486309	0.477062	0.490856	0.468177	0.464104	0.475123	0.441724	0.463145	0.476453	0.479272	0.488283	0.459249	0.437901	0.44553	0.432932	0.420342	0.416089	0.418125	0.421788	0.416127	0.411655	0.412947	0.41462	0.414004	0.423343	0.409869	0.426894	0.450836	0.458167	0.545858	0.682101	0.980237	1.10286	1.15975	1.06899	1.02965	0.985248	0.971953	0.988383
0.692537	0.66779	0.611456	0.553208	0.607985	0.626726	0.671697	0.668736	0.681996	0.669309	0.635902	0.62799	0.602283	0.617787	0.587648	0.614933	0.628788	0.595902	0.582449	0.555638	0.525974	0.528986	0.530057	0.550047	0.572216	0.580826	0.598449	0.584162	0.632258	0.5893	0.575228	0.519596	0.520247	0.540505	0.606748	0.597868	0.717035	0.809165	0.969107	0.98453	1.01038	1.0094	1.01196	1.05105	1.00455	1.07064	1.16058	1.29081	1.2669	1.23091
0.60858	0.63823	0.58299	0.585473	0.644471	0.605253	0.570894	0.536201	0.546878	0.446456	0.459739	0.428915	0.449592	0.424155	0.442074	0.414053	0.440074	0.431495	0.423748	0.440582	0.415364	0.393734	0.420101	0.411527	0.440921	0.434726	0.392296	0.405571	0.361425	0.347286	0.361681	0.365401	0.414123	0.473483	0.766313	0.942442	0.978568	0.918413	0.941299	0.90861	0.915329	0.890624	0.910191	0.964382	1.06556	1.05933	0.96026	1.02705	1.11094	1.11142
0.911189	0.832821	0.804019	0.722868	0.654904	0.722379	0.601401	0.552191	0.518784	0.478203	0.436087	0.435384	0.442114	0.430825	0.410111	0.475779	0.473081	0.464104	0.511737	0.506624	0.467345	0.454434	0.45836	0.476197	0.451063	0.487395	0.539776	0.550145	0.509827	0.553737	0.535694	0.483347	0.47943	0.458875	0.51545	0.536085	0.56689	0.603759	0.613845	0.548291	0.534807	0.571058	0.575508	0.706137	0.823335	0.845028	0.87444	0.878231	0.966523	1.01049
																									0.774026	0.717808	0.746498	0.721194	0.63169	0.670614	0.713066	0.657727	0.600801	0.648113	0.689295	0.725401	0.830937	0.758445	0.831178	0.960513	0.956702	1.02332	1.05963	1.03887	1.03587	1.18619	1.10817	1.2277	1.20646
																								0.623525	0.601769	0.584992	0.563386	0.587893	0.591407	0.589763	0.642144	0.616696	0.669698	0.799285	1.04616	1.20954	1.22211	1.22366	1.24732	1.21401	1.22124	1.2482	1.17727	1.18267	1.26155	1.29063	1.23751	1.25282	1.3683
0.723317	0.644158	0.564946	0.534737	0.512167	0.534615	0.530276	0.522019	0.544968	0.529625	0.505375	0.509489	0.53526	0.521197	0.492009	0.47985	0.499148	0.45156	0.498787	0.505526	0.491579	0.479585	0.506154	0.496699	0.517727	0.505205	0.466471	0.526963	0.516507	0.53585	0.537693	0.566071	0.570167	0.559667	0.611498	0.770168	0.880563	0.939397	0.941009	0.923584	0.868384	0.929937	1.0144	1.06023	1.15622	1.10452	1.14921	1.1324	1.14135	1.11927
0.713065	0.824347	0.803069	0.867634	0.780925	0.72166	0.703162	0.638188	0.618268	0.547498	0.537969	0.495072	0.488941	0.413696	0.407227	0.406025	0.401513	0.397613	0.400499	0.372135	0.398909	0.406133	0.442297	0.436429	0.455641	0.412812	0.38722	0.393457	0.405056	0.443242	0.602715	0.787756	0.874737	0.862178	0.821251	0.844475	0.839085	0.842518	0.872095	0.895908	0.943548	1.10299	1.1737	1.27576	1.20071	1.22211	1.24126	1.25859	1.28466	1.2734
0.836281	0.713344	0.694385	0.614667	0.656642	0.62542	0.589349	0.524009	0.510228	0.450879	0.430702	0.42792	0.405278	0.384435	0.419043	0.38351	0.355487	0.385919	0.39372	0.404565	0.407919	0.418983	0.409677	0.415372	0.411441	0.390973	0.378646	0.383295	0.369899	0.396107	0.353349	0.34881	0.356959	0.361752	0.3491	0.379262	0.460468	0.561402	0.675981	0.785954	0.886588	0.91108	0.949534	0.99479	1.00043	1.01558	1.03603	1.06262	1.06997	1.11789
0.951294	0.856682	0.758771	0.726932	0.656393	0.593929	0.59387	0.559148	0.547965	0.527498	0.511283	0.476554	0.486428	0.479929	0.496485	0.506794	0.539055	0.509341	0.498944	0.485439	0.49922	0.51904	0.521593	0.513284	0.514822	0.465351	0.479947	0.487174	0.474137	0.443261	0.43405	0.447128	0.429105	0.433755	0.412764	0.405724	0.416055	0.436392	0.409956	0.455418	0.644662	0.975684	1.08531	1.19212	1.22643	1.24786	1.23836	1.27799	1.33256	1.37135
0.92624	0.857974	0.892604	0.960244	0.874309	0.771936	0.742531	0.679499	0.608505	0.558756	0.535657	0.532365	0.543467	0.508035	0.500225	0.492811	0.487643	0.474291	0.480744	0.478616	0.454778	0.477195	0.480373	0.46749	0.4276	0.426096	0.505359	0.506648	0.502117	0.555224	0.564106	0.52053	0.560234	0.588312	0.560561	0.594943	0.603259	0.632503	0.714074	0.771233	0.801573	0.781872	0.785375	0.852421	0.793897	0.720764	0.775606	0.728705	0.738773	0.829361
0.827179	0.74239	0.729679	0.611682	0.631923	0.578078	0.586842	0.559865	0.474479	0.488491	0.505725	0.508878	0.428757	0.471679	0.472262	0.525846	0.523199	0.482775	0.480385	0.492454	0.466972	0.481796	0.457172	0.460696	0.475307	0.461004	0.455982	0.460082	0.458775	0.457065	0.445695	0.451983	0.421842	0.407406	0.421904	0.39152	0.385024	0.449011	0.495105	0.561718	0.676358	0.791537	0.935566	0.986825	1.10504	1.1089	1.14579	1.2051	1.20059	1.24596
															0.668914	0.783866	0.773095	0.75471	0.895778	0.756177	0.758921	0.857098	0.820743	0.852572	0.764122	0.819426	0.756019	0.738032	0.805196	0.771462	0.778826	0.878525	0.887359	0.810836	0.828991	0.787784	0.795253	0.832916	0.799133	0.815576	0.758445	0.757495	0.790329	0.830884	0.868674	0.846357	1.05281	1.24621	1.30514
																0.507412	0.556762	0.566946	0.634626	0.618921	0.618175	0.516815	0.528159	0.528037	0.561718	0.457556	0.555283	0.541879	0.519913	0.514835	0.470147	0.551236	0.564475	0.595219	0.578806	0.537675	0.665502	0.688238	0.788926	0.917745	0.839044	0.890811	1.03438	1.15378	1.19575	1.0217	0.969003	0.955942	0.95059
0.635873	0.567801	0.445511	0.502585	0.511759	0.464274	0.444459	0.420318	0.432664	0.435579	0.405728	0.372852	0.374277	0.355073	0.340743	0.329225	0.365116	0.400663	0.38975	0.416853	0.397012	0.385047	0.405655	0.397578	0.472962	0.411354	0.392857	0.393375	0.379615	0.438966	0.451126	0.459967	0.473922	0.453339	0.464617	0.49004	0.498442	0.502906	0.490183	0.5002	0.585396	0.791074	1.05818	1.1744	1.14751	1.12549	1.15133	1.15354	1.0813	1.19417
0.609734	0.506539	0.479879	0.448995	0.446635	0.43462	0.40131	0.399774	0.413544	0.393158	0.399859	0.355676	0.372451	0.382813	0.407961	0.392254	0.426063	0.474224	0.483501	0.454639	0.400645	0.381738	0.408228	0.429252	0.428714	0.472128	0.409579	0.43694	0.452633	0.377708	0.327076	0.295248	0.322824	0.331708	0.324038	0.360728	0.495566	0.721788	0.879132	0.858967	0.952891	1.02497	1.22133	1.4582	1.49891	1.5696	1.57365	1.6574	1.5984	1.60163
0.815938	0.862344	0.890002	0.831908	0.895036	0.824447	0.812055	0.889917	0.920797	0.797543	0.785582	0.753685	0.709769	0.654825	0.625648	0.549656	0.475084	0.412994	0.403286	0.422048	0.382469	0.35609	0.34334	0.369881	0.373573	0.327897	0.341613	0.345312	0.359449	0.340832	0.354057	0.39369	0.405879	0.436156	0.38466	0.418566	0.442116	0.505279	0.699895	0.998578	1.05912	0.947345	0.980609	1.07771	0.948295	0.863542	0.913881	0.959142	1.06992	1.15616
0.991621	0.990931	0.92956	0.898485	0.904899	0.834325	0.903084	0.879148	0.812391	0.790143	0.751654	0.707806	0.730319	0.679439	0.715462	0.695946	0.681394	0.669307	0.646935	0.639289	0.595854	0.614774	0.610756	0.604002	0.59579	0.573095	0.60225	0.590452	0.545439	0.552581	0.560506	0.541458	0.517487	0.537016	0.539525	0.506059	0.526158	0.545759	0.589985	0.89008	1.1485	1.22706	1.17508	1.22381	1.16551	1.18808	1.21016	1.22085	1.23606	1.23092
																	0.457921	0.495631	0.506175	0.537087	0.481589	0.541562	0.516308	0.528493	0.581186	0.526986	0.537717	0.543882	0.53939	0.495261	0.514241	0.537154	0.530709	0.532797	0.526374	0.532061	0.523183	0.541203	0.528397	0.634965	0.696618	0.711513	0.805961	0.758686	0.942755	1.00176	1.05979	1.07785	1.16428
0.618877	0.63644	0.614003	0.646732	0.58593	0.52185	0.553496	0.603257	0.661358	0.644224	0.635793	0.592215	0.632857	0.627202	0.692367	0.6427	0.573597	0.572346	0.536952	0.534147	0.551707	0.574048	0.484725	0.488161	0.455431	0.424852	0.425453	0.403383	0.39108	0.368944	0.328204	0.356472	0.358305	0.320811	0.338619	0.413558	0.407264	0.46647	0.589786	0.718844	0.705556	0.922009	0.896573	1.00689	0.989119	1.11672	1.23638	1.21679	1.16604	1.11318
			0.658811	0.647287	0.676358	0.650072	0.742744	0.808464	0.830918	0.832344	0.744372	0.693778	0.674984	0.557333	0.623939	0.587095	0.666736	0.586308	0.623053	0.660841	0.652529	0.615138	0.640866	0.667972	0.700387	0.737775	0.670197	0.717168	0.700622	0.770353	1.02712	0.951717	0.946839	0.945851	0.950421	0.929358	0.970351	1.00081	1.00775	1.091	1.10324	1.1716	1.19961	1.16871	1.16415	1.43619	1.41608	1.29029	1.33554
0.923233	0.852299	0.768822	0.781895	0.750766	0.715108	0.69246	0.645161	0.709292	0.747614	0.685252	0.687454	0.674183	0.708833	0.617955	0.622279	0.587548	0.556608	0.596149	0.558189	0.484524	0.507279	0.470423	0.54212	0.601181	0.566223	0.578447	0.583546	0.521624	0.551458	0.543079	0.468949	0.478987	0.503125	0.471177	0.467971	0.532646	0.601175	0.646711	0.694099	1.00574	1.15861	1.16719	1.10538	1.0887	0.992338	1.11066	1.07826	1.12142	1.15524
0.876175	0.746722	0.738874	0.602814	0.608218	0.564872	0.547813	0.553009	0.552805	0.548874	0.517304	0.533685	0.507415	0.47993	0.452692	0.463586	0.439881	0.49698	0.488851	0.497585	0.495669	0.503735	0.489552	0.505583	0.448853	0.487085	0.479677	0.492848	0.506393	0.498939	0.542406	0.588326	0.679542	0.858886	0.934983	0.980527	1.0379	1.11568	1.14023	1.16642	1.15482	1.27707	1.32273	1.31237	1.28699	1.3511	1.3487	1.34056	1.28957	1.28578
		0.376752	0.388962	0.343944	0.33099	0.295202	0.271015	0.2587	0.231518	0.216094	0.22122	0.211911	0.221674	0.222306	0.232631	0.230597	0.235354	0.22054	0.212342	0.205223	0.195638	0.21304	0.208807	0.199658	0.212036	0.217818	0.218571	0.232156	0.205649	0.197764	0.208078	0.221747	0.214591	0.228633	0.248024	0.235542	0.246361	0.270337	0.307824	0.394161	0.465919	0.575628	0.675869	0.739243	0.868402	1.05121	1.05159	1.05081	1.1179
0.896475	0.857816	0.767817	0.722969	0.663102	0.686061	0.608542	0.691609	0.661537	0.60781	0.614978	0.595451	0.541794	0.566128	0.519773	0.461831	0.523377	0.473579	0.523492	0.507725	0.501252	0.502587	0.514233	0.492243	0.53252	0.459674	0.50083	0.498237	0.501047	0.519022	0.524005	0.55247	0.556075	0.559606	0.558067	0.585484	0.788962	1.02288	1.04392	0.999118	0.949873	0.998446	0.992656	0.999784	0.925134	1.00665	1.07625	1.07493	1.12271	1.12792
0.676667	0.760739	0.842144	0.660079	0.659416	0.636773	0.619253	0.553892	0.587126	0.568973	0.525796	0.530506	0.55231	0.597778	0.592805	0.579802	0.560156	0.53344	0.525509	0.489419	0.467928	0.459153	0.460031	0.439169	0.35337	0.362152	0.364081	0.34985	0.420448	0.441332	0.5141	0.505858	0.508427	0.484816	0.449973	0.444544	0.422707	0.435183	0.435914	0.46257	0.578652	0.892345	1.04138	1.0976	1.13041	1.0409	1.02679	0.991544	0.949855	0.935298
0.563412	0.545843	0.572512	0.537095	0.589899	0.52831	0.5766	0.579224	0.565051	0.565143	0.548517	0.551704	0.509968	0.454326	0.463286	0.464419	0.519376	0.500737	0.498877	0.537793	0.605847	0.597045	0.594911	0.610554	0.563032	0.614254	0.573757	0.613399	0.581463	0.562031	0.59131	0.559354	0.506584	0.467199	0.431095	0.423475	0.453462	0.452579	0.482103	0.508294	0.569892	0.584096	0.627422	0.658712	0.731924	0.725321	0.747744	0.725779	0.720815	0.853673
0.67759	0.599239	0.544437	0.624536	0.557564	0.648346	0.632462	0.588881	0.593553	0.561923	0.542021	0.496021	0.550838	0.500316	0.591694	0.554299	0.568926	0.573164	0.55829	0.506001	0.518376	0.50234	0.520154	0.516235	0.555658	0.539028	0.551733	0.577866	0.574711	0.572809	0.572882	0.678934	0.809139	0.913237	0.973256	0.997634	1.05495	1.07364	1.07675	1.13372	1.15093	1.2174	1.19579	1.18991	1.14239	1.24285	1.17494	1.26214	1.369	1.39127
0.791273	0.721579	0.614737	0.632243	0.606564	0.569972	0.517395	0.539547	0.506043	0.500747	0.461543	0.480063	0.50281	0.459397	0.45013	0.465922	0.450878	0.484088	0.394197	0.450215	0.385777	0.405687	0.385623	0.359081	0.377285	0.362791	0.370399	0.38051	0.373903	0.374482	0.394277	0.37622	0.389916	0.395455	0.383561	0.40038	0.36013	0.336967	0.342653	0.346844	0.389683	0.478053	0.8784	1.20425	1.28113	1.30171	1.32784	1.2716	1.2798	1.23847
								0.831433	0.761279	0.766114	0.703409	0.651498	0.617753	0.638716	0.627903	0.627375	0.600369	0.564753	0.574948	0.567683	0.605074	0.627375	0.635277	0.57776	0.554083	0.506851	0.492736	0.503731	0.48752	0.475684	0.463284	0.455295	0.480256	0.510458	0.474744	0.423919	0.443828	0.397381	0.452925	0.517782	0.535426	0.666635	0.77998	0.774055	0.866229	0.952854	0.984271	0.947345	0.970912
[truncated: 25 more columns]

## Sheet: CDK2 III(60uM)_G1 (CDK2)
Time since mitogen stimulation (hr)
0.2	0.4	0.6	0.8	1	1.2	1.4	1.6	1.8	2	2.2	2.4	2.6	2.8	3	3.2	3.4	3.6	3.8	4	4.2	4.4	4.6	4.8	5	5.2	5.4	5.6	5.8	6	6.2	6.4	6.6	6.8	7	7.2	7.4	7.6	7.8	8	8.2	8.4	8.6	8.8	9	9.2	9.4	9.6	9.8	10
0.492661	0.497449	0.462495	0.460737	0.459019	0.457816	0.43726	0.420557	0.390189	0.401592	0.359476	0.357089	0.350693	0.330982	0.297859	0.299113	0.292493	0.277115	0.272253	0.274365	0.282951	0.288674	0.300521	0.306602	0.311897	0.308906	0.310104	0.29882	0.30106	0.278438	0.276198	0.285642	0.267484	0.271	0.277298	0.273266	0.272171	0.27595	0.264974	0.264739	0.283555	0.262296	0.266991	0.267939	0.287507	0.288038	0.310487	0.353599	0.398819	0.457053
0.574427	0.551239	0.52257	0.509801	0.48278	0.485211	0.471764	0.462341	0.476074	0.493775	0.485245	0.467574	0.493693	0.468647	0.465415	0.4644	0.487969	0.476868	0.467858	0.461763	0.442631	0.428877	0.452582	0.41883	0.417236	0.405042	0.398663	0.381861	0.363436	0.361998	0.356987	0.370895	0.389613	0.360362	0.376645	0.360576	0.360492	0.339893	0.346543	0.356838	0.345037	0.365623	0.370831	0.387062	0.39974	0.444586	0.471917	0.497499	0.566973	0.592714
0.372585	0.354791	0.355669	0.381371	0.383222	0.385368	0.367266	0.360527	0.354221	0.35711	0.375871	0.366466	0.369203	0.38361	0.391498	0.371189	0.360033	0.353118	0.339156	0.335094	0.324802	0.330875	0.323322	0.333833	0.325193	0.317382	0.32088	0.30646	0.306832	0.292099	0.277064	0.262465	0.258544	0.255274	0.249781	0.258762	0.265003	0.269179	0.278313	0.278911	0.293469	0.337846	0.375442	0.449237	0.499452	0.545873	0.560516	0.593748	0.685402	0.697236
0.562834	0.574284	0.511606	0.48784	0.471633	0.515247	0.471888	0.535811	0.483962	0.47301	0.448845	0.433394	0.407587	0.388966	0.401059	0.415244	0.420682	0.398812	0.374991	0.368414	0.355351	0.340507	0.33783	0.338279	0.332433	0.33395	0.328336	0.314403	0.291683	0.292563	0.309181	0.305078	0.31503	0.303143	0.307498	0.321933	0.321533	0.34467	0.337224	0.32375	0.336069	0.33946	0.356517	0.376012	0.406579	0.460981	0.528099	0.590423	0.618468	0.648798
0.449458	0.408324	0.430218	0.435929	0.427243	0.453541	0.443016	0.458309	0.47618	0.4694	0.460804	0.42775	0.428235	0.433611	0.44825	0.443586	0.42494	0.432786	0.411766	0.413325	0.41526	0.398604	0.396184	0.398947	0.387163	0.371438	0.398554	0.360509	0.356028	0.31908	0.3503	0.365435	0.343502	0.340027	0.367737	0.338886	0.334198	0.320435	0.314155	0.322717	0.310564	0.330298	0.319965	0.376141	0.390177	0.411934	0.43596	0.475271	0.518819	0.649485
0.449923	0.459169	0.432767	0.425514	0.427429	0.413214	0.42346	0.406557	0.407347	0.4182	0.398121	0.398277	0.392837	0.414669	0.406146	0.436703	0.43758	0.458395	0.447409	0.448296	0.451202	0.465714	0.467452	0.470511	0.471999	0.466541	0.449588	0.460555	0.438493	0.418822	0.395146	0.401159	0.404606	0.41913	0.409604	0.432387	0.466207	0.5227	0.572809	0.610791	0.699828	0.665714	0.724365	0.758554	0.802382	0.780534	0.786218	0.820074	0.769104	0.801261
0.56381	0.584339	0.570732	0.579233	0.538374	0.522551	0.534264	0.51448	0.48609	0.490383	0.473478	0.459421	0.471197	0.432122	0.43127	0.425335	0.435434	0.463638	0.462137	0.487395	0.458996	0.449774	0.469075	0.470495	0.476483	0.464234	0.441079	0.44612	0.431141	0.455972	0.448457	0.45912	0.478868	0.468815	0.469522	0.454321	0.450243	0.431364	0.431134	0.442548	0.467093	0.461055	0.410845	0.435537	0.43838	0.471589	0.536386	0.609681	0.66312	0.731393
0.497039	0.489194	0.463168	0.448081	0.415067	0.445203	0.435363	0.442745	0.428821	0.413294	0.395753	0.368864	0.379304	0.366701	0.359576	0.370565	0.374519	0.379291	0.366898	0.362305	0.372382	0.3672	0.367794	0.374456	0.384076	0.359496	0.344808	0.366813	0.386811	0.370121	0.388578	0.389551	0.382205	0.365362	0.373434	0.365022	0.34785	0.35161	0.345188	0.344005	0.349488	0.357627	0.337203	0.371888	0.360899	0.402844	0.422348	0.468642	0.522493	0.609132
								0.548218	0.521953	0.518842	0.497994	0.471043	0.480824	0.506277	0.516011	0.471588	0.477982	0.506287	0.46785	0.470029	0.444067	0.444755	0.460821	0.45355	0.454631	0.416361	0.417824	0.421088	0.401897	0.409224	0.388065	0.38795	0.380513	0.376154	0.374674	0.373926	0.39294	0.388018	0.404562	0.398341	0.384429	0.392049	0.414403	0.436394	0.46298	0.469973	0.524826	0.576695	0.674018
														0.543931	0.558038	0.558635	0.553181	0.557029	0.587865	0.555634	0.585631	0.580476	0.570253	0.588888	0.59801	0.578866	0.582873	0.568111	0.521954	0.523307	0.504609	0.50164	0.481004	0.489519	0.511017	0.501845	0.469532	0.465176	0.452581	0.468096	0.463492	0.454837	0.44547	0.447813	0.457112	0.449543	0.464334	0.477931	0.485202
																				0.538129	0.517907	0.514613	0.505654	0.49136	0.474452	0.488239	0.489244	0.489954	0.474531	0.494244	0.517767	0.502479	0.514283	0.524043	0.528452	0.550539	0.54602	0.56256	0.547651	0.540202	0.538468	0.540577	0.550281	0.568351	0.574657	0.580983	0.588818	0.613297	0.61585
																						0.505815	0.565253	0.534246	0.507392	0.51128	0.447366	0.406204	0.393475	0.377239	0.382429	0.373988	0.377281	0.367209	0.3501	0.343778	0.360624	0.370201	0.38819	0.389792	0.402345	0.409466	0.400361	0.418863	0.459236	0.545225	0.614124	0.704727	0.755098
0.58279	0.618999	0.583061	0.574216	0.560826	0.560406	0.569099	0.551829	0.49286	0.484871	0.485222	0.488995	0.522073	0.535425	0.493435	0.503138	0.527126	0.485416	0.472518	0.442763	0.459699	0.446994	0.452686	0.462112	0.434201	0.439823	0.428425	0.420852	0.398606	0.405319	0.402128	0.382775	0.37502	0.376164	0.362554	0.373342	0.380074	0.385408	0.397958	0.409152	0.399393	0.424896	0.427397	0.430563	0.438766	0.431649	0.487572	0.542269	0.584923	0.716877
0.597859	0.602496	0.583956	0.557025	0.564475	0.551388	0.527133	0.535043	0.481685	0.463743	0.437081	0.414545	0.382948	0.387391	0.391436	0.40034	0.391854	0.381003	0.396684	0.403187	0.394332	0.390954	0.397932	0.398621	0.393439	0.38096	0.405592	0.393698	0.406115	0.410282	0.412359	0.422548	0.413406	0.408515	0.391797	0.40856	0.387405	0.412138	0.421911	0.422773	0.424242	0.445698	0.465627	0.487221	0.524543	0.561116	0.579232	0.596609	0.657907	0.708207
0.550295	0.576047	0.543233	0.557697	0.528815	0.549456	0.553437	0.520922	0.555682	0.531096	0.526855	0.540465	0.543028	0.553911	0.532585	0.538393	0.566225	0.576576	0.602259	0.58279	0.57591	0.572571	0.552279	0.511715	0.488712	0.489299	0.480908	0.491125	0.479804	0.490309	0.488223	0.477841	0.475232	0.485721	0.499162	0.513262	0.539041	0.570236	0.594026	0.573132	0.534284	0.507874	0.499027	0.460839	0.476909	0.460663	0.505362	0.577075	0.647984	0.663179
0.586873	0.595226	0.554662	0.561998	0.54166	0.549171	0.529189	0.506331	0.524445	0.510403	0.470648	0.45536	0.453877	0.447004	0.42215	0.459469	0.457897	0.437878	0.428531	0.408401	0.411921	0.393838	0.384237	0.390196	0.378886	0.392031	0.382894	0.381828	0.381137	0.392589	0.38471	0.387416	0.399959	0.374848	0.377457	0.362333	0.368444	0.372779	0.374829	0.366422	0.369099	0.377413	0.404236	0.402109	0.420142	0.458156	0.482547	0.548151	0.601336	0.677045
0.538842	0.516445	0.484471	0.48953	0.479787	0.474926	0.481785	0.48137	0.468135	0.482678	0.45639	0.476244	0.451493	0.459029	0.474552	0.490838	0.488984	0.481176	0.489356	0.493699	0.482175	0.492784	0.47681	0.460027	0.466369	0.463889	0.47321	0.457362	0.463805	0.483336	0.464846	0.46545	0.445931	0.436239	0.438144	0.419374	0.412636	0.401899	0.399934	0.420266	0.417644	0.407804	0.423726	0.426083	0.408843	0.452481	0.484368	0.496966	0.479199	0.509017
0.491921	0.524094	0.513453	0.498011	0.529344	0.525385	0.491405	0.495283	0.486919	0.458877	0.512693	0.495443	0.462061	0.427947	0.371811	0.389696	0.37711	0.360638	0.352817	0.346826	0.336682	0.371544	0.350785	0.357309	0.339879	0.362043	0.346061	0.345725	0.354934	0.374563	0.336415	0.342882	0.329097	0.380686	0.379485	0.307327	0.286021	0.288229	0.311516	0.324584	0.333577	0.365781	0.37133	0.426097	0.471401	0.516919	0.53574	0.579158	0.657122	0.662817
0.54347	0.562459	0.552465	0.581908	0.582052	0.546622	0.516187	0.506213	0.532182	0.504458	0.483907	0.506109	0.506567	0.486967	0.484973	0.510691	0.488694	0.496883	0.470842	0.461124	0.445878	0.448126	0.471603	0.443292	0.457727	0.472189	0.475629	0.459439	0.473662	0.478699	0.453349	0.436698	0.425764	0.409239	0.409574	0.40179	0.390278	0.363845	0.351753	0.359818	0.351333	0.360327	0.400354	0.423771	0.463815	0.513851	0.553166	0.592368	0.635188	0.697624
	0.603526	0.574748	0.530214	0.532459	0.513719	0.57036	0.514609	0.529219	0.523278	0.532087	0.537722	0.522833	0.51721	0.537467	0.571999	0.519348	0.498109	0.48043	0.482883	0.477129	0.475647	0.484801	0.456255	0.478787	0.490181	0.488313	0.461846	0.443351	0.421462	0.399916	0.434158	0.40873	0.403012	0.396654	0.392887	0.375763	0.357759	0.365744	0.350513	0.357038	0.349946	0.353277	0.363691	0.427428	0.485659	0.582211	0.698315	0.794126	0.840945
																				0.543905	0.528043	0.524193	0.510885	0.480778	0.506188	0.495582	0.514465	0.49956	0.496151	0.49351	0.502371	0.481718	0.510014	0.518548	0.532981	0.553962	0.537613	0.539855	0.509486	0.525924	0.544971	0.508409	0.50756	0.529809	0.495385	0.494066	0.519109	0.520081	0.53442
0.509214	0.492475	0.510537	0.523335	0.478906	0.488812	0.497337	0.495217	0.451292	0.451387	0.416508	0.415207	0.407642	0.412552	0.41642	0.406551	0.386264	0.384883	0.374915	0.382281	0.387783	0.396777	0.397064	0.405413	0.403652	0.412963	0.41329	0.419971	0.430051	0.420716	0.408434	0.403619	0.415831	0.408234	0.412533	0.410921	0.416912	0.41852	0.417023	0.410522	0.421591	0.408428	0.414303	0.429876	0.498506	0.5584	0.620765	0.675679	0.697805	0.759354
0.548955	0.570468	0.576647	0.545775	0.544399	0.556368	0.558353	0.564236	0.552421	0.546973	0.531859	0.50925	0.507002	0.497829	0.480537	0.475273	0.48537	0.474195	0.479706	0.486302	0.463853	0.44245	0.423251	0.392116	0.408371	0.397187	0.381255	0.397266	0.39218	0.410299	0.411579	0.406684	0.41655	0.423684	0.434653	0.441466	0.427265	0.411997	0.411285	0.406198	0.426451	0.412849	0.432534	0.435901	0.472846	0.506889	0.547053	0.56651	0.60382	0.638952
0.39996	0.439001	0.395999	0.372937	0.357716	0.349265	0.361179	0.333398	0.335941	0.3204	0.336605	0.35827	0.368504	0.36008	0.40429	0.395055	0.395278	0.396656	0.400838	0.384622	0.379925	0.385007	0.404844	0.397489	0.381963	0.384698	0.372313	0.404524	0.393463	0.350156	0.337399	0.343365	0.347434	0.329812	0.330004	0.354807	0.351718	0.359174	0.380673	0.370581	0.376158	0.449685	0.49831	0.556962	0.613278	0.685092	0.776309	0.766677	0.79432	0.885769
0.562568	0.608319	0.601903	0.55386	0.537616	0.5081	0.502171	0.494858	0.50476	0.489728	0.468931	0.47782	0.462479	0.452381	0.43943	0.435244	0.411465	0.393413	0.40253	0.416606	0.41496	0.424254	0.393248	0.413341	0.42725	0.397822	0.40322	0.41233	0.405372	0.426589	0.426184	0.421192	0.417123	0.408371	0.382301	0.3839	0.391274	0.388958	0.385799	0.406033	0.414675	0.440174	0.452826	0.49529	0.567332	0.591988	0.644102	0.672526	0.695064	0.692326
0.491669	0.444738	0.411352	0.424963	0.39129	0.400064	0.424981	0.393451	0.401395	0.426298	0.462553	0.475137	0.47655	0.459912	0.438384	0.430373	0.441838	0.445685	0.458282	0.470071	0.455023	0.455702	0.466106	0.475774	0.487749	0.448903	0.445408	0.420242	0.393074	0.390815	0.380763	0.376642	0.367567	0.368166	0.366343	0.369458	0.355583	0.36556	0.389108	0.387696	0.37515	0.343545	0.33566	0.352571	0.343194	0.363655	0.358461	0.373294	0.385706	0.370607
0.428229	0.442739	0.408771	0.425139	0.426341	0.443687	0.424204	0.431795	0.44604	0.471037	0.412933	0.429724	0.428164	0.413009	0.38917	0.40409	0.393924	0.3965	0.388181	0.370955	0.372125	0.363677	0.36243	0.35353	0.330134	0.321056	0.326772	0.313002	0.312976	0.316562	0.309014	0.319225	0.303115	0.305508	0.282813	0.286851	0.278875	0.288618	0.258351	0.266673	0.25514	0.262026	0.266417	0.290649	0.301712	0.286464	0.300372	0.322054	0.344287	0.355923
0.508397	0.541552	0.524928	0.552686	0.525891	0.512276	0.489618	0.479597	0.472893	0.459754	0.463	0.471048	0.451044	0.445972	0.416187	0.420794	0.414086	0.417919	0.408901	0.410219	0.391171	0.431159	0.406297	0.407495	0.409266	0.391853	0.387512	0.386595	0.386317	0.375702	0.389099	0.404632	0.379913	0.36638	0.368547	0.372878	0.372921	0.369938	0.36332	0.36074	0.374499	0.368165	0.371352	0.372065	0.362185	0.349685	0.358889	0.365969	0.368689	0.427076
0.528088	0.555344	0.535804	0.526713	0.481625	0.460689	0.421146	0.411618	0.400143	0.388002	0.39026	0.418052	0.407269	0.3954	0.412009	0.404363	0.404108	0.409634	0.377953	0.371777	0.363987	0.379122	0.380231	0.376909	0.381653	0.36319	0.380923	0.375305	0.366182	0.360735	0.356684	0.360594	0.364641	0.362274	0.368407	0.367923	0.360897	0.385248	0.398316	0.41423	0.439768	0.494811	0.553525	0.613012	0.679698	0.742346	0.838256	0.829849	0.866478	0.891826
					0.627832	0.582944	0.583798	0.562535	0.631798	0.560163	0.571346	0.515736	0.511916	0.487438	0.457489	0.490682	0.523362	0.476428	0.489547	0.494051	0.486629	0.486505	0.455765	0.468017	0.476318	0.454708	0.426357	0.440732	0.423054	0.420405	0.391593	0.400934	0.400543	0.436117	0.434103	0.438085	0.430403	0.430708	0.434851	0.424686	0.426232	0.407147	0.419841	0.422702	0.428814	0.439669	0.461148	0.476062	0.501237
							0.554053	0.569348	0.548283	0.492525	0.502557	0.490004	0.491	0.529204	0.521233	0.51627	0.478561	0.478487	0.472496	0.480536	0.490895	0.509845	0.508313	0.527856	0.493779	0.482068	0.452746	0.474495	0.452534	0.437967	0.438095	0.433008	0.424632	0.428162	0.395666	0.415758	0.408401	0.406941	0.418608	0.419191	0.439607	0.449114	0.455989	0.434722	0.437283	0.457431	0.474692	0.458354	0.46063
											0.370011	0.34162	0.34553	0.355133	0.340729	0.347662	0.360862	0.350084	0.364602	0.358327	0.371629	0.368324	0.370529	0.379054	0.358224	0.365876	0.354462	0.354643	0.366057	0.377879	0.379161	0.387523	0.373363	0.369581	0.364523	0.38039	0.38105	0.375525	0.381743	0.386288	0.395468	0.391217	0.399952	0.407015	0.416356	0.443171	0.468389	0.47628	0.503618
													0.360736	0.35661	0.335867	0.346927	0.325628	0.341595	0.337903	0.336842	0.330321	0.308666	0.309391	0.31208	0.290952	0.313049	0.297659	0.297824	0.28248	0.290087	0.27889	0.290577	0.277237	0.266771	0.283523	0.290925	0.280843	0.283116	0.273279	0.290694	0.280802	0.260749	0.284835	0.292502	0.308222	0.332693	0.352873	0.384088	0.41558
																							0.490245	0.485807	0.484211	0.477687	0.470981	0.460328	0.466545	0.463935	0.44977	0.447134	0.45329	0.455977	0.444417	0.45565	0.437221	0.433789	0.460022	0.467726	0.47054	0.481392	0.484663	0.490877	0.483366	0.487882	0.514728	0.517781	0.545268
0.589362	0.663446	0.611744	0.545048	0.552858	0.611013	0.623418	0.616604	0.589325	0.632082	0.583404	0.563298	0.593934	0.559758	0.598804	0.56117	0.623754	0.568545	0.50789	0.548761	0.507104	0.464716	0.492248	0.486909	0.508136	0.476858	0.456615	0.474723	0.502799	0.540374	0.50166	0.520681	0.519128	0.609723	0.591952	0.564412	0.556766	0.530841	0.554202	0.588347	0.607836	0.608233	0.617736	0.668287	0.73906	0.75579	0.765642	0.800216	0.837734	0.873471
0.361565	0.354134	0.355071	0.352235	0.371738	0.352452	0.359952	0.372692	0.361605	0.35473	0.380527	0.374944	0.361674	0.364381	0.371986	0.387826	0.372719	0.369564	0.371365	0.376644	0.37626	0.380485	0.370153	0.382306	0.394068	0.384622	0.369236	0.369747	0.357298	0.359434	0.352638	0.352316	0.347357	0.35714	0.375418	0.37675	0.357511	0.371351	0.36434	0.381416	0.380641	0.414628	0.450046	0.520175	0.581416	0.609782	0.645697	0.672356	0.670333	0.754602
0.54061	0.54395	0.539786	0.521399	0.506222	0.514599	0.498777	0.514043	0.48639	0.455555	0.446639	0.455318	0.469547	0.448474	0.477242	0.463785	0.455014	0.454784	0.452917	0.452926	0.431215	0.430752	0.418922	0.421357	0.452639	0.42437	0.436513	0.417928	0.40966	0.420095	0.41822	0.433707	0.410758	0.392923	0.406402	0.404575	0.404835	0.410525	0.40388	0.420913	0.427933	0.425248	0.450834	0.455328	0.482468	0.489635	0.542702	0.587644	0.62691	0.680117
0.589701	0.556348	0.539806	0.534055	0.518173	0.547666	0.511899	0.480524	0.524175	0.501664	0.468734	0.454133	0.448686	0.476314	0.454044	0.446831	0.449071	0.447165	0.44896	0.419738	0.417759	0.405271	0.391251	0.374257	0.367988	0.362213	0.363106	0.371887	0.354113	0.349362	0.332758	0.326789	0.330556	0.339939	0.348735	0.330126	0.338563	0.329766	0.334201	0.327506	0.342889	0.365779	0.360292	0.422772	0.453758	0.487739	0.542425	0.619722	0.689519	0.705127
	0.503728	0.498034	0.486173	0.520481	0.551274	0.527929	0.553536	0.546641	0.555131	0.552208	0.554756	0.569145	0.545027	0.555622	0.551629	0.5561	0.558842	0.492708	0.454017	0.427344	0.417727	0.38845	0.376331	0.363625	0.38145	0.373244	0.387563	0.367846	0.376175	0.377677	0.383056	0.373928	0.358404	0.342414	0.350317	0.318767	0.326683	0.356982	0.371917	0.379999	0.393196	0.404049	0.422415	0.474961	0.563431	0.658338	0.749383	0.81452	0.89758
																						0.486095	0.4757	0.473736	0.464266	0.462426	0.448059	0.4445	0.445417	0.454722	0.455581	0.445917	0.447736	0.455364	0.44859	0.445921	0.458874	0.4729	0.478623	0.492888	0.509052	0.533914	0.525422	0.525781	0.518876	0.505097	0.512426	0.522151	0.527317
																						0.488041	0.488132	0.490856	0.469983	0.471683	0.464489	0.465538	0.468168	0.447025	0.437509	0.446078	0.445206	0.427018	0.433807	0.422912	0.437344	0.4345	0.44215	0.43858	0.42358	0.436708	0.425079	0.444118	0.446401	0.457775	0.48407	0.508665	0.586613
																								0.490967	0.472495	0.454712	0.478502	0.455934	0.46272	0.46537	0.445869	0.432853	0.412782	0.408211	0.404835	0.407149	0.407199	0.433329	0.426957	0.421549	0.431652	0.430347	0.434718	0.410684	0.410913	0.427605	0.423404	0.435389	0.442605
0.539596	0.581342	0.59885	0.579909	0.525946	0.51591	0.514599	0.448236	0.40837	0.409152	0.385785	0.39277	0.386628	0.368785	0.392253	0.397519	0.353293	0.364627	0.369166	0.347012	0.368338	0.332844	0.343424	0.321824	0.301933	0.316504	0.314739	0.282327	0.295162	0.289039	0.272081	0.279986	0.279408	0.295529	0.312005	0.288966	0.304248	0.3288	0.333786	0.374958	0.422964	0.482882	0.573578	0.630127	0.713139	0.716561	0.738953	0.78888	0.798411	0.786784
						0.558253	0.566065	0.535101	0.525725	0.5073	0.511354	0.476665	0.482962	0.490678	0.473378	0.474265	0.470109	0.470222	0.458883	0.447708	0.462252	0.465731	0.437066	0.42081	0.409046	0.414027	0.413652	0.409957	0.411653	0.40543	0.410699	0.402476	0.39904	0.431266	0.418541	0.42063	0.436488	0.473767	0.5314	0.594164	0.665654	0.717566	0.758682	0.792969	0.834982	0.818992	0.841089	0.85213	0.876312
0.480811	0.50495	0.477135	0.476567	0.47431	0.467511	0.479634	0.472218	0.459945	0.435574	0.420303	0.431144	0.447422	0.449331	0.448641	0.440064	0.428889	0.399854	0.411551	0.439191	0.436215	0.454176	0.443681	0.435909	0.418829	0.415107	0.429885	0.447183	0.430032	0.419736	0.398522	0.397181	0.400776	0.396182	0.391185	0.372598	0.380983	0.373297	0.390025	0.381145	0.39611	0.441511	0.467778	0.531685	0.6119	0.6542	0.692385	0.708727	0.748224	0.794117
									0.677014	0.656248	0.6247	0.577711	0.575451	0.571914	0.570542	0.5763	0.581883	0.601157	0.59124	0.585936	0.58766	0.582403	0.580668	0.594377	0.601327	0.582545	0.563479	0.590073	0.572664	0.581898	0.555462	0.553596	0.533535	0.507543	0.469597	0.469155	0.468804	0.486324	0.464346	0.460712	0.464089	0.448429	0.455364	0.445483	0.452305	0.449086	0.45671	0.501501	0.558951
0.451739	0.423639	0.389477	0.430371	0.419543	0.443359	0.415227	0.363866	0.372946	0.346727	0.336874	0.32598	0.334295	0.32646	0.314288	0.320804	0.304911	0.287216	0.273655	0.290828	0.273404	0.266909	0.270847	0.259396	0.264198	0.249845	0.255297	0.261953	0.244171	0.261605	0.283729	0.302438	0.283384	0.302894	0.284631	0.271515	0.259374	0.252367	0.263311	0.259904	0.284808	0.288262	0.278735	0.276561	0.316633	0.314424	0.33146	0.33656	0.391058	0.478502
0.542077	0.534543	0.470631	0.488036	0.481268	0.453405	0.418653	0.412315	0.383397	0.391241	0.376243	0.366925	0.35297	0.34618	0.334668	0.319233	0.32009	0.336615	0.336537	0.357983	0.365298	0.357593	0.351849	0.356241	0.32819	0.318004	0.323534	0.304946	0.30352	0.298848	0.294296	0.302736	0.294293	0.293723	0.294435	0.302632	0.312935	0.305119	0.307336	0.312024	0.323614	0.33813	0.35492	0.369201	0.388209	0.385173	0.403582	0.416751	0.44203	0.495006
0.512814	0.493361	0.514918	0.564445	0.602962	0.565205	0.589656	0.633175	0.600173	0.620442	0.641518	0.57092	0.558081	0.565838	0.60292	0.566091	0.527051	0.518536	0.503283	0.536391	0.496903	0.514933	0.480201	0.468435	0.458143	0.45559	0.463744	0.440354	0.44543	0.431546	0.420388	0.428581	0.430627	0.429933	0.416122	0.461535	0.446383	0.487782	0.502168	0.541994	0.584189	0.637118	0.675711	0.703684	0.68121	0.694711	0.74809	0.730617	0.741777	0.778798
0.51516	0.474142	0.468698	0.459549	0.44499	0.424829	0.438164	0.430196	0.428879	0.415669	0.404674	0.411666	0.4258	0.422664	0.432158	0.433306	0.422375	0.443368	0.434904	0.429316	0.415926	0.427488	0.421039	0.412041	0.395664	0.39378	0.40221	0.398954	0.39118	0.391668	0.392128	0.388208	0.409099	0.408492	0.404498	0.402555	0.426992	0.457242	0.461817	0.478025	0.493761	0.450595	0.444288	0.430404	0.42046	0.411513	0.395036	0.422817	0.446347	0.458364
0.542419	0.522076	0.504115	0.442436	0.410643	0.404361	0.408371	0.38825	0.36967	0.357755	0.358037	0.333243	0.345328	0.322185	0.347219	0.335777	0.331853	0.345634	0.348895	0.342296	0.32351	0.322506	0.295436	0.317574	0.310907	0.325155	0.327367	0.33626	0.329365	0.349246	0.353339	0.342518	0.34987	0.35344	0.364479	0.37076	0.371849	0.359705	0.353854	0.368201	0.385737	0.38624	0.391405	0.420708	0.431137	0.433507	0.448215	0.481851	0.57401	0.671931
0.507187	0.506958	0.48484	0.462472	0.456931	0.456499	0.471981	0.465264	0.458249	0.456439	0.429936	0.432742	0.428316	0.419056	0.400664	0.35312	0.380722	0.358468	0.360399	0.36446	0.368115	0.349752	0.353269	0.362441	0.339755	0.35044	0.359932	0.351947	0.354551	0.366373	0.365666	0.376938	0.355859	0.378846	0.385218	0.373469	0.352441	0.349464	0.349619	0.347776	0.344648	0.340051	0.345456	0.364532	0.362764	0.377762	0.373865	0.389953	0.378886	0.435122
0.556258	0.514551	0.511735	0.512141	0.489134	0.548139	0.558008	0.523625	0.549679	0.5249	0.526022	0.545526	0.547261	0.551843	0.526906	0.522727	0.495375	0.479189	0.456657	0.468887	0.458211	0.448952	0.433325	0.444638	0.440216	0.421373	0.424453	0.414013	0.395976	0.413628	0.393682	0.393063	0.397844	0.413988	0.398533	0.396349	0.392757	0.379446	0.38886	0.403206	0.42649	0.409799	0.419223	0.435364	0.437383	0.443083	0.467917	0.474007	0.505425	0.557477
0.444105	0.450118	0.419889	0.407739	0.407885	0.435765	0.444445	0.435331	0.42867	0.4299	0.408394	0.414216	0.413551	0.418588	0.413433	0.409656	0.426296	0.41467	0.423127	0.427787	0.413082	0.38783	0.387526	0.377495	0.373146	0.381589	0.372541	0.376866	0.376609	0.362203	0.370864	0.36617	0.352421	0.350148	0.353375	0.337667	0.316005	0.327269	0.321881	0.318177	0.323881	0.323327	0.339231	0.332003	0.333988	0.335617	0.338155	0.316474	0.350171	0.369257
0.474559	0.464166	0.47302	0.470948	0.470371	0.479685	0.453226	0.422398	0.430261	0.37495	0.364286	0.348075	0.342977	0.335687	0.315568	0.311008	0.328256	0.337818	0.32936	0.328228	0.344631	0.339062	0.322545	0.308914	0.324232	0.325388	0.331835	0.349409	0.355158	0.351569	0.366278	0.366733	0.364882	0.37107	0.369828	0.36959	0.354955	0.355533	0.354039	0.363498	0.433461	0.472587	0.538147	0.581006	0.634265	0.653631	0.723357	0.693346	0.795192	0.840447
0.471232	0.468214	0.445599	0.43779	0.444377	0.442491	0.452943	0.434736	0.419742	0.429811	0.449706	0.472255	0.466838	0.451212	0.436516	0.454845	0.417944	0.407106	0.366141	0.353858	0.330709	0.319578	0.319267	0.286573	0.30705	0.300804	0.306902	0.318866	0.300731	0.309235	0.317316	0.296096	0.287351	0.278083	0.285327	0.284288	0.279187	0.280764	0.279594	0.293255	0.306166	0.306732	0.311939	0.320619	0.335593	0.345442	0.363681	0.388986	0.433056	0.504796
0.563231	0.573683	0.581998	0.573397	0.576768	0.541596	0.512252	0.49562	0.5314	0.516452	0.481359	0.446936	0.4366	0.443678	0.451664	0.463126	0.475439	0.469032	0.447637	0.456586	0.448223	0.438488	0.457076	0.465964	0.476928	0.479569	0.466955	0.46198	0.475551	0.492579	0.503924	0.483854	0.482876	0.483928	0.474744	0.467114	0.430464	0.434305	0.424257	0.405943	0.429906	0.426417	0.419322	0.430222	0.440121	0.466174	0.522907	0.575577	0.665375	0.687009
				0.728375	0.721267	0.719085	0.698151	0.66124	0.678968	0.658964	0.639379	0.653568	0.646209	0.656503	0.613882	0.670907	0.665182	0.62805	0.609014	0.587289	0.574438	0.566186	0.565128	0.547913	0.548517	0.516197	0.509429	0.514283	0.465834	0.478072	0.433715	0.439694	0.40791	0.412824	0.397491	0.40153	0.435297	0.423347	0.432588	0.459821	0.485584	0.487112	0.551264	0.559989	0.565313	0.613687	0.61203	0.661109	0.70978
										0.372423	0.34875	0.369338	0.35223	0.335716	0.333419	0.318941	0.303361	0.299259	0.34017	0.314997	0.299915	0.310134	0.307289	0.322012	0.302463	0.274199	0.28816	0.282683	0.283655	0.2957	0.297799	0.312017	0.295332	0.299927	0.306231	0.320739	0.297294	0.300821	0.301874	0.311783	0.298281	0.321697	0.301577	0.320947	0.332636	0.377931	0.389356	0.414627	0.441793
0.55558	0.579504	0.541706	0.509204	0.466376	0.467826	0.479734	0.470913	0.440544	0.430291	0.400284	0.404577	0.409951	0.405473	0.409255	0.383029	0.386953	0.379167	0.375801	0.338509	0.33896	0.33418	0.334164	0.35167	0.355414	0.347665	0.345046	0.339039	0.331839	0.344092	0.331536	0.336199	0.32363	0.321399	0.316332	0.346734	0.363338	0.362874	0.381751	0.423668	0.446266	0.473614	0.520937	0.555174	0.610617	0.661735	0.736935	0.771778	0.805356	0.847159
0.380673	0.373247	0.327638	0.311015	0.319236	0.318177	0.326266	0.300035	0.301331	0.310936	0.319756	0.323656	0.332987	0.330127	0.321886	0.330146	0.327464	0.319678	0.300764	0.300344	0.308445	0.297335	0.309332	0.311161	0.295688	0.2916	0.266788	0.274226	0.268994	0.286459	0.269293	0.262569	0.268213	0.272127	0.26985	0.273162	0.274368	0.280676	0.250922	0.257318	0.249221	0.257646	0.273156	0.282917	0.281722	0.299854	0.318301	0.356017	0.395235	0.460919
0.570522	0.518295	0.515144	0.518277	0.55279	0.574256	0.543693	0.54587	0.530124	0.480801	0.478674	0.457832	0.44089	0.454163	0.438869	0.44545	0.44753	0.451855	0.451076	0.468801	0.447628	0.443956	0.433999	0.410509	0.435149	0.439818	0.452481	0.452974	0.44188	0.417135	0.409894	0.415248	0.401413	0.406438	0.398974	0.392671	0.398038	0.385462	0.378343	0.391647	0.392674	0.403866	0.434619	0.450972	0.466187	0.491211	0.512971	0.577596	0.636923	0.678487
0.484784	0.49923	0.467585	0.476445	0.442677	0.458805	0.486436	0.445342	0.43034	0.40718	0.400455	0.378114	0.371528	0.349919	0.344616	0.348119	0.341887	0.3547	0.333332	0.381863	0.357502	0.355712	0.354384	0.379864	0.393382	0.379783	0.367251	0.372788	0.368542	0.387827	0.392073	0.379952	0.382043	0.376894	0.36762	0.376146	0.383683	0.381674	0.387692	0.396916	0.431131	0.444307	0.493122	0.497556	0.545316	0.591077	0.656198	0.72192	0.740617	0.763975
0.536885	0.53424	0.482497	0.460404	0.430777	0.448324	0.459935	0.456851	0.434549	0.431347	0.407992	0.401749	0.399053	0.399616	0.384864	0.378681	0.38538	0.380711	0.391641	0.381485	0.393742	0.385299	0.388024	0.362926	0.372034	0.380678	0.370308	0.374818	0.381404	0.381285	0.377285	0.375918	0.364938	0.365535	0.362592	0.375917	0.391442	0.376017	0.369828	0.358996	0.381604	0.384861	0.383725	0.401161	0.426378	0.452237	0.501934	0.558148	0.638088	0.711234
0.405933	0.399971	0.453802	0.533354	0.484401	0.496063	0.469927	0.453826	0.474519	0.474676	0.489176	0.468161	0.450917	0.466936	0.451381	0.459377	0.472033	0.455921	0.426898	0.416882	0.409683	0.380024	0.362493	0.342669	0.318269	0.315193	0.330226	0.352591	0.338556	0.337061	0.340286	0.352241	0.363203	0.365078	0.358874	0.371248	0.371047	0.329067	0.314259	0.313104	0.314148	0.319766	0.312651	0.35022	0.338624	0.354117	0.38934	0.42291	0.485	0.543222
0.580129	0.630437	0.654132	0.642189	0.608595	0.69985	0.575096	0.56745	0.506351	0.480862	0.448325	0.449062	0.48376	0.48662	0.43938	0.429205	0.442656	0.4477	0.436149	0.432144	0.450006	0.413887	0.428564	0.414917	0.414791	0.39989	0.41441	0.413374	0.395822	0.415226	0.426775	0.411178	0.39371	0.421375	0.409955	0.441536	0.448509	0.431914	0.417458	0.433504	0.426658	0.432017	0.424693	0.427865	0.414701	0.420728	0.445636	0.446925	0.472498	0.473076
0.537941	0.48985	0.483888	0.50654	0.511223	0.529068	0.521064	0.513438	0.486213	0.488605	0.474955	0.476428	0.442563	0.463679	0.434355	0.41263	0.423874	0.425872	0.429792	0.444168	0.447077	0.425671	0.404911	0.411547	0.396069	0.390543	0.367451	0.408759	0.389787	0.350744	0.360649	0.509688	0.401199	0.382945	0.371434	0.342322	0.35364	0.342178	0.325418	0.328268	0.339419	0.358902	0.399135	0.429494	0.522057	0.561738	0.644994	0.686177	0.743968	0.874742
0.373074	0.39084	0.388433	0.381158	0.376532	0.384315	0.373012	0.372737	0.363565	0.386378	0.356868	0.362021	0.370727	0.397013	0.379422	0.373461	0.367122	0.386796	0.386012	0.399503	0.387254	0.397238	0.413116	0.41909	0.415951	0.401081	0.398011	0.397854	0.389813	0.384255	0.370685	0.371779	0.357711	0.348273	0.349414	0.342056	0.366549	0.368001	0.367246	0.378247	0.388755	0.391689	0.393936	0.407095	0.445126	0.485488	0.550713	0.632625	0.667354	0.7261
0.575063	0.54914	0.53168	0.539138	0.563021	0.566086	0.555564	0.579448	0.540762	0.539514	0.528532	0.500102	0.508673	0.490209	0.475988	0.444591	0.438858	0.432096	0.41338	0.420977	0.385414	0.400172	0.389723	0.385904	0.376428	0.367871	0.379571	0.367797	0.361021	0.350987	0.345904	0.337468	0.34094	0.34245	0.344011	0.346092	0.350752	0.340743	0.343978	0.332711	0.344656	0.34023	0.343017	0.366332	0.354356	0.370625	0.374303	0.370876	0.392935	0.416309
0.561013	0.532869	0.559765	0.547823	0.521783	0.496658	0.468978	0.460705	0.434776	0.479496	0.482631	0.517514	0.521263	0.53182	0.496845	0.484309	0.556983	0.533598	0.546916	0.536199	0.519126	0.512848	0.51634	0.500812	0.456132	0.441202	0.434613	0.470646	0.466211	0.455851	0.434482	0.356677	0.323669	0.365937	0.349099	0.359131	0.415418	0.409616	0.482503	0.478304	0.479322	0.441778	0.432868	0.433592	0.431359	0.429362	0.437572	0.444367	0.459551	0.442938
0.558501	0.597624	0.63801	0.721645	0.737681	0.651391	0.649018	0.589384	0.540192	0.522227	0.547285	0.514086	0.562638	0.552735	0.511846	0.49045	0.46768	0.475869	0.492483	0.498518	0.487262	0.489534	0.465012	0.46909	0.466673	0.473446	0.481575	0.487149	0.458894	0.449116	0.442795	0.447528	0.409106	0.413057	0.415808	0.410446	0.416735	0.395598	0.404119	0.415203	0.403149	0.408846	0.439639	0.452167	0.479526	0.499074	0.513329	0.533804	0.578954	0.623673
0.342652	0.330247	0.333185	0.307256	0.272552	0.300303	0.29117	0.284004	0.249174	0.263158	0.26307	0.266739	0.268652	0.264031	0.263903	0.270625	0.26856	0.264328	0.261624	0.279133	0.267012	0.269049	0.26712	0.268103	0.265836	0.266842	0.257152	0.257634	0.253435	0.263324	0.266862	0.279606	0.286993	0.280419	0.266885	0.26783	0.2785	0.27855	0.26885	0.268389	0.2708	0.2719	0.263814	0.271613	0.298169	0.335085	0.383362	0.416349	0.472171	0.50347
0.529887	0.533733	0.51129	0.480334	0.474731	0.469427	0.431994	0.407941	0.347762	0.345595	0.370094	0.366847	0.343552	0.339399	0.337058	0.344369	0.328654	0.338841	0.323097	0.320744	0.303167	0.279982	0.294354	0.308781	0.324774	0.317154	0.297693	0.287784	0.291956	0.30028	0.28531	0.305294	0.317045	0.312982	0.325719	0.343109	0.333338	0.325448	0.299362	0.296217	0.30118	0.294583	0.30747	0.331586	0.403163	0.479806	0.550155	0.610939	0.650715	0.654649
0.436588	0.457263	0.464807	0.453276	0.440459	0.429038	0.409374	0.384446	0.354321	0.340676	0.321176	0.308755	0.293775	0.284732	0.265874	0.270985	0.274586	0.271936	0.25779	0.272226	0.274439	0.281422	0.271423	0.270175	0.261172	0.253099	0.270272	0.26018	0.273113	0.282473	0.282763	0.282712	0.290196	0.299244	0.303771	0.311881	0.31603	0.316092	0.324557	0.335329	0.351658	0.38549	0.421429	0.489551	0.545815	0.59197	0.672997	0.732496	0.784907	0.82097
0.430445	0.394354	0.352952	0.309617	0.271404	0.256926	0.249526	0.237434	0.22267	0.236737	0.235721	0.234694	0.242155	0.235359	0.254844	0.268899	0.29292	0.303194	0.310994	0.331925	0.336045	0.362986	0.335538	0.346646	0.359583	0.368514	0.400312	0.39904	0.397014	0.363126	0.358234	0.345148	0.342342	0.319176	0.321458	0.329658	0.335217	0.3082	0.319551	0.320803	0.318374	0.32793	0.34477	0.802503	0.629928	0.532554	0.508025	0.527071	0.534039	0.544527
0.357075	0.334255	0.348782	0.361594	0.332997	0.32762	0.321277	0.313973	0.309871	0.298832	0.276567	0.317809	0.355752	0.408321	0.457751	0.421859	0.397451	0.424526	0.393449	0.369322	0.323205	0.318453	0.342841	0.345535	0.32353	0.322009	0.32374	0.332204	0.350624	0.353451	0.34947	0.334773	0.335751	0.319455	0.303028	0.297719	0.288054	0.284635	0.312321	0.332987	0.360425	0.395474	0.404254	0.437379	0.464452	0.51231	0.556325	0.615009	0.650612	0.665601
0.427665	0.416677	0.41414	0.379346	0.401164	0.419327	0.411547	0.439779	0.462667	0.467755	0.469683	0.425357	0.41532	0.406804	0.378876	0.372829	0.391171	0.391312	0.403696	0.387794	0.368974	0.378423	0.348281	0.346777	0.360052	0.374334	0.375139	0.373572	0.378968	0.379102	0.360889	0.370953	0.360194	0.358967	0.359408	0.349677	0.347008	0.340913	0.345876	0.348478	0.342915	0.362198	0.370282	0.383309	0.429047	0.480061	0.540174	0.591934	0.612054	0.675779
0.482664	0.467017	0.483321	0.477268	0.483446	0.462773	0.460569	0.450473	0.461097	0.444568	0.423089	0.448683	0.440407	0.438658	0.416733	0.463678	0.399566	0.384534	0.391145	0.409868	0.407336	0.398677	0.400716	0.416515	0.3954	0.382081	0.384088	0.365884	0.386663	0.383514	0.376783	0.380707	0.378081	0.378459	0.378115	0.384982	0.367227	0.368159	0.36871	0.366974	0.375488	0.391992	0.381508	0.389698	0.40915	0.429307	0.43599	0.441304	0.436647	0.463935
0.574569	0.576234	0.568694	0.576764	0.543062	0.54637	0.4985	0.511307	0.535144	0.533028	0.533002	0.547799	0.5436	0.559217	0.557709	0.561051	0.499779	0.483609	0.492118	0.470336	0.476683	0.465398	0.467602	0.453379	0.453028	0.442339	0.451176	0.424996	0.449797	0.439989	0.430358	0.432728	0.418842	0.418007	0.411055	0.423043	0.413673	0.396342	0.391471	0.392112	0.374201	0.381278	0.379526	0.391562	0.393501	0.394344	0.40168	0.409999	0.420106	0.434892
			0.356124	0.371009	0.384371	0.403986	0.397207	0.399598	0.382677	0.389601	0.403771	0.386749	0.381674	0.366393	0.393797	0.406267	0.429149	0.470441	0.449267	0.436696	0.479397	0.492977	0.51718	0.501976	0.53328	0.475129	0.457138	0.445998	0.438947	0.415462	0.395961	0.359178	0.32568	0.322826	0.327769	0.361079	0.341672	0.334797	0.314212	0.317026	0.356086	0.366391	0.364656	0.352082	0.398969	0.463041	0.532694	0.621289	0.66475
																						0.381264	0.380954	0.403594	0.412076	0.423363	0.425796	0.42661	0.435174	0.401749	0.383182	0.398633	0.412582	0.406615	0.407359	0.394769	0.408419	0.438159	0.431297	0.425448	0.449729	0.447533	0.464952	0.478535	0.486533	0.533148	0.561912	0.668809	0.702495
0.49231	0.474595	0.513427	0.507627	0.46249	0.462645	0.446744	0.449169	0.441999	0.414691	0.424666	0.417036	0.420353	0.411237	0.404371	0.414056	0.413189	0.429073	0.437037	0.419476	0.423201	0.419028	0.410249	0.422814	0.419277	0.399261	0.377738	0.379532	0.353883	0.349924	0.346563	0.313616	0.314454	0.29944	0.306653	0.296296	0.330124	0.351164	0.344207	0.339378	0.343912	0.334347	0.354677	0.354742	0.348311	0.369871	0.364946	0.388313	0.430455	0.440425
0.348185	0.40876	0.404023	0.399852	0.376835	0.379449	0.352625	0.36105	0.354575	0.369184	0.380612	0.45627	0.41943	0.435972	0.386829	0.387862	0.375298	0.337871	0.360301	0.355981	0.363009	0.335148	0.329841	0.325898	0.318989	0.323212	0.314557	0.339579	0.316493	0.336934	0.318351	0.317885	0.308951	0.314058	0.327296	0.311524	0.321503	0.320093	0.286904	0.266383	0.263788	0.242195	0.234172	0.232052	0.243271	0.240717	0.262569	0.282256	0.336811	0.388115
0.461186	0.489439	0.487945	0.470658	0.480144	0.467322	0.453827	0.428244	0.433735	0.444523	0.425194	0.416636	0.408579	0.423136	0.432112	0.42151	0.431924	0.431525	0.434781	0.439186	0.451338	0.44094	0.427082	0.420722	0.429314	0.428329	0.422678	0.445891	0.437747	0.44069	0.462172	0.455097	0.42867	0.433061	0.443322	0.459817	0.470034	0.475648	0.469335	0.469886	0.463686	0.466174	0.473067	0.466427	0.482378	0.462892	0.470069	0.486496	0.522996	0.547318
0.54617	0.493144	0.590395	0.571901	0.543847	0.478658	0.481781	0.452196	0.440993	0.391261	0.37571	0.367952	0.358321	0.370849	0.371768	0.372866	0.396527	0.372069	0.3745	0.38161	0.390247	0.408625	0.407288	0.426314	0.458526	0.445954	0.442418	0.441773	0.439938	0.43974	0.445916	0.441871	0.427832	0.419905	0.431765	0.402082	0.412508	0.412571	0.412572	0.409195	0.413851	0.392247	0.363756	0.364364	0.379594	0.393589	0.412021	0.444419	0.482742	0.529565
0.474628	0.471527	0.461512	0.458346	0.478108	0.50559	0.492422	0.461896	0.469542	0.439195	0.418095	0.435729	0.413642	0.408644	0.395236	0.382414	0.39493	0.39148	0.387597	0.396645	0.399062	0.388716	0.400307	0.388838	0.397261	0.387607	0.378017	0.370036	0.373005	0.365633	0.360456	0.356311	0.363814	0.341752	0.342988	0.341922	0.345904	0.350804	0.356601	0.364216	0.357145	0.337376	0.332267	0.316315	0.308732	0.307402	0.316206	0.327448	0.349043	0.390514
0.555214	0.557047	0.53618	0.497928	0.514737	0.538077	0.561105	0.509484	0.526344	0.50474	0.534059	0.539666	0.476191	0.465077	0.465651	0.431793	0.453572	0.442892	0.453889	0.454247	0.466178	0.432708	0.406281	0.392018	0.412292	0.392394	0.421308	0.420998	0.406068	0.371323	0.386955	0.398027	0.394889	0.392231	0.394519	0.403088	0.417784	0.41702	0.396769	0.366444	0.374464	0.36945	0.446111	0.487732	0.423546	0.443764	0.500605	0.532185	0.576456	0.67443
															0.543892	0.579609	0.582488	0.554182	0.543255	0.513623	0.518451	0.525366	0.498195	0.507193	0.493282	0.480022	0.470266	0.469518	0.474329	0.500885	0.498327	0.511347	0.529793	0.528624	0.502764	0.509313	0.523087	0.527844	0.555197	0.570765	0.596815	0.581222	0.614427	0.619839	0.632072	0.662194	0.690427	0.706122	0.740641
																								0.459272	0.458677	0.444691	0.43345	0.439017	0.445988	0.444037	0.435222	0.443398	0.439192	0.41943	0.404653	0.401579	0.407683	0.402076	0.440372	0.448029	0.464292	0.498695	0.530053	0.578344	0.649162	0.738503	0.805158	0.858505	0.897552
0.596999	0.573128	0.565176	0.574053	0.579682	0.575306	0.576524	0.502309	0.48362	0.456523	0.40519	0.3729	0.361689	0.354396	0.358305	0.376543	0.344076	0.313742	0.321356	0.313403	0.324952	0.322024	0.30592	0.334247	0.353747	0.351761	0.366848	0.370841	0.358506	0.369052	0.371504	0.387715	0.400463	0.31785	0.332487	0.363467	0.322165	0.309833	0.337907	0.311069	0.30762	0.309675	0.330926	0.349271	0.385395	0.451028	0.537583	0.574116	0.648683	0.697506
0.388114	0.451565	0.456339	0.431383	0.416618	0.430706	0.414505	0.408888	0.428073	0.414858	0.403068	0.394826	0.385254	0.380824	0.401319	0.379879	0.330055	0.350569	0.353261	0.347611	0.37362	0.342177	0.360471	0.356956	0.34512	0.328636	0.308995	0.308297	0.3069	0.307817	0.287925	0.278828	0.278368	0.291521	0.306739	0.287658	0.27968	0.261082	0.270453	0.285461	0.298552	0.313209	0.328595	0.372467	0.384716	0.423508	0.457062	0.519877	0.59995	0.631839
	0.708768	0.695022	0.765611	0.74669	0.767652	0.804531	0.788299	0.764448	0.706271	0.630512	0.577045	0.59123	0.585424	0.557365	0.568781	0.534507	0.527109	0.50054	0.485935	0.479974	0.482719	0.475377	0.491111	0.464405	0.458758	0.451012	0.468493	0.456491	0.460699	0.453698	0.449435	0.444824	0.444946	0.441772	0.446606	0.459691	0.469834	0.466626	0.474149	0.474593	0.47396	0.485577	0.499199	0.498243	0.492475	0.50688	0.520609	0.539121	0.559655
0.437673	0.494325	0.446857	0.461365	0.459049	0.473745	0.488432	0.497163	0.483868	0.475016	0.471722	0.464847	0.466803	0.465121	0.443731	0.462998	0.465751	0.428942	0.431517	0.438227	0.425632	0.437704	0.423606	0.45057	0.453721	0.434687	0.437737	0.466878	0.442901	0.441948	0.446102	0.417194	0.421797	0.396593	0.412477	0.405877	0.36705	0.362787	0.40313	0.37213	0.392792	0.407295	0.391051	0.411536	0.410493	0.43278	0.446264	0.462384	0.509542	0.534604
0.385898	0.421235	0.491301	0.429849	0.394863	0.393727	0.380467	0.3864	0.380456	0.351491	0.35586	0.332891	0.347364	0.376041	0.378485	0.392304	0.428588	0.436217	0.45951	0.447003	0.40771	0.411418	0.423364	0.428952	0.396321	0.397777	0.38631	0.34168	0.317171	0.313666	0.313284	0.298852	0.29682	0.275789	0.264451	0.296296	0.299563	0.304661	0.312024	0.333845	0.35049	0.352912	0.399561	0.43827	0.483059	0.548633	0.579682	0.619366	0.659524	0.675708
														0.411574	0.431833	0.410832	0.371904	0.364975	0.354346	0.329047	0.324529	0.348018	0.354681	0.349166	0.337321	0.348939	0.350021	0.348242	0.346002	0.334749	0.343659	0.333946	0.311947	0.333153	0.351088	0.369642	0.380637	0.409436	0.432724	0.463578	0.467632	0.485144	0.531882	0.609011	0.7147	0.778014	0.845648	0.867139	0.901289
0.475228	0.472409	0.500198	0.517337	0.491344	0.489558	0.488558	0.48689	0.488141	0.468622	0.440831	0.444686	0.434733	0.429357	0.444025	0.450161	0.442015	0.432419	0.443267	0.458963	0.459631	0.404033	0.42894	0.400063	0.429782	0.428551	0.430198	0.414426	0.44282	0.446127	0.445322	0.420072	0.401402	0.410229	0.397735	0.413396	0.419339	0.433656	0.433841	0.443079	0.44998	0.46228	0.482791	0.50467	0.538741	0.562822	0.575013	0.611716	0.656013	0.681516
0.56675	0.531993	0.517804	0.534121	0.544062	0.530267	0.631834	0.609428	0.610225	0.593575	0.574933	0.558055	0.515721	0.520289	0.543419	0.566645	0.557728	0.542994	0.536	0.498912	0.475029	0.474599	0.460015	0.463341	0.44401	0.439699	0.440247	0.428104	0.441004	0.456782	0.453404	0.452439	0.417732	0.431491	0.437662	0.420693	0.427984	0.451664	0.491428	0.506682	0.520714	0.523365	0.548149	0.55813	0.579329	0.628361	0.618758	0.646647	0.665284	0.698061
0.36776	0.373763	0.373023	0.375559	0.444905	0.446308	0.503432	0.487056	0.522343	0.520335	0.469489	0.472088	0.472343	0.45571	0.456107	0.443662	0.455008	0.437576	0.415391	0.39619	0.407426	0.427472	0.390276	0.401576	0.393147	0.37459	0.378652	0.374288	0.389237	0.385802	0.367527	0.366765	0.358717	0.367035	0.365396	0.372271	0.389698	0.374946	0.363094	0.398314	0.421374	0.424849	0.427753	0.429391	0.447338	0.510599	0.600403	0.725808	0.813284	0.880053
0.487268	0.506104	0.54262	0.528499	0.555119	0.530525	0.528346	0.549822	0.530359	0.522828	0.515539	0.523277	0.513077	0.523781	0.524026	0.527245	0.524832	0.538769	0.543839	0.527117	0.529825	0.516905	0.532405	0.549077	0.54009	0.490053	0.430277	0.413962	0.412752	0.419169	0.405699	0.409989	0.403424	0.413691	0.421354	0.409658	0.39086	0.370302	0.351238	0.35707	0.343954	0.375709	0.418019	0.406563	0.398166	0.392873	0.404306	0.422859	0.431874	0.518456
0.583976	0.520044	0.517625	0.519405	0.491564	0.484093	0.492183	0.468204	0.461598	0.447776	0.433379	0.455869	0.45573	0.454895	0.43286	0.442684	0.423596	0.39542	0.391527	0.404621	0.378713	0.371693	0.395928	0.404148	0.412057	0.405547	0.412438	0.415699	0.417988	0.4179	0.413086	0.410066	0.411917	0.39957	0.406726	0.436129	0.435075	0.422999	0.451635	0.475864	0.505785	0.54662	0.614143	0.658217	0.704972	0.738186	0.744921	0.780214	0.810238	0.821998
[truncated: 41 more rows]
[truncated: 25 more columns]

## Sheet: CDK2 III(60uM)_G1 (CDK4)
Time since mitogen stimulation (hr)
0.2	0.4	0.6	0.8	1	1.2	1.4	1.6	1.8	2	2.2	2.4	2.6	2.8	3	3.2	3.4	3.6	3.8	4	4.2	4.4	4.6	4.8	5	5.2	5.4	5.6	5.8	6	6.2	6.4	6.6	6.8	7	7.2	7.4	7.6	7.8	8	8.2	8.4	8.6	8.8	9	9.2	9.4	9.6	9.8	10
[truncated: 141 more rows]
[truncated: 25 more columns]

[truncated: 18 more sheets: Roscovatin (60uM)_G1 (CDK2), Roscovatin (60uM)_G1 (CDK4), CDK1_G1 (CDK2), CDK1_G1 (CDK4), DMSO_S (CDK2), DMSO_S (CDK4), Palbociclib_S (CDK2), Palbociclib_S (CDK4), Abemaciclib_S (CDK2), Abemaciclib_S (CDK4), Ribociclib_S (CDK2), Ribociclib_S (CDK4), CDK2 III(60uM)_S (CDK2), CDK2 III(60uM)_S (CDK4), Roscovatin (60uM)_S (CDK2), Roscovatin (60uM)_S (CDK4), CDK1_S (CDK2), CDK1_S (CDK4)]
