# Supplementary material for: Stress-mediated exit to quiescence restricted by increasing persistence in CDK4/6 activation
Source: eLife journal article supplement (doi:10.7554/elife.44571), 2020-04-07
Supplement: supp [file elife_poa_e44571_Figure_4_source_data_1.xlsx]

## Sheet: Data
Fraction	Control	Mitogen withdrawal	TGF-b1(4)	NaCl(100mM)	H2O2(200uM)	Oligomycin A(1uM)+AntimycinA(1uM)	Tunicamycin(5uM)	Palbo(1uM)	NCS(200)
G1 phase	0.946429	0.768786	0.77381	0.527397	0.901408	0.854701	0.767857	0.349206	0.676923
	0.904762	0.809524	0.757576	0.439024	0.384615	0.625	0.5	0.111111	0.473684
	0.881579	0.5	0.785714	0.555556	0.12	0.738095	0.4	0.151515	0.458333
S phase	1	1	0.986842	1	1	1	1	0.980952	1
	1	1	1	0.971429	0.761905	0.954545	1	1	0.958333
	1	1	1	1	0.923077	1	1	0.903226	1
