# Supplementary figures and images for: Stress-mediated exit to quiescence restricted by increasing persistence in CDK4/6 activation
Source: eLife journal article supplement (doi:10.7554/elife.44571), 2020-04-07

Figure 1 - supplementary figure 2

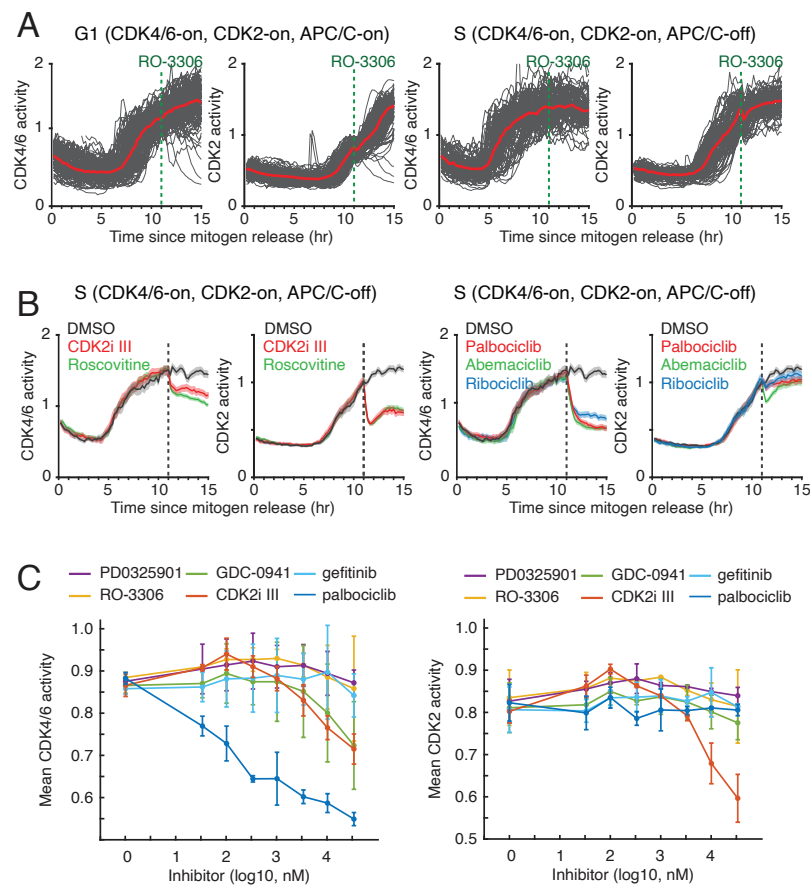

Supplement: supp [file elife_poa_e44571_Figure_1_figure_supplement_2.pdf › elife_poa_e44571_Figure_1_figure_supplement_2.pdf]

Figure 1 - supplementary figure 3

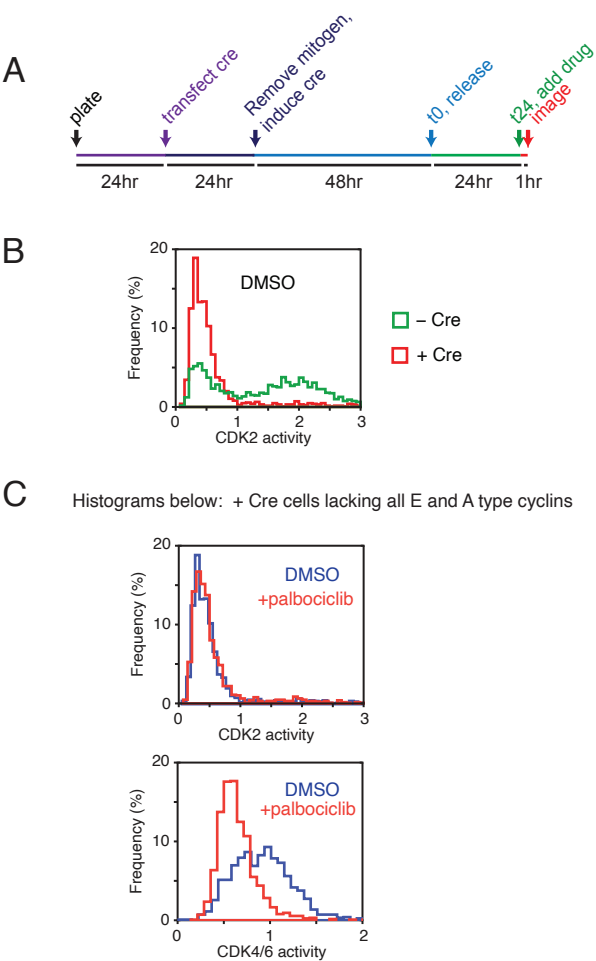

Supplement: supp [file elife_poa_e44571_Figure_1_figure_supplement_3.pdf › elife_poa_e44571_Figure_1_figure_supplement_3.pdf]

Figure 1 - supplementary figure 4

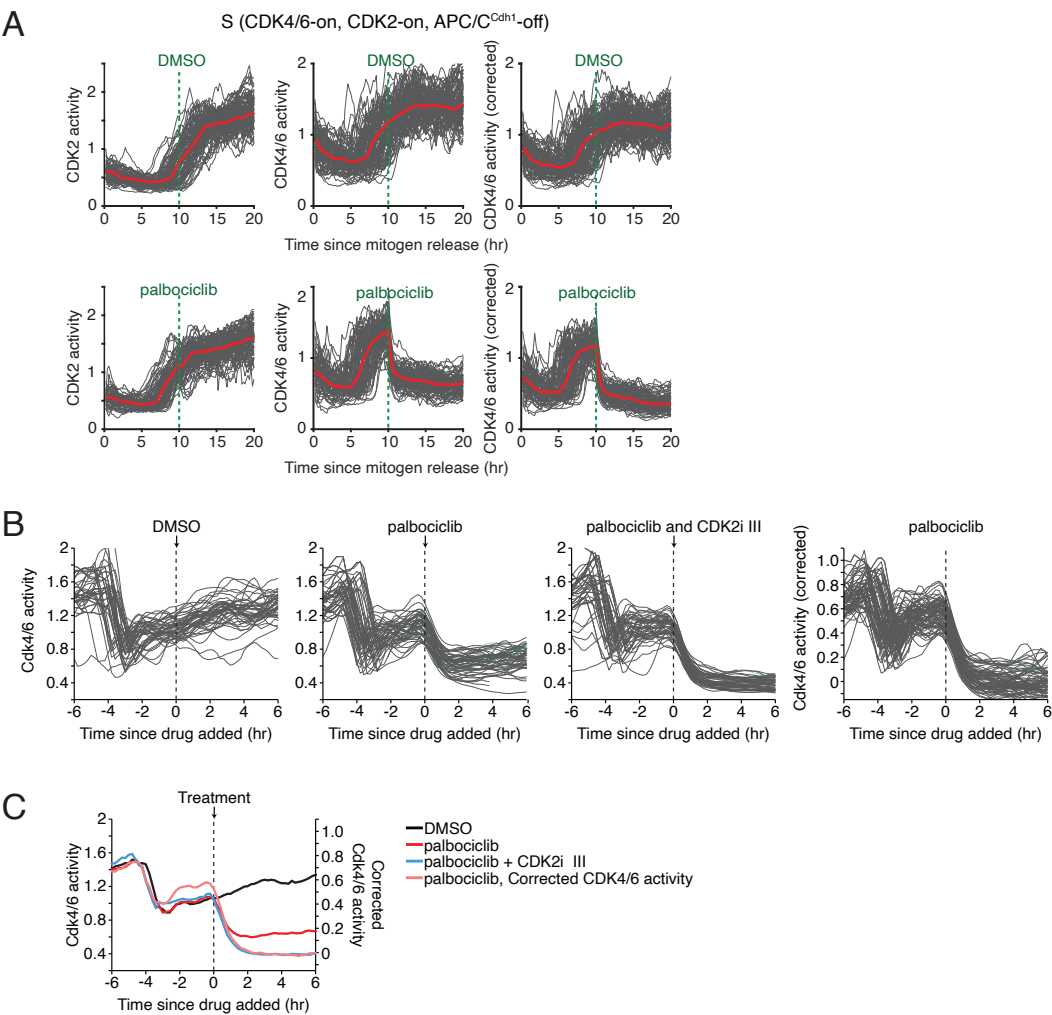

Supplement: supp [file elife_poa_e44571_Figure_1_figure_supplement_4.pdf › elife_poa_e44571_Figure_1_figure_supplement_4.pdf]

Figure 2 - supplementary figure 1

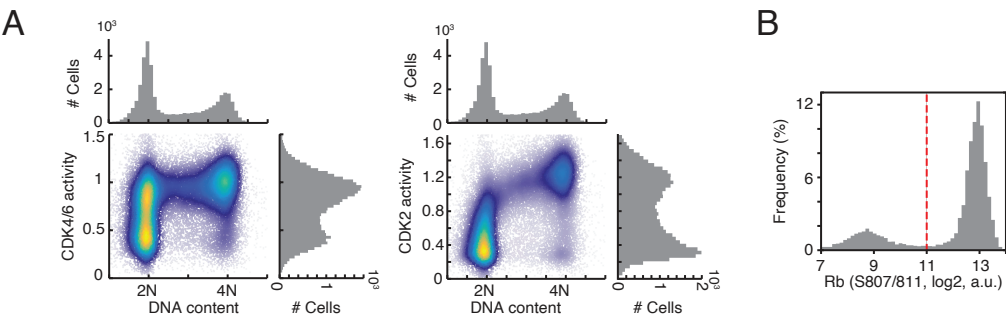

Supplement: supp [file elife_poa_e44571_Figure_2_figure_supplement_1.pdf › elife_poa_e44571_Figure_2_figure_supplement_1.pdf]

Figure 2 - supplementary figure 2

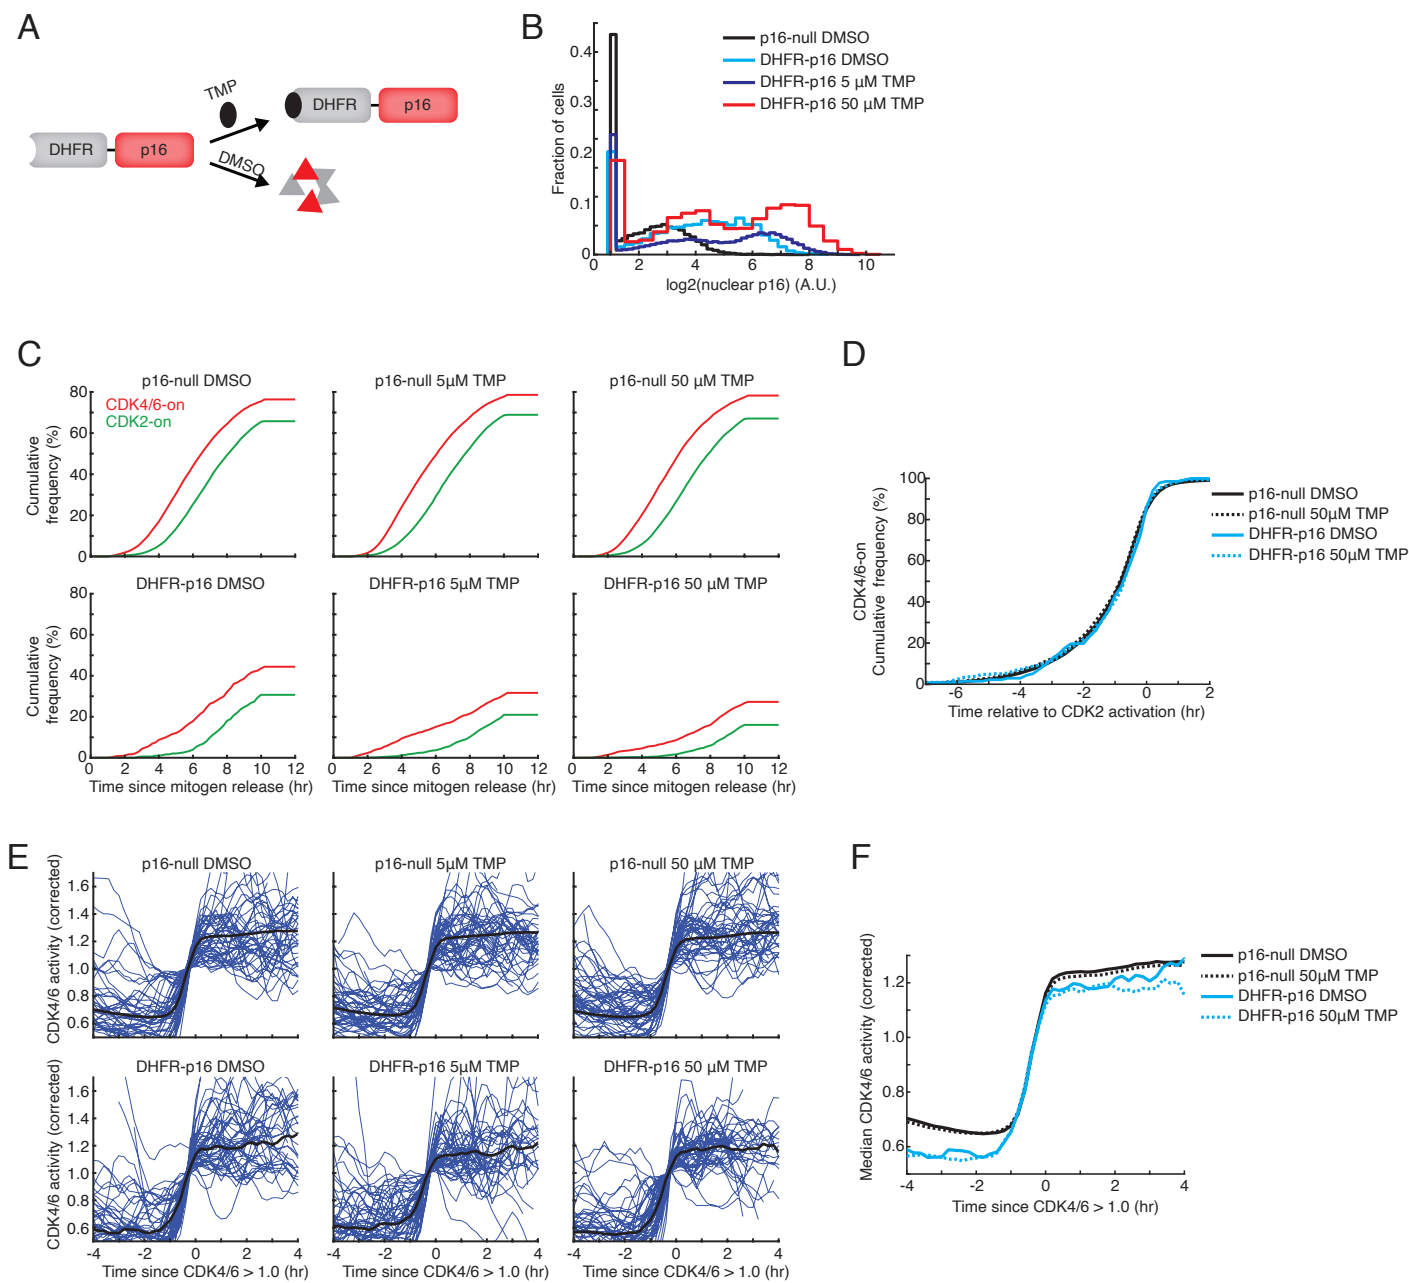

Supplement: supp [file elife_poa_e44571_Figure_2_figure_supplement_2.pdf › elife_poa_e44571_Figure_2_figure_supplement_2.pdf]

Figure 3 - supplementary figure 1

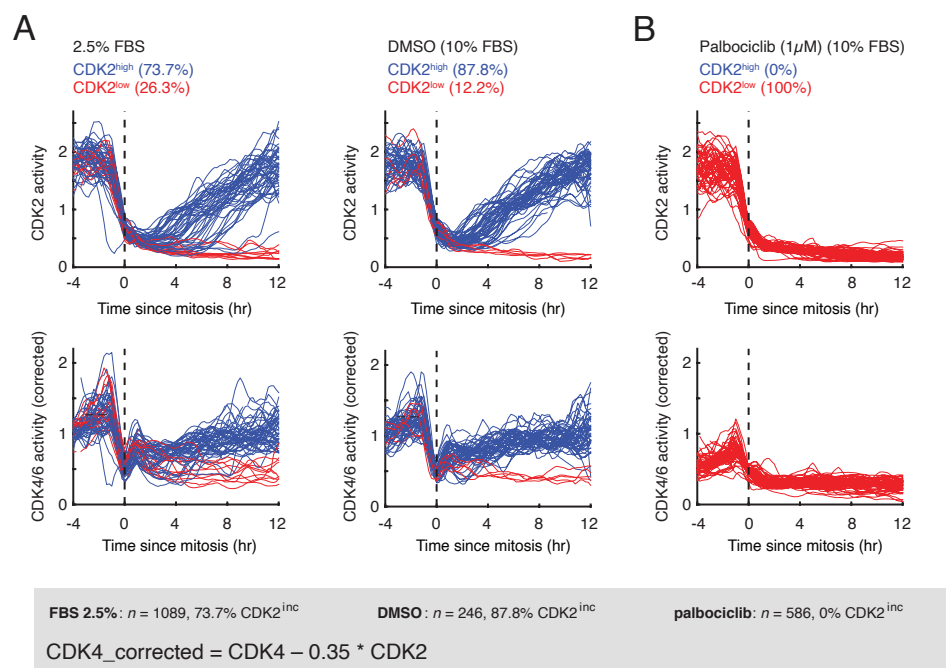

Supplement: supp [file elife_poa_e44571_Figure_3_figure_supplement_1.pdf › elife_poa_e44571_Figure_3_figure_supplement_1.pdf]

Figure 4 - supplementary figure 1

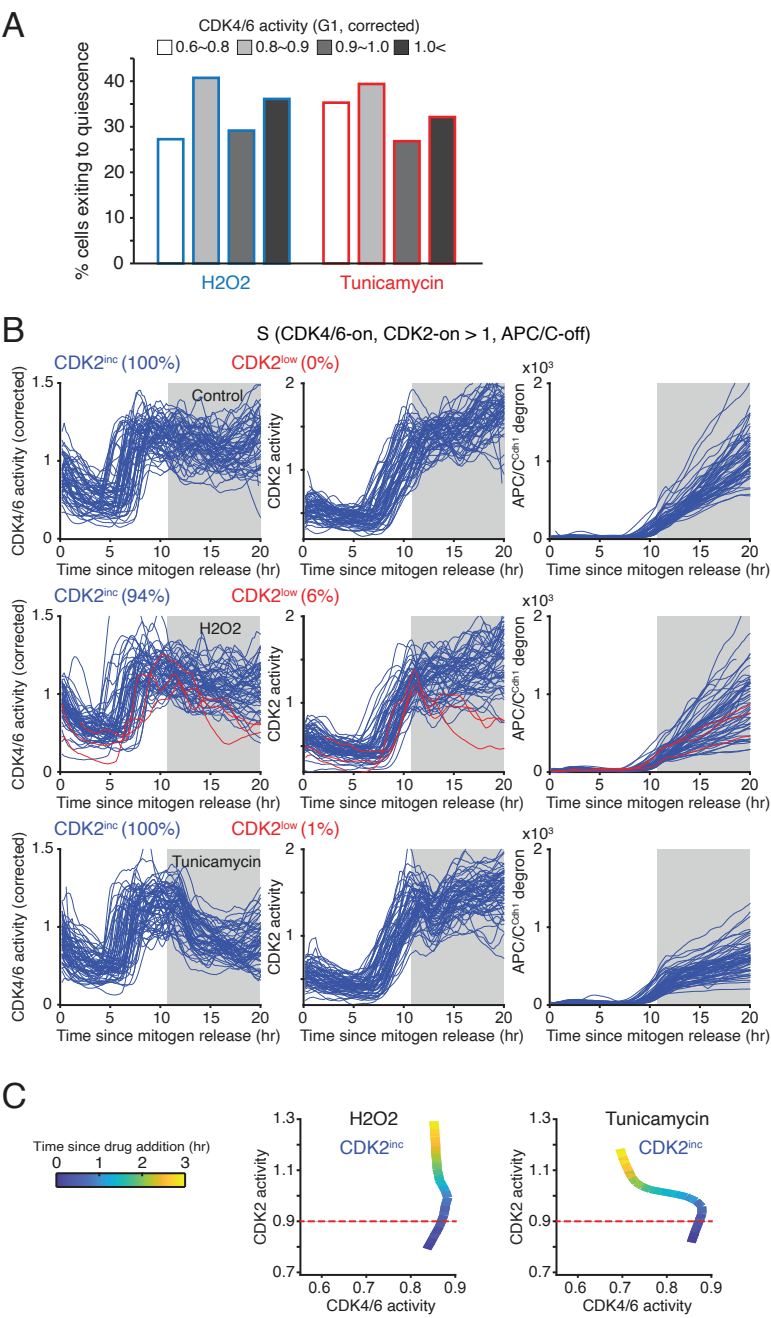

Supplement: supp [file elife_poa_e44571_Figure_4_figure_supplement_1.pdf › elife_poa_e44571_Figure_4_figure_supplement_1.pdf]

Figure 4 - supplementary figure 2

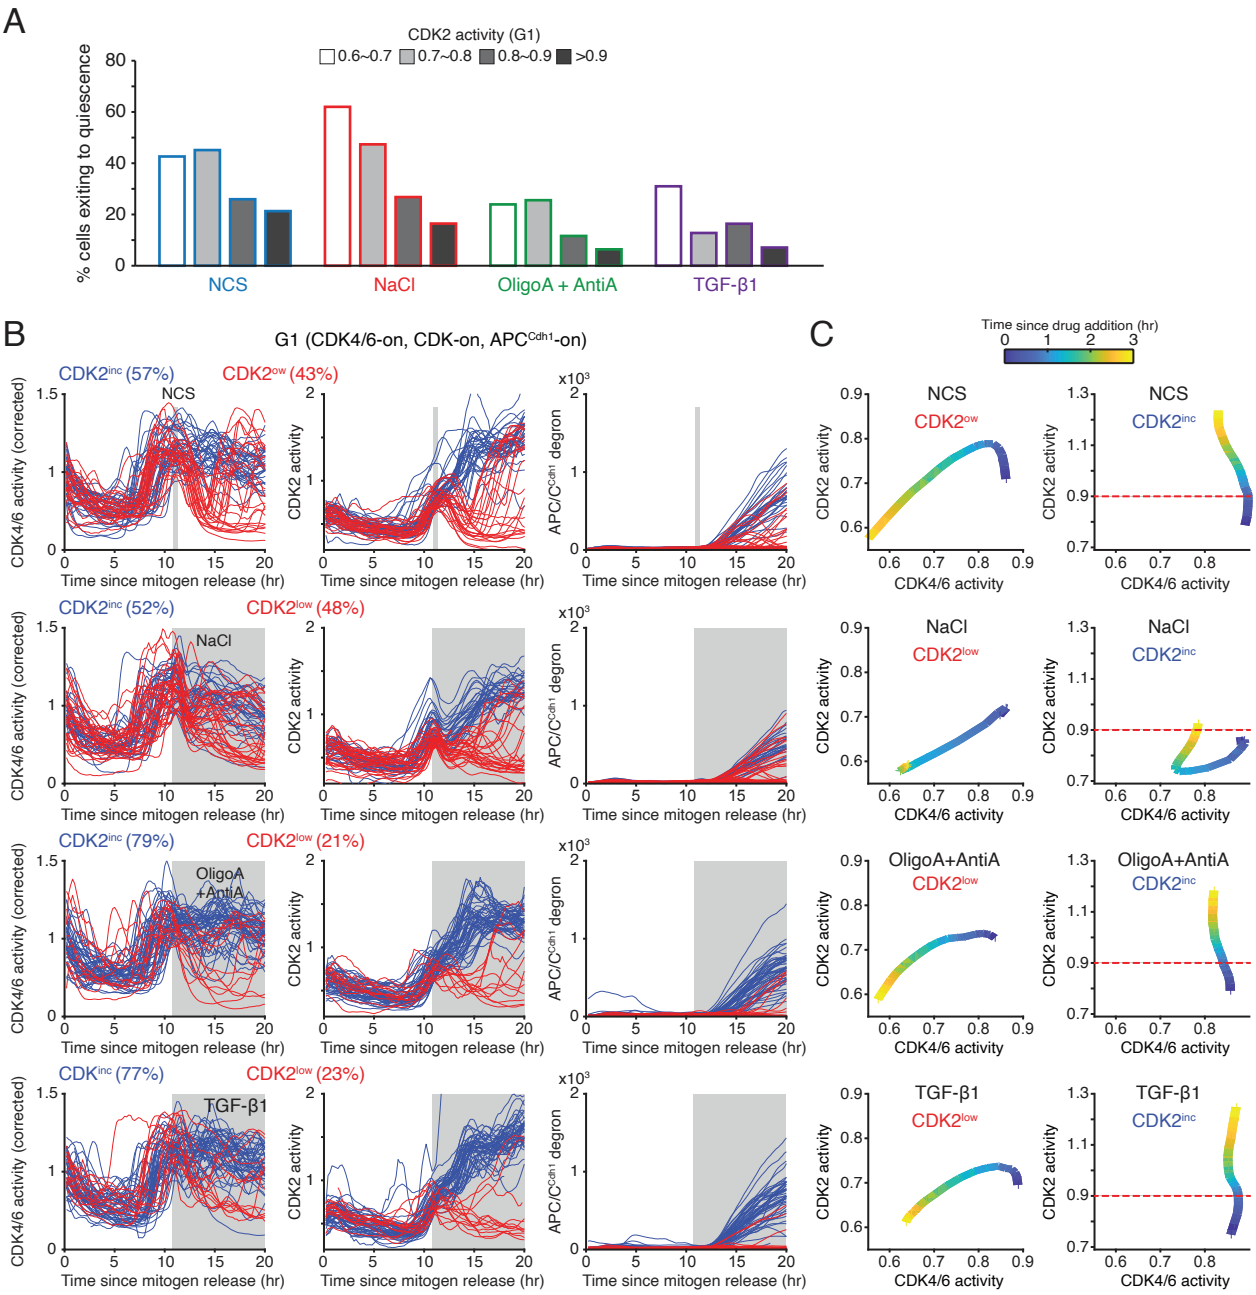

Supplement: supp [file elife_poa_e44571_Figure_4_figure_supplement_2.pdf › elife_poa_e44571_Figure_4_figure_supplement_2.pdf]
